# Supplementary material for: Metabolomic and transcriptomic analyses of drought resistance mechanisms in sorghum varieties
Source: PeerJ. 2025 Jul 4;13:e19596. doi: 10.7717/peerj.19596 (PMC12232930; doi:10.7717/peerj.19596)
Supplement: Supplemental Information 1 [file peerj-13-19596-s001.xls]

## Sheet: Supplementary Table S5
Table S1: Summary of RNA-seq quality
Samples	Clean reads	Clean bases	GC Content	%≥Q30
GL220A1	20892398	6252645764	0.5455	0.9508
GL220A2	23861556	7141186546	0.5381	0.9545
GL220A3	21674601	6488969244	0.5373	0.9527
GL220B1	20738414	6208267214	0.5487	0.9452
GL220B2	20885803	6251168276	0.5451	0.9533
GL220B3	20552706	6152753952	0.5377	0.954
GL98C1	20441684	6119255806	0.5396	0.9503
GL98C2	20194751	6045904146	0.5385	0.9554
GL98C3	20902591	6258902552	0.5296	0.9495
GL98D1	19444175	5820262192	0.5424	0.9514
GL98D2	20745508	6210300618	0.5396	0.9544
GL98D3	20358514	6095948666	0.544	0.955
