# Supplementary material for: Metabolomic and transcriptomic analyses of drought resistance mechanisms in sorghum varieties
Source: PeerJ. 2025 Jul 4;13:e19596. doi: 10.7717/peerj.19596 (PMC12232930; doi:10.7717/peerj.19596)
Supplement: Supplemental Information 2 [file peerj-13-19596-s002.xls]

## Sheet: Supplementary Table S1 
Table S2: Metabolite analysis in Four groups of samples
ID	name	Total score	MS2 score	Mass Error (ppm)	Formula	m/z	Retention time (min)	KEGG_annotation	KEGG_pathway_annotation	LM_ID(lipidmaps)	CATEGORY(lipidmaps)	MAIN_CLASS(lipidmaps)	SUB_CLASS	HMDB_ID	CAS	kingdom(HMDB)	super_class(HMDB)	HMDB_taxonomy	sub_class(HMDB)	GL98A2	GL98A3	GL98A4	GL98A5	GL98A1	GL98B1	GL98B2	GL98B3	GL98B4	GL98B5	GL220C1	GL220C2	GL220C3	GL220C4	GL220C5	GL220D1	GL220D2	GL220D3	GL220D4	GL220D5
neg_10008	Kuguaglycoside C	47.1	45.8	-0.404604	C36H56O8	637.372	8.40977	--	--	--	--	--	--	--	--	--	--	--	--	34841.5	1724.73	2734.99	3154.69	2142.3	1092.78	740.504	1355.04	1133.49	561.042	64247.8	7168.71	21839.2	4279.01	1453	635.581	2406.51	453.476	493.627	559.063
neg_10025	Leukotriene A4	44	26.5	3.22785	C20H30O3	363.218	8.41692	C00909	Arachidonic acid metabolism(ko00590);;Metabolic pathways(ko01100)	LMFA03020023	Fatty Acyls [FA]	Eicosanoids [FA03]	Leukotrienes [FA0302]	HMDB0001337	72059-45-1	Organic compounds	Lipids and lipid-like molecules	Fatty Acyls	Fatty acids and conjugates	1.23e-12	65.9087	24.1919	39.0938	39.3094	216.796	142.907	147.687	36.4972	460.535	52.2172	73.5945	5.02471	242.912	6.31695	94.5925	135.98	26.6343	69.9802	23.9443
neg_10028	.alpha.-Linolenoyl ethanolamide	48.7	52.7	4.32365	C20H35NO2	366.266	8.41692	--	--	--	--	--	--	--	--	--	--	--	--	213.633	881.036	1252.48	992.852	924.735	1236.43	1345.79	1722.02	886.669	907.979	163.785	752.091	893.105	514.328	1870.11	1052.72	2014.29	735.879	929.389	1517.34
neg_10032	Phorbol 12-myristate 13-acetate	50.1	71.4	-4.31911	C36H56O8	651.364	8.41692	C05151	--	LMPR0104330002	Prenol Lipids [PR]	Isoprenoids [PR01]	C20 isoprenoids (diterpenes) [PR0104]	HMDB0244744	--	Organic compounds	Lipids and lipid-like molecules	Prenol lipids	Diterpenoids	694.107	673.966	865.34	1389.78	607.011	1354.63	1426.7	1317.38	814.014	698.746	1521.81	785.185	640.643	553.515	847.111	854.313	593.466	594.274	625.145	460.994
neg_10044	2-Oxo-2,3-dihydrofuran-5-acetate	47.7	58.8	16.4938	C6H6O4	187.003	8.45267	C03586	Metabolic pathways(ko01100)	--	--	--	--	--	--	--	--	--	--	192.409	115.82	139.101	107.436	167.04	92.5753	80.3693	91.2582	159.225	137.332	184.511	137.321	186.462	130.64	137.518	92.1193	203.464	107.412	104.84	139.401
neg_10052	all-trans-4-Hydroxyretinoic acid	43.9	50.6	-12.6947	C20H28O3	631.392	8.47412	C16677	Metabolic pathways(ko01100)	LMPR01090025	Prenol Lipids [PR]	Isoprenoids [PR01]	Retinoids [PR0109]	HMDB0006254	66592-72-1	Organic compounds	Lipids and lipid-like molecules	Prenol lipids	Retinoids	66.9271	88.818	57.6904	140.869	42.9741	275.395	123.78	154.805	76.4767	9.33728	20.8618	10.1268	18.4675	45.9245	96.6628	30.2325	13.0148	9.12937	36.5561	15.2502
neg_10057	PGK2	43.8	26	3.39856	C20H30O5	349.203	8.48127	--	--	LMFA03010023	Fatty Acyls [FA]	Eicosanoids [FA03]	Prostaglandins [FA0301]	--	--	--	--	--	--	14199.4	1131.17	1927.05	849.823	982.809	47.0299	61.9466	32.7848	868.096	31.4995	31622.2	5409.5	13046.2	4375.41	561.293	24.8548	3030.67	16.9274	19.729	27.3065
neg_10065	Fucoxanthin	47.4	71.4	-22.7325	C42H58O6	679.383	8.48842	C08596	--	LMPR01070300	Prenol Lipids [PR]	Isoprenoids [PR01]	C40 isoprenoids (tetraterpenes) [PR0107]	HMDB0002741	3351-86-8	Organic compounds	Lipids and lipid-like molecules	Prenol lipids	Tetraterpenoids	876.925	97.2212	148.258	112.828	25.2545	108.544	31.999	73.2502	34.9114	59.882	6178.22	103.735	526.174	185.665	90.835	16.6827	26.439	35.6714	83.0159	97.9854
neg_10068	Chlorobactene	41.6	48	-35.551	C40H52	577.386	8.50272	C15908	Carotenoid biosynthesis(ko00906);;Biosynthesis of secondary metabolites(ko01110)	LMPR01070163	Prenol Lipids [PR]	Isoprenoids [PR01]	C40 isoprenoids (tetraterpenes) [PR0107]	--	--	--	--	--	--	626.151	1034.47	1276.1	1687.48	1642.74	1857.62	2094.84	2414.12	916.405	404.808	1638.5	417.331	894.007	444.507	2003.6	945.14	989.243	414.829	781.202	106.473
neg_10078	Alisol A	47.3	59.3	-14.3596	C30H50O5	525.328	8.51702	C17459	--	--	--	--	--	HMDB0248140	--	Organic compounds	Lipids and lipid-like molecules	Prenol lipids	Triterpenoids	24.5052	172.113	256.831	465.039	142.175	301.534	321.215	369.527	99.8368	72.1996	326.287	89.6993	115.832	185.202	312.285	193.889	144.322	38.9282	249.11	32.8024
neg_10080	Isoceanothic acid	44.4	56.4	-34.8926	C30H46O5	531.316	8.51702	--	--	--	--	--	--	--	--	--	--	--	--	1468.12	527.936	1338.43	858.042	513.064	570.364	521.106	885.38	1208.54	1095.28	1218.4	477.808	1577.08	496.788	698.131	760.814	1277.78	734.334	1048.19	740.109
neg_1009	Azoxystrobin acid	42.9	43.1	11.3899	C21H15N3O5	837.225	0.597983	--	--	--	--	--	--	--	--	--	--	--	--	752.847	266.431	485.846	315.037	378.897	346.184	240.045	417.976	825.391	293.061	580.777	377.065	433.254	332.603	530.12	208.274	510.915	140.552	212.821	64.1387
neg_10092	3-Hexaprenyl-4-hydroxybenzoate	44.6	67	7.7683	C37H54O3	591.41	8.53132	C13425	--	--	--	--	--	HMDB0006816	65848-03-5	Organic compounds	Lipids and lipid-like molecules	Prenol lipids	Polyprenylphenols	268.785	684.378	947.777	885.527	456.896	1270.5	1213.47	1851.22	607.458	251.433	263.211	189.29	272.281	261.161	1139.4	593.725	548.557	156.479	541.817	128.981
neg_10095	Tylactone	50.8	66.9	1.46598	C23H38O5	415.247	8.53847	C12000	Metabolic pathways(ko01100);;Biosynthesis of secondary metabolites(ko01110)	--	--	--	--	--	--	--	--	--	--	4.69496	167.329	100.251	69.6529	99.4216	571.329	185.802	957.93	92.7553	43.6024	61.9682	115.308	99.6643	478.858	77.5735	30.5961	128.54	45.7552	145.216	81.0714
neg_10097	12-OxoETE	47.5	50.1	6.55848	C20H30O3	681.441	8.53847	C14807	Arachidonic acid metabolism(ko00590)	--	--	--	--	HMDB0013633	108437-64-5	Organic compounds	Lipids and lipid-like molecules	Fatty Acyls	Fatty acids and conjugates	1.23e-12	29.644	42.0895	28.5177	16.6515	14.4116	1.99878	11.2757	18.4559	15.4539	5.53336	8.69722	5.92381	26.1315	30.8323	3.45423	1.23e-12	7.78409	23.1831	19.9683
neg_10103	L-Valyl-L-Leucine	42.8	26.6	4.15319	C11H22N2O3	519.342	8.55275	--	--	--	--	--	--	HMDB0029131	3989-97-7	Organic compounds	Organic acids and derivatives	Carboxylic acids and derivatives	Amino acids, peptides, and analogues	53.4396	46.6595	71.3762	45.9051	49.2746	94.4526	87.4908	113.506	42.6106	27.6968	40.4751	18.4829	76.2103	98.8673	115.128	62.9732	83.1806	25.8254	60.0971	29.2491
neg_10115	Sugiol	42.8	30.8	8.15638	C20H28O2	645.421	8.58138	C21822	Diterpenoid biosynthesis(ko00904);;Biosynthesis of secondary metabolites(ko01110)	--	--	--	--	HMDB0036564	511-05-7	Organic compounds	Lipids and lipid-like molecules	Prenol lipids	Diterpenoids	1299.23	660.717	696.163	682.457	462.395	563.839	467.667	475.203	961.71	160.389	182.582	109.575	127.649	176.232	319.803	105.587	125.013	75.7557	136.017	95.7891
neg_1012	UDP-N-acetylmuramoyl-L-alanyl-D-glutamate	45.2	68.6	30.3305	C28H43N5O23P2	900.184	0.597983	C00692	D-Amino acid metabolism(ko00470);;Metabolic pathways(ko01100)	--	--	--	--	--	--	--	--	--	--	604.044	541.533	415.705	605.363	571.984	148.517	221.559	301.503	685.712	326.036	613.037	594.882	1063.58	487.534	305.545	237.039	634.075	177.984	204.182	168.686
neg_10120	Echinocystic acid	47.6	86.8	-29.701	C30H48O4	517.339	8.58852	C08942	--	--	--	--	--	HMDB0251690	--	Organic compounds	Lipids and lipid-like molecules	Prenol lipids	Triterpenoids	115.373	22.4165	52.9605	113.998	48.9408	29.4224	70.8092	64.0185	111.547	116.894	58.79	34.936	137.405	65.8468	86.6132	70.1753	113.601	70.5025	81.6728	54.6285
neg_10121	Proscillaridin A	48.7	71.9	-1.17879	C30H42O8	551.262	8.58852	--	--	LMST01130008	Sterol Lipids [ST]	Sterols [ST01]	Bufanolides and derivatives [ST0113]	HMDB0256851	--	Organic compounds	Lipids and lipid-like molecules	Steroids and steroid derivatives	Steroid lactones	417.247	155.964	191.445	233.225	137.612	121.907	113.939	109.775	252.954	139.091	563.051	246.796	489.529	280.59	292.738	200.046	380.852	219.806	252.351	274.729
neg_10126	5-O-beta-D-Mycaminosyltylactone	50	78.1	7.25407	C31H53NO8	1179.76	8.59568	C12001	Metabolic pathways(ko01100);;Biosynthesis of secondary metabolites(ko01110)	--	--	--	--	--	--	--	--	--	--	6.62092	14.9713	8.41383	38.378	1.23e-12	124.539	57.2806	63.5394	105.783	81.5568	1.23e-12	7.48184	45.2548	23.8043	1.23e-12	47.643	179.35	84.4924	35.6557	41.1638
neg_10127	N-Oleoylglycine	45.8	42.2	10.4634	C20H37NO3	384.279	8.60283	--	--	--	--	--	--	HMDB0013631	2601-90-3	Organic compounds	Organic acids and derivatives	Carboxylic acids and derivatives	Amino acids, peptides, and analogues	198.245	453.777	1152.63	333.989	677.456	282.313	279.171	533.651	359.25	299.785	384.463	599.905	545.234	475.607	1124.66	377.701	526.009	202.518	359.489	204.223
neg_10131	Vincoside lactam	44.5	46.3	-16.5377	C26H30N2O8	533.161	8.59568	--	--	--	--	--	--	--	--	--	--	--	--	1009.12	848.02	610.119	713.249	299.394	1230.61	450.159	487.722	751.218	491.555	1114.74	701.11	660.65	984.121	94.8725	493.399	1220.91	453.321	687.969	864.373
neg_10150	Prostaglandin B2	47.7	68.4	-19.1781	C20H30O4	727.43	8.63143	C05954	Arachidonic acid metabolism(ko00590);;Metabolic pathways(ko01100)	LMFA03010018	Fatty Acyls [FA]	Eicosanoids [FA03]	Prostaglandins [FA0301]	HMDB0004236	13367-85-6	Organic compounds	Lipids and lipid-like molecules	Fatty Acyls	Eicosanoids	2220.92	1118.79	1684.74	956.869	1622.99	826.725	1108.63	886.157	1983	964.283	1359.22	1158.84	2259.26	1011.02	1275.63	1532.77	2012.68	1068.49	1353.53	1267.61
neg_10152	Monacolin L acid	49.9	63.6	9.34045	C19H30O4	321.21	8.63858	C20853	Metabolic pathways(ko01100);;Biosynthesis of secondary metabolites(ko01110)	--	--	--	--	--	--	--	--	--	--	4382.49	607.48	1226.56	1040.53	683.37	303.101	222.304	223.951	378.868	223.789	10654.7	2310.63	7249.12	1544.04	455.89	181.821	1500.36	185.283	190.042	219.956
neg_10156	Calcidiol	43.6	31.3	-4.62375	C27H44O2	421.307	8.65288	C01561	Steroid biosynthesis(ko00100);;Metabolic pathways(ko01100);;Biosynthesis of secondary metabolites(ko01110)	--	--	--	--	HMDB0003550	19356-17-3	Organic compounds	Lipids and lipid-like molecules	Steroids and steroid derivatives	Vitamin D and derivatives	0.82833	3.04031	2.33975	28.4392	7.3494	62.077	108.442	146.582	13.2388	47.7555	2.79705	0.396617	2.69117	4.46233	128.753	90.7474	36.9189	1.70983	96.9173	9.0802
neg_1016	1,4-Dihydroxy-2-naphthoyl-CoA	40.3	21.6	8.96791	C32H42N7O19P3S	998.154	0.597983	C15547	Ubiquinone and other terpenoid-quinone biosynthesis(ko00130);;Metabolic pathways(ko01100);;Biosynthesis of secondary metabolites(ko01110);;Biosynthesis of cofactors(ko01240)	--	--	--	--	HMDB0304010	--	Organic compounds	Lipids and lipid-like molecules	Fatty Acyls	Fatty acyl thioesters	238.823	147.669	62.9363	146.624	87.3605	58.1939	77.6361	61.2334	249.608	132.469	253.222	195.174	191.536	122.133	39.9345	75.8384	298.982	42.0704	46.7884	41.9388
neg_10161	Monacolin J acid	44.3	65.2	-37.316	C19H30O5	337.189	8.66002	C20854	Metabolic pathways(ko01100);;Biosynthesis of secondary metabolites(ko01110)	--	--	--	--	--	--	--	--	--	--	329.884	167.506	245.428	221.955	270.362	228.792	97.6758	161.056	190.356	281.651	215.298	131.15	295.531	163.406	173.597	76.0965	282.292	132.91	113.928	142.36
neg_10165	26-Hydroxybrassinolide	46.3	52.6	16.1249	C28H48O7	531.317	8.67433	C19874	Brassinosteroid biosynthesis(ko00905);;Biosynthesis of secondary metabolites(ko01110)	--	--	--	--	--	--	--	--	--	--	6833.68	966.649	1870.2	1820.65	1108.56	1272.84	1244.4	1933.69	4356.44	2340.99	5922.3	1077.2	8548.19	1297.99	2560.04	1979.46	4632.08	1813.7	4336.73	1325.58
neg_10176	Sanguisorbin B	46.5	67.8	8.12266	C35H56O7	609.382	8.68148	--	--	--	--	--	--	HMDB0040524	32180-34-0	Organic compounds	Lipids and lipid-like molecules	Prenol lipids	Triterpenoids	319.319	1021.82	1520	1114.58	2583.03	1294.66	1135.18	1649.91	1127.08	1034.97	2229.19	1429.26	717.15	1583.12	3806.56	1798.16	3780.54	561.792	1215.86	669.987
neg_10194	(9Z)-Octadecenoic acid	42.4	35.2	8.90972	C18H34O2	281.251	8.71723	C00712	Fatty acid biosynthesis(ko00061);;Cutin, suberine and wax biosynthesis(ko00073);;Biosynthesis of unsaturated fatty acids(ko01040)	--	--	--	--	HMDB0000207	112-80-1	Organic compounds	Lipids and lipid-like molecules	Fatty Acyls	Fatty acids and conjugates	1145.49	511.162	482.48	722.605	390.051	694.875	457.544	635.956	970.174	616.765	949.341	611.318	1217.15	543.36	731.162	665.849	850.713	681.925	1047.81	529.135
neg_10203	Jujubogenin	41.6	60.8	-32.2764	C30H48O4	517.338	8.71723	--	--	--	--	--	--	--	--	--	--	--	--	723.427	86.0089	115.956	200.801	92.5482	142.035	159.069	185.696	533.361	376.2	369.557	100.963	439.569	161.488	191.691	228.288	485.428	244.901	372.83	189.87
neg_10207	13,14-Dihydro-15-keto-PGE2	52.1	80.7	13.4459	C20H32O5	397.228	8.73152	--	--	LMFA03010031	Fatty Acyls [FA]	Eicosanoids [FA03]	Prostaglandins [FA0301]	HMDB0002776	363-23-5	Organic compounds	Lipids and lipid-like molecules	Fatty Acyls	Eicosanoids	4493.3	2322.01	2760.35	2152.14	3341.48	2041.06	1579.94	2098.73	3867.01	2337.97	3410.2	2748.82	3348.38	2288.93	3088.48	1518.22	3787.52	2026.69	1709.02	2562.14
neg_10208	Meliasenin E	45.6	50.8	12.6606	C31H48O5	545.355	8.73152	--	--	--	--	--	--	--	--	--	--	--	--	1.23e-12	16.4671	61.4447	27.0811	5.95282	133.791	81.1643	117.903	30.5553	1.23e-12	1.42952	1.23e-12	14.3615	10.8312	69.0375	49.3323	13.6914	4.63552	83.0007	1.23e-12
neg_10210	19-Hydroxytestosterone	48.5	69.4	23.4547	C19H28O3	325.186	8.74512	C05294	Metabolic pathways(ko01100)	--	--	--	--	HMDB0006769	2126-37-6	Organic compounds	Organoheterocyclic compounds	Indoles and derivatives	--	52045.2	24445.7	33083.3	25947.5	36996.7	41607.1	16761.3	22028.9	34449.4	29544	37657.5	26528.9	37522.2	26513.4	34271.9	17059.2	44844.2	20986.8	19926	27914.8
neg_10212	Cholic acid	46	35.8	-1.75368	C24H40O5	407.28	8.75228	C00695	Metabolic pathways(ko01100)	LMST04010001	Sterol Lipids [ST]	Bile acids and derivatives [ST04]	C24 bile acids, alcohols, and derivatives [ST0401]	HMDB0000619	81-25-4	Organic compounds	Lipids and lipid-like molecules	Steroids and steroid derivatives	Bile acids, alcohols and derivatives	18.2672	3.53008	16.2257	1.09738	2.69963	0.167109	0.642056	7.87545	17.0933	1.75349	121.706	32.935	4.90305	4.13246	9.58265	1.08417	5.02586	0.180381	3.98464	1.16354
neg_10214	Semialactone	47.5	62.6	8.6945	C30H44O4	503.297	8.74512	--	--	--	--	--	--	--	--	--	--	--	--	165.283	99.9031	93.2327	81.398	127.598	89.4627	108.483	123.844	134.565	77.6899	138.462	110.581	132.741	162.162	139.963	119.157	184.441	84.5986	117.156	73.0105
neg_10217	26-Hydroxycastasterone	43.9	61.5	26.3686	C28H48O6	501.332	8.75942	C19873	Brassinosteroid biosynthesis(ko00905)	--	--	--	--	--	--	--	--	--	--	26.2783	236.344	399.101	302.114	190.443	344.198	232.785	453.065	136.018	79.2578	19.6642	86.7935	263.609	200.899	579.302	206.449	124.382	53.7286	386.935	14.2268
neg_10226	Feruloylspermidine	40.1	8.8	4.55401	C17H27N3O3	641.406	8.76657	--	--	--	--	--	--	--	--	--	--	--	--	96.0663	79.4538	113.249	71.0283	147.04	110.721	42.5738	61.249	30.4588	17.9869	208.567	39.4134	69.6052	72.8511	29.5774	4.25357	15.1989	22.3115	16.3448	10.6982
neg_10232	Kadcoccinone C	46.3	48.8	-10.1838	C32H48O6	573.338	8.78802	--	--	--	--	--	--	--	--	--	--	--	--	0.336509	206.086	245.639	291.715	221.09	470.878	404.342	629.62	134.358	12.3456	4.99678	35.3084	73.8772	205.401	463.174	175.276	55.0497	11.8572	202.988	8.51199
neg_10236	6-Deoxyerythronolide B	51.3	69.4	-3.3437	C21H38O6	421.235	8.80232	C03240	Metabolic pathways(ko01100);;Biosynthesis of secondary metabolites(ko01110)	LMPK04000002	Polyketides [PK]	Macrolides and lactone polyketides [PK04]	--	--	--	--	--	--	--	6008.37	1786.1	3508.64	1677.13	1985.92	3341.42	1677.67	2196.83	3385.38	2372.64	4690.09	2597.47	3325.83	2600.67	1745.16	828.266	3138.82	1307.25	1836.47	1758.57
neg_10240	3alpha,11beta,21-Trihydroxy-5beta-pregnan-20-one	50.1	66	12.8506	C21H34O4	371.225	8.80947	--	--	--	--	--	--	HMDB0000268	68-42-8	Organic compounds	Lipids and lipid-like molecules	Steroids and steroid derivatives	Hydroxysteroids	1.10993	33.6996	0.123693	4.96775	9.49891	43.0101	247.838	8.61952	112.444	2.75875	10.1836	2.89373	2.84465	24.8512	0.229525	57.6235	2.30163	682.059	5.62737	0.151644
neg_10242	iridal	42.7	33.1	-6.14279	C30H50O3	479.348	8.80947	--	--	--	--	--	--	HMDB0253581	--	Organic compounds	Lipids and lipid-like molecules	Prenol lipids	Sesterterpenoids	261.537	597.954	656.097	1048.41	372.432	1279.09	1504.49	2197.3	707.737	454.585	192.752	234.587	447.776	292.088	1379.61	1098.75	885.135	277.63	917.534	213.32
neg_10245	Ile-His	44.3	32.9	-2.31526	C12H20N4O3	581.304	8.82377	--	--	--	--	--	--	HMDB0028909	--	Organic compounds	Organic acids and derivatives	Carboxylic acids and derivatives	Amino acids, peptides, and analogues	452.384	129.538	186.006	347.474	162.999	182.349	138.712	226.439	374.552	372.221	635.912	109.209	432.566	175.476	111.217	145.241	529.551	120.592	270.191	75.7858
neg_10247	12,13-DHOME; (9Z)-12,13-Dihydroxyoctadec-9-enoic acid	41.6	18.7	-6.79224	C18H34O4	627.48	8.82377	--	--	--	--	--	--	--	--	--	--	--	--	146.943	234.443	525.472	440.019	325.056	196.829	228.31	493.43	148.608	127.112	1223.39	245.766	388.23	420.729	423.626	368.123	664.105	309.303	170.98	645.256
neg_1025	3-Feruloyl-4-caffeoylquinic acid	49.3	83	14.9223	C26H26O12	1105.3	0.605117	--	--	--	--	--	--	--	--	--	--	--	--	1656.68	3584.39	6458.87	5385.84	5089.62	1347.65	1392.06	2859.73	1580.2	671.824	1193.04	1965.41	3091.1	1424.72	7843.4	665.957	926.768	462.28	550.516	156.187
neg_10252	16-Hydroxypalmitate	40.7	15.9	7.39158	C16H32O3	271.23	8.83807	C18218	Cutin, suberine and wax biosynthesis(ko00073);;Metabolic pathways(ko01100)	--	--	--	--	HMDB0006294	506-13-8	Organic compounds	Lipids and lipid-like molecules	Fatty Acyls	Fatty acids and conjugates	1541.01	820.25	1397.42	797.046	1361.45	685.452	979.906	1047.2	1019.74	1165.33	2221.81	1396.03	1682.51	1354.39	1156.55	831.037	1762.52	913.473	722.686	709.937
neg_10258	Dubione B	44.8	86.2	23.6917	C30H44O4	489.31	8.84522	--	--	--	--	--	--	--	--	--	--	--	--	1937.41	1715.09	2053.29	2083.68	2727.32	1716.17	2227.21	1949.29	2446.91	2024.27	2047.24	1733.46	2497.46	2573.59	2976.97	2030.07	2722.11	1642.27	2505.33	1370.59
neg_10261	Avermectin A1b aglycone	50.8	63.1	4.19016	C34H48O8	605.312	8.84522	C11964	Metabolic pathways(ko01100);;Biosynthesis of secondary metabolites(ko01110)	--	--	--	--	--	--	--	--	--	--	570.185	0.100835	3.14041	5.88332	4.04958	18.9868	31.0201	3.14366	0.862328	2.69803	5119.94	96.3206	2185.81	254.015	12.6033	1.42635	153.06	11.8935	4.94098	3.23783
neg_10270	18α-GLYCYRRHETINIC ACID	40.1	21.5	-4.53304	C30H46O4	469.33	8.87382	--	--	LMPR0106150026	Prenol Lipids [PR]	Isoprenoids [PR01]	C30 isoprenoids (triterpenes) [PR0106]	HMDB0034517	1449-05-4	Organic compounds	Lipids and lipid-like molecules	Prenol lipids	Triterpenoids	105.852	236.593	325.142	316.619	178.974	416.2	386.653	578.305	322.186	193.353	146.071	114.559	237.439	276.189	349.897	324.766	425.712	128.479	468.764	120.069
neg_10274	Podocarpic acid	40.7	7.39	0.564898	C17H22O3	593.312	8.86667	C09171	--	LMPR0104120002	Prenol Lipids [PR]	Isoprenoids [PR01]	C20 isoprenoids (diterpenes) [PR0104]	--	--	--	--	--	--	1.23e-12	232.501	230.343	357.055	232.571	1.23e-12	9.10662	1.23e-12	1.23e-12	9.16601	313.554	96.0772	5.6954	40.9157	1.23e-12	71.7932	1.23e-12	1.23e-12	1.23e-12	1.23e-12
neg_10279	22alpha-Hydroxy-campest-4-en-3-one	50.2	59.6	-2.71492	C28H46O2	435.323	8.88097	C15796	Brassinosteroid biosynthesis(ko00905);;Metabolic pathways(ko01100);;Biosynthesis of secondary metabolites(ko01110)	--	--	--	--	HMDB0012113	208586-81-6	Organic compounds	Lipids and lipid-like molecules	Steroids and steroid derivatives	Bile acids, alcohols and derivatives	40.7765	1040.55	871.228	1763.52	368.208	4517.28	4478.13	5879.32	1320.38	655.869	20.4651	230.792	532.731	264.477	1769.1	2498.4	1836.59	264.57	2470.63	103.323
neg_10280	Soyasapogenol B	43	42.4	-7.86657	C30H50O3	479.347	8.88097	C08980	--	--	--	--	--	HMDB0034648	595-15-3	Organic compounds	Lipids and lipid-like molecules	Prenol lipids	Triterpenoids	2769.87	3791.73	4588.25	5813.56	3348.7	8492.07	9036.78	12379.1	5083.28	3169.04	2501.13	2269.93	3381.76	2790.04	8225.76	6617.91	5958.93	2203.27	5864.85	1711.16
neg_10288	Ricinoleic acid	51.4	68.2	5.964	C18H34O3	297.245	8.88812	C08365	--	LMFA02000184	Fatty Acyls [FA]	Octadecanoids [FA02]	Other Octadecanoids [FA0200]	HMDB0034297	141-22-0	Organic compounds	Lipids and lipid-like molecules	Fatty Acyls	Fatty acids and conjugates	1484.54	2158.58	2538.33	3505.54	2062.87	927.769	1026.29	833.294	993.51	2429.36	2845.24	1263.8	1772.25	3223.66	1141.59	2642.08	2307.17	1466.28	703.25	1341.27
neg_10292	Retinoate	43.5	44.9	6.26163	C20H28O2	659.435	8.88812	C00777	Metabolic pathways(ko01100)	--	--	--	--	HMDB0001852	302-79-4	Organic compounds	Lipids and lipid-like molecules	Prenol lipids	Retinoids	173.816	310.832	375.284	420.863	347.86	300.903	226.595	377.853	180.273	156.636	178.091	108.953	164.136	375.15	318.876	367.019	274.172	99.7751	116.207	192.921
neg_10293	Lysyl-Tryptophan	45.1	34.7	-5.84561	C17H24N4O3	723.38	8.88812	--	--	--	--	--	--	HMDB0028962	50674-18-5	Organic compounds	Organic acids and derivatives	Carboxylic acids and derivatives	Amino acids, peptides, and analogues	16.6336	702.811	42.943	1363.04	88.7885	30.7563	33.0215	52.7351	41.496	18.2051	9.74399	30.7557	23.6308	22.4814	0.829617	62.6453	1.78768	53.1505	1.23e-12	1.23e-12
neg_10303	Confertifoline	45.1	69.3	22.0914	C15H22O2	513.333	8.90957	--	--	--	--	--	--	--	--	--	--	--	--	532.131	1290.94	1464.32	2053.01	1255.56	2471.59	3457.65	4944.77	1988.28	1148.18	697.718	652.951	810.386	1176.4	3880.61	2546.4	2531.96	801.705	2341.43	640.158
neg_10304	Xanthoxin	40.6	56.3	37.9789	C15H22O3	559.347	8.90957	C13453	Carotenoid biosynthesis(ko00906);;Metabolic pathways(ko01100);;Biosynthesis of secondary metabolites(ko01110)	--	--	--	--	HMDB0014693	298-81-7	Organic compounds	Phenylpropanoids and polyketides	Coumarins and derivatives	Furanocoumarins	84.6116	120.101	203.859	169.471	136.023	241.335	227.472	215.958	106.666	76.4116	28.846	147.817	64.69	195.562	240.861	125.686	142.308	21.8748	98.3345	36.8367
neg_10313	Diosgenin	46.4	47.5	-2.68577	C27H42O3	459.31	8.92387	C08898	--	LMST01080037	Sterol Lipids [ST]	Sterols [ST01]	Spirostanols and derivatives [ST0108]	HMDB0242671	--	Organic compounds	Lipids and lipid-like molecules	Prenol lipids	Triterpenoids	1442.79	678.179	760.995	1026.06	1150.39	632.063	1103.12	645.281	1878.09	1101.71	2378.94	1226.96	823.219	1195.03	628.828	679.529	2067.37	777.064	494.634	966.897
neg_10317	Astaxanthin	46.4	68.1	14.6113	C40H52O4	595.388	8.92387	C08580	Carotenoid biosynthesis(ko00906);;Biosynthesis of secondary metabolites(ko01110)	LMPR01070263	Prenol Lipids [PR]	Isoprenoids [PR01]	C40 isoprenoids (tetraterpenes) [PR0107]	HMDB0002204	472-61-7	Organic compounds	Lipids and lipid-like molecules	Prenol lipids	Tetraterpenoids	0.322274	133.662	348.577	222.385	132.348	26.6665	57.0186	94.3009	8.45653	0.583759	0.706599	29.9022	63.0908	80.5959	314.631	6.27496	9.86483	2.54032	35.8879	3.86e-06
neg_10330	Communic Acid	40.7	21.1	9.87866	C20H30O2	347.226	8.95247	--	--	--	--	--	--	--	--	--	--	--	--	205.227	5.31572	25.1424	1.23e-12	4.44691	1.23e-12	1.23e-12	1.23e-12	1.23e-12	1.23e-12	453.052	85.4288	251.154	94.8865	2.97847	1.23e-12	29.9622	1.23e-12	1.23e-12	1.23e-12
neg_10341	Sphingomyelin	46.5	77.9	-35.1276	C41H84N2O8P+	784.544	8.96677	C00550	Sphingolipid metabolism(ko00600);;Metabolic pathways(ko01100)	--	--	--	--	HMDB0001348	58909-84-5	Organic compounds	Lipids and lipid-like molecules	Sphingolipids	Phosphosphingolipids	16857.1	2421.52	2671.72	4197.41	8345.55	2804.58	2687.42	1004.66	3029.96	3707.5	5400.87	2331.77	2352.24	3855.73	4260.04	2585.7	5089.94	2909.59	1982.33	2545.55
neg_10344	2(R)-HOT	47.3	60.6	15.8279	C18H30O3	633.447	8.98107	C16342	alpha-Linolenic acid metabolism(ko00592)	--	--	--	--	--	--	--	--	--	--	13.527	52.0206	72.9498	97.447	50.3344	63.3592	34.4574	73.1234	23.3561	2.4384	37.4757	4.91555	17.3319	8.78018	57.9399	22.7016	18.118	2.99316	6.42173	6.88664
neg_10345	16,16-dimethyl-PGA1	46	48.2	11.9495	C22H36O4	385.24	8.98822	--	--	LMFA03010085	Fatty Acyls [FA]	Eicosanoids [FA03]	Prostaglandins [FA0301]	--	--	--	--	--	--	304.915	160.96	139.635	6.85779	164.216	0.781188	2.74094	2.82672	9.62766	1.23e-12	1271.19	572.463	305.383	298.903	24.6082	0.524679	310.976	1.23e-12	0.639796	1.23e-12
neg_10349	Ginsenoside Rh2	51.6	77.9	-10.2691	C36H62O8	667.436	8.98822	--	--	LMPR0106080018	Prenol Lipids [PR]	Isoprenoids [PR01]	C30 isoprenoids (triterpenes) [PR0106]	HMDB0039544	78214-33-2	Organic compounds	Lipids and lipid-like molecules	Prenol lipids	Triterpenoids	2488.27	2545.12	3839.37	3770.24	3170.87	1451.12	1474.34	2314.43	1999.82	1110.27	965.456	2084.56	1973.75	1529.87	3296.63	612.735	884.376	1342.73	800.947	1352.95
neg_10352	Camelliol C	41.3	40.3	-22.8139	C30H50O	471.38	8.99537	C19835	Sesquiterpenoid and triterpenoid biosynthesis(ko00909)	--	--	--	--	HMDB0033195	220359-76-2	Organic compounds	Lipids and lipid-like molecules	Prenol lipids	Triterpenoids	701.217	707.699	847.793	533.71	1062.5	556.602	572.425	494.326	1110.27	482.924	1029.3	958.817	1449.76	1060.77	879.409	578.353	1337.09	613.984	681.074	975.454
neg_10361	Torulene	40.1	40.3	-35.2001	C40H54	555.378	9.00967	C08613	Carotenoid biosynthesis(ko00906);;Metabolic pathways(ko01100);;Biosynthesis of secondary metabolites(ko01110)	LMPR01070088	Prenol Lipids [PR]	Isoprenoids [PR01]	C40 isoprenoids (tetraterpenes) [PR0107]	HMDB0304501	--	Organic compounds	Lipids and lipid-like molecules	Prenol lipids	Tetraterpenoids	161.112	1409.15	2759.14	2004.05	1715.03	1089.8	1588.38	2415.94	567.68	266.346	141.08	601.524	750.247	680.348	3715.7	814.625	687.601	248.426	702.093	220.678
neg_10364	(3S,6R)-6-Isopropenyl-3-methyl-2-oxo-oxepanone	41.3	23.1	9.05628	C10H16O2	395.247	9.01682	C11403	Limonene and pinene degradation(ko00903)	--	--	--	--	--	--	--	--	--	--	112.754	75.6486	108.259	62.334	107.437	78.5996	66.4279	89.8488	99.6305	102.272	51.6839	86.8608	85.9514	96.3914	118.046	70.9681	193.935	63.4414	76.2275	58.9352
neg_1037	Mesaconate	42.4	29.7	11.5565	C5H6O4	129.021	0.612267	C01732	Glyoxylate and dicarboxylate metabolism(ko00630);;C5-Branched dibasic acid metabolism(ko00660);;Metabolic pathways(ko01100);;Carbon metabolism(ko01200)	--	--	--	--	HMDB0000749	498-24-8	Organic compounds	Lipids and lipid-like molecules	Fatty Acyls	Fatty acids and conjugates	6071.95	2746.34	1870.23	3838.51	3352.99	1153.32	1765.9	1245.79	4275.86	2180	2251.21	2667.81	5939.24	3368.16	5719.17	890.596	2729.77	1192.77	1340.49	2007.24
neg_10387	15(S)-HpETE	43.3	23.6	4.85413	C20H32O4	335.224	9.03827	C05966	Arachidonic acid metabolism(ko00590);;Metabolic pathways(ko01100)	--	--	--	--	HMDB0004244	70981-96-3	Organic compounds	Lipids and lipid-like molecules	Fatty Acyls	Eicosanoids	294944	8419.9	12164.4	9954.11	12606.5	1486.15	635.469	1083.49	10622.5	991.737	511364	73484.7	310385	68362.3	6149.48	1120.04	64479.3	780.32	454.428	583.364
neg_10388	Spermidine	40.9	26.6	4.81317	C7H19N3	335.315	9.03827	C00315	Arginine and proline metabolism(ko00330);;beta-Alanine metabolism(ko00410);;Glutathione metabolism(ko00480);;Phenylpropanoid biosynthesis(ko00940);;Metabolic pathways(ko01100);;ABC transporters(ko02010)	--	--	--	--	HMDB0001257	124-20-9	Organic compounds	Organic nitrogen compounds	Organonitrogen compounds	Amines	9270.76	1.23e-12	1.23e-12	1.23e-12	1.23e-12	1.23e-12	1.23e-12	1.23e-12	1.23e-12	1.23e-12	22405.3	475.187	10547.2	406.006	1.23e-12	1.23e-12	29.254	1.23e-12	1.23e-12	1.23e-12
neg_1039	Propanoyl phosphate	43.5	30.9	9.53804	C3H7O5P	152.997	0.605117	C02876	Propanoate metabolism(ko00640);;C5-Branched dibasic acid metabolism(ko00660);;Metabolic pathways(ko01100)	--	--	--	--	--	--	--	--	--	--	140.483	94.027	83.7794	65.9468	66.1882	169.274	157.507	275.062	172.276	118.308	287.725	132.386	134.013	115.816	58.6962	527.02	382.974	409.383	599.399	358.404
neg_1041	Caffeic aldehyde	45.6	43.4	10.4255	C9H8O3	209.032	0.612267	C10945	Phenylpropanoid biosynthesis(ko00940);;Biosynthesis of secondary metabolites(ko01110)	--	--	--	--	--	--	--	--	--	--	3009.08	1175.31	792.502	751.75	1121.74	1935.91	1457.85	2589.53	4267.43	2680.8	2945.61	1441.82	1144.73	1497.67	560.661	2138.08	4036.15	2784.56	3206.29	2871.25
neg_10415	Acetylcholine	41.6	35.7	19.8003	C7H16NO2+	291.235	9.04542	C01996	Glycerophospholipid metabolism(ko00564)	--	--	--	--	HMDB0000895	51-84-3	Organic compounds	Organic nitrogen compounds	Organonitrogen compounds	Quaternary ammonium salts	10112.7	352.197	451.936	492.836	392.065	37.4584	21.9235	28.7598	364.268	41.2547	19855.6	2953.82	14055.4	2851.34	184.934	67.5133	1888.12	66.3297	21.1723	2.81541
neg_1042	(S)-3-Sulfolactate	41.2	29.5	14.4069	C3H6O6S	168.984	0.605117	C11499	Cysteine and methionine metabolism(ko00270);;Metabolic pathways(ko01100)	--	--	--	--	HMDB0060176	--	Organic compounds	Organic acids and derivatives	Hydroxy acids and derivatives	Alpha hydroxy acids and derivatives	517.062	160.02	124.013	164.787	131.911	87.5498	120.563	89.9907	238.902	191.666	592.598	265.368	311.923	312.882	84.7685	199.35	562.535	372.509	215.421	1110.49
neg_10423	3alpha,7alpha,12alpha-Trihydroxy-5beta-cholestanoate	48.9	63.7	7.50386	C27H46O5	471.313	9.05257	C04722	Metabolic pathways(ko01100)	LMST04030001	Sterol Lipids [ST]	Bile acids and derivatives [ST04]	C27 bile acids, alcohols, and derivatives [ST0403]	HMDB0000601	547-98-8	Organic compounds	Lipids and lipid-like molecules	Steroids and steroid derivatives	Bile acids, alcohols and derivatives	1248.71	574.089	690.314	865.408	941.251	610.748	1008.34	681.456	1174.01	969.351	2063.37	1235.78	773.754	947.496	423.723	770.561	1831.53	887.178	507.044	923.689
neg_10426	Pristimerin	45.8	43.2	-3.08269	C30H40O4	509.289	9.04542	C08633	--	--	--	--	--	HMDB0256776	--	Organic compounds	Lipids and lipid-like molecules	Prenol lipids	Triterpenoids	7370	3727.65	7839.99	7036.29	3843.4	4351.08	6245.1	6496.16	5933.28	5276.59	6385.57	4927.58	8168.69	4048.15	5223.89	6103.92	8095.15	5936.53	7068.23	4978.93
neg_1043	Gluconolactone	44.3	33.5	9.13589	C6H10O6	177.042	0.612267	C00198	Pentose phosphate pathway(ko00030);;Metabolic pathways(ko01100);;Biosynthesis of secondary metabolites(ko01110);;Carbon metabolism(ko01200)	--	--	--	--	HMDB0000150	90-80-2	Organic compounds	Organic oxygen compounds	Organooxygen compounds	Carbohydrates and carbohydrate conjugates	1804	1076.66	747.973	1674.95	1459.78	397.956	656.542	419.675	1210.13	789.629	759.244	1059.15	2367.22	1316.94	2793.79	207.345	774.513	295.738	398.767	555.783
neg_10433	(4R,7S)-7-Isopropyl-4-methyloxepan-2-one	41.3	14.6	5.73624	C10H18O2	399.277	9.05972	C18027	Monoterpenoid biosynthesis(ko00902);;Biosynthesis of secondary metabolites(ko01110)	LMPR0102090054	Prenol Lipids [PR]	Isoprenoids [PR01]	C10 isoprenoids (monoterpenes) [PR0102]	--	--	--	--	--	--	5.73725	80.5029	55.669	92.3027	54.0323	74.7432	57.2597	87.0345	42.0776	189.383	5.88866	39.9636	31.9033	62.9708	37.0371	84.1725	136.508	123.207	52.5185	136.933
neg_10439	Phytosphingosine	42.6	38.3	7.49664	C18H39NO3	338.27	9.06687	C12144	Sphingolipid metabolism(ko00600);;Metabolic pathways(ko01100)	LMSP01030001	Sphingolipids [SP]	Sphingoid bases [SP01]	4-Hydroxysphinganines (Phytosphingosines) [SP0103]	HMDB0004610	554-62-1	Organic compounds	Organic nitrogen compounds	Organonitrogen compounds	Amines	27.2379	15.9096	30.9702	17.763	18.3273	9.64325	7.7291	12.9013	3.3123	3.90926	58.5184	36.8243	37.2118	27.9075	48.4997	14.3241	42.7967	12.1977	26.9654	57.5097
neg_10451	14,15-dehydroajugareptansin	41.3	31.6	-11.7855	C29H42O10	549.264	9.08045	--	--	--	--	--	--	--	--	--	--	--	--	1.23e-12	50.1145	62.2894	133.598	26.1075	361.05	403.91	512.431	66.6564	31.4099	4.64905	8.73663	17.6873	10.2913	162.805	184.124	88.8086	4.8521	108.771	1.23e-12
neg_10454	Hydroxyspheroidene	45.5	50.2	10.2413	C41H62O2	607.456	9.08045	C15902	Carotenoid biosynthesis(ko00906);;Metabolic pathways(ko01100);;Biosynthesis of secondary metabolites(ko01110)	--	--	--	--	--	--	--	--	--	--	876.294	1570.51	3086.23	2608.25	2112.65	381.55	347.806	548.771	485.109	481.976	4309.58	921.735	1514.29	1609.21	714.574	854.248	1986.53	843.858	476.953	1197.14
neg_10460	2-hydroxyhexadecanoic acid	48.2	53	7.21205	C16H32O3	271.23	9.08758	--	--	--	--	--	--	HMDB0031057	16452-52-1	Organic compounds	Lipids and lipid-like molecules	Fatty Acyls	Fatty acids and conjugates	4683.08	3751.96	4205.15	2842.59	5479.88	2202.45	2714.79	2381.32	7281.87	5854.56	7021.95	3548.02	9580.1	4977.56	2911.76	2242.46	8021.25	3496.15	2032.77	3408.95
neg_10463	4alpha-Methyl-5alpha-ergosta-8,14,24(28)-trien-3beta-ol	46.8	70	-21.1663	C29H46O	445.316	9.08758	C11508	Steroid biosynthesis(ko00100);;Metabolic pathways(ko01100);;Biosynthesis of secondary metabolites(ko01110)	LMST01031020	Sterol Lipids [ST]	Sterols [ST01]	Ergosterols and C24-methyl derivatives [ST0103]	HMDB0304204	--	Organic compounds	Lipids and lipid-like molecules	Steroids and steroid derivatives	Ergostane steroids	314.664	1364.93	3492.24	1018.65	2654.42	369.291	284.161	498.545	302.65	319.081	659.38	1926.7	2132.34	1417.58	3108.36	455.803	967.146	415.758	658.688	238.655
neg_10464	Meliasenin D	42.7	61.2	33.664	C30H44O5	483.328	9.08758	--	--	--	--	--	--	--	--	--	--	--	--	1.23e-12	147.13	247.272	241.108	89.7864	778.686	582.576	918.725	1.23e-12	1.23e-12	1.23e-12	1.23e-12	49.3023	21.8022	509.265	210.427	78.4497	1.23e-12	271.209	1.23e-12
neg_10465	LysoPE 17:0	43.9	47.7	4.50555	C22H46NO7P	502.273	9.08758	--	--	--	--	--	--	--	--	--	--	--	--	1.23e-12	16.5979	79.3526	14.441	60.8925	0.410743	3.08222	4.72406	1.23e-12	1.23e-12	12.9782	34.9784	29.4923	31.0956	80.7205	8.74902	9.75766	2.71478	4.14612	1.23e-12
neg_10469	Antheraxanthin	43.8	60.9	25.9588	C40H56O3	629.436	9.1019	C08579	Carotenoid biosynthesis(ko00906);;Metabolic pathways(ko01100);;Biosynthesis of secondary metabolites(ko01110)	LMPR01070262	Prenol Lipids [PR]	Isoprenoids [PR01]	C40 isoprenoids (tetraterpenes) [PR0107]	--	--	--	--	--	--	346.419	151.327	207.327	160.339	77.1857	339.758	118.468	362.681	195.142	79.3975	351.31	129.729	313.649	167.563	358.032	160.069	444.95	199.41	167.866	102.34
neg_10471	Hexadecanoic acid	52.9	85.1	17.6303	C16H32O2	277.219	9.10905	C00249	Fatty acid biosynthesis(ko00061);;Fatty acid elongation(ko00062);;Fatty acid degradation(ko00071);;Cutin, suberine and wax biosynthesis(ko00073);;Biosynthesis of unsaturated fatty acids(ko01040);;Metabolic pathways(ko01100);;Fatty acid metabolism(ko01212)	LMFA01010001	Fatty Acyls [FA]	Fatty Acids and Conjugates [FA01]	Straight chain fatty acids [FA0101]	HMDB0000220	1957-10-03	Organic compounds	Lipids and lipid-like molecules	Fatty Acyls	Fatty acids and conjugates	846.076	834.103	1102.77	713.662	1245.62	728.615	1248.84	1009.65	2044.98	2749.87	2202.12	1584.97	2053.91	1698.62	1328.86	1578.92	5776.95	2431.72	1630.75	1684.88
neg_10477	1-Hydroxybisabola-2,10-dien-4-one	41.6	30.1	-14.8368	C15H24O2	517.346	9.10905	--	--	--	--	--	--	--	--	--	--	--	--	91.1551	470.055	865.922	633.248	600.498	578.348	570.458	735.303	455.294	351.636	107.036	347.915	403.859	387.345	864.045	369.173	360.801	146.039	394.301	103.579
neg_10487	17alpha-Hydroxypregnenolone	41.3	20.1	9.49654	C21H32O3	377.236	9.1162	C05138	Metabolic pathways(ko01100)	LMST02030089	Sterol Lipids [ST]	Steroids [ST02]	C21 steroids (gluco/mineralocorticoids, progestogins) and derivatives [ST0203]	HMDB0000363	387-79-1	Organic compounds	Lipids and lipid-like molecules	Steroids and steroid derivatives	Pregnane steroids	4097.16	260.243	296.439	226.138	360.198	86.2462	85.1146	109.877	381.745	217.49	10094.9	1105.46	5780.1	1548.07	202.702	81.607	1200.03	97.8377	82.5267	166.609
neg_10488	Taxa-4(20),11(12)-dien-5alpha-ol	43.4	29.2	6.06034	C20H32O	333.245	9.1162	C11895	Diterpenoid biosynthesis(ko00904);;Metabolic pathways(ko01100);;Biosynthesis of secondary metabolites(ko01110)	LMPR0104390003	Prenol Lipids [PR]	Isoprenoids [PR01]	C20 isoprenoids (diterpenes) [PR0104]	--	--	--	--	--	--	154.504	1.23e-12	1.23e-12	1.23e-12	1.23e-12	1.23e-12	1.23e-12	1.23e-12	5.38034	1.23e-12	475.767	29.8233	237.215	66.8986	1.23e-12	1.23e-12	38.9886	1.23e-12	1.23e-12	1.23e-12
neg_10493	Cathasterone	48.4	84.6	37.8902	C28H48O3	467.346	9.12333	C15790	Brassinosteroid biosynthesis(ko00905);;Metabolic pathways(ko01100);;Biosynthesis of secondary metabolites(ko01110)	LMST01030132	Sterol Lipids [ST]	Sterols [ST01]	Ergosterols and C24-methyl derivatives [ST0103]	HMDB0304285	--	Organic compounds	Lipids and lipid-like molecules	Steroids and steroid derivatives	Bile acids, alcohols and derivatives	162.812	423.818	700.78	717.687	450.141	1646.38	1483.31	2356.68	791.797	823.567	507.715	303.957	575.88	985.901	1132.15	1574.02	1422	454.436	2009.85	647.729
neg_1050	Methyl beta-D-galactoside	50.1	61.4	7.98954	C7H14O6	239.079	0.605117	C03619	ABC transporters(ko02010)	--	--	--	--	HMDB0246173	--	Organic compounds	Organic oxygen compounds	Organooxygen compounds	Carbohydrates and carbohydrate conjugates	3333.54	775.652	843.027	608.962	1053.94	773.985	750.145	1210.92	2184.63	1821.14	2984.85	1827.51	2585.25	1106.11	642.057	1135.68	3605.32	1633.81	1608.34	1379.06
neg_1051	D-Lombricine	45.5	49.5	11.9206	C6H15N4O6P	539.138	0.605117	C01726	D-Amino acid metabolism(ko00470);;Metabolic pathways(ko01100)	--	--	--	--	--	--	--	--	--	--	22051.1	16427.4	25475.7	14290.6	32434.6	14272.4	9515.96	15439.5	15035.5	7899.32	11283	12985	23899.2	12022.9	31712.7	3349.01	9150.6	2949.77	4097.52	2151.08
neg_10513	Stigmasta-4,22-Dien-3-One	43.3	35.4	-10.9521	C29H46O	455.349	9.15195	--	--	--	--	--	--	--	--	--	--	--	--	338.922	1219.74	1567.2	2117.56	838.681	3595.74	3438.75	6326.55	2561.88	1306.43	318.426	471.586	930.945	953.122	3214.06	3346.45	2227.36	629.435	3752.66	455.431
neg_10528	Pregnanolone	42.6	41.9	7.02844	C21H34O2	317.251	9.1734	C05480	Metabolic pathways(ko01100)	LMST02030175	Sterol Lipids [ST]	Steroids [ST02]	C21 steroids (gluco/mineralocorticoids, progestogins) and derivatives [ST0203]	HMDB0062782	128-20-1	Organic compounds	Lipids and lipid-like molecules	Steroids and steroid derivatives	Pregnane steroids	75.1517	1.23e-12	1.23e-12	1.23e-12	1.23e-12	1.23e-12	1.23e-12	1.23e-12	1.23e-12	1.23e-12	161.857	16.883	35.664	2.66656	1.23e-12	1.23e-12	16.2024	1.23e-12	1.23e-12	1.23e-12
neg_10532	5(S)-HPETE	46.2	48.3	11.4324	C20H32O4	357.209	9.16625	C05356	Arachidonic acid metabolism(ko00590);;Metabolic pathways(ko01100)	--	--	--	--	HMDB0011135	74581-83-2	Organic compounds	Lipids and lipid-like molecules	Fatty Acyls	Eicosanoids	181.936	17698.6	2419.96	2188.96	10762.8	154.138	101.979	767.181	54.106	35.4922	698.271	1563.33	787.84	487.434	55.1807	704.12	114.86	16746.4	3084.43	342.108
neg_10533	10beta,14beta-Dihydroxytaxa-4(20),11-dien-5alpha-yl acetate	44.3	41.1	4.72767	C22H34O4	361.24	9.1734	C20151	Diterpenoid biosynthesis(ko00904);;Biosynthesis of secondary metabolites(ko01110)	--	--	--	--	--	--	--	--	--	--	2454.25	348.44	250.86	82.6044	123.016	79.307	21.5263	28.3778	49.6577	63.8125	5333.34	694.591	1363.94	437.546	29.7508	56.5889	1056.17	43.5052	50.5776	7.17905
neg_10537	PA(18:2/0:0)	46.4	49.8	-9.83055	C21H37O7P-2	453.198	9.16625	--	--	--	--	--	--	--	--	--	--	--	--	57.1758	79.1781	39.9312	75.9078	57.6538	32.6132	22.0917	43.0424	31.73	73.0769	110.243	22.0991	51.6334	59.8504	13.7529	60.6151	95.5042	100.763	28.7451	72.7292
neg_10538	3,16-Dihydroxylanosta-7,24-dien-21-oic acid Gamma-lactone (Kulolactone)	42.3	66.8	37.242	C30H46O3	489.331	9.16625	--	--	--	--	--	--	--	--	--	--	--	--	744.22	940.639	1181.96	1238.89	1225.58	1116.47	1498.07	1950.97	1628.99	1051.61	959.116	787.732	951.721	1329.09	1956.07	1313.69	1757.01	729.659	1248.53	830.482
neg_1054	p-Hydroxybenzyldesulphoglucosinolate	41.6	26.1	-4.81521	C14H19NO7S	344.079	0.612267	C17240	Glucosinolate biosynthesis(ko00966);;2-Oxocarboxylic acid metabolism(ko01210)	--	--	--	--	--	--	--	--	--	--	391.128	75.4873	72.6919	28.0011	60.0274	20.1612	17.5506	32.0174	169.423	72.2181	1122.61	124.345	217.533	204.561	14.5742	26.9625	353.322	55.4401	25.5361	100.077
neg_10550	Oleamide (9-Octadecenamide)	42.5	41.3	6.53881	C18H35NO	326.272	9.18055	--	--	--	--	--	--	--	--	--	--	--	--	1706.92	1510.8	3296.76	1476.55	2119.2	1135.68	1194.87	1071.33	2569.15	3352.03	3352.06	2265.62	3841.08	4119.11	3547.19	1239.1	4229.71	1007.16	1149.19	826.308
neg_10557	lanceotoxin B	41.6	23.4	-6.80694	C32H44O11	603.277	9.18055	C08873	--	--	--	--	--	--	--	--	--	--	--	2.80073	1.91887	13.2878	34.4542	1.23e-12	34.8265	168.705	254.839	20.1504	3.27009	1.23e-12	0.24458	0.173258	0.189666	122.389	58.354	1.23e-12	0.746574	5.50172	1.23e-12
neg_10561	Neurosporaxanthin	42.4	34.2	-4.51516	C35H46O2	497.34	9.19483	C08607	Carotenoid biosynthesis(ko00906);;Metabolic pathways(ko01100);;Biosynthesis of secondary metabolites(ko01110)	LMPR01070206	Prenol Lipids [PR]	Isoprenoids [PR01]	C40 isoprenoids (tetraterpenes) [PR0107]	--	--	--	--	--	--	279.486	822.454	830.615	1128.56	515.523	1808.71	2203.56	2946.91	1132.88	394.661	520.998	604.364	728.133	694.01	2097.81	1451.45	1615.51	448.901	1310.14	590.594
neg_1057	Deacetylasperulosidic acid	41.2	63.1	12.9166	C16H22O11	411.096	0.605117	--	--	--	--	--	--	HMDB0250901	--	Organic compounds	Lipids and lipid-like molecules	Prenol lipids	Terpene glycosides	2284.64	1612.72	1530.2	1287.61	1522.09	695.857	818.487	874.21	2305.01	1179.72	2982.02	1937.26	2656.25	1621.55	1901.37	868.519	5331.76	1443.81	1171.18	3753.08
neg_10573	Pseudoginsenoside RT5	49.3	63.5	-0.560673	C36H62O10	653.427	9.22345	--	--	--	--	--	--	--	--	--	--	--	--	89.6531	139.113	74.3248	168.675	91.0974	118.937	105.074	155.742	60.8343	10.837	164.598	49.9654	99.7551	120.039	224.084	65.2762	162.572	55.1207	26.2209	194.701
neg_1058	Isoliquiritin	42.9	54.5	-38.2498	C21H22O9	439.085	0.612267	C16978	--	LMPK12120021	Polyketides [PK]	Flavonoids [PK12]	Chalcones and dihydrochalcones [PK1212]	HMDB0037318	5041-81-6	Organic compounds	Phenylpropanoids and polyketides	Flavonoids	Flavonoid glycosides	143474	223752	277983	242727	237294	143369	184221	207560	141377	184905	231025	265068	244500	183583	136138	259214	174986	200450	219709	153824
neg_10583	Astragenol	48.5	68.8	19.7843	C30H50O5	535.35	9.23775	--	--	--	--	--	--	--	--	--	--	--	--	306.397	290.73	616.995	261.739	337.718	551.305	600.661	436.167	424.404	357.709	196.223	442.881	240.881	617.614	500.042	288.295	471.129	175.826	245.8	268.678
neg_10585	16-Hydroxyiridal (isoiridogermanal)	46.1	44.2	10.6792	C30H50O4	509.345	9.23775	--	--	--	--	--	--	--	--	--	--	--	--	674.939	729.219	1096.36	978.821	708.854	1096.47	1165.73	1483.1	768.187	513.535	631.575	506.522	939.182	573.062	1281.54	841.955	957.512	480.066	809.643	475.136
neg_10586	Capsidiol	45.5	66.1	-8.54986	C15H24O2	531.365	9.2449	C09627	Sesquiterpenoid and triterpenoid biosynthesis(ko00909)	LMPR0103250002	Prenol Lipids [PR]	Isoprenoids [PR01]	C15 isoprenoids (sesquiterpenes) [PR0103]	HMDB0002352	37208-05-2	Organic compounds	Lipids and lipid-like molecules	Prenol lipids	Sesquiterpenoids	649.088	1158.85	2059.35	1523.66	1202.55	1407.82	1750.85	2683.77	1114.57	749.52	773.722	600.796	1308.86	1024.75	2960.63	1367.64	1534.31	510.901	1403.79	332.602
neg_10587	3-O-Acetyl-beta-boswellic acid	46.1	46.4	-11.7338	C32H50O4	543.363	9.2449	--	--	LMPR0106180025	Prenol Lipids [PR]	Isoprenoids [PR01]	C30 isoprenoids (triterpenes) [PR0106]	HMDB0035160	5968-70-7	Organic compounds	Lipids and lipid-like molecules	Prenol lipids	Triterpenoids	111.896	557.894	1297.27	772.619	704.768	835.467	805.172	1182.79	420.648	164.463	130.288	276.853	479.618	513.189	1434.43	626.503	418.925	177.465	776.639	101.518
neg_10593	Caloxanthin	44.5	69.7	46.2096	C40H56O3	619.419	9.25205	C16282	Carotenoid biosynthesis(ko00906)	LMPR01070134	Prenol Lipids [PR]	Isoprenoids [PR01]	C40 isoprenoids (tetraterpenes) [PR0107]	--	--	--	--	--	--	1575.01	698.907	884.604	1238.94	622.973	299.649	109.012	279.749	187.447	163.464	3826.25	731.82	1601.49	643.698	234.277	235.304	240.216	211.518	106.758	192.616
neg_10601	cis-9,10-Epoxystearic acid	54.3	82.8	6.23734	C18H34O3	297.245	9.26633	--	--	--	--	--	--	HMDB0247617	--	Organic compounds	Lipids and lipid-like molecules	Fatty Acyls	Lineolic acids and derivatives	1902.67	1290.14	1877.11	1425.64	2061.89	968.434	1061.09	1027.81	1830.93	1764.94	2774.93	1499.34	2202.8	2118.97	1591.11	1133.14	3032.43	1329.06	1097.2	1218.61
neg_10603	(7Z,10Z,13Z,16Z,19Z)-Docosapentaenoic acid	44	67.4	27.7995	C22H34O2	365.234	9.26633	C16513	Biosynthesis of unsaturated fatty acids(ko01040)	--	--	--	--	--	--	--	--	--	--	29.6689	34.6714	39.7819	28.477	78.5849	23.3949	18.3786	13.6657	52.6252	36.3407	81.269	41.2445	31.6703	64.4111	35.3299	16.1748	76.6972	41.4154	18.4905	18.4114
neg_10606	(-)-Momordenol;Momordenol	40.9	20.1	-8.13069	C29H46O2	425.339	9.26633	--	--	--	--	--	--	--	--	--	--	--	--	113.002	577.967	830.052	1218.12	376.783	2152.25	2991.03	4318.34	1930.54	1098.84	89.9871	191.122	457.236	459.429	1806.44	2517.1	1543.28	338.328	2419.35	189.08
neg_10610	Caudatin	46.6	45.8	4.85771	C28H42O7	525.265	9.26633	--	--	LMST02030262	Sterol Lipids [ST]	Steroids [ST02]	C21 steroids (gluco/mineralocorticoids, progestogins) and derivatives [ST0203]	HMDB0249707	--	Organic compounds	Lipids and lipid-like molecules	Steroids and steroid derivatives	Pregnane steroids	2.1624	36.4854	39.8525	87.8618	3.0541	160.478	255.611	335.425	162.037	100.805	1.23e-12	2.29061	5.62959	21.1918	124.359	199.029	126.86	20.3648	168.337	1.33256
neg_10611	Neriifolin	47.9	53.4	0.645449	C30H46O8	569.289	9.26633	C08876	--	LMST01120021	Sterol Lipids [ST]	Sterols [ST01]	Cardanolides and derivatives [ST0112]	--	--	--	--	--	--	0.470028	24.8196	34.765	50.773	7.2268	62.3421	45.9245	145.488	3.89677	0.124751	3.68394	1.23e-12	5.35821	22.1024	129.272	22.0663	17.8943	1.23e-12	60.8103	0.00181898
neg_10612	5-Hydroxy-1-(4-hydroxyphenyl)-3-decanone	41.3	38.2	-16.3181	C16H24O3	573.335	9.2735	C17747	Stilbenoid, diarylheptanoid and gingerol biosynthesis(ko00945);;Biosynthesis of secondary metabolites(ko01110)	--	--	--	--	--	--	--	--	--	--	76.2287	28.277	31.1201	27.3731	44.9445	75.1689	27.5556	55.0255	68.6755	25.7437	77.1685	25.6566	45.934	29.7581	38.9015	16.906	41.3711	20.0056	8.37159	33.5389
neg_10615	3',4'-Dihydrorhodovibrin	45.7	46.7	9.33214	C41H62O2	607.455	9.26633	C15887	Carotenoid biosynthesis(ko00906);;Metabolic pathways(ko01100);;Biosynthesis of secondary metabolites(ko01110)	LMPR01070139	Prenol Lipids [PR]	Isoprenoids [PR01]	C40 isoprenoids (tetraterpenes) [PR0107]	--	--	--	--	--	--	521.415	787.567	1389.41	1563.88	1032.15	397.595	359.34	782.128	564.208	418.499	5053.84	596.21	1539.23	1143.28	899.556	945.044	2612.83	1050.21	520.256	1795.94
neg_10617	24-Hydroxy-beta-amyrin	41.8	52.7	35.6166	C30H50O2	477.366	9.28065	C19732	Sesquiterpenoid and triterpenoid biosynthesis(ko00909);;Biosynthesis of secondary metabolites(ko01110)	--	--	--	--	--	--	--	--	--	--	286.335	307.038	476.147	319.321	407.39	343.523	390.682	486.218	295.262	199.055	110.649	195.856	458.553	222.11	682.375	236.546	424.324	164.784	146.631	65.982
neg_10620	4'-Apo-beta,psi-caroten-4'-al	40.2	46.8	40.3124	C35H46O	503.349	9.2878	C19892	Carotenoid biosynthesis(ko00906);;Metabolic pathways(ko01100);;Biosynthesis of secondary metabolites(ko01110)	LMPR01070596	Prenol Lipids [PR]	Isoprenoids [PR01]	C40 isoprenoids (tetraterpenes) [PR0107]	--	--	--	--	--	--	15.2683	168.453	324.875	224.611	364.044	279.648	222.486	350.299	104.788	57.7815	12.533	79.9471	165.12	214.734	434.239	155.48	82.6316	29.8961	176.577	23.3175
neg_10621	Kadcoccilactone A	46.2	40.9	2.39259	C30H44O7	515.303	9.2878	--	--	--	--	--	--	--	--	--	--	--	--	333.342	803.558	516.564	574.119	629.332	651.63	766.131	996.677	3071.25	2228.96	269.301	498.626	584.593	629.432	714.874	710.585	858.887	879.542	735.561	482.533
neg_10623	13(S)-HODE	40.3	42.9	-20.5354	C18H32O3	637.456	9.29495	C14762	Linoleic acid metabolism(ko00591)	--	--	--	--	--	--	--	--	--	--	10.7651	501.258	186.028	898.839	84.7937	88.1787	35.9783	97.6828	44.2293	32.9129	17.6957	14.4649	20.8415	138.345	48.3099	93.2759	38.2418	32.9684	8.70462	9.19132
neg_10625	3alpha,7alpha,12alpha,26-Tetrahydroxy-5beta-cholestane	50.6	81.5	24.1289	C27H48O4	481.364	9.30208	C05446	Metabolic pathways(ko01100)	LMST04030014	Sterol Lipids [ST]	Bile acids and derivatives [ST04]	C27 bile acids, alcohols, and derivatives [ST0403]	HMDB0001231	862-53-3	Organic compounds	Lipids and lipid-like molecules	Steroids and steroid derivatives	Bile acids, alcohols and derivatives	318.722	1292.15	2177.21	2174.96	771.704	3838.71	2961.41	6253.06	1758.03	1110	379.904	665.316	1366.71	1170.92	4247.7	3632.43	2240.6	824.224	4590.56	374.044
neg_10632	2,3-Dimethyl-5-phytylquinol	51.2	67.8	-3.26984	C28H48O2	437.339	9.30925	C15883	Ubiquinone and other terpenoid-quinone biosynthesis(ko00130);;Metabolic pathways(ko01100);;Biosynthesis of secondary metabolites(ko01110);;Biosynthesis of cofactors(ko01240)	--	--	--	--	--	--	--	--	--	--	34.211	417.508	626.042	708.557	239.536	2199.16	1454.01	2887.31	556.19	401.764	8.72641	143.022	436.578	323.609	1084.24	1507.7	812.66	239.712	2684.46	88.9649
neg_10643	12-Oxo-phytodienoic acid	41.5	27.8	18.3165	C18H28O3	291.202	9.32355	--	--	--	--	--	--	HMDB0302724	--	Organic compounds	Lipids and lipid-like molecules	Fatty Acyls	Eicosanoids	18.5115	51.757	51.7787	68.7546	41.1295	11.036	13.4249	6.98828	18.1043	18.7868	24.3953	20.2775	15.9856	10.1941	6.9285	20.2595	38.6455	31.6339	13.5441	9.65683
neg_10645	Cnidilide	48.4	59	4.46651	C12H18O2	387.256	9.31638	C16937	--	--	--	--	--	HMDB0302259	--	Organic compounds	Organoheterocyclic compounds	Isobenzofurans	--	18630.7	833.387	1672.91	786.766	1002.04	910.485	641.682	1027.16	992.344	651.647	73285.5	9263.2	17753.9	5698.52	1570.97	673.172	21258.8	331.202	713.037	56.154
neg_10649	Trichilenone	42.6	23.1	-0.594866	C26H34O4	455.244	9.31638	--	--	--	--	--	--	--	--	--	--	--	--	406.004	11.7304	0.0204012	0.141132	1.12292	1.23e-12	0.295883	0.108641	58.4105	1.26396	1294.55	146.296	287.713	83.722	0.00381536	1.23e-12	476.14	0.213748	1.23e-12	2.98757
neg_10652	11-?Keto-?beta-?boswellic acid	47	54.5	6.93901	C30H46O4	515.341	9.31638	--	--	--	--	--	--	--	--	--	--	--	--	210.591	498.942	427.088	604.609	334.818	661.949	829.701	1064.77	1056.23	770.398	125.714	331.844	278.654	447.871	947.414	775.073	679.759	405.186	719.453	246.825
neg_10657	L-Urobilin	40.6	21.2	-4.62119	C33H46N4O6	593.332	9.32355	C05793	Porphyrin metabolism(ko00860)	--	--	--	--	--	--	--	--	--	--	548.047	480.406	669.87	605.454	537.672	6142.28	3379.52	2283.7	4857.14	11182.1	547.322	419.577	676.402	501.851	603.256	1690.43	8454.05	4192.91	2186.16	1935.43
neg_10658	Coclaurine	42.7	20.8	3.95681	C17H19NO3	615.273	9.31638	C06161	Isoquinoline alkaloid biosynthesis(ko00950);;Metabolic pathways(ko01100);;Biosynthesis of secondary metabolites(ko01110)	--	--	--	--	HMDB0303359	--	Organic compounds	Organoheterocyclic compounds	Isoquinolines and derivatives	Benzylisoquinolines	1.23e-12	1.23e-12	15.6993	42.0494	1.23e-12	70.3477	76.0092	185.644	8.54461	1.23e-12	1.23e-12	1.23e-12	1.23e-12	18.7889	142.707	93.4757	9.97809	3.49839	131.854	1.23e-12
neg_10667	Testosterone	46.9	46.6	6.74873	C19H28O2	333.209	9.345	C00535	Metabolic pathways(ko01100)	LMST02020002	Sterol Lipids [ST]	Steroids [ST02]	C19 steroids (androgens) and derivatives [ST0202]	HMDB0000234	58-22-0	Organic compounds	Lipids and lipid-like molecules	Steroids and steroid derivatives	Androstane steroids	264.448	1.04925	2.91731	8.95266	1.23e-12	1.23e-12	1.23e-12	1.23e-12	1.23e-12	1.23e-12	1935.03	93.2453	268.953	77.162	1.23e-12	1.23e-12	79.7648	1.23e-12	1.23e-12	1.23e-12
neg_10669	3alpha,7alpha-Dihydroxy-5beta-cholestane	44.2	31.9	-2.6394	C27H48O2	425.339	9.345	C05452	Metabolic pathways(ko01100)	--	--	--	--	HMDB0006893	3862-26-8	Organic compounds	Lipids and lipid-like molecules	Steroids and steroid derivatives	Cholestane steroids	138.744	611.948	838.422	1030.03	517.922	2451.39	1822.64	3004.19	1215.86	634.073	301.97	288.257	612.68	520.101	1512.32	1384.14	1045.57	286.83	1718.96	206.494
neg_1068	Jaceosidin-7-O-Glucoside	43.7	76.1	41.055	C23H24O12	513.122	0.612267	--	--	--	--	--	--	--	--	--	--	--	--	4419.7	3333.71	4708.23	3227.57	3922.08	3325.52	2571.79	4125.75	11193.3	3633.7	5264.04	4709.99	3483.52	3448.49	4255.65	5638.71	3716.4	4128.09	4377.91	2420.36
neg_10696	Pneumocandin B0	53.2	86.2	7.7583	C50H80N8O17	1085.55	9.41577	--	--	--	--	--	--	HMDB0256654	--	Organic compounds	Organic acids and derivatives	Carboxylic acids and derivatives	Amino acids, peptides, and analogues	192.4	258.897	129.929	258.691	403.437	145.63	216.306	108.321	309.876	30.7902	240.983	183.67	403.267	118.945	136.504	137.117	260.509	368.216	370.538	146.194
neg_10703	δ-Tocotrienol	45.1	82.1	26.5926	C27H40O2	441.312	9.41577	C14156	Ubiquinone and other terpenoid-quinone biosynthesis(ko00130);;Metabolic pathways(ko01100);;Biosynthesis of secondary metabolites(ko01110)	LMPR02020056	Prenol Lipids [PR]	Quinones and hydroquinones [PR02]	Vitamin E [PR0202]	HMDB0030008	25612-59-3	Organic compounds	Lipids and lipid-like molecules	Prenol lipids	Quinone and hydroquinone lipids	744.099	1170.43	2346.93	939.994	2527.54	610.237	687.104	950.117	1273.78	1151.09	1458.15	1555.77	1773.21	1458.27	1873.21	911.093	2264.8	720.5	737.162	730.396
neg_10707	2,3,23-Trihydroxyolean-12-en-28-oic acid methyl ester	47.4	75	36.187	C31H50O5	523.359	9.41577	--	--	--	--	--	--	--	--	--	--	--	--	114.905	648.488	938.743	738.999	588.839	1060	1036.5	1754.43	602.314	304.052	134.591	248.254	449.829	335.48	1433.55	622.082	683.661	219.942	529.574	174.727
neg_10716	alpha-Hydroxylinoleic acid	44.3	46.7	-9.02691	C18H32O3	637.463	9.41577	--	--	--	--	--	--	--	--	--	--	--	--	1.23e-12	526.343	156.231	1441.85	102.492	36.4114	22.0037	113.978	6.50986	11.8912	26.9361	7.76262	16.8901	103.442	23.6639	36.1043	40.1675	27.9873	0.0900162	15.7497
neg_10721	Gypenoside XLIX	45.5	80	14.7609	C52H86O21	1081.55	9.43007	--	--	--	--	--	--	--	--	--	--	--	--	43.8904	41.7506	9.14255	45.132	100.076	63.5581	58.8537	3.75729	57.7182	12.268	64.3309	25.365	118.495	48.8669	29.0505	76.0536	112.338	58.5116	51.6518	41.3727
neg_10722	Hexadecanal	40.8	25.7	8.42615	C16H32O	285.246	9.43007	C00517	Fatty acid degradation(ko00071)	LMFA06000088	Fatty Acyls [FA]	Fatty aldehydes [FA06]	--	HMDB0001551	629-80-1	Organic compounds	Lipids and lipid-like molecules	Fatty Acyls	Fatty aldehydes	260.309	163.898	195.995	126.34	271.109	130.807	132.923	133.517	313.153	364.393	425.036	216.271	325.093	230.54	205.92	138.469	482.442	183.106	122.957	177.676
neg_10728	6-Deoxocathasterone	46.4	42.2	-3.36755	C28H50O2	439.354	9.44437	C15798	Brassinosteroid biosynthesis(ko00905);;Metabolic pathways(ko01100);;Biosynthesis of secondary metabolites(ko01110)	LMST01030124	Sterol Lipids [ST]	Sterols [ST01]	Ergosterols and C24-methyl derivatives [ST0103]	--	--	--	--	--	--	368.508	2137.63	2801.94	4032.49	1270.73	5197.43	6421.52	11698	4648.59	2403.25	371.096	675.313	1365.07	1439.63	5925.25	6237.43	4400.13	1058.08	5272.63	624.858
neg_10729	3-Dehydroteasterone	40.6	37.4	-18.1279	C28H46O4	491.32	9.43722	C15792	Brassinosteroid biosynthesis(ko00905);;Metabolic pathways(ko01100);;Biosynthesis of secondary metabolites(ko01110)	LMST01030131	Sterol Lipids [ST]	Sterols [ST01]	Ergosterols and C24-methyl derivatives [ST0103]	HMDB0041527	124853-28-7	Organic compounds	Lipids and lipid-like molecules	Steroids and steroid derivatives	Bile acids, alcohols and derivatives	591.938	712.737	971.706	771.501	1025.83	705.489	595.344	592.563	1955.71	1359.61	1178.67	3110.83	705.613	2140.24	813.277	508.443	1073.61	428.699	321.045	389.852
neg_10732	Okenone	40.7	31.6	19.8798	C41H54O2	613.393	9.43722	C16280	Carotenoid biosynthesis(ko00906);;Biosynthesis of secondary metabolites(ko01110)	LMPR01070622	Prenol Lipids [PR]	Isoprenoids [PR01]	C40 isoprenoids (tetraterpenes) [PR0107]	--	--	--	--	--	--	320.255	130.052	223.356	186.513	181.652	112.31	95.6138	139.165	113.937	63.7346	172.716	88.8194	194.553	132.845	170.907	96.8248	133.987	42.531	40.0751	74.9634
neg_10739	25-O-Methylalisol A	47.5	72	28.1338	C31H52O5	525.37	9.45152	--	--	--	--	--	--	--	--	--	--	--	--	569.854	2022.77	3718.05	2162.41	2453.66	1262.54	1047.43	1408.45	739.401	347.637	290.792	875.451	1172.18	859.806	2441.6	589.853	709.486	213.251	367.649	197.707
neg_1074	Methionyl-Aspartate	47	68.5	-26.9254	C9H16N2O5S	587.156	0.612267	--	--	--	--	--	--	HMDB0028969	--	Organic compounds	Organic acids and derivatives	Carboxylic acids and derivatives	Amino acids, peptides, and analogues	819.553	1002.91	1064.24	884.763	771.581	2479.62	2094.91	3963.71	1058.61	958.66	1970.77	1342.76	991.32	1107.82	1045.85	5765.99	2209.6	4017.03	4636.37	1161.98
neg_10759	Docosanedioate	47.9	48.7	7.07635	C22H42O4	369.304	9.47297	C19625	Cutin, suberine and wax biosynthesis(ko00073)	--	--	--	--	HMDB0304342	--	Organic compounds	Lipids and lipid-like molecules	Fatty Acyls	Fatty acids and conjugates	967.59	509.331	831.101	391.901	692.988	461.738	460	558.978	636.55	806.95	2027.87	878.69	2140.78	1000.46	1039.09	395.651	1170.91	477.436	288.039	390.544
neg_10760	11-Dehydro-thromboxane B2	45.6	42	7.06107	C20H32O6	389.197	9.47297	C05964	Arachidonic acid metabolism(ko00590);;Metabolic pathways(ko01100)	LMFA03030014	Fatty Acyls [FA]	Eicosanoids [FA03]	Thromboxanes [FA0303]	HMDB0004242	67910-12-7	Organic compounds	Lipids and lipid-like molecules	Fatty Acyls	Eicosanoids	2.80572	1.23e-12	97.0773	0.288293	135.305	14.0746	1.23e-12	7.10762	1.23e-12	28.2986	424.471	47.5302	6.48935	27.7844	1.23e-12	1.23e-12	2.18057	1.23e-12	4.70296	1.23e-12
neg_10763	Broussonetine B	48.4	71.4	19.0833	C24H45NO10	528.289	9.46582	--	--	--	--	--	--	--	--	--	--	--	--	1.23e-12	15.3636	53.5149	16.8005	28.7789	2.72343	6.40166	2.88976	1.95788	1.215	2.09913	18.896	5.64939	84.151	62.6514	9.50941	10.4356	2.0824	8.81035	3.56518
neg_10765	Desacetylovatifolin	41.7	26.2	-14.3864	C15H20O4	573.263	9.46582	--	--	--	--	--	--	--	--	--	--	--	--	28.4639	5.38046	18.6572	10.1061	9.58283	148.329	82.2497	177.774	17.7338	8.45673	20.3597	1.84784	13.0644	12.3363	38.1445	73.2048	1.23e-12	2.27295	122.393	6.10117
neg_10766	Artemisinin B	42.7	30.8	5.2621	C15H22O4	591.32	9.47297	--	--	--	--	--	--	--	--	--	--	--	--	121.475	561.887	772.653	671.808	482.329	446.005	332.771	435.039	298.092	182.514	212.16	274.679	370.775	449.548	1101.78	238.525	237.529	82.0677	180.783	114.453
neg_10778	Rapanone	48.7	53.6	6.60078	C19H30O4	321.209	9.48012	C10399	--	LMPK15050009	Polyketides [PK]	Phenolic lipids [PK15]	Alkyl hydroquinones and derivatives [PK1505]	--	--	--	--	--	--	634.581	233.783	4896.29	96.1654	4632.95	68.7046	54.6354	67.1268	111.382	97.8466	15326.1	3981.04	504.479	2422.05	103.985	67.1261	269.209	79.063	71.1019	79.0248
neg_10779	Riboflavin	41.6	25.2	-9.25437	C17H20N4O6	421.133	9.48012	C00255	Riboflavin metabolism(ko00740);;Metabolic pathways(ko01100);;Biosynthesis of secondary metabolites(ko01110);;Biosynthesis of cofactors(ko01240);;ABC transporters(ko02010)	--	--	--	--	HMDB0000244	83-88-5	Organic compounds	Organoheterocyclic compounds	Pteridines and derivatives	Alloxazines and isoalloxazines	1.23e-12	1.23e-12	379.305	1.23e-12	408.592	1.23e-12	0.568144	1.23e-12	3.12425	21.7195	1419.92	247.091	3.09855	135.579	1.23e-12	4.45891	20.2636	0.327442	4.26464	3.15683
neg_10782	Epothilone B	50.3	79.4	-6.38394	C27H41NO6S	528.237	9.48012	C12154	--	LMPK04000041	Polyketides [PK]	Macrolides and lactone polyketides [PK04]	--	HMDB0251874	--	Organic compounds	Phenylpropanoids and polyketides	Macrolides and analogues	Epothilones and analogues	0.12525	53.4293	132.31	7.66202	131.927	0.871432	0.951243	1.23e-12	16.6254	1.49322	0.389439	85.0391	73.3691	405.864	129.178	2.04578	13.1613	4.21667	0.0606423	3.26676
neg_1081	4-Amino-5-hydroxymethyl-2-methylpyrimidine diphosphate	41.5	26.6	-17.9563	C6H11N3O7P2	657.018	0.605117	C04752	Thiamine metabolism(ko00730);;Metabolic pathways(ko01100);;Biosynthesis of cofactors(ko01240)	--	--	--	--	HMDB0301920	--	Organic compounds	Organic oxygen compounds	Organic oxoanionic compounds	Organic pyrophosphates	45.3511	120.405	54.8243	73.3751	104.1	7.11903	43.7636	34.7425	156.958	155.808	203.519	72.896	291.841	107.299	38.8787	372.269	743.842	368.48	224.298	1453.3
neg_10818	11-Octadecanoic acid(Vaccenic acid)	42.4	30.5	-3.05508	C18H34O2	609.556	9.48727	--	--	--	--	--	--	--	--	--	--	--	--	35679	21010.1	27003.8	19557.4	31017.8	14208.2	15831.9	16020.3	28940.4	23533	34592.3	24126.9	32514.6	22588.6	25210.5	16906.2	41040.9	19180.1	16826.4	25866.5
neg_10820	10-OPDA	41.6	37.1	18.5691	C18H28O3	291.202	9.48727	C16325	alpha-Linolenic acid metabolism(ko00592);;Biosynthesis of secondary metabolites(ko01110)	--	--	--	--	--	--	--	--	--	--	30.8189	36.0364	30.9487	34.0269	15.4792	10.5614	13.5663	7.7084	17.8019	11.6966	77.1255	31.4882	40.6838	22.8935	2.79232	21.6734	70.0885	29.1806	3.89861	1.23e-12
neg_10821	[6]-Gingerol	41.9	31.2	16.6167	C17H26O4	293.181	9.49442	C10462	Stilbenoid, diarylheptanoid and gingerol biosynthesis(ko00945);;Biosynthesis of secondary metabolites(ko01110)	LMPK15020007	Polyketides [PK]	Phenolic lipids [PK15]	Alkyl catechols and derivatives [PK1502]	HMDB0005783	58253-27-3	Organic compounds	Benzenoids	Phenols	Methoxyphenols	1439.45	850.568	1069.63	781.1	1315.4	715.986	721.313	789.233	1593.27	1299.52	1727.26	1163.29	1443.59	1034.87	1027.64	867.985	2244.33	957.273	793.838	1227.29
neg_10829	Aphidicolin	49.7	63.4	10.554	C20H34O4	359.224	9.49442	C06088	Diterpenoid biosynthesis(ko00904);;Biosynthesis of secondary metabolites(ko01110)	--	--	--	--	HMDB0248510	--	--	--	--	--	24.8894	2356.12	318.843	232.626	1498.04	11.3533	16.9205	284.535	11.7784	2.26039	259.699	1245.2	523.312	314.96	10.9705	1087.76	119.464	5516.41	355.817	87.6814
neg_1084	Sagittatoside A	51.8	89.8	-19.3974	C33H40O15	697.198	0.612267	--	--	LMPK12112006	Polyketides [PK]	Flavonoids [PK12]	Flavones and Flavonols [PK1211]	--	--	--	--	--	--	1250.8	1712.78	5485.54	3264.34	3404.12	865.878	1754.18	1090.49	1338.08	757.789	837.591	1725.27	3394	1127.72	15946.9	739.141	809.572	501.434	965.025	276.617
neg_10852	Lactuside B	46.5	52.7	9.53629	C21H32O9	427.201	9.48727	--	--	--	--	--	--	--	--	--	--	--	--	112.088	167.188	100.093	95.7885	154.073	88.305	100.956	102.94	173.769	163.834	232.08	151.549	153.312	139.467	79.7174	165.128	346.987	292.659	105.319	136.833
neg_10853	17-(Furan-3-yl)-7-hydroxy-4,4,8-trimethylandrosta-1,14-diene-3,16-dione (Nimbocinol)	46.4	59.9	-23.9252	C26H32O4	429.195	9.48727	--	--	--	--	--	--	--	--	--	--	--	--	3292.45	2443.89	3129.86	2648.95	2662.66	2677.64	2922.75	2798.24	4871.73	4840.16	6140.27	3425.45	4918.73	3872.13	2728.79	3754.23	9666.96	3319.81	2643.01	3815.06
neg_10856	PA(18:1/0:0)	48	45.5	-0.454836	C21H41O7P	435.252	9.49442	--	--	LMGP10050008	Glycerophospholipids [GP]	Glycerophosphates [GP10]	Monoacylglycerophosphates [GP1005]	--	--	--	--	--	--	60643.4	17514.3	34866.4	26106.5	13444	22050.1	16198.7	14720.7	38185	38960.1	77014.8	33427.3	36925.9	21451.1	9937.21	22536.1	69952.9	29040	23284.2	27587.4
neg_10857	Gamabufotalin	50	83.1	31.9861	C24H34O5	447.252	9.48727	C16962	--	LMST01130026	Sterol Lipids [ST]	Sterols [ST01]	Bufanolides and derivatives [ST0113]	HMDB0252604	--	Organic compounds	Lipids and lipid-like molecules	Steroids and steroid derivatives	Steroid lactones	298134	63652.8	106682	31904.7	34534	283199	94518.5	158989	220265	200170	282559	139691	139757	135948	30567.3	23040.9	221992	49967.7	97000.6	69867.5
neg_10866	IBMX	45.3	36	6.294	C10H14N4O2	503.24	9.48727	C13708	--	--	--	--	--	HMDB0245912	--	Organic compounds	Organoheterocyclic compounds	Imidazopyrimidines	Purines and purine derivatives	1286.2	321.115	615.637	480.271	284.884	517.48	335.129	268.392	814.145	836.833	1743.56	587.367	614.252	427.605	113.726	441.557	1609.89	580.278	426.053	566.411
neg_10867	Costunolide	42.3	26.4	-6.05522	C15H20O2	509.288	9.48727	C09382	Sesquiterpenoid and triterpenoid biosynthesis(ko00909);;Biosynthesis of secondary metabolites(ko01110)	--	--	--	--	HMDB0036688	553-21-9	Organic compounds	Lipids and lipid-like molecules	Prenol lipids	Terpene lactones	24503.7	10212.3	17886.6	14901.6	10866.3	11410.9	11623.5	14468.4	15238.3	13140.6	31124.4	19024.1	31145.9	14816.4	18104	17785.9	28047.4	18174.9	20110.6	18251.1
neg_10868	Poricoic acid B	45.8	51.3	3.99523	C30H44O5	529.319	9.49442	--	--	--	--	--	--	--	--	--	--	--	--	210.682	234.417	183.297	290.19	202.827	160.746	185.959	180.893	336.583	543.11	228.308	205.121	222.514	280.587	224.083	244.678	415.917	325.604	191.122	251.017
neg_10871	L-Oleandrosyl-oleandolide	50.2	75.6	-13.9981	C27H46O10	551.276	9.48727	C11992	Metabolic pathways(ko01100);;Biosynthesis of secondary metabolites(ko01110)	LMPK04000033	Polyketides [PK]	Macrolides and lactone polyketides [PK04]	--	--	--	--	--	--	--	329.451	419.603	695.793	770.227	253.747	1855.5	1089.23	2031.62	697.668	462.821	487.628	308.828	656.826	459.904	1191.12	1142.03	1060.3	324.307	1602.93	231.787
neg_10873	Pentalenate	43.3	44.6	17.0656	C15H22O3	559.336	9.48727	C20405	Biosynthesis of secondary metabolites(ko01110)	--	--	--	--	--	--	--	--	--	--	138.741	138.63	440.451	125.752	190.733	203.415	221.459	178.205	335.421	268.939	1124.81	474.297	483.899	937.696	398.134	197.127	1222.06	121.543	113.588	271.848
neg_10879	3-Hexaprenyl-4,5-dihydroxybenzoate	43.9	76.1	-47.2869	C37H54O4	583.35	9.49442	C05200	--	--	--	--	--	HMDB0001063	63975-40-6	Organic compounds	Lipids and lipid-like molecules	Prenol lipids	Polyprenylphenols	82.4645	116.889	109.746	88.0272	69.3587	191.185	138.998	83.6719	47.4926	200.675	25.0431	185.883	66.3116	143.424	20.7929	51.1417	29.6521	49.4235	19.3044	3.57305
neg_10885	Momordicin IV;Momordicine IV	46.5	57.8	6.06777	C36H58O9	633.405	9.48727	--	--	--	--	--	--	--	--	--	--	--	--	266.776	77.0969	112.689	103.344	72.6199	59.1067	49.7086	40.3211	61.145	41.9858	536.808	151.395	361.671	167.648	24.1521	88.5514	214.108	64.7121	22.8293	52.3872
neg_10891	13-Hydroperoxy-9Z,11E-octadecadienoic acid	41.7	33.9	-15.4146	C18H32O4	669.449	9.49442	--	--	--	--	--	--	--	--	--	--	--	--	1034.79	2041.98	2609.12	1499.76	771.513	611.352	505.123	2456.04	3395.12	1604.44	1140.75	2262.69	3807.84	1573.7	2049.61	750.465	1225.05	1694.54	1632.02	2149.3
neg_10893	15H-11,12-EETA	41.1	30.8	15.2593	C20H32O4	671.463	9.49442	C14781	Arachidonic acid metabolism(ko00590);;Metabolic pathways(ko01100)	--	--	--	--	HMDB0005050	877878-78-9	Organic compounds	Organic acids and derivatives	Hydroxy acids and derivatives	Medium-chain hydroxy acids and derivatives	19410.2	42786.9	71864.4	35463.3	17017.9	9240.24	8929.46	31269.3	41366.3	47091.3	21409.5	7612.9	16246.8	41499.4	44737.1	11964.6	25171.7	6031.3	34840.7	46719.7
neg_1090	Troxerutin	54.9	89.2	1.32254	C33H42O19	777.202	0.605117	--	--	--	--	--	--	HMDB0006083	7085-55-4	Organic compounds	Phenylpropanoids and polyketides	Flavonoids	Flavonoid glycosides	3191.1	1011.32	1903.38	1049.12	1716.26	598.236	428.14	740.281	2712.8	810.452	1489.56	893.642	1774.49	892.489	2537.28	181.067	1643.29	228.601	234.747	285.924
neg_10927	2-Hydroxyparaconate	40.2	22.6	21.0391	C5H6O5	166.999	9.50157	C21632	C5-Branched dibasic acid metabolism(ko00660);;Metabolic pathways(ko01100)	--	--	--	--	--	--	--	--	--	--	474.007	282.368	372.4	257.652	391.005	204.887	212.265	254.768	450.782	361.369	450.179	343.888	448.323	320.963	343.88	225.218	497.462	284.957	258.566	384.879
neg_10929	15S-Hydroxy-8,11,13-eicosatrienoic acid	41.9	43	-28.9736	C20H34O3	367.24	9.50157	--	--	--	--	--	--	--	--	--	--	--	--	183.76	108.037	139.742	116.295	149.407	124.472	101.9	134.271	201.646	269.102	264.49	145.59	247.501	154.789	133.561	116.788	395.568	191.701	124.359	176.381
neg_10931	bersaldegenin-1,3,5-orthoacetate	47.7	42.5	2.25682	C26H32O7	455.209	9.50157	--	--	--	--	--	--	--	--	--	--	--	--	510.603	679.642	665.958	751.834	506.622	501.266	654.469	877.949	902.207	3098.51	1761.64	766.976	1339.53	912.915	646.517	1514.43	3658.11	2291.5	1005.57	2311.73
neg_10936	Manumycin A	45	57.4	-25.7517	C31H38N2O7	585.267	9.50157	C12111	--	LMFA08020185	Fatty Acyls [FA]	Fatty amides [FA08]	N-acyl amines [FA0802]	HMDB0242678	--	Organic compounds	Organic oxygen compounds	Organooxygen compounds	Carbonyl compounds	76.4584	122.195	257.02	181.255	87.8529	620.358	269.271	460.674	132.52	57.4652	147.917	23.0377	75.4278	69.5469	301.961	194.951	197.113	41.0836	286.8	32.3122
neg_10937	Acetylcimigenol 3-O-alpha-L-arabinopyran	45.9	46.3	0.603292	C37H58O10	661.396	9.50157	--	--	--	--	--	--	--	--	--	--	--	--	409.857	393.729	440.223	438.789	448.673	455.151	469.359	417.126	771.923	482.902	691.697	367.838	419.124	501.844	431.193	336.864	840.219	435.573	219.73	247.866
neg_1094	Diacetyl	42.1	34.9	20.3466	C4H6O2	85.0313	0.612267	C00741	Butanoate metabolism(ko00650);;Biosynthesis of secondary metabolites(ko01110)	LMFA12000012	Fatty Acyls [FA]	Oxygenated hydrocarbons [FA12]	--	HMDB0003407	431-03-8	Organic compounds	Organic oxygen compounds	Organooxygen compounds	Carbonyl compounds	129.22	86.4275	63.5112	79.398	107.081	43.7164	46.4954	39.1101	114.721	93.2142	85.6621	71.6225	133.364	87.9236	105.057	35.565	100.959	60.6984	62.0476	90.7739
neg_10940	Vinblastine	40.4	31.8	-12.4158	C46H58N4O9	809.403	9.50157	C07201	Indole alkaloid biosynthesis(ko00901);;Metabolic pathways(ko01100);;Biosynthesis of secondary metabolites(ko01110)	--	--	--	--	HMDB0014710	865-21-4	Organic compounds	Organic acids and derivatives	Carboxylic acids and derivatives	Amino acids, peptides, and analogues	4841.18	1787.23	2213.19	4133.02	7723.15	2952.39	1599.57	937.448	1259.6	5245.92	1867.67	2555.01	2453.73	5932.44	4263.45	162.976	370.326	918.421	504.738	3679.85
neg_10941	Nodularin	46.2	69.9	-15.6207	C41H60N8O10	823.423	9.50157	C15713	--	--	--	--	--	HMDB0255692	--	Organic compounds	Organic acids and derivatives	Carboxylic acids and derivatives	Amino acids, peptides, and analogues	746.667	114.473	1372.52	1423.27	969.943	1066.07	949.103	86.6171	66.3413	1470.41	2574.29	110.749	165.688	1200.91	1022.62	526.215	1338.21	109.914	1212.15	1549.47
neg_10945	Esculeogenin A	42	26.2	-0.0821256	C27H45NO4	446.328	9.50872	--	--	--	--	--	--	HMDB0251946	--	Organic compounds	Lipids and lipid-like molecules	Steroids and steroid derivatives	Steroidal alkaloids	58.9066	366.311	835.468	261.55	663.471	96.374	72.1668	116.57	77.7501	99.8979	210.589	605.855	837.956	479.997	877.449	148.633	355.037	99.9546	130.499	67.4927
neg_1097	7-O-Methylaloesin	41.6	43.9	-22.9737	C20H24O9	861.264	0.605117	--	--	--	--	--	--	--	--	--	--	--	--	1483.73	908.842	1381.97	1381.02	1242.26	406.63	436.83	455.168	1487.33	418.622	697.323	768.794	1243.81	713.232	3789.2	320.497	802.843	267.758	351.175	201.191
neg_10976	Megalomicin C2	50.7	86.5	-12.7849	C49H86N2O17	995.555	9.55162	C11988	Biosynthesis of secondary metabolites(ko01110)	LMPK04000029	Polyketides [PK]	Macrolides and lactone polyketides [PK04]	--	--	--	--	--	--	--	319.253	361.255	214.524	271.351	200.136	608.878	194.561	369.068	230.903	165.812	227.279	211.775	239.715	358.913	103.753	138.208	306.503	192.088	278.55	248.869
neg_10979	11-Keto-.beta.-boswellic acid	47.1	51.5	-6.86179	C30H46O4	491.311	9.55877	--	--	--	--	--	--	--	--	--	--	--	--	504.94	464.832	617.862	479.464	653.361	402.9	492.083	297.315	2708.18	1646.37	302.637	695.27	509.863	708.788	537.19	339.074	702.679	443.558	277.339	274.005
neg_1098	Methyl aklanonate	41.4	57.4	-40.585	C22H18O8	879.181	0.612267	C12422	Metabolic pathways(ko01100);;Biosynthesis of secondary metabolites(ko01110)	--	--	--	--	--	--	--	--	--	--	388.119	351.345	391.8	381.293	424.599	242.624	270.553	236.706	398.914	428.992	684.023	422.955	485.468	448.459	486.336	642.07	287.16	511.082	446.627	319.183
neg_10999	Dammarenediol II	45.9	41.1	-4.90394	C30H52O2	465.369	9.58022	--	--	--	--	--	--	--	--	--	--	--	--	435.193	2304.92	3844.22	3860.76	1363.95	4627.16	5016.04	10428	3002.5	1783.24	300.979	862.508	1545.63	1753.18	7303.92	5868.22	3876.69	1381.35	5660.44	659.259
neg_11000	Castasterone	46.4	77.1	46.1153	C28H48O5	499.341	9.58022	C15794	Brassinosteroid biosynthesis(ko00905);;Metabolic pathways(ko01100);;Biosynthesis of secondary metabolites(ko01110)	LMST01030129	Sterol Lipids [ST]	Sterols [ST01]	Ergosterols and C24-methyl derivatives [ST0103]	HMDB0301789	80736-41-0	Organic compounds	Lipids and lipid-like molecules	Steroids and steroid derivatives	Bile acids, alcohols and derivatives	116.731	525.564	390.55	515.5	204.796	680.46	657.627	976.859	657.895	613.323	88.2438	220.145	158.926	269.332	694.091	783.712	534.4	326.547	717.175	158.063
neg_11001	Goshuyic acid	43.4	37.2	16.4837	C14H22O2	503.345	9.58022	--	--	LMFA01030257	Fatty Acyls [FA]	Fatty Acids and Conjugates [FA01]	Unsaturated fatty acids [FA0103]	HMDB0000560	39039-37-7	Organic compounds	Lipids and lipid-like molecules	Fatty Acyls	Fatty acids and conjugates	1.23e-12	11.8387	14.9941	33.4733	18.8803	49.8726	54.1223	109.497	14.3995	5.79937	1.23e-12	1.23e-12	1.23e-12	20.6996	63.9453	72.9714	41.8599	11.1812	54.1446	1.23e-12
neg_1101	Kaempferol 3-O-[6-(4-coumaroyl)-beta-D-glucosyl-(1->2)-beta-D-glucosyl-(1->2)-beta-D-glucoside]	49.7	76.2	-4.5011	C42H46O23	953.208	0.605117	C12636	Flavone and flavonol biosynthesis(ko00944);;Biosynthesis of secondary metabolites(ko01110)	--	--	--	--	--	--	--	--	--	--	866.163	136.893	152.165	120.013	200.037	154.336	119.498	72.9875	635.971	384.416	868.509	195.072	321.213	249.936	245.42	187.276	1076.47	346.265	149.577	565.528
neg_11010	Pregnanediol	47.2	47.8	6.02402	C21H36O2	319.266	9.59452	C05484	Metabolic pathways(ko01100)	LMST02030202	Sterol Lipids [ST]	Steroids [ST02]	C21 steroids (gluco/mineralocorticoids, progestogins) and derivatives [ST0203]	HMDB0004025	80-92-2	Organic compounds	Lipids and lipid-like molecules	Steroids and steroid derivatives	Pregnane steroids	1647.8	29.9294	75.9833	32.1871	36.8627	10.7324	0.853005	0.0453742	45.9775	1.83982	6891.81	1402.74	2099.19	669.247	24.5391	0.967956	1109.3	1.23e-12	1.23e-12	1.23e-12
neg_11011	11-deoxy-16,16-dimethyl-PGE2	42.5	19.2	4.17407	C22H36O4	363.256	9.59452	--	--	LMFA03010062	Fatty Acyls [FA]	Eicosanoids [FA03]	Prostaglandins [FA0301]	--	--	--	--	--	--	53442.6	1282.38	2810.99	1152.07	1559.06	455.776	140.876	224.62	1553.6	279.165	197268	37170.5	55804.2	17020.3	1023.4	156.808	32961.1	183.45	76.9107	35.4349
neg_11016	Desacetoxyvindoline	41.9	27.8	-13.6831	C23H30N2O4	419.19	9.59452	C02673	Indole alkaloid biosynthesis(ko00901);;Metabolic pathways(ko01100);;Biosynthesis of secondary metabolites(ko01110)	--	--	--	--	HMDB0304331	--	Organic compounds	Alkaloids and derivatives	Plumeran-type alkaloids	--	135.635	1.23e-12	1.23e-12	1.23e-12	1.23e-12	1.23e-12	1.23e-12	1.23e-12	1.23e-12	1.23e-12	898.273	84.195	145.621	15.2319	1.23e-12	1.23e-12	50.0947	1.23e-12	1.23e-12	1.23e-12
neg_1102	Malvidin-3-(p-coumaroyl)-rutinoside-5-glucoside	44.7	74.5	20.1707	C44H51O23+	982.271	0.612267	C16296	Anthocyanin biosynthesis(ko00942)	LMPK12010393	Polyketides [PK]	Flavonoids [PK12]	Anthocyanidins [PK1201]	--	--	--	--	--	--	1449.72	1360.08	2259.44	1864.65	1722.91	1091.33	1096.62	1596.83	1211.51	1535.22	1918.76	2009.46	1797.82	1307.72	1130.85	976.151	878.503	1141.27	946.207	375.239
neg_11027	Ecliptasaponin A	48.4	55.5	3.57244	C36H58O9	633.403	9.58737	--	--	--	--	--	--	--	--	--	--	--	--	222.237	319.702	261.662	294.725	200.84	130.466	191.725	184.132	376.741	148.682	482.158	197.91	324.423	356.071	276.984	195.75	483.59	214.246	66.0562	457.081
neg_11033	Hopane-29-acetate	40.1	36.2	34.8274	C32H54O2	505.398	9.60167	C08627	Biosynthesis of various alkaloids(ko00996);;Biosynthesis of secondary metabolites(ko01110)	LMPR04000003	Prenol Lipids [PR]	Hopanoids [PR04]	--	--	--	--	--	--	--	415.327	443.859	643.782	659.751	788.142	424.959	462.725	581.852	325.636	170.141	125.712	172.329	229.692	244.619	908.79	295.758	240.348	95.3709	273.139	95.0114
neg_11044	Isoiridogermanal	48.1	53.3	-0.326579	C30H50O4	473.363	9.60882	--	--	--	--	--	--	--	--	--	--	--	--	88.1894	27.1979	111.714	34.7167	1.23e-12	19.1239	88.0582	103.032	15.8122	18.7287	181.932	397.107	842.576	1378.27	101.393	55.2564	114.126	536.657	95.2772	100.308
neg_11052	1-Monomyristin	41.8	38.4	-26.9067	C17H34O4	337.207	9.61597	--	--	--	--	--	--	HMDB0011561	--	Organic compounds	Lipids and lipid-like molecules	Glycerolipids	Monoradylglycerols	11815	5410.16	7619.15	5318.34	10939.6	6602.96	4330.95	5165.3	11551.4	7430.33	10689.8	7312.87	8971.58	7515.63	8588.39	5205.56	15448.7	5624.4	4805.49	8324.54
neg_11053	Adrenic acid	42.7	35.9	-1.67501	C22H36O2	353.246	9.61597	C16527	Biosynthesis of unsaturated fatty acids(ko01040)	LMFA01030178	Fatty Acyls [FA]	Fatty Acids and Conjugates [FA01]	Unsaturated fatty acids [FA0103]	HMDB0002226	28874-58-0	Organic compounds	Lipids and lipid-like molecules	Fatty Acyls	Fatty acids and conjugates	297.115	153.037	187.487	150.327	196.952	125.066	112.949	127.068	234.729	167.829	254.225	177.825	237.698	153.235	185.649	122.21	280.992	132.637	119.707	179.524
neg_11056	Timosaponin A1	46.1	52.6	-1.13962	C33H54O8	599.356	9.61597	--	--	--	--	--	--	--	--	--	--	--	--	17.6181	24.8399	57.055	28.9042	29.2274	100.021	53.7007	41.1574	49.6938	52.8122	32.2723	17.6744	20.4596	16.1122	37.4758	21.6688	200.137	80.0307	47.6787	11.2927
neg_11060	Fungichromin	46.3	51.4	15.5362	C35H58O12	705.373	9.62312	C13299	--	--	--	--	--	--	--	--	--	--	--	163.926	1092.8	378.886	1623.46	436.832	438.515	234.084	502.615	263.28	460.63	239.737	162.581	229.644	425.17	119.513	665.283	333.543	623.035	137.158	224.443
neg_11069	C-2 Ceramide	42.7	32.1	8.1689	C20H39NO3	340.289	9.64457	--	--	--	--	--	--	--	--	--	--	--	--	56.328	33.9815	59.7026	23.1157	41.9354	30.6601	21.9379	32.1918	45.7996	48.8127	51.9126	56.3076	64.6107	51.9224	59.041	35.0414	140.881	31.3326	31.9853	27.5936
neg_11072	Polyporenic acid C	47.5	68.9	21.9525	C31H46O4	517.32	9.65172	--	--	--	--	--	--	HMDB0256688	--	Organic compounds	Lipids and lipid-like molecules	Steroids and steroid derivatives	Bile acids, alcohols and derivatives	184.055	380.639	177.813	264.515	340.167	226.002	378.207	174.772	1437.75	1672.95	231.345	321.171	437.668	584.523	186.243	414.643	760.447	986.529	401.661	413.684
neg_11073	(9Z)-Hexadecenoic acid	42.2	13.1	-1.40908	C16H30O2	567.462	9.65172	C08362	Fatty acid biosynthesis(ko00061);;Metabolic pathways(ko01100)	--	--	--	--	HMDB0003229	373-49-9	Organic compounds	Lipids and lipid-like molecules	Fatty Acyls	Fatty acids and conjugates	416.603	172.69	270.559	160.149	240.833	359.403	126.373	231.609	206.147	80.91	402.309	125.613	101.27	172.965	406.737	176.179	447.539	291.154	182.851	36.4105
neg_11077	Sclareolide	41.9	32.3	-5.6522	C16H26O2	545.382	9.65887	--	--	--	--	--	--	HMDB0035293	564-20-5	Organic compounds	Organoheterocyclic compounds	Naphthofurans	--	1.23e-12	13.0765	29.2357	16.605	13.8117	19.4963	9.97916	16.9607	1.23e-12	1.23e-12	3.77518	1.84174	8.37515	5.14627	25.8142	20.6974	1.23e-12	1.48046	4.0107	1.23e-12
neg_1108	Biotinyl-5'-AMP	41.3	59.9	0.279908	C20H28N7O9PS	1191.28	0.619417	C05921	Biotin metabolism(ko00780);;Metabolic pathways(ko01100)	--	--	--	--	HMDB0004220	4130-20-5	Organic compounds	Nucleosides, nucleotides, and analogues	Purine nucleotides	Purine ribonucleotides	845.637	561.842	858.538	513.893	771.527	410.52	399.305	418.104	705.128	764.686	858.567	675.943	896.542	709.083	689.646	725.827	791.068	663.549	653.132	253.8
neg_11082	Acylated phloroglucinol	40.4	11.7	4.32381	C24H38O5	405.266	9.66602	--	--	--	--	--	--	--	--	--	--	--	--	4243.68	168.342	337.556	136.754	201.17	63.7355	46.0034	65.262	244.083	126.766	17053.5	3083.45	5543.88	2439.47	194.816	48.0552	3177.64	64.7807	21.6171	57.8813
neg_11083	Paxilline	46.2	45.2	9.05083	C27H33NO4	480.243	9.67317	C13782	Biosynthesis of secondary metabolites(ko01110)	--	--	--	--	HMDB0030323	57186-25-1	Organic compounds	Organoheterocyclic compounds	Naphthopyrans	--	1.23e-12	31.0825	104.635	20.4582	73.7713	29.4893	14.464	24.7464	0.671415	53.4763	107.735	121.822	111.158	155.541	229.723	140.56	208.399	90.0959	206.683	31.9944
neg_11084	Moronic acid	43.7	57.3	31.6244	C30H46O3	499.357	9.66602	--	--	LMPR0106150002	Prenol Lipids [PR]	Isoprenoids [PR01]	C30 isoprenoids (triterpenes) [PR0106]	HMDB0254888	--	Organic compounds	Lipids and lipid-like molecules	Prenol lipids	Triterpenoids	65.7094	330.49	502.79	351.856	296.098	641.069	624.758	1074.66	410.489	149.383	100.65	156.255	223.475	271.367	814.775	443.426	456.632	138.088	446.341	106.424
neg_11087	2,3,19-trihydroxyurs-12-en-28-oic acid (Euscaphic acid)	43.1	62	-8.49693	C30H48O5	533.344	9.66602	--	--	--	--	--	--	--	--	--	--	--	--	31.6114	125.708	202.377	139.885	139.593	351.005	354.43	539.015	143.478	64.9904	28.1386	68.7578	99.0121	159.361	329.067	197.572	120.668	68.7244	165.067	53.2541
neg_1109	L-Arabinono-1,4-lactone	47.2	66.1	31.1524	C5H8O5	147.035	0.619417	C01114	Ascorbate and aldarate metabolism(ko00053);;Metabolic pathways(ko01100)	--	--	--	--	--	--	--	--	--	--	420.752	159.565	118.362	109.366	156.244	155.044	113.477	123.513	235.661	275.182	264.765	149.765	175.606	188.799	127.164	110.268	356.109	145.008	165.476	231.549
neg_11100	Cyclooctatin	42.4	64.9	46.1969	C20H34O3	367.264	9.68032	C21979	Metabolic pathways(ko01100);;Biosynthesis of secondary metabolites(ko01110)	--	--	--	--	--	--	--	--	--	--	807.836	525.351	663.729	441.367	817.902	372.472	345.969	458.924	734.156	602.806	757.733	539.142	926.159	588.528	531.434	402.3	980.551	474.232	472.403	547.822
neg_11102	Glycodeoxycholic acid	52	71.7	-1.20991	C26H43NO5	470.288	9.68032	C05464	--	LMST05030006	Sterol Lipids [ST]	Steroid conjugates [ST05]	Glycine conjugates [ST0503]	HMDB0000631	360-65-6	Organic compounds	Lipids and lipid-like molecules	Steroids and steroid derivatives	Bile acids, alcohols and derivatives	103.488	325.703	643.697	249.862	652.544	113.368	109.168	148.828	98.9185	138.363	214.01	453.633	504.717	314.365	645.398	162.224	364.552	106.265	150.126	79.3124
neg_11110	Pregnan-20-one, 17-(acetyloxy)-3-hydroxy-6-methyl-, (3b,5b,6a)-	40	7.88	3.55725	C24H38O4	389.271	9.68747	--	--	--	--	--	--	--	--	--	--	--	--	4388.3	45.9961	101.61	123.445	30.3371	41.7008	20.234	9.47082	150.606	47.0335	23616.9	2064.05	3525.35	522.908	24.2729	11.227	4427.25	10.2907	10.7503	23.6633
neg_11117	(-)-Germacrene D	42.6	33.6	-11.2116	C15H24	467.385	9.70177	C16142	Sesquiterpenoid and triterpenoid biosynthesis(ko00909)	--	--	--	--	HMDB0302240	--	Organic compounds	Lipids and lipid-like molecules	Prenol lipids	Sesquiterpenoids	293.865	933.145	1757.02	1105.75	1024.34	751.841	570.304	1163.96	529.034	338.592	214.244	414.254	853.983	514.989	1568.73	522.961	570.799	154.932	521.613	140.53
neg_11123	4alpha-Carboxy-stigmasta-7,24(24(1))-dien-3beta-ol	47.7	64.3	18.4512	C30H48O3	501.367	9.70892	C22120	Steroid biosynthesis(ko00100);;Metabolic pathways(ko01100);;Biosynthesis of secondary metabolites(ko01110)	--	--	--	--	--	--	--	--	--	--	221.03	962.675	1972.96	1118.95	1295.85	651.211	481.232	840.133	514.929	347.073	93.3137	380.625	770.499	481.812	1250.76	316.067	367.565	141.567	332.87	88.5621
neg_11129	Arachidoyl glycine	41.3	12	3.51989	C22H43NO3	368.318	9.72322	--	--	--	--	--	--	--	--	--	--	--	--	948.704	7130.62	15771.9	6462.59	10131.8	3078.21	2299.22	4218.52	1644.56	2528.14	3559.34	9301.08	10145.1	7134.03	19082.4	4286.87	7231.66	2425.75	5392.05	1311.19
neg_11138	delta-Tocopherol	52	74.7	3.2857	C27H46O2	447.349	9.73037	C14151	Ubiquinone and other terpenoid-quinone biosynthesis(ko00130);;Metabolic pathways(ko01100);;Biosynthesis of secondary metabolites(ko01110);;Biosynthesis of cofactors(ko01240)	LMPR02020066	Prenol Lipids [PR]	Quinones and hydroquinones [PR02]	Vitamin E [PR0202]	HMDB0002902	119-13-1	Organic compounds	Lipids and lipid-like molecules	Prenol lipids	Quinone and hydroquinone lipids	110.863	67.762	283.969	18.5435	144.536	14.0694	418.348	22.4954	201.389	35.2353	766.677	531.964	887.036	2532.82	235.428	37.7559	55.3485	1251.02	31.5634	217.34
neg_11144	Mogroside I A1	47.2	56.4	-8.41279	C36H62O9	637.427	9.73752	--	--	--	--	--	--	--	--	--	--	--	--	305.232	476.227	341.58	582.6	184.36	115.467	195.723	132.96	177.5	122.931	1072.76	274.832	344.873	563.08	397.182	269.478	663.202	305.784	90.9973	717.844
neg_11152	6-Deoxocastasterone	43.7	39.9	10.2357	C28H50O4	485.345	9.7511	C15802	Brassinosteroid biosynthesis(ko00905);;Metabolic pathways(ko01100);;Biosynthesis of secondary metabolites(ko01110)	LMST01030127	Sterol Lipids [ST]	Sterols [ST01]	Ergosterols and C24-methyl derivatives [ST0103]	HMDB0033984	87833-54-3	Organic compounds	Lipids and lipid-like molecules	Steroids and steroid derivatives	Bile acids, alcohols and derivatives	908.374	375.647	1006.86	530.959	834.835	517.418	653.562	368.694	606.991	374.594	769.729	445.423	565.688	476.8	348.038	678.311	848.579	422.551	393.898	375.588
neg_11159	Centellasaponin B	40	60.4	-44.6616	C42H68O16	863.383	9.7511	--	--	--	--	--	--	HMDB0040123	386223-75-2	Organic compounds	Lipids and lipid-like molecules	Prenol lipids	Terpene glycosides	75.9992	416.21	528.541	132.436	78.5143	58.6941	67.9463	751.26	571.397	189.897	63.7846	567.443	1374.97	301.695	462.826	6.51949	113.263	278.588	453.507	718.286
neg_1118	Carbenicillin	48.4	68.5	13.2008	C17H18N2O6S	377.086	0.619417	C06869	--	--	--	--	--	HMDB0014717	4697-36-3	Organic compounds	Organic acids and derivatives	Carboxylic acids and derivatives	Amino acids, peptides, and analogues	160710	118893	154291	77967.8	191703	128469	100263	124999	106895	122529	135354	126854	146599	104427	109089	65059.7	76145.8	70622.4	62522.6	24646.2
neg_11189	Terpendole C	42.2	45.5	-3.25399	C32H41NO5	564.295	9.794	C20546	Biosynthesis of secondary metabolites(ko01110)	--	--	--	--	--	--	--	--	--	--	1.23e-12	17.2262	75.9044	13.2934	74.088	2.82434	6.50097	5.81983	1.40439	8.44041	12.574	46.1911	50.4692	31.2407	79.3841	12.1046	43.8258	13.8243	6.98693	1.23e-12
neg_11190	Euryalin A	41.4	22.2	6.45041	C31H38O10	569.243	9.794	--	--	--	--	--	--	--	--	--	--	--	--	1.23e-12	61.5034	212.04	55.3079	189.304	1.72917	3.86192	5.73416	1.23e-12	1.23e-12	10.0363	117.926	122.643	89.7781	230.981	13.1974	1.23e-12	1.23e-12	11.1565	1.23e-12
neg_11219	Sinapine	42	32.6	-13.4034	C16H24NO5+	355.159	9.80115	C00933	Phenylpropanoid biosynthesis(ko00940);;Biosynthesis of secondary metabolites(ko01110)	--	--	--	--	HMDB0029379	84123-22-8	Organic compounds	Phenylpropanoids and polyketides	Cinnamic acids and derivatives	Hydroxycinnamic acids and derivatives	8302.05	4365.92	8166.38	5652.13	6795.58	5294.78	5539.84	5281.48	13047.9	23123	23846.9	9199.86	14184.3	11911.9	4897.58	9577.59	34893.1	9333.22	3986.22	7377.49
neg_11249	Pinfaensic acid	41.2	48.1	34.1562	C30H46O6	547.345	9.80832	--	--	--	--	--	--	--	--	--	--	--	--	51.4608	122.731	228.269	75.2916	203.345	214.84	13.4146	14.9474	80.7635	149.683	70.2833	320.257	126.996	904.489	15.6243	1.92141	102.283	1.23e-12	1.23e-12	1.57468
neg_11262	22-Hydroxydocosanoate	49.5	55.6	1.18073	C22H44O3	355.322	9.82977	C19623	Cutin, suberine and wax biosynthesis(ko00073)	--	--	--	--	HMDB0304091	--	Organic compounds	Lipids and lipid-like molecules	Fatty Acyls	Fatty acids and conjugates	998.453	509.157	918.443	411.577	873.877	408.248	347.114	519.034	631.199	1068.84	2566.85	995.605	2433.34	877.502	1022.59	402.161	1465.8	464.111	355.404	250.348
neg_11268	Myristoleic acid	49	56.8	8.01492	C14H26O2	497.388	9.84407	C08322	--	LMFA01030051	Fatty Acyls [FA]	Fatty Acids and Conjugates [FA01]	Unsaturated fatty acids [FA0103]	HMDB0002000	544-64-9	Organic compounds	Lipids and lipid-like molecules	Fatty Acyls	Fatty acids and conjugates	14.3589	28.3704	66.6602	56.4671	54.8944	88.3013	72.6253	97.1648	29.2688	25.522	18.5944	32.8012	56.0404	59.5741	136.019	89.6619	89.4714	20.4713	62.8688	7.74524
neg_1127	Topotecan	46.7	75.1	-40.6026	C23H23N3O5	456.116	0.619417	C11158	--	--	--	--	--	HMDB0015164	119413-54-6	Organic compounds	Alkaloids and derivatives	Camptothecins	--	353.087	409.861	544.395	377.109	536.742	270.585	246.165	371.769	291.889	282.726	482.825	483.231	469.553	357.681	350.603	233.731	478.305	227.903	226.589	257.522
neg_11276	9-deoxy-9-methylene-16,16-dimethyl -PGE2	45	52.1	9.48105	C23H38O4	377.273	9.8512	--	--	LMFA03010059	Fatty Acyls [FA]	Eicosanoids [FA03]	Prostaglandins [FA0301]	--	--	--	--	--	--	45.1449	1.7393	5.28263	2.41808	9.21842	3.1132	1.17791	4.07739	7.95661	12.594	326.063	57.4486	97.04	36.2223	5.476	4.30885	74.417	20.4878	2.96267	10.1118
neg_11278	3alpha,7alpha,12alpha-Trihydroxy-5beta-cholestane	44.6	60.3	-2.92579	C27H48O3	441.334	9.8512	C05454	Metabolic pathways(ko01100)	--	--	--	--	HMDB0001457	547-96-6	Organic compounds	Lipids and lipid-like molecules	Steroids and steroid derivatives	Cholestane steroids	142.064	104.112	172.086	115.416	200.227	52.3406	179.348	72.1096	291.848	243.891	588.13	269.959	344.482	644.134	113.918	128.926	353.132	363.394	68.4565	183.431
neg_11279	Lupenone	46.2	45	7.43086	C30H48O	459.343	9.8512	C16990	--	--	--	--	--	HMDB0254213	--	Organic compounds	Lipids and lipid-like molecules	Prenol lipids	Triterpenoids	668.294	433.837	874.499	344.685	998.819	248.395	731.965	335.11	941.992	588	2888.01	1557.8	2132.44	4347.29	754.771	437.806	1204.23	2214.09	336.386	994.379
neg_1128	Picroside I	47.4	52.8	5.88042	C24H28O11	537.165	0.619417	--	--	--	--	--	--	HMDB0250017	--	Organic compounds	Phenylpropanoids and polyketides	Cinnamic acids and derivatives	Cinnamic acid esters	32552.2	29371.3	28404.7	45761.9	45571.5	16215.3	24004.9	18293.8	21507	16735.4	14327.5	32505	37886.5	30256.1	57797.3	7472.59	7736.98	6708.22	8906.4	2903.43
neg_11280	Pachymic acid	49.4	79.6	26.1663	C33H52O5	549.37	9.8512	C17044	--	--	--	--	--	HMDB0256070	--	Organic compounds	Lipids and lipid-like molecules	Prenol lipids	Triterpenoids	42.4811	185.509	463.325	227.2	264.915	254.491	159.536	329.553	108.038	60.7061	47.0783	64.6676	177.241	193.25	333.591	97.8329	123.809	23.4982	88.6623	23.6717
neg_11283	3,3',5,5'-Tetra-tert-butyl-4,4'-dihydroxybiphenyl	40.4	14.3	5.39567	C28H42O2	409.313	9.85835	--	--	--	--	--	--	--	--	--	--	--	--	756.504	297.103	877.149	215.041	573.129	287.112	336.833	414.181	493.502	391.412	960.114	579.799	667.514	381.747	627.664	335.13	2000.2	522.348	392.371	413.88
neg_11285	3beta-Hydroxy-4beta,14alpha-dimethyl-9beta,19-cyclo-5alpha-ergost-24(24(1))-en-4alpha-carboxylate	47.7	62.9	22.6258	C31H50O3	515.385	9.85835	C22116	Steroid biosynthesis(ko00100);;Metabolic pathways(ko01100);;Biosynthesis of secondary metabolites(ko01110)	--	--	--	--	--	--	--	--	--	--	114.239	882.425	2126.74	1370.2	1241.16	750.35	710.377	1377.72	374.165	176.05	85.2533	317.595	625.736	650.986	1969.29	550.728	416.842	139.167	401.506	53.0142
neg_11287	Glycosyl-4,4'-diaponeurosporenoate	46.1	68.3	-32.2673	C36H50O7	615.311	9.85835	--	--	--	--	--	--	--	--	--	--	--	--	1.09489	112.194	324.325	208.025	162.164	118.986	101.188	200.29	25.3415	13.3539	2.09084	33.2445	51.4962	103.641	305.405	64.687	20.389	3.97981	38.4432	0.156217
neg_11295	2-Carboxy-2,5-dihydro-5-oxofuran-2-acetate	47.6	65.4	-24.0247	C7H6O6	230.995	9.87982	C01278	Metabolic pathways(ko01100)	--	--	--	--	--	--	--	--	--	--	89337.9	54431.6	67437	50463.7	74410.8	38802	40133.9	45722.4	79996.9	61752.6	86825.5	64164.7	85603.9	58128.3	63571	42854.1	96288.9	50655	46693.4	67043.1
neg_11300	Dehydroascorbate	43.2	40.4	-19.285	C6H6O6	194.998	9.8941	C05422	Ascorbate and aldarate metabolism(ko00053);;Glutathione metabolism(ko00480);;Metabolic pathways(ko01100)	--	--	--	--	HMDB0001264	490-83-5	Organic compounds	Organoheterocyclic compounds	Lactones	Gamma butyrolactones	20325.9	12355.4	15203.4	11417.6	16963.1	8769.26	9062.25	10294.3	18037.9	13952.2	19512.2	14580.4	19497	13102.6	14428	9641.63	21767.8	11370.9	10474.1	15138.3
neg_11302	3,5,7-Trihydroxychromone	49.9	59.3	5.98842	C9H6O5	228.999	9.88695	--	--	--	--	--	--	--	--	--	--	--	--	94562.4	57533.9	71875.9	53634.3	78985.5	41351.7	42481.8	48847.5	84822.9	66422	92198	68457.2	91723.1	62111.8	68160.4	45728.3	102757	54058.7	49819.5	71420.7
neg_11317	Poricoic acid A	47.3	65.2	-1.03643	C31H46O5	543.35	9.8941	--	--	--	--	--	--	--	--	--	--	--	--	19.0638	14.3574	31.263	16.0977	22.7539	15.1571	17.0545	24.2388	18.4486	35.4245	31.1646	21.1998	48.9892	62.1095	23.7448	31.5717	50.6174	34.628	10.6555	9.60487
neg_11318	3-Ketoursolic acid	41.4	51	44.0997	C30H46O3	499.363	9.88695	--	--	--	--	--	--	--	--	--	--	--	--	3572.74	1558.53	4857.39	2094.37	3122.76	1948.56	2947.93	1355.61	2564.37	1494.99	2426.81	1662.6	1713.34	2023.85	879.145	2722.84	3775.04	1454.5	1197.19	1247
neg_11341	5-Hydroxyisourate	45.3	33.9	-2.80711	C5H4N4O4	218.994	9.90127	C11821	Purine metabolism(ko00230);;Metabolic pathways(ko01100)	--	--	--	--	HMDB0030097	151359-24-9	Organic compounds	Organoheterocyclic compounds	Imidazopyrimidines	Purines and purine derivatives	60641.6	36971.9	45959.6	34478.1	50669.4	26809.3	27197.9	31294.5	54453.5	42680.5	58917.7	43821.6	58639.3	39829.6	43958.7	29308	65699.4	34609.7	32014.8	45487.1
neg_11343	Naphthazarin	49.2	50.7	-1.86931	C10H6O4	235	9.90127	C01938	--	--	--	--	--	--	--	--	--	--	--	43253.9	26182.8	32756.3	24289.7	36057.3	18877	19535.2	21846.2	38269.3	29869.7	42232.5	30793.4	41274.4	27977.8	30565.1	20922.6	47112.7	24399	22487.5	32309.5
neg_11344	D-Galactaro-1,5-lactone	42.9	24.4	-3.34795	C6H8O7	236.997	9.90127	C20889	Ascorbate and aldarate metabolism(ko00053);;Metabolic pathways(ko01100)	--	--	--	--	--	--	--	--	--	--	30171.1	18265.5	22824.7	17133.2	25103.1	13175.1	13514	15381.9	27029.3	20993.3	29170.5	21439.3	28936.1	19706.5	21588.8	14529.7	32370.3	17156.3	15714.2	22508.5
neg_11347	D-Erythrose 4-phosphate	40.1	23.6	-15.8212	C4H9O7P	244.998	9.90127	C00279	Pentose phosphate pathway(ko00030);;Phenylalanine, tyrosine and tryptophan biosynthesis(ko00400);;Carbon fixation in photosynthetic organisms(ko00710);;Vitamin B6 metabolism(ko00750);;Metabolic pathways(ko01100);;Biosynthesis of secondary metabolites(ko01110);;Carbon metabolism(ko01200);;Biosynthesis of amino acids(ko01230);;Biosynthesis of cofactors(ko01240)	--	--	--	--	HMDB0001321	585-18-2	Organic compounds	Organic oxygen compounds	Organooxygen compounds	Carbohydrates and carbohydrate conjugates	37191.2	22770.8	28183.8	21196.9	31068.5	16218.6	16655.9	18968.7	33190.4	25713.5	36309.1	26611.5	35781	24295.3	26674.4	17945.6	40147.7	20970.3	19405.4	27887.2
neg_1135	Bilirubin beta-diglucuronide	45.1	69.4	-29.7933	C45H52N4O18	957.274	0.619417	C05787	Porphyrin metabolism(ko00860);;Metabolic pathways(ko01100);;Biosynthesis of secondary metabolites(ko01110)	--	--	--	--	--	--	--	--	--	--	1489.83	1245.68	2254.66	1420.43	2030.14	911.932	761.713	1159.4	2098.69	1167.38	1420.26	1066.25	1501.31	1053.9	2167.08	569.275	1151.36	518.149	517.641	769.561
neg_11353	2-Deoxy-D-ribose 5-phosphate	40.9	36.6	28.3531	C5H11O7P	249	9.90127	C00673	Pentose phosphate pathway(ko00030);;Metabolic pathways(ko01100)	--	--	--	--	HMDB0001031	102916-66-5	Organic compounds	Organic oxygen compounds	Organooxygen compounds	Carbohydrates and carbohydrate conjugates	27469.1	16603.5	20904.2	15598.7	22885.4	11952.1	12377.9	13972	24436.2	19128.7	26799.2	19493.2	26305	17983.2	19715.6	13182.3	29905.8	15485.9	14355.3	20558.2
neg_11365	6-Hydroxy-N-methylmyosmine	41.4	13.4	2.8154	C10H12N2O	351.184	9.90127	C21075	Nicotinate and nicotinamide metabolism(ko00760);;Metabolic pathways(ko01100)	--	--	--	--	--	--	--	--	--	--	271.525	77.1154	1.23e-12	4.1545	1.23e-12	1.23e-12	2.0215	1.69366	1.23e-12	1.11444	0.0817574	1.23e-12	209.717	332.643	6.49827	1.23e-12	1.23e-12	1.23e-12	1.23e-12	1.23e-12
neg_1137	Maltohexaose	50.6	79.2	10.7666	C36H62O31	1025.31	0.633717	C01936	--	--	--	--	--	HMDB0012253	34620-77-4	Organic compounds	Organic oxygen compounds	Organooxygen compounds	Carbohydrates and carbohydrate conjugates	407.282	444.315	967.797	474.703	1012.72	541.737	400.697	539.045	239.278	262.661	240.735	516.482	353.477	369.187	825.435	216.928	126.71	150.14	131.944	50.7805
neg_11372	Cyclo(Ser-Pro)	43.8	31.8	-5.42072	C8H12N2O3	413.166	9.90127	--	--	--	--	--	--	--	--	--	--	--	--	1.23e-12	4.89374	14.0614	8.42198	6.61833	1.23e-12	2.79254	7.02015	17.6709	71.3681	73.1258	18.2032	39.5052	28.1986	5.24255	32.6471	116.002	45.9925	23.3894	28.416
neg_1139	N6,N6,O-Tridemethylpuromycin-5'-phosphate	44.7	56.9	-9.0581	C19H24N7O8P	1063.27	0.633717	C07027	Metabolic pathways(ko01100);;Biosynthesis of secondary metabolites(ko01110)	--	--	--	--	--	--	--	--	--	--	170.837	129.154	116.866	99.396	174.312	143.709	124.809	108.617	183.796	194.822	135.149	123.435	166.088	185.748	166.915	103.908	164.346	96.307	98.6421	58.978
neg_11406	(S)-Malate	43.6	20.2	0.493466	C4H6O5	154.996	9.9084	C00149	Citrate cycle (TCA cycle)(ko00020);;Pyruvate metabolism(ko00620);;Glyoxylate and dicarboxylate metabolism(ko00630);;Carbon fixation in photosynthetic organisms(ko00710);;Metabolic pathways(ko01100);;Biosynthesis of secondary metabolites(ko01110);;Carbon metabolism(ko01200)	--	--	--	--	HMDB0000156	97-67-6	Organic compounds	Organic acids and derivatives	Hydroxy acids and derivatives	Beta hydroxy acids and derivatives	2232.46	1396	1753.09	1299.69	1840.58	995.39	1002.87	1188.15	2093.43	1712.89	2175.6	1700	2339.68	1518.18	1664.93	1068.99	2393.84	1341.21	1220.92	1707.07
neg_11411	3-(Imidazol-4-yl)-2-oxopropyl phosphate	47	46.9	-7.09349	C6H9N2O5P	240.998	9.9084	C01267	Histidine metabolism(ko00340);;Metabolic pathways(ko01100);;Biosynthesis of secondary metabolites(ko01110);;Biosynthesis of amino acids(ko01230)	--	--	--	--	HMDB0012236	99979-59-6	Organic compounds	Organic acids and derivatives	Organic phosphoric acids and derivatives	Phosphate esters	13826.5	8277.02	10485.8	7800.9	11506.1	6028.2	6132.56	6787.97	12135.1	9545.01	13565.5	9715.76	13160.4	8914.38	9725.21	6708.42	15220.3	7667.95	7125.02	10243
neg_11412	L-Xylulose 1-phosphate	44	47	18.9998	C5H11O8P	250.998	9.9084	C06441	Pentose and glucuronate interconversions(ko00040);;Metabolic pathways(ko01100)	--	--	--	--	--	--	--	--	--	--	20172.2	12133.9	15387	11399.9	16715	8746.76	9064.07	10128.2	17937.7	13990.1	19857.1	14222.1	19169.9	13173.2	14172.7	9813.76	21937.5	11303	10498.9	15064.3
neg_11413	3,5,9-Trihydroxy-7,8-dihydrocyclopenta[g]chromene-2,6-dione	42.7	46.1	-33.0903	C12H8O6	268.999	9.9084	--	--	--	--	--	--	--	--	--	--	--	--	2629.96	1602.29	2031.94	1441.52	2145.47	1148.12	1170.14	1309.51	2334.29	1817.13	2602.2	1890.7	2530.86	1741.67	1836.73	1292	2868.49	1527.59	1357.03	1945.14
neg_11414	L-Fucose 1-phosphate	42.8	39	-21.6112	C6H13O8P	278.999	9.9084	C02985	Fructose and mannose metabolism(ko00051);;Amino sugar and nucleotide sugar metabolism(ko00520);;Metabolic pathways(ko01100);;Biosynthesis of nucleotide sugars(ko01250)	--	--	--	--	HMDB0001265	16562-59-7	Organic compounds	Organic oxygen compounds	Organooxygen compounds	Carbohydrates and carbohydrate conjugates	2346.92	1382.06	1753.17	1277.84	1925.61	1009.41	1022.91	1174.41	2065.07	1590.1	2250.37	1598.37	2175.6	1479.79	1607.12	1117.82	2509.38	1297.17	1197.02	1703.31
neg_11426	3-Hydroxy-4H-pyran-4-one	43.6	40.5	16.2643	C5H4O3	132.993	9.9227	--	--	--	--	--	--	--	--	--	--	--	--	3124.96	1924.86	2401.22	1765.27	2595.54	1336.66	1383.19	1640.63	2869.89	2231.02	3014.38	2310.19	3056.17	2023.72	2309.28	1461.05	3266.28	1814.58	1650.76	2373.52
neg_11427	6-Hydroxycoumarin	46	33.7	1.17514	C9H6O3	197.001	9.91557	--	--	--	--	--	--	--	--	--	--	--	--	26509.5	16073.3	20118.6	14704.8	22092.8	11447	11901.2	13528.8	23558.3	18057.7	25534.5	19125.3	25293.7	17117.6	18588.4	12647.2	28573.4	14996.4	13831.2	19801.2
neg_11431	SQ 26180	46.5	43	2.15727	C6H10N2O6S	259.001	9.91557	C16842	Monobactam biosynthesis(ko00261)	--	--	--	--	--	--	--	--	--	--	15745.6	9452.09	11971.1	8771.64	13125.3	6825.82	7055.26	7854.32	13895.3	10742.1	15373.4	11180.8	15001.9	10094.4	10904.1	7636.92	17139.9	8814.35	8031.45	11584.4
neg_11432	D-Fructose 6-phosphate	45.7	52.9	-18.9944	C6H13O9P	280.999	9.91557	C00085	Galactose metabolism(ko00052);;Starch and sucrose metabolism(ko00500);;Carbon fixation in photosynthetic organisms(ko00710);;Metabolic pathways(ko01100);;Biosynthesis of secondary metabolites(ko01110);;Carbon metabolism(ko01200)	--	--	--	--	HMDB0304311	--	Organic compounds	Organic oxygen compounds	Organooxygen compounds	Carbohydrates and carbohydrate conjugates	8703.53	5324.42	6651.68	4832.83	7239.31	3783.96	3898.93	4376.44	7789.54	6156.14	8658.54	6248.64	8436.18	5707.9	6136.96	4280.89	9508.86	5012.7	4563.59	6543.52
neg_11437	5-hydroxymaltol	42.3	35	10.6781	C6H6O4	163.003	9.92985	--	--	--	--	--	--	HMDB0032988	1073-96-7	Organic compounds	Organoheterocyclic compounds	Pyrans	Pyranones and derivatives	7888.6	4805.12	5948.3	4461.71	6629.57	3394.17	3522.05	3934.69	6869.4	5405.83	7527.76	5654.47	7504.44	5031.71	5541.88	3708.33	8296.07	4467.5	4026.34	5852.28
neg_11443	2-Dehydro-3-deoxy-D-arabino-heptonate 7-phosphate	45.1	41.8	5.77448	C7H13O10P	309.001	9.94415	C04691	Phenylalanine, tyrosine and tryptophan biosynthesis(ko00400);;Metabolic pathways(ko01100);;Biosynthesis of secondary metabolites(ko01110);;Biosynthesis of amino acids(ko01230)	--	--	--	--	HMDB0304124	--	Organic compounds	Organic oxygen compounds	Organooxygen compounds	Carbohydrates and carbohydrate conjugates	47004.7	28466.3	35407	26907.8	39097.8	20217.7	21086.5	23251	40372.6	31968.7	45281.1	32771.6	43884.3	30085.5	33129.1	22460.5	50713.3	25877.8	23981	34602.4
neg_11444	L-Cysteate	42.9	28.8	3.87984	C3H7NO5S	337.003	9.93702	C00506	Cysteine and methionine metabolism(ko00270);;Taurine and hypotaurine metabolism(ko00430);;Metabolic pathways(ko01100)	--	--	--	--	HMDB0002757	498-40-8	Organic compounds	Organic acids and derivatives	Carboxylic acids and derivatives	Amino acids, peptides, and analogues	53942.5	32359.9	40615.8	30421.5	44897.4	23355.6	24180.5	26811.2	46743.8	36671.9	51896.8	37546.9	50739.1	34582.3	37998.7	25780.5	58601.9	29591.3	27532.8	39753.2
neg_11459	22alpha-Hydroxy-campesterol	43	31.5	2.97817	C28H48O2	461.365	9.97277	C15795	Brassinosteroid biosynthesis(ko00905);;Metabolic pathways(ko01100);;Biosynthesis of secondary metabolites(ko01110)	--	--	--	--	--	--	--	--	--	--	89.4227	35.1949	129.59	28.6563	99.1697	52.8768	268.898	45.2409	88.4725	74.4776	400.166	235.851	436.004	1003.45	118.167	77.0211	106.911	639.364	66.3116	211.683
neg_11466	(-)-trans-Isopiperitenol	44.7	33.4	5.64056	C10H16O	349.24	9.9942	C01123	Monoterpenoid biosynthesis(ko00902);;Biosynthesis of secondary metabolites(ko01110)	LMPR0102090006	Prenol Lipids [PR]	Isoprenoids [PR01]	C10 isoprenoids (monoterpenes) [PR0102]	--	--	--	--	--	--	43.3999	49.9279	486.418	14.7146	553.277	2.24505	4.85435	1.10987	5.26882	5.45048	734.666	461.893	54.5527	117.685	2.2875	7.41019	21.5608	17.5772	5.94274	2.30955
neg_11468	octadecanoic acid pyrrolidide	40.2	12.8	6.54717	C22H43NO	382.335	9.98707	--	--	--	--	--	--	--	--	--	--	--	--	1.32941	12.0356	46.5542	14.1443	25.7595	2.48915	2.94862	7.47309	1.23e-12	1.23e-12	5.01114	37.3403	21.4627	15.9008	83.1927	9.2034	17.9834	3.71846	15.3087	1.23e-12
neg_11474	Dihydrosphingosine-1-Phosphate	44.2	37.2	-2.84959	C18H40NO5P	821.54	9.98707	--	--	--	--	--	--	HMDB0001383	19794-97-9	Organic compounds	Lipids and lipid-like molecules	Sphingolipids	Phosphosphingolipids	3104.62	2069.28	3583.39	1206.68	7352.61	1989.76	5904.07	1450.1	8018.89	710.191	2927.5	5804.4	5156.26	1198.59	1575.14	4877.43	17969.3	7442.55	4965.35	2919.54
neg_1151	7-Methylxanthine	40.1	4.56	0.402542	C6H6N4O2	165.042	0.626567	C16353	Caffeine metabolism(ko00232);;Metabolic pathways(ko01100);;Biosynthesis of secondary metabolites(ko01110)	--	--	--	--	HMDB0001991	552-62-5	Organic compounds	Organoheterocyclic compounds	Imidazopyrimidines	Purines and purine derivatives	11367	3429.16	2422.55	2474.31	2511.76	2396.47	1579.06	1805.6	8630.81	6168.64	6961.21	2171.5	3868.74	2985.43	1333.49	1782.4	6546.65	2500.3	1953.86	6810.27
neg_1152	phosphoenol pyruvate	42.5	29.4	11.527	C3H5O6P	166.977	0.633717	--	--	--	--	--	--	--	--	--	--	--	--	28.4082	1.23e-12	1.23e-12	1.23e-12	1.23e-12	2.73813	1.23e-12	1.23e-12	31.4034	30.249	292.216	13.4417	1.23e-12	1.23e-12	1.23e-12	1.23e-12	94.0587	7.30238	1.23e-12	3.5508
neg_1153	α-D-Galacturonic acid	42.1	21.2	7.27866	C6H10O7	193.037	0.626567	--	--	--	--	--	--	HMDB0003363	9046-40-6	Organic compounds	Organic oxygen compounds	Organooxygen compounds	Carbohydrates and carbohydrate conjugates	4022.54	5147.88	12422.3	8231.84	8449.98	848.009	6127.09	1100.67	3760.49	2470.12	3106.88	6169.52	11730.1	4377.09	22194.1	639.211	1846.51	946.273	912.571	1342.88
neg_1163	(S)-DNPA	47.6	60.1	-7.85678	C16H14O5	571.128	0.633717	C12434	Metabolic pathways(ko01100);;Biosynthesis of secondary metabolites(ko01110)	--	--	--	--	--	--	--	--	--	--	1760.47	905.771	973.501	884.559	1254.5	682.576	753.737	858.836	1575.08	1236.22	2144.44	1226.21	1631.65	1238.15	1007.13	927.841	1754.42	1109.43	928.1	1137.91
neg_1167	Aucubin	48.9	78.6	6.51601	C15H22O9	367.103	0.633717	C09771	--	LMPR0102070006	Prenol Lipids [PR]	Isoprenoids [PR01]	C10 isoprenoids (monoterpenes) [PR0102]	HMDB0036562	479-98-1	Organic compounds	Lipids and lipid-like molecules	Prenol lipids	Terpene glycosides	967.621	346.381	215.36	264.132	306.011	238.623	211.756	239.029	790.836	552.81	624.569	277.972	635.697	337.856	596.844	309.474	1830.8	430.257	756.324	1281.51
neg_1168	2,3-Dehydro-UWM6	47.9	65.8	-20.8427	C19H16O5	369.091	0.626567	C18679	Biosynthesis of secondary metabolites(ko01110)	--	--	--	--	--	--	--	--	--	--	1372.36	679.092	571.031	459.264	791.502	347.453	312.249	389.221	1270.76	552.391	734.902	935.841	1081.96	664.884	505.994	190.87	1321.19	393.151	227.179	1352.95
neg_1170	Isopenicillin N	47.4	59.3	-3.49526	C14H21N3O6S	404.112	0.633717	C05557	Penicillin and cephalosporin biosynthesis(ko00311);;Metabolic pathways(ko01100);;Biosynthesis of secondary metabolites(ko01110)	--	--	--	--	HMDB0253667	--	Organic compounds	Organic acids and derivatives	Carboxylic acids and derivatives	Amino acids, peptides, and analogues	4352.8	2234.79	4468.67	2600.43	2750.11	1976.36	1725.03	2077.28	2273.37	2331.25	2827.05	1956.96	3041.59	1501.15	3039.58	1618.32	2858	2316.44	1560.91	1428.11
neg_1171	Asp-Nap-OH	41.8	17.8	-2.47626	C22H18N2O8	437.098	0.626567	--	--	--	--	--	--	--	--	--	--	--	--	1196.69	398.49	399.078	303.258	491.456	334.633	353.548	540.021	539.14	458.128	828.824	530.19	1082.68	550.377	592.359	390.286	757.882	546.503	406.693	364.19
neg_1177	5-Formiminotetrahydrofolate	50.6	77.4	7.90938	C20H24N8O6	517.161	0.626567	C00664	One carbon pool by folate(ko00670);;Metabolic pathways(ko01100)	--	--	--	--	HMDB0001534	2311-81-1	Organic compounds	Organoheterocyclic compounds	Pteridines and derivatives	Pterins and derivatives	16037	6353.9	12614.3	4854.24	10315.1	6377.63	4502.42	7743.69	11756.2	13959.3	18327.4	6722.77	13259.7	4813.86	7274.44	3062.34	5963.92	3425.96	4390.95	3192.43
neg_1178	Maltotriose	49.4	78.4	-15.1486	C18H32O16	549.165	0.633717	C01835	ABC transporters(ko02010)	--	--	--	--	HMDB0001262	1109-28-0	Organic compounds	Organic oxygen compounds	Organooxygen compounds	Carbohydrates and carbohydrate conjugates	15875.2	16722.2	37538.6	25049	23587.8	11542.7	10586.4	21820.6	12211.9	8631.21	11701.5	16375.1	17360.4	8777.15	26557.8	5826.57	8261.07	4443.69	5023.21	2694.3
neg_1179	Glaucarubin	48.3	63.2	-16.0982	C25H36O10	531.192	0.633717	C08760	--	--	--	--	--	HMDB0035626	1448-23-3	Organic compounds	Lipids and lipid-like molecules	Prenol lipids	Terpene lactones	414.438	299.458	455.779	323.962	329.519	323.549	222.284	372.9	273.457	373.143	288.362	353.232	327.758	270.687	279.463	215.009	244.111	223.576	285.454	146.495
neg_1180	Inosine	45.9	45.1	-8.04607	C10H12N4O5	535.15	0.626567	C00294	Purine metabolism(ko00230);;Metabolic pathways(ko01100);;Nucleotide metabolism(ko01232);;ABC transporters(ko02010)	--	--	--	--	HMDB0000195	58-63-9	Organic compounds	Nucleosides, nucleotides, and analogues	Purine nucleosides	--	5962.69	11914.1	34078.5	20184.5	19492.2	1561.36	17093	2463.61	5564.98	4844.22	2919.56	15788.3	19033.7	8243.63	44380.5	456.569	752.748	482.806	514.471	612.524
neg_1187	Sulfadoxin	45.1	42.6	-0.877361	C12H14N4O4S	665.145	0.633717	--	--	--	--	--	--	--	--	--	--	--	--	1059.05	482.35	883.291	514.438	943.449	446.629	298.331	505.426	872.745	1812.92	2146.83	1454.44	867.295	1875.08	1002.69	1208.11	710.811	1560.22	3129.2	429.217
neg_1190	Mudanoside A	45.2	46.8	-10.2016	C14H18O9	719.197	0.626567	--	--	--	--	--	--	--	--	--	--	--	--	9343.4	8990.72	12601.7	5546.76	14976.9	13557.9	8980.79	11182.1	5525.14	10227.6	7787.54	9898.06	6763.77	6377.25	6700.23	4238.34	1980.83	3960.87	3131.61	526.731
neg_1191	Specnuezhenide	46.2	65.6	-22.9715	C31H42O17	721.196	0.626567	--	--	--	--	--	--	HMDB0258412	--	Organic compounds	Lipids and lipid-like molecules	Saccharolipids	--	4636.97	4209.5	5739.22	2796.09	7107.11	6038.88	4108.12	5084.81	2924.15	4535.7	3808.49	4668.28	3605.48	3074.42	3566.45	2053.02	1417.41	1971.56	1552.82	536.543
neg_1193	9-amino-CPT	45	43.9	-3.65317	C20H17N3O4	771.239	0.626567	--	--	--	--	--	--	--	--	--	--	--	--	1181.18	598.514	991.284	620.528	1129.56	418.789	374.878	585.441	853.897	442.601	896.23	618.491	1182.62	546.741	1137.51	211.593	485.189	222.084	279.553	57.049
neg_1199	Landomycin H	46.2	62.4	-23.5818	C25H24O8	903.266	0.633717	C18683	Biosynthesis of secondary metabolites(ko01110)	--	--	--	--	--	--	--	--	--	--	892.671	1229.75	1990.09	1538	1748.46	2205.01	1561	1906.17	552.762	750.066	674.727	1684.05	525.231	641.027	764.585	782.344	222.625	273.086	436.629	62.4879
neg_1201	Delphinidin-3-(p-coumaroyl)-rutinoside-5-glucoside	43.6	47.4	-0.593138	C42H47O23+	918.243	0.626567	C16294	Anthocyanin biosynthesis(ko00942)	--	--	--	--	--	--	--	--	--	--	1341.81	405.542	218.611	299.858	555.132	235.019	150.913	276.005	803.199	743.24	1831.62	1210.53	1716.3	602.934	344.526	606.39	709.368	720.68	696.673	196.095
neg_1208	UDP-N-acetylmuramoyl-L-alanyl-gamma-D-glutamyl-L-lysine	42.7	59.4	-8.4504	C34H55N7O24P2	1052.27	0.640867	C05892	Metabolic pathways(ko01100)	--	--	--	--	--	--	--	--	--	--	86.4087	81.0746	106.14	60.7114	91.8779	81.0974	74.4048	79.1938	93.1429	80.4443	66.7167	63.7379	55.2353	82.7335	69.3478	64.5656	79.6451	50.4812	58.4932	14.9682
neg_1212	L-Aspartate 4-semialdehyde	41.3	26.2	15.143	C4H7NO3	116.037	0.640867	C00441	Glycine, serine and threonine metabolism(ko00260);;Monobactam biosynthesis(ko00261);;Cysteine and methionine metabolism(ko00270);;Lysine biosynthesis(ko00300);;Arginine and proline metabolism(ko00330);;Phenylalanine, tyrosine and tryptophan biosynthesis(ko00400);;Metabolic pathways(ko01100);;Biosynthesis of secondary metabolites(ko01110);;2-Oxocarboxylic acid metabolism(ko01210);;Biosynthesis of …	--	--	--	--	--	--	--	--	--	--	190.829	58.4023	40.5362	32.7669	143.863	57.9261	43.7118	44.0701	166.988	135.509	281.497	111.355	189.94	73.3565	45.7067	118.618	337.299	116.523	141.054	137.603
neg_1216	Threonate	48.7	56.7	9.28731	C4H8O5	135.031	0.640867	C01620	Ascorbate and aldarate metabolism(ko00053);;Metabolic pathways(ko01100)	--	--	--	--	HMDB0000943	7306-96-9	Organic compounds	Organic oxygen compounds	Organooxygen compounds	Carbohydrates and carbohydrate conjugates	643.046	351.551	392.769	138.429	178.617	348.121	141.143	399.806	313.588	314.232	352.88	301.911	324.706	351.389	210.55	249.469	645.047	383.295	423.364	586.926
neg_1217	2-epi-5-epi-Valiolone	52.6	73.5	7.50407	C7H12O6	191.058	0.640867	C17691	Metabolic pathways(ko01100);;Biosynthesis of secondary metabolites(ko01110)	--	--	--	--	--	--	--	--	--	--	2143.5	2502.77	1220.81	369.16	901.889	2798.79	614.128	2119.78	1425.59	1207.2	2216.96	1764.94	871.183	1242.28	295.472	1587.81	2549.97	3179.36	3414.65	1772.71
neg_1218	Biopterin	49.9	55	1.04859	C9H11N5O3	533.16	0.640867	C06313	Folate biosynthesis(ko00790);;Metabolic pathways(ko01100);;Biosynthesis of cofactors(ko01240)	--	--	--	--	HMDB0000468	22150-76-1	Organic compounds	Organoheterocyclic compounds	Pteridines and derivatives	Pterins and derivatives	6097.94	4230.61	3990.12	2251.51	5337.76	5210.99	2804.51	4351.8	5223.07	5288.11	8082.54	5716.02	5633.51	3373.78	3059.52	3895.4	7592.68	4434.23	4365.64	3221.08
neg_1219	N-Acetyl-D-glucosamine	46.5	62.6	13.1397	C8H15NO6	256.062	0.640867	C00140	Amino sugar and nucleotide sugar metabolism(ko00520);;Metabolic pathways(ko01100);;Biosynthesis of nucleotide sugars(ko01250);;ABC transporters(ko02010)	--	--	--	--	HMDB0000215	7512-17-6	Organic compounds	Organic oxygen compounds	Organooxygen compounds	Carbohydrates and carbohydrate conjugates	1229.91	257.878	225.549	156.822	536.373	224.012	141.197	144.516	613.201	518.811	854.348	357.305	1207.63	383.544	199.386	248.276	1410.26	434.518	319.096	444.829
neg_1220	Pseudouridine 5'-phosphate	45.3	36.3	6.39597	C9H13N2O9P	323.031	0.640867	C01168	Pyrimidine metabolism(ko00240);;Metabolic pathways(ko01100)	--	--	--	--	HMDB0001271	1157-60-4	Organic compounds	Organic oxygen compounds	Organooxygen compounds	Carbohydrates and carbohydrate conjugates	1615.46	562.287	398.49	524.872	707.051	692.887	412.123	429.43	1370.87	2929.44	3957.78	1984.85	1216.85	3096.43	721.506	1767.32	1941.83	2773.74	4718.26	2061.44
neg_1226	TyrMe-Asp-OH	40.3	22.2	-11.4037	C20H20N2O9	431.105	0.640867	--	--	--	--	--	--	--	--	--	--	--	--	9591.45	11791.2	9574.99	5963.57	5540.75	2047.79	1476.9	1640.8	2929.71	4248.96	5377.57	4988.69	2963.15	5973.58	1282.86	1186.87	3766.77	2115.78	886.145	1484.21
neg_1227	5,10-Methylenetetrahydrofolate	46.8	63.2	-3.36615	C20H23N7O6	456.162	0.640867	C00143	Glycine, serine and threonine metabolism(ko00260);;One carbon pool by folate(ko00670);;Metabolic pathways(ko01100);;Carbon metabolism(ko01200);;Biosynthesis of cofactors(ko01240)	--	--	--	--	HMDB0304209	--	Organic compounds	Organoheterocyclic compounds	Pteridines and derivatives	Pterins and derivatives	1307.16	1336.27	1535	1286.44	1492.76	1137.87	1008.31	1441.74	924.821	856.878	1575.85	1862.43	1468.77	1200.72	1578.67	1027.89	1288.68	861.475	966.246	725.502
neg_1228	Acegastrodine	47.4	50.9	2.28864	C21H26O11	499.147	0.640867	--	--	--	--	--	--	--	--	--	--	--	--	3787.47	2479.95	4435.02	2600.77	3037.7	2272.13	1816.65	3288.04	2651.83	2130.77	6190.21	9812.74	3492.9	2080.52	2514.47	1967.27	2484.22	1486.42	1675.86	2337.13
neg_1238	UDP-3-O-(3-hydroxytetradecanoyl)-N-acetylglucosamine	41.3	50.7	-8.0769	C31H53N3O19P2	868.238	0.640867	C04738	Metabolic pathways(ko01100)	--	--	--	--	--	--	--	--	--	--	627.295	316.968	444.863	215.218	503.373	504.8	342.661	500.653	465.168	639.513	565.653	421.563	382.781	375.398	439.032	260.368	373.337	258.594	349.215	59.4314
neg_1244	3,5,7-Trioxododecanoyl-CoA	43.3	55.5	16.1255	C33H52N7O20P3S	990.229	0.640867	C20413	Biosynthesis of various plant secondary metabolites(ko00999);;Metabolic pathways(ko01100);;Biosynthesis of secondary metabolites(ko01110)	LMFA07050199	Fatty Acyls [FA]	Fatty esters [FA07]	Fatty acyl CoAs [FA0705]	--	--	--	--	--	--	56.289	2.08455	42.543	11.2893	30.1882	34.0489	9.84746	21.387	72.4845	58.1451	77.714	32.2758	43.0235	47.4365	32.1635	60.5306	76.183	77.151	72.8541	16.3216
neg_1247	trans-2-Enoyl-OPC6-CoA	48.8	72.5	4.82364	C37H58N7O18P3S	1048.25	0.648017	C16332	alpha-Linolenic acid metabolism(ko00592);;Metabolic pathways(ko01100);;Biosynthesis of secondary metabolites(ko01110)	LMFA07050381	Fatty Acyls [FA]	Fatty esters [FA07]	Fatty acyl CoAs [FA0705]	HMDB0011121	--	Organic compounds	Lipids and lipid-like molecules	Fatty Acyls	Fatty acyl thioesters	554.015	103.841	246.55	96.0063	299.196	139.812	87.6475	163.252	489.253	338.945	387.147	142.422	173.179	170.225	141.942	87.0482	344.973	172.791	191.508	125.399
neg_1250	D-Xylose	52.9	24.2	11.347	C5H10O5	149.047	0.648017	C00181	Pentose and glucuronate interconversions(ko00040);;Amino sugar and nucleotide sugar metabolism(ko00520);;Metabolic pathways(ko01100);;ABC transporters(ko02010)	--	--	--	--	HMDB0000098	58-86-6	Organic compounds	Organic oxygen compounds	Organooxygen compounds	Carbohydrates and carbohydrate conjugates	1047.85	301.397	322.559	242.023	332.1	228.034	168.204	219.869	1010.64	767.101	624.166	198.119	391.977	246.505	140.846	137.707	820.606	184.84	202.769	378.665
neg_1254	Dictangustine A	40.3	44.1	-33.8752	C12H9NO3	236.026	0.648017	--	--	--	--	--	--	--	--	--	--	--	--	117.953	73.1353	66.9536	76.9532	85.3008	62.9062	38.2644	48.3228	52.1727	106.963	54.2515	48.1962	24.932	43.5871	23.2115	36.7785	103.988	47.0945	65.3079	79.824
neg_1257	Deoxyshikonin	43.9	39.8	-3.96693	C16H16O4	317.102	0.648017	C18133	Ubiquinone and other terpenoid-quinone biosynthesis(ko00130);;Biosynthesis of secondary metabolites(ko01110)	--	--	--	--	--	--	--	--	--	--	941.631	340.805	368.426	392.474	368.798	324.219	370.137	371.857	501.289	437.571	768.494	403.128	675.313	482.189	439.435	584.266	840.887	591.225	570.898	476.99
neg_1258	6,7-Dimethyl-8-(D-ribityl)lumazine	51.7	73.1	10.6575	C13H18N4O6	371.124	0.648017	C04332	Riboflavin metabolism(ko00740);;Metabolic pathways(ko01100);;Biosynthesis of secondary metabolites(ko01110);;Biosynthesis of cofactors(ko01240)	--	--	--	--	HMDB0003826	2535-20-8	Organic compounds	Organoheterocyclic compounds	Pteridines and derivatives	--	860	227.717	273.691	247.356	306.636	291.867	298.116	356.414	664.631	386.252	785.078	405.691	632.72	348.042	497.086	341.747	742.747	387.05	432.692	402.95
neg_1261	cis-(Homo)3-aconitate	43	59.5	48.145	C9H12O6	491.161	0.648017	C20582	Metabolic pathways(ko01100);;2-Oxocarboxylic acid metabolism(ko01210)	--	--	--	--	--	--	--	--	--	--	1180.32	573.938	867.281	584.217	656.859	668.747	498.724	736.493	1000.64	1227.67	881.13	646.474	652.398	443.114	548.913	373.56	594.845	340.423	384.46	222.255
neg_1267	5'-Deoxy-5'-(methylthio)adenosine	40.6	69	22.8232	C11H15N5O3S	653.207	0.648017	C00170	Cysteine and methionine metabolism(ko00270);;Zeatin biosynthesis(ko00908);;Metabolic pathways(ko01100)	--	--	--	--	HMDB0001173	2457-80-9	Organic compounds	Nucleosides, nucleotides, and analogues	5'-deoxyribonucleosides	5'-deoxy-5'-thionucleosides	1249.07	635.738	737.173	723.655	727.225	631.623	841.668	858.705	1124.32	1175.03	1379.77	985.441	991.461	602.435	990.37	550.395	978.788	567.267	572.675	351.653
neg_1270	Tenaxin I	40.3	55.9	18.9837	C18H16O7	733.19	0.648017	--	--	LMPK12111425	Polyketides [PK]	Flavonoids [PK12]	Flavones and Flavonols [PK1211]	--	--	--	--	--	--	549.165	720.8	990.714	932.576	1151.98	777.056	806.046	958.192	398.173	416.861	785.437	656.548	758.803	567.933	1128.31	478.516	335.577	358.656	444.683	124.762
neg_1274	Crotonoyl-CoA	40.5	54.1	-24.495	C25H40N7O17P3S	834.114	0.648017	C00877	Fatty acid degradation(ko00071);;Lysine degradation(ko00310);;Tryptophan metabolism(ko00380);;Glyoxylate and dicarboxylate metabolism(ko00630);;Butanoate metabolism(ko00650);;Metabolic pathways(ko01100);;Biosynthesis of secondary metabolites(ko01110);;Carbon metabolism(ko01200);;Fatty acid metabolism(ko01212)	LMFA07050307	Fatty Acyls [FA]	Fatty esters [FA07]	Fatty acyl CoAs [FA0705]	HMDB0002009	38795-21-0	Organic compounds	Lipids and lipid-like molecules	Fatty Acyls	Fatty acyl thioesters	188.809	268.367	232.391	161.182	285.059	30.6205	65.3208	50.1741	168.706	167.931	128.862	202.689	273.695	145.717	104.144	115.239	125.668	148.39	112.217	86.4466
neg_1283	N-[(7,8-Dihydropterin-6-yl)methyl]-4-(beta-D-ribofuranosyl)aniline 5'-phosphate	47.4	78.4	-17.4611	C18H23N6O8P	1023.26	0.662317	C20562	Folate biosynthesis(ko00790);;Biosynthesis of cofactors(ko01240)	--	--	--	--	--	--	--	--	--	--	397.842	397.728	681.584	403.444	711.302	319.9	284.649	321.671	324.177	225.987	244.835	362.662	344.063	344.759	812.963	119.126	140.049	122.026	154.443	77.9513
neg_1291	Orotic acid	43	18.5	-1.28401	C5H4N2O4	155.01	0.662317	C00295	Pyrimidine metabolism(ko00240);;Metabolic pathways(ko01100);;Biosynthesis of cofactors(ko01240)	--	--	--	--	HMDB0000226	65-86-1	Organic compounds	Organoheterocyclic compounds	Diazines	Pyrimidines and pyrimidine derivatives	395.84	333.454	1497.57	403.514	906.205	156.316	181.393	143.627	191.196	267.041	2923.4	2025.49	965.165	1308.22	234.997	163.492	478.423	211.493	131.408	245.564
neg_1292	Lumazine	42.2	22.8	3.91935	C6H4N4O2	163.027	0.662317	C03212	--	--	--	--	--	HMDB0254198	--	Organic compounds	Organoheterocyclic compounds	Pteridines and derivatives	--	173.003	76.2849	65.6889	142.855	114.168	68.7464	67.3583	62.4975	229.363	145.333	156.789	146.322	147.494	130.026	193.964	80.2869	186.564	102.803	97.3551	220.164
neg_1294	L-Sorbose	41.4	24.1	8.36349	C6H12O6	179.058	0.662317	C00247	Fructose and mannose metabolism(ko00051);;Metabolic pathways(ko01100)	--	--	--	--	HMDB0001266	470-15-5	Organic compounds	Organic oxygen compounds	Organooxygen compounds	Carbohydrates and carbohydrate conjugates	8598.91	2453.76	3512.62	2868.04	2860.25	2673.6	2075.81	2266.48	5869.34	5452.06	3259.03	1846.14	2930.85	1878.51	1528.82	1409.3	4629.3	1681.75	1752.96	2424.18
neg_1304	Melibiitol	43.7	57.4	9.67959	C12H24O11	365.11	0.655167	C05399	Galactose metabolism(ko00052)	--	--	--	--	HMDB0006791	--	Organic compounds	Lipids and lipid-like molecules	Fatty Acyls	Fatty acyl glycosides	403.041	122.033	98.1156	66.8499	135.589	123.262	77.6389	168.85	326.12	165.91	372.176	122.131	336.276	160.048	119.141	202.22	619.814	229.275	266.819	355.848
neg_1308	Theaflavic acid	41.3	25.3	7.70738	C21H16O10	427.07	0.655167	--	--	--	--	--	--	HMDB0040609	30407-93-3	Organic compounds	Phenylpropanoids and polyketides	Flavonoids	Flavans	669.455	901.717	660.2	364	435.727	666.554	874.404	1177.5	1356.75	1059.18	2423.84	904.831	1614.38	880.88	1227.28	1181.45	1404.87	798.364	880.531	1543.54
neg_1311	Daphylloside	49.6	79.6	-3.42854	C19H26O12	467.116	0.655167	--	--	--	--	--	--	--	--	--	--	--	--	1406.15	699.753	536.178	543.76	625.657	455.412	389.304	435.998	1944.22	1440.48	2505.3	1815.13	1358.79	1261.35	630.426	452.36	1971.69	611.288	476.727	920.973
neg_1314	Folate	47.6	79.1	19.4308	C19H19N7O6	486.146	0.662317	C00504	One carbon pool by folate(ko00670);;Folate biosynthesis(ko00790);;Metabolic pathways(ko01100);;Biosynthesis of cofactors(ko01240)	--	--	--	--	HMDB0000121	59-30-3	Organic compounds	Benzenoids	Phenols	Methoxyphenols	156.7	170.833	176.64	176.414	150.901	222.357	176.915	213.636	103.83	230.848	162	292.605	181.394	121.136	184.397	137.383	103.808	103.16	120.867	35.0765
neg_1318	Didymin	47.1	68.3	18.6977	C28H34O14	629.175	0.655167	--	--	LMPK12140337	Polyketides [PK]	Flavonoids [PK12]	Flavanones [PK1214]	HMDB0029482	14259-47-3	Organic compounds	Phenylpropanoids and polyketides	Flavonoids	Flavonoid glycosides	463.012	334.745	366.468	328.661	298.104	276.83	304.221	370.458	373.705	281.669	625.881	647.961	500.481	607.72	607.403	232.466	191.241	193.75	179.535	95.1282
neg_1324	Podophyllotoxin	43	51.6	6.317	C22H22O8	873.266	0.662317	C10874	Biosynthesis of various plant secondary metabolites(ko00999);;Metabolic pathways(ko01100);;Biosynthesis of secondary metabolites(ko01110)	--	--	--	--	HMDB0015310	477-47-4	Organic compounds	Lignans, neolignans and related compounds	Lignan lactones	Podophyllotoxins	558.137	412.624	1304.82	515.154	1093.3	477.765	372.822	542.161	513.776	275.579	384.061	402.333	493.608	424.395	1233.34	196.958	291.399	223.753	98.5806	237.951
neg_1329	Succinate	43.6	37.8	14.8766	C4H6O4	152.998	0.669467	C00042	Citrate cycle (TCA cycle)(ko00020);;Oxidative phosphorylation(ko00190);;Alanine, aspartate and glutamate metabolism(ko00250);;Lysine degradation(ko00310);;Tyrosine metabolism(ko00350);;Phenylalanine metabolism(ko00360);;Pyruvate metabolism(ko00620);;Glyoxylate and dicarboxylate metabolism(ko00630);;Propanoate metabolism(ko00640);;Butanoate metabolism(ko00650);;Nicotinate and nicotinamide metaboli…	--	--	--	--	HMDB0000254	110-15-6	Organic compounds	Organic acids and derivatives	Carboxylic acids and derivatives	Dicarboxylic acids and derivatives	292.562	212.238	292.625	213.124	207.775	92.0486	91.7147	84.456	210.734	142.943	513.302	417.066	292.725	398.401	165.238	116.248	197.028	97.9997	123.19	179.141
neg_1330	Imidazole-4-acetate	44.7	46.4	18.2635	C5H6N2O2	297.12	0.669467	C02835	Histidine metabolism(ko00340);;Metabolic pathways(ko01100)	--	--	--	--	HMDB0002024	645-65-8	Organic compounds	Organoheterocyclic compounds	Azoles	Imidazoles	1278.09	775.399	706.571	654.568	599.253	273.216	378.073	318.355	1087.27	749.279	1183.39	1198.45	1305.35	1145.98	1505.74	423.313	1288.06	480.251	396.667	565.77
neg_1331	4-Oxoglutaramate	46	51.4	14.3472	C5H7NO4	144.032	0.669467	C05572	Histidine metabolism(ko00340)	--	--	--	--	--	--	--	--	--	--	268.476	67.2179	68.7954	51.1309	93.535	77.1017	56.3095	88.7202	174.343	179.744	253.492	127.645	257.53	121.668	108.608	83.7167	377.682	124.97	127.197	143.27
neg_1332	D-Pinitol	40.6	16.6	8.77572	C7H14O6	193.073	0.669467	C03844	--	--	--	--	--	HMDB0034219	10284-63-6	Organic compounds	Organic oxygen compounds	Organooxygen compounds	Alcohols and polyols	923.284	75.8084	94.4028	116.117	172.875	119.927	121.237	114.867	824.8	690.59	142.921	16.0049	69.49	27.0073	4.77279	12.5438	228.592	33.8342	39.7034	48.7838
neg_1333	Regiolone	45	41.5	10.426	C10H10O3	199.04	0.669467	--	--	--	--	--	--	--	--	--	--	--	--	19927.7	16258.1	26888.3	14870.6	15298.4	1176.61	858.214	732.882	11019.9	2208.21	42979.3	37703.7	22408.8	37198.7	12969.2	1052.07	8501.18	1228.93	665.754	2318.88
neg_1335	2-Deoxy-scyllo-inosose	41.5	10.5	0.38969	C6H10O5	207.051	0.669467	C17209	Neomycin, kanamycin and gentamicin biosynthesis(ko00524);;Biosynthesis of secondary metabolites(ko01110)	--	--	--	--	--	--	--	--	--	--	438.567	174.332	167.356	198.443	240.114	151.957	137.336	151.8	295.766	308.309	523.467	321.098	340.661	258.528	249.694	231.093	433.662	301.13	270.002	290.677
neg_134	2-Chloro-3-oxoadipate	43.8	54.2	19.1528	C6H7ClO5	228.971	0.519317	C12836	Metabolic pathways(ko01100)	--	--	--	--	--	--	--	--	--	--	148.702	128.803	101.807	101.417	160.278	100.33	101.683	103.425	137.891	183.908	22.1455	15.7259	40.0428	105.992	64.4503	155.416	55.5978	157.915	144.981	257.386
neg_1345	Matairesinol-4'-O-glucoside (Matairesinoside)	45.5	70.7	-38.5276	C26H32O11	541.149	0.669467	--	--	--	--	--	--	--	--	--	--	--	--	20777.9	30381.4	55460.9	27279.6	32911.2	7549.69	4692.28	6736.18	11527.9	4782.31	34560.2	66200.1	23988.6	39466.7	22945.2	2657.36	5514.66	2206.06	1671.53	1185.77
neg_1350	UDP-2,4-bis(acetamido)-2,4,6-trideoxy-beta-L-altropyranose	43.6	58.6	-42.6118	C19H30N4O16P2	677.084	0.669467	C19971	Amino sugar and nucleotide sugar metabolism(ko00520);;Metabolic pathways(ko01100);;Biosynthesis of nucleotide sugars(ko01250)	--	--	--	--	--	--	--	--	--	--	315.987	150.153	215.352	68.7951	117.496	15.3569	3.78237	8.83965	257.019	86.5261	576.969	486.526	210.911	558.792	51.7181	12.4582	130.725	39.7372	11.4047	87.1208
neg_1352	Tenuifoliside A	49.4	77.2	20.7751	C31H38O17	703.2	0.669467	--	--	--	--	--	--	--	--	--	--	--	--	2971.63	3219.21	7973.83	3632.02	3464.96	1073.47	1057.88	1172.28	1951.64	812.994	3339.48	5474.89	3199.28	3548.82	3937.32	872.401	1237.02	640.021	751.187	207.938
neg_1353	158932-33-3	45.5	45	2.64686	C32H46O16	707.255	0.669467	--	--	--	--	--	--	--	--	--	--	--	--	359.329	559.377	720.245	687.05	678.991	481.645	673.721	852.844	292.345	250.969	428.549	463.621	463.794	329.449	765.675	435.585	181.829	216.854	399.996	72.6779
neg_1356	Portulacaxanthin II	44.6	60.6	-13.0826	C18H18N2O7	807.227	0.669467	C08565	Betalain biosynthesis(ko00965);;Biosynthesis of secondary metabolites(ko01110)	--	--	--	--	HMDB0012281	--	Organic compounds	Organic acids and derivatives	Carboxylic acids and derivatives	Amino acids, peptides, and analogues	193.279	274.191	291.738	165.666	346.66	198.208	170.124	244.844	255.079	109.953	195.994	203.119	223.456	231.967	321.536	100.21	134.293	107.822	162.221	22.3415
neg_1373	L-Dihydroorotic Acid	41	47.9	40.8836	C5H6N2O4	157.032	0.683767	C00337	Pyrimidine metabolism(ko00240);;Metabolic pathways(ko01100);;Biosynthesis of cofactors(ko01240)	--	--	--	--	HMDB0003349	5988-19-2	Organic compounds	Organic acids and derivatives	Carboxylic acids and derivatives	Amino acids, peptides, and analogues	666.208	126.984	332.766	133	292.483	125.587	80.5625	161.792	423.806	216.808	2131.32	1706.92	471.702	352.081	143.131	108.922	862.732	146.247	144.911	238.475
neg_1374	3,4-Dihydroxyphenyl ethanol	45.3	52.2	14.3232	C8H10O3	175.04	0.676617	--	--	--	--	--	--	--	--	--	--	--	--	1135.64	517.916	874.667	449.213	1087.36	483.42	707.539	507.263	846.356	866.769	4271.91	1835.21	1187.56	530.133	563.505	304.932	961.35	326.589	550.199	733.08
neg_1375	4-Imidazolone-5-acetate	47.8	56.8	12.4569	C5H6N2O3	187.038	0.683767	C05133	Histidine metabolism(ko00340);;Metabolic pathways(ko01100)	--	--	--	--	--	--	--	--	--	--	237.365	80.3991	93.8703	78.3499	86.4841	57.9367	62.1678	56.7354	132.226	83.8352	205.877	129.419	191.909	99.081	97.0583	41.8881	213.294	60.3951	57.0492	51.8117
neg_1378	Prolyl-Serine	45.2	42.9	11.8386	C8H14N2O4	201.09	0.683767	--	--	--	--	--	--	HMDB0029026	--	Organic compounds	Organic acids and derivatives	Carboxylic acids and derivatives	Amino acids, peptides, and analogues	20.3725	22.2494	9.28419	79.4757	26.0447	29.6748	81.2711	43.8677	50.7946	22.2691	6.91971	6.27174	75.8095	13.1145	281.046	34.8923	56.2632	20.4012	49.1949	21.3742
neg_1380	Pro-Asn	43.1	30.9	8.62655	C9H15N3O4	228.101	0.683767	--	--	--	--	--	--	HMDB0029012	--	Organic compounds	Organic acids and derivatives	Carboxylic acids and derivatives	Amino acids, peptides, and analogues	76.0566	21.2881	4.65512	69.1792	24.0274	45.2002	124.177	79.2055	135.483	41.2244	28.0915	25.4782	165.75	23.7321	583.803	70.9432	139.836	48.0675	110.631	47.0676
neg_1381	N2-Succinyl-L-ornithine	47.2	49.8	10.0921	C9H16N2O5	231.101	0.683767	C03415	Arginine and proline metabolism(ko00330);;Metabolic pathways(ko01100)	--	--	--	--	HMDB0001199	899816-95-6	Organic compounds	Organic acids and derivatives	Carboxylic acids and derivatives	Amino acids, peptides, and analogues	1232.04	885.621	1112.62	1760.07	699.669	1163.64	1831.21	1622.65	363.856	723.702	467.639	621.696	1100.46	594.994	735.405	1593.18	710.221	1240.43	1605.78	1071.57
neg_1382	Isoleucyl-Asparagine	48.9	57	8.31169	C10H19N3O4	244.132	0.676617	--	--	--	--	--	--	HMDB0028902	--	Organic compounds	Organic acids and derivatives	Carboxylic acids and derivatives	Amino acids, peptides, and analogues	61.1863	274.542	227.552	656.734	138.468	360.294	941.565	819.71	296.877	320.841	6.17548	48.4366	130.211	73.5774	719.579	971.172	377.266	559.714	993.21	550.788
neg_1385	Isoleucyl-Aspartate	47.4	59.9	-4.82087	C10H18N2O5	281.09	0.676617	--	--	--	--	--	--	HMDB0028903	--	Organic compounds	Organic acids and derivatives	Carboxylic acids and derivatives	Amino acids, peptides, and analogues	1987.25	620.319	967.53	675.219	1133.78	492.127	574.61	605.863	1586.01	1136.57	1613.5	1231.99	2376.66	938.666	971.097	580.459	2246.63	798.474	672.408	664.923
neg_1387	Tubercidin	46.9	49.3	1.35454	C11H14N4O4	311.1	0.676617	--	--	--	--	--	--	HMDB0259318	--	Organic compounds	Nucleosides, nucleotides, and analogues	Pyrrolopyrimidine nucleosides and nucleotides	--	527.181	218.922	236.853	245.319	247.904	128.979	235.677	171.215	375.851	283.587	669.593	572.936	541.493	281.537	159.445	191.584	485.473	240.721	180.062	206.602
neg_1389	2-O-β-D-Glucopyranosyl-L-ascorbic acid	48.9	59.6	2.56043	C12H18O11	337.079	0.676617	--	--	--	--	--	--	--	--	--	--	--	--	3691.01	3000.47	3216.94	2919.32	3228.73	3858.79	4600.45	4889.85	3830.82	3241	2411.22	3124.6	2677.39	2145.54	2446.85	4631.45	3720.22	3791.91	3642.46	5291.51
neg_1390	Britannin	46	46.4	-10.3406	C19H26O7	365.157	0.676617	--	--	--	--	--	--	--	--	--	--	--	--	87.3658	478.182	186.024	749.597	188.985	329.271	715.612	654.899	89.1427	102.348	52.5764	133.818	258.551	124.049	573.117	610.073	165.176	256.245	595.332	119.859
neg_1391	Isofraxidin-7-O-glucoside	43.5	53.8	-34.9315	C17H20O10	419.062	0.683767	--	--	--	--	--	--	--	--	--	--	--	--	135.415	197.16	175.943	367.528	558.097	44.5443	38.0966	50.5563	175.903	57.7346	668.611	171.988	359.74	210.013	153.039	72.0699	220.102	94.1215	33.4994	117.756
neg_1394	Spinosin	48.2	66	18.9773	C28H32O15	643.169	0.676617	C17834	--	LMPK12110988	Polyketides [PK]	Flavonoids [PK12]	Flavones and Flavonols [PK1211]	HMDB0258422	--	Organic compounds	Phenylpropanoids and polyketides	Flavonoids	Flavonoid glycosides	4550.77	15153.2	24807.2	14781.8	23121.3	9791	8162.94	11541.3	5040.6	4565.5	4574.24	11368.7	11731.4	13172.8	10718.8	3826.74	4727.07	2630.06	4552.35	1858.7
neg_1399	Protoviolaceinic acid	46.6	79.9	-4.37284	C21H15N3O3	759.218	0.676617	C21134	Metabolic pathways(ko01100);;Biosynthesis of secondary metabolites(ko01110)	--	--	--	--	--	--	--	--	--	--	135.026	85.4424	116.01	92.2884	134.546	145.438	118.073	142.64	106.225	103.982	119.698	125.101	43.0559	104.651	223.691	61.7486	70.4279	77.9697	63.6438	6.06856
neg_1403	D-Alanine	45.5	47.6	15.8578	C3H7NO2	88.0418	0.676617	C00133	D-Amino acid metabolism(ko00470);;Metabolic pathways(ko01100)	--	--	--	--	HMDB0001310	338-69-2	Organic compounds	Organic acids and derivatives	Carboxylic acids and derivatives	Amino acids, peptides, and analogues	4.2573	7.64397	9.9478	7.26032	9.36989	1.13831	1.89287	1.23e-12	3.29436	5.16648	146.914	80.1499	10.2479	13.6884	1.23e-12	1.23e-12	14.8896	2.42984	4.56695	4.93404
neg_1405	Fumaric acid	52.6	77.4	13.4484	C4H4O4	115.005	0.69735	C00122	Citrate cycle (TCA cycle)(ko00020);;Oxidative phosphorylation(ko00190);;Arginine biosynthesis(ko00220);;Alanine, aspartate and glutamate metabolism(ko00250);;Tyrosine metabolism(ko00350);;Phenylalanine metabolism(ko00360);;Pyruvate metabolism(ko00620);;Butanoate metabolism(ko00650);;Nicotinate and nicotinamide metabolism(ko00760);;Metabolic pathways(ko01100);;Biosynthesis of secondary metabolites…	--	--	--	--	HMDB0000134	110-17-8	Organic compounds	Organic acids and derivatives	Carboxylic acids and derivatives	Dicarboxylic acids and derivatives	3509.72	3767.54	3003.35	2544.03	2591.93	2808.35	2535.41	2921.58	3212.51	5020.75	2436.85	2925.38	2299.01	2518.31	2078.51	4697.87	4012.24	4263.67	4895.54	6309.95
neg_1406	L-Malic acid	53.4	79.1	13.625	C4H6O5	133.016	0.69735	C00149	Citrate cycle (TCA cycle)(ko00020);;Pyruvate metabolism(ko00620);;Glyoxylate and dicarboxylate metabolism(ko00630);;Carbon fixation in photosynthetic organisms(ko00710);;Metabolic pathways(ko01100);;Biosynthesis of secondary metabolites(ko01110);;Carbon metabolism(ko01200)	--	--	--	--	HMDB0000156	97-67-6	Organic compounds	Organic acids and derivatives	Hydroxy acids and derivatives	Beta hydroxy acids and derivatives	13161.2	13197.7	11169.8	8954.92	9583.07	10338.6	9031.65	11079	12058.2	18328.4	9074.6	10383.1	8228.76	8782.22	7658.78	16630.7	15117	15532.2	17021.7	21285.9
neg_1409	Ipsdienone	43.4	23.5	3.08368	C10H14O	171.08	0.69735	C20944	Monoterpenoid biosynthesis(ko00902);;Biosynthesis of secondary metabolites(ko01110)	--	--	--	--	--	--	--	--	--	--	166.073	17.3205	36.5659	64.8203	109.772	16.4456	37.6862	20.92	26.887	7.72149	56.1988	85.3129	371.842	13.0788	65.6863	20.5003	84.8709	23.9696	5.9531	1.23e-12
neg_1410	Aminoacrylate	46.2	39.9	-4.13807	C3H5NO2	173.056	0.69735	C20253	Pyrimidine metabolism(ko00240);;Metabolic pathways(ko01100)	--	--	--	--	--	--	--	--	--	--	144.936	68.8753	59.9766	25.546	60.2343	64.1823	1.23e-12	35.156	60.4925	14.9625	241.165	135.021	158.79	112.758	53.8762	5.30239	189.213	15.1351	1.23e-12	1.23e-12
neg_1412	Isoleucyl-Serine	48.2	50.3	7.1505	C9H18N2O4	217.121	0.704517	--	--	--	--	--	--	HMDB0028916	--	Organic compounds	Organic acids and derivatives	Carboxylic acids and derivatives	Amino acids, peptides, and analogues	29.7426	146.557	236.225	435.936	181.834	101.278	296.791	242.634	72.4525	99.9428	10.0599	80.0614	162.172	89.0902	479.241	171.065	95.7345	126.93	152.927	113.983
neg_1414	L-N2-(2-Carboxyethyl)arginine	46.3	43.8	6.46232	C9H18N4O4	267.109	0.704517	C06655	Metabolic pathways(ko01100);;Biosynthesis of secondary metabolites(ko01110)	--	--	--	--	--	--	--	--	--	--	498.747	145.885	297.295	229.613	202.776	85.4729	131.478	147.227	143.064	134.68	176.563	265.424	328.005	182.414	270.075	90.7321	136.498	64.346	52.4194	43.3162
neg_1417	S-Methyl-5-thio-D-ribose 1-phosphate	42.3	36.7	-19.2448	C6H13O7PS	305.005	0.69735	C04188	Cysteine and methionine metabolism(ko00270);;Metabolic pathways(ko01100)	--	--	--	--	HMDB0000963	68134-74-7	Organic compounds	Organic oxygen compounds	Organooxygen compounds	Carbohydrates and carbohydrate conjugates	828.868	499.954	371.766	246.684	287.136	569.19	282.578	406.871	805.305	1329.71	728.543	472.45	498.875	765.37	156.669	844.26	973.233	1219.44	1058.93	1713.15
neg_1422	2-Methylquinolin-4-ol	45.4	47.5	17.3944	C10H9NO	363.141	0.704517	C21873	Metabolic pathways(ko01100);;Biosynthesis of secondary metabolites(ko01110)	--	--	--	--	--	--	--	--	--	--	12.8095	18.0376	5.15744	61.6066	11.9874	38.884	134.818	79.0336	5.67806	0.137967	25.582	9.50325	104.76	7.80865	288.136	55.9391	41.4017	20.3943	65.7471	2.53514
neg_1428	OA-6129 A	47.7	68	5.46269	C20H31N3O7S	478.165	0.704517	C20813	Carbapenem biosynthesis(ko00332);;Biosynthesis of secondary metabolites(ko01110)	--	--	--	--	--	--	--	--	--	--	435.006	762.464	619.881	678.012	598.681	279.474	339.449	316.839	234.91	173.985	896.457	1173.45	745.385	792.524	767.206	234.971	216.004	162.137	276.828	124.449
neg_143	alpha-D-Ribose 1-methylphosphonate 5-triphosphate	45.5	60.5	-24.1889	C6H16O16P4	488.902	0.519317	C20422	Phosphonate and phosphinate metabolism(ko00440);;Metabolic pathways(ko01100)	--	--	--	--	--	--	--	--	--	--	17.8509	13.9864	13.3172	13.4721	30.1457	9.27009	10.414	14.5204	22.0593	23.7178	1.23e-12	1.23e-12	9.32354	2.13117	26.836	3.91207	12.3847	7.58618	20.372	19.5585
neg_1435	Glyoxylate	43.6	43.2	23.3589	C2H2O3	72.9948	0.704517	C00048	Purine metabolism(ko00230);;Caffeine metabolism(ko00232);;Glycine, serine and threonine metabolism(ko00260);;Arginine and proline metabolism(ko00330);;Glyoxylate and dicarboxylate metabolism(ko00630);;C5-Branched dibasic acid metabolism(ko00660);;Metabolic pathways(ko01100);;Biosynthesis of secondary metabolites(ko01110);;Carbon metabolism(ko01200)	--	--	--	--	HMDB0000119	298-12-4	Organic compounds	Organic acids and derivatives	Carboxylic acids and derivatives	Carboxylic acids	20.3217	22.2894	19.0068	14.7337	14.9679	16.1406	15.4651	15.3141	18.4603	28.1885	11.2341	19.7884	13.3135	13.3307	12.3092	26.3474	21.405	24.0304	26.4404	34.9698
neg_1437	3,6'-Disinapoyl sucrose	44.9	46.8	14.1988	C34H42O19	799.241	0.69735	--	--	--	--	--	--	HMDB0040838	139891-98-8	Organic compounds	Phenylpropanoids and polyketides	Cinnamic acids and derivatives	Hydroxycinnamic acids and derivatives	1047.7	620.493	1063.7	679.491	752.255	445.083	368.628	666.752	1054.17	458.713	692.114	640.075	693.533	502.939	980.951	264.112	566.196	219.047	243.912	135.482
neg_1439	(S)-Lactate	48.3	63.2	17.4016	C3H6O3	89.026	0.704517	C00186	Glycolysis / Gluconeogenesis(ko00010);;Fructose and mannose metabolism(ko00051);;Pyruvate metabolism(ko00620);;Propanoate metabolism(ko00640);;Metabolic pathways(ko01100);;Biosynthesis of secondary metabolites(ko01110)	--	--	--	--	HMDB0000190	79-33-4	Organic compounds	Organic acids and derivatives	Hydroxy acids and derivatives	Alpha hydroxy acids and derivatives	63.1074	81.7351	71.9454	56.3018	61.1678	53.1928	49.657	53.531	68.301	103.194	52.5495	64.0438	62.3575	48.3559	60.3363	79.8777	72.4164	81.4106	95.8859	126.37
neg_1444	L-Asparagine	50.3	54.5	-1.29153	C4H8N2O3	167.023	0.71165	C00152	Alanine, aspartate and glutamate metabolism(ko00250);;Cyanoamino acid metabolism(ko00460);;Aminoacyl-tRNA biosynthesis(ko00970);;Metabolic pathways(ko01100);;Biosynthesis of secondary metabolites(ko01110);;Biosynthesis of amino acids(ko01230)	--	--	--	--	HMDB0000168	70-47-3	Organic compounds	Organic acids and derivatives	Carboxylic acids and derivatives	Amino acids, peptides, and analogues	2631.57	481.466	2062.86	310.477	492.555	132.348	92.6563	79.1055	1824.78	290.932	13742.4	2022.25	611.698	5920.69	622.981	47.7834	8074.39	86.575	62.0918	932.384
neg_1452	Streptomycin	48	72.2	-22.8134	C21H39N7O12	602.227	0.71165	C00413	Metabolic pathways(ko01100);;Biosynthesis of secondary metabolites(ko01110)	--	--	--	--	HMDB0015214	57-92-1	Organic compounds	Benzenoids	Benzene and substituted derivatives	Diphenylacetonitriles	400.361	1964.06	3443.65	1866.47	1907.75	789.268	813.557	836.588	275.323	255.921	568.29	1614.21	1045.88	1153.52	2506.7	341.318	215.393	160.462	276.82	71.7104
neg_1455	Monotropein	43.4	55.9	-22.5292	C16H22O11	779.208	0.71165	C09788	--	LMPR0102070012	Prenol Lipids [PR]	Isoprenoids [PR01]	C10 isoprenoids (monoterpenes) [PR0102]	HMDB0035608	5945-50-6	Organic compounds	Lipids and lipid-like molecules	Prenol lipids	Terpene glycosides	502.557	374.917	462.601	238.467	290.628	215.905	302.243	233.373	941.304	700.769	581.279	322.79	460.758	377.599	404.71	513.763	540.913	538.03	586.02	606.694
neg_1456	Daidzein-4'-O-glucoside	43.1	54.3	-38.3914	C21H20O9	877.188	0.71165	--	--	--	--	--	--	--	--	--	--	--	--	93.081	74.2518	82.3386	54.0701	38.2018	77.5474	83.8976	68.5127	204.677	121.305	111.328	103.474	28.487	81.1218	82.2446	104.773	68.1626	184.797	136.66	73.5826
neg_1460	Acetyl-DL-Valine	42.8	33.7	10.3864	C7H13NO3	158.084	0.7188	--	--	--	--	--	--	--	--	--	--	--	--	12.1752	75.2263	37.611	55.4115	42.1094	6.69817	15.8969	8.35867	2.75716	3.22982	16.5335	43.9192	45.0316	32.688	52.3048	1.23e-12	4.86888	1.48799	2.34794	1.23e-12
neg_1461	1-Aminocyclohexanecarboxylic acid	46.4	46.5	12.2595	C7H13NO2	188.095	0.7188	--	--	--	--	--	--	HMDB0243822	--	Organic compounds	Organic acids and derivatives	Carboxylic acids and derivatives	Amino acids, peptides, and analogues	458.53	1330.97	923.153	1105.69	1394.94	279.872	426.975	359.539	160.969	125.073	595.476	1110.87	1648.46	787.375	1335.14	112.805	328.49	72.0782	140.099	52.9031
neg_1463	Deoxyarbutin	46.5	43.7	-0.189624	C11H14O3	215.069	0.7188	--	--	--	--	--	--	--	--	--	--	--	--	786.968	222.459	212.337	282.578	303.117	228.207	272.988	299.255	455.73	252.45	489.969	342.87	551.763	245.284	255.448	140.75	429.332	139.217	133.881	90.0652
neg_1467	Norscopolamine	40.3	29.8	-7.46236	C16H19NO4	288.122	0.7188	--	--	--	--	--	--	HMDB0255751	--	Organic compounds	Organic acids and derivatives	Hydroxy acids and derivatives	Beta hydroxy acids and derivatives	525.613	384.895	442.992	480.065	276.94	347.603	508.52	537.346	325.198	504.879	393.792	336.862	469.903	390.24	844.793	613.127	540.162	514.161	601.391	440.596
neg_1469	3-O-Acetylhamayne	43.1	38.1	10.4475	C18H19NO5	350.104	0.7188	C12165	--	--	--	--	--	--	--	--	--	--	--	1175.28	536.967	360.439	475.48	412.174	1025.92	780.94	803.983	1951.65	2611.22	1731.92	1354.16	1012.95	1443.85	451.738	410.54	1587.41	978.142	833.237	693.196
neg_1470	Coniferyl ferulate	45.4	45.7	14.0947	C20H20O6	355.124	0.7188	C17855	--	--	--	--	--	HMDB0250437	--	Organic compounds	Phenylpropanoids and polyketides	Cinnamic acids and derivatives	Hydroxycinnamic acids and derivatives	136.573	164.941	609.027	229.558	285.102	95.2032	147.155	191.856	156.89	121.726	198.142	261.641	287.008	194.312	494.86	64.3453	130.884	38.3853	47.9221	102.718
neg_1471	6-Hydroxyprotopine	40.5	52.5	18.1029	C20H19NO6	368.121	0.7188	C05190	Isoquinoline alkaloid biosynthesis(ko00950);;Metabolic pathways(ko01100);;Biosynthesis of secondary metabolites(ko01110)	--	--	--	--	--	--	--	--	--	--	105.173	274.118	171.578	162.31	117.282	47.8751	62.5772	64.4049	22.6843	46.9583	113.156	144.534	158.95	150.705	93.558	49.2656	49.4005	65.1974	24.0508	47.7273
neg_1472	3,5-Bis(3-methoxy-4-hydroxyphenyl)-2,3-dihydro-2(1H)-pyridinone	43.4	55.8	19.0142	C19H19NO5	376.102	0.7188	--	--	--	--	--	--	--	--	--	--	--	--	475.197	1175.88	621.742	1105.64	908.933	323.962	483.963	373.45	248.432	192.267	711.605	1146.61	1402.5	775.329	743.063	242.378	524.072	174.858	310.585	124.868
neg_1480	N-Acetylmuramic acid 6-phosphate	44	47.9	3.44101	C11H20NO11P	745.15	0.7188	C16698	Amino sugar and nucleotide sugar metabolism(ko00520);;Metabolic pathways(ko01100);;Biosynthesis of nucleotide sugars(ko01250)	--	--	--	--	--	--	--	--	--	--	135.923	161.754	168.975	168.809	123.792	147.251	137.654	131.267	710.201	227.374	182.177	181.493	103.992	130.57	218.079	116.007	107.629	171.265	123.672	161.613
neg_1482	Tripterygiumine K	41	42.1	27.4092	C39H45NO16	782.288	0.7188	--	--	--	--	--	--	--	--	--	--	--	--	241.546	2014.16	4163.14	2618.43	1945.26	904.494	1076	1215.45	114.057	167.45	289.471	1747.23	952.419	651.007	2277.2	313.328	79.6786	97.1209	208.793	36.5495
neg_1483	Acetoacetate	40.6	22.1	16.0657	C4H6O3	101.026	0.7331	C00164	Valine, leucine and isoleucine degradation(ko00280);;Lysine degradation(ko00310);;Tyrosine metabolism(ko00350);;Butanoate metabolism(ko00650);;Metabolic pathways(ko01100)	--	--	--	--	HMDB0304256	--	Organic compounds	Organic acids and derivatives	Keto acids and derivatives	Short-chain keto acids and derivatives	66.9378	62.5119	56.5638	68.2316	79.4022	365.601	75.786	179.781	142.525	146.157	49.2948	52.8063	82.2952	170.342	97.0264	88.3651	66.5528	60.0517	412.209	83.8391
neg_1488	4-Hydroxy-3-methoxy-benzaldehyde	40.5	24.5	12.1394	C8H8O3	151.042	0.7331	C00755	Biosynthesis of various alkaloids(ko00996);;Metabolic pathways(ko01100);;Biosynthesis of secondary metabolites(ko01110)	--	--	--	--	HMDB0012308	121-33-5	Organic compounds	Benzenoids	Phenols	Methoxyphenols	15.493	13.5362	42.4342	11.7276	37.936	10.0956	2.61575	4.8974	1.23e-12	7.23195	33.1905	23.414	26.1271	15.0805	43.3355	2.05718	4.44102	5.41942	2.39929	8.28713
neg_1489	4-Methylene-L-glutamate	40.2	26	10.0547	C6H9NO4	158.047	0.72595	C00651	C5-Branched dibasic acid metabolism(ko00660)	--	--	--	--	HMDB0029433	16804-57-2	Organic compounds	Organic acids and derivatives	Carboxylic acids and derivatives	Amino acids, peptides, and analogues	2240.4	637.285	966.845	755.133	908.822	605.195	714.642	824.23	1268.15	1164.02	2856.27	1451.21	2238.79	1296.61	1226.24	747.468	2781.69	832.257	639.709	815.38
neg_1490	Dopamine	40.7	27.8	21.8041	C8H11NO2	198.081	0.7331	C03758	Tyrosine metabolism(ko00350);;Isoquinoline alkaloid biosynthesis(ko00950);;Betalain biosynthesis(ko00965);;Metabolic pathways(ko01100);;Biosynthesis of secondary metabolites(ko01110)	--	--	--	--	HMDB0000073	62-31-7	Organic compounds	Benzenoids	Phenols	Benzenediols	51.7676	16.1734	19.1587	25.7452	28.3062	13.5329	24.4661	29.0358	30.8551	37.1877	72.9196	74.2867	54.1596	29.7933	17.5626	16.0211	66.8596	23.8524	12.77	20.4626
neg_1493	Carnosine	46.6	46.3	-5.67978	C9H14N4O3	261.075	0.7331	C00386	Histidine metabolism(ko00340);;beta-Alanine metabolism(ko00410);;Metabolic pathways(ko01100)	--	--	--	--	HMDB0000033	305-84-0	Organic compounds	Organic acids and derivatives	Peptidomimetics	Hybrid peptides	935.224	641.999	547.551	486.935	470.413	552.326	330.679	369.033	863.856	921.584	2018.94	1571.63	637.078	2095.28	572.056	236.498	761.025	373.434	243.1	689.836
neg_1497	2',3'-Cyclic GMP	43.5	22.1	1.06148	C10H12N5O7P	344.041	0.7331	C06194	Purine metabolism(ko00230);;Metabolic pathways(ko01100)	--	--	--	--	HMDB0011629	15718-49-7	Organic compounds	Lipids and lipid-like molecules	Sphingolipids	Glycosphingolipids	813.227	714.682	678.131	319.479	387.796	1058.12	559.983	876.75	674.628	1304.59	1577.95	994.387	943.592	1337.66	233.847	792.637	726.424	1070.38	960.541	1444.03
neg_1498	6-Methylpretetramide	43.2	30.6	-2.68924	C20H15NO6	364.082	0.7331	C06629	Metabolic pathways(ko01100);;Biosynthesis of secondary metabolites(ko01110)	--	--	--	--	--	--	--	--	--	--	874.252	276.425	307.131	313.822	360.999	504.901	472.697	452.032	726.264	731.361	974.509	604.919	752.712	573.539	505.01	321.978	795.303	516.224	488.195	480.515
neg_1502	trans-Zeatin-7-beta-D-glucoside	46.7	63.1	-9.95325	C16H23N5O6	426.159	0.72595	C16443	Zeatin biosynthesis(ko00908);;Biosynthesis of secondary metabolites(ko01110)	--	--	--	--	--	--	--	--	--	--	183.145	200.468	290.072	171.296	304.303	25.9892	39.7894	81.3465	54.7966	0.7918	238.089	337.074	474.866	304.273	215.147	5.61808	118.209	11.7233	0.76941	3.49834
neg_1503	Prunitrin	47.3	60.2	15.0986	C22H22O10	445.121	0.7331	--	--	--	--	--	--	HMDB0034149	154-36-9	Organic compounds	Phenylpropanoids and polyketides	Isoflavonoids	Isoflavonoid O-glycosides	399.065	734.57	898.579	710.923	573.99	611.787	629.512	799.484	466.826	560.786	670.483	848.281	630.978	679.399	483.83	278.427	359.987	267.932	257.959	159.005
neg_1507	Tobramycin	45.8	65.2	25.9171	C18H37N5O9	502.241	0.7331	C00397	Neomycin, kanamycin and gentamicin biosynthesis(ko00524);;Biosynthesis of secondary metabolites(ko01110)	--	--	--	--	HMDB0014822	32986-56-4	Organic compounds	Organic oxygen compounds	Organooxygen compounds	Carbohydrates and carbohydrate conjugates	1.7911	7.38036	3.23194	18.7861	0.557506	19.3213	45.6869	31.3243	1.23e-12	12.6977	0.760307	1.22781	0.980433	0.230109	32.7935	91.0372	1.29885	52.278	63.9269	36.1091
neg_1510	Oleracein C	43.7	69.3	-26.3435	C30H35NO16	686.153	0.7331	--	--	--	--	--	--	--	--	--	--	--	--	241.849	544.917	671.309	389.081	378.962	910.624	589.096	842.14	327.239	461.169	460.979	804.595	372.129	571.2	291.553	464.624	168.196	411.265	402.248	179.704
neg_1514	Isoguanine	42.3	39.4	21.4648	C5H5N5O	172.027	0.740267	--	--	--	--	--	--	HMDB0000403	3373-53-3	Organic compounds	Organoheterocyclic compounds	Imidazopyrimidines	Purines and purine derivatives	0.893533	3.93807	3.10764	1.91702	1.67765	109.083	8.83226	44.0322	1.23e-12	8.61674	0.545708	5.1154	2.10085	31.2082	0.313764	1.58894	0.0573874	1.3345	117.241	1.23e-12
neg_1517	2,4-Bis(acetamido)-2,4,6-trideoxy-beta-L-altropyranose	48	51	7.66461	C10H18N2O5	245.116	0.740267	C19972	Amino sugar and nucleotide sugar metabolism(ko00520);;Metabolic pathways(ko01100);;Biosynthesis of nucleotide sugars(ko01250)	--	--	--	--	--	--	--	--	--	--	661.284	878.727	965.936	2076.2	585.58	628.32	1601.41	1396.25	223.759	536.188	429.395	546.933	1005.8	301.068	1043.68	1713.49	581.868	1438.53	1248.7	1159.76
neg_1518	Dihydrozeatin	42.5	23.1	-5.78034	C10H15N5O	256.096	0.740267	C02029	Zeatin biosynthesis(ko00908);;Biosynthesis of secondary metabolites(ko01110);;Plant hormone signal transduction(ko04075)	--	--	--	--	HMDB0012215	37789-32-5	Organic compounds	Organoheterocyclic compounds	Imidazopyrimidines	Purines and purine derivatives	97.9035	300.149	449.069	595.836	339.385	168.516	424.471	420.54	159.167	79.3239	128.649	234.976	684.139	159.74	954.817	390.937	375.977	92.6022	321.311	113.445
neg_1525	S-(5'-Adenosy)-L-homocysteine	47.7	51.2	4.33745	C14H20N6O5S	429.126	0.740267	--	--	--	--	--	--	--	--	--	--	--	--	3493.03	4994	5672.31	5225.66	4562.06	3075.76	3111.78	3425.96	3123.07	3567.08	4538.28	5137.73	5371.64	4814.82	5943.52	1836.11	3047.4	3098.78	1688.78	1885.25
neg_1527	12-Deoxyaklanonic acid	43	37.1	17.1209	C21H18O7	427.11	0.740267	C12420	Metabolic pathways(ko01100);;Biosynthesis of secondary metabolites(ko01110)	--	--	--	--	--	--	--	--	--	--	358.396	893.276	972.064	737.682	395.078	620.279	364.703	475.994	335.587	773.095	826.101	852.449	867.023	979.164	440.046	270.999	471.42	856.335	236.391	394.682
neg_1528	Myricetin-3-O-galactoside	41.6	41.3	19.5161	C21H20O13	525.098	0.740267	--	--	--	--	--	--	--	--	--	--	--	--	980.318	843.567	847.503	678.998	609.291	1835.74	938.36	1473.85	745.517	1103.78	1104.46	843.027	818.131	1121.84	528.981	669.588	815.105	1172.27	1463.78	651.463
neg_1532	Myristoyl-coenzyme A	50.5	64.2	0.731245	C35H59N7O17P3S-3	1019.29	0.75455	--	--	--	--	--	--	HMDB0001521	3130-72-1	Organic compounds	Lipids and lipid-like molecules	Fatty Acyls	Fatty acyl thioesters	211.541	343.578	467.363	283.523	383.195	198.754	158.102	257.925	193.706	133.741	241.87	206.094	240.264	269.199	239.542	182.937	143.73	164.251	147.757	107.41
neg_1541	CDP	42.3	25.9	-1.64188	C9H15N3O11P2	402.01	0.7474	C00112	Pyrimidine metabolism(ko00240);;Metabolic pathways(ko01100);;Nucleotide metabolism(ko01232);;Biosynthesis of cofactors(ko01240)	--	--	--	--	HMDB0001546	63-38-7	Organic compounds	Nucleosides, nucleotides, and analogues	Pyrimidine nucleotides	Pyrimidine ribonucleotides	1.23e-12	1.23e-12	1.23e-12	0.0318436	1.23e-12	32.7795	1.97231	11.9961	1.50824	2.06698	1.23e-12	1.84548	1.23e-12	9.92381	1.23e-12	0.868838	1.23e-12	1.23e-12	49.9619	1.23e-12
neg_1543	Salbostatin 6'-phosphate	44.3	50	8.95577	C13H24NO11P	422.087	0.75455	C21211	Biosynthesis of secondary metabolites(ko01110)	--	--	--	--	--	--	--	--	--	--	1011.7	442.691	516.432	383.93	443.355	441.842	404.245	350.465	882.217	1193.19	1562.46	904.187	763.251	703.925	342.917	343.992	1265.87	557.792	629.55	623.77
neg_1551	Feruloylmalic acid	40.5	37.1	11.985	C14H14O8	619.138	0.75455	--	--	--	--	--	--	--	--	--	--	--	--	12.9026	91.5501	93.8962	101.517	29.8922	74.5114	48.6224	52.6561	56.662	169.119	41.536	73.3737	63.91	118.243	63.3416	29.9041	36.0495	119.662	20.9016	64.7534
neg_1552	Quercetin-3-O-sambubioside	45.3	44.1	2.70497	C26H28O16	641.138	0.7474	--	--	--	--	--	--	--	--	--	--	--	--	97.8938	87.6444	105.355	46.8825	119.324	61.6253	21.9377	82.4732	102.968	94.582	408.684	114.461	283.813	115.579	29.7685	29.9924	171.304	115.863	46.4985	47.5798
neg_1557	Pyromeconic acid	48.8	62.2	16.0921	C5H4O3	111.011	0.7617	--	--	--	--	--	--	--	--	--	--	--	--	33589	19958	18873.1	17642.1	19169.1	18906.2	20949.6	14871.4	25136.5	32825.2	14646.7	13250.9	12358.9	20932.7	8569.12	23954.5	20975.7	24331.7	18851.5	33452.8
neg_1562	Aconitic acid	47	46	8.86829	C6H6O6	173.011	0.7617	--	--	--	--	--	--	HMDB0247961	--	Organic compounds	Organic acids and derivatives	Carboxylic acids and derivatives	Tricarboxylic acids and derivatives	11563.6	6213.53	5648.77	5236.14	5488.2	7112.57	6848.42	5254.54	8891.91	11133.2	4652.52	4655.07	3977.54	6707.43	2969.62	7516.69	8385.83	8769.98	6941.68	11973
neg_1564	Citric acid	48.7	54.6	8.83849	C6H8O7	191.021	0.7617	C00158	Citrate cycle (TCA cycle)(ko00020);;Alanine, aspartate and glutamate metabolism(ko00250);;Glyoxylate and dicarboxylate metabolism(ko00630);;Metabolic pathways(ko01100);;Biosynthesis of secondary metabolites(ko01110);;Carbon metabolism(ko01200);;2-Oxocarboxylic acid metabolism(ko01210);;Biosynthesis of amino acids(ko01230);;Biosynthesis of cofactors(ko01240)	--	--	--	--	HMDB0000094	77-92-9	Organic compounds	Organic acids and derivatives	Carboxylic acids and derivatives	Tricarboxylic acids and derivatives	173979	100068	96098.5	89250.7	105546	88573.2	97922.3	76579.9	132350	158096	73867.1	66634	65604.2	101243	50918.2	107910	118827	117611	93634.4	154582
neg_1583	Gomphrenin I (betanidin 6-O-β-glucoside)	43.2	40.6	10.4529	C24H26N2O13	571.124	0.7617	--	--	--	--	--	--	--	--	--	--	--	--	71.0839	131.74	150.757	150.218	91.8656	142.787	142.178	137.875	57.95	69.9119	242.319	250.239	185.499	121.431	135.654	140.471	119.323	135.64	131.033	31.9323
neg_1584	UDP-6-sulfoquinovose	48.5	77.9	-29.5828	C15H24N2O19P2S	628.991	0.7617	C11521	Amino sugar and nucleotide sugar metabolism(ko00520);;Glycerolipid metabolism(ko00561);;Metabolic pathways(ko01100);;Biosynthesis of nucleotide sugars(ko01250)	--	--	--	--	--	--	--	--	--	--	1274.33	311.73	248.149	123.603	448.295	141.866	134.82	99.7847	771.395	647.056	218.593	149.531	170.633	423.158	10.4752	200.035	625.21	405.285	214.909	865.068
neg_1599	Rocagloic acid	48	72.3	4.58631	C27H26O8	1015.34	0.78315	--	--	--	--	--	--	--	--	--	--	--	--	129.141	41.2	67.7021	62.7908	61.1506	53.8929	69.2511	95.4578	98.9349	72.3657	96.4254	99.6446	103.534	70.1078	73.1764	74.8987	88.9535	57.2277	60.3485	21.1776
neg_1601	Kedarcidin chromophore	46.2	82.5	34.226	C53H60ClN3O16	1050.38	0.78315	C21301	Metabolic pathways(ko01100);;Biosynthesis of secondary metabolites(ko01110)	--	--	--	--	--	--	--	--	--	--	390.686	740.25	1043.25	667.205	750.856	312.366	316.218	409.502	389.214	216.564	734.191	1344.7	852.759	529.8	441.28	199.623	422.278	194.646	219.844	121.897
neg_1615	4-hydroxystyrene	41.7	26.8	12.6787	C8H8O	119.052	0.78315	C05627	Phenylpropanoid biosynthesis(ko00940);;Biosynthesis of secondary metabolites(ko01110)	--	--	--	--	HMDB0004072	2628-17-3	Organic compounds	Benzenoids	Benzene and substituted derivatives	Styrenes	40.5812	171.378	198.805	180.596	179.619	41.8508	56.6704	79.5117	24.4821	21.452	48.9001	186.14	124.01	84.1265	195.334	43.7508	59.8758	23.5689	48.3534	28.1943
neg_1621	Calystegine A3	42.7	39.9	26.2541	C7H13NO3	180.068	0.78315	C10850	Tropane, piperidine and pyridine alkaloid biosynthesis(ko00960)	--	--	--	--	--	--	--	--	--	--	5073.8	16090.4	19276.3	17706.7	20937	4330.03	5809.79	7381.08	3447.01	2799.3	4476.2	16488.8	13681.4	7981.8	18653.5	4285.08	5687.18	2356.16	4147.4	3060.69
neg_1622	(E)-3-(3,4-dihydroxyphenyl)acrylaldehyde	41.5	29.9	12.7728	C9H8O3	163.042	0.78315	--	--	--	--	--	--	--	--	--	--	--	--	208.896	554.939	636.883	641.607	660.894	144.694	195.055	246.308	130.792	100.404	167.741	556.449	477.285	281.942	625.788	144.488	196.565	64.8266	137.723	106.37
neg_1624	Pyridoxine	42.5	33.9	11.3643	C8H11NO3	168.069	0.78315	C00314	Vitamin B6 metabolism(ko00750);;Metabolic pathways(ko01100);;Biosynthesis of cofactors(ko01240)	--	--	--	--	HMDB0000239	65-23-6	Organic compounds	Organoheterocyclic compounds	Pyridines and derivatives	Pyridoxines	34.257	17.058	22.4464	14.1472	17.2195	1.0931	7.51321	6.14301	10.7554	3.30784	52.8448	41.7448	66.1737	34.2806	38.6026	11.7167	36.6733	7.32581	7.8052	1.23e-12
neg_1628	Geranyl acetate	46.9	42.4	0.618014	C12H20O2	217.121	0.78315	C09861	--	--	--	--	--	HMDB0035157	105-87-3	Organic compounds	Lipids and lipid-like molecules	Fatty Acyls	Fatty alcohol esters	203.578	705.502	905.504	1357.55	657.018	355.95	831.839	1015.91	235.987	317.172	132.499	449.481	638.491	274.575	1673.69	991.994	391.034	506.931	906.701	504.641
neg_1630	2-Amino-5-epi-valiolone	43.8	53.7	28.6921	C7H13NO5	212.06	0.78315	C21247	Biosynthesis of secondary metabolites(ko01110)	--	--	--	--	--	--	--	--	--	--	93.6219	20.7283	42.136	39.1671	39.8187	13.4479	5.60523	21.0645	9.54679	30.602	118.041	109.041	165.484	57.853	70.9652	9.0367	108.764	9.56388	5.29384	4.0017
neg_1631	N1-Acetyl-tabtoxinine-beta-lactam	42.5	33.8	3.66323	C9H14N2O5	459.167	0.78315	C20921	Monobactam biosynthesis(ko00261);;Biosynthesis of secondary metabolites(ko01110)	--	--	--	--	--	--	--	--	--	--	11174.3	2203.17	6579.59	2741.5	4559.73	2455.07	4633.8	2767.22	2580.32	1672.59	5093.4	4191.46	7238.81	3667.61	9558.03	1740.38	2205.58	1272.48	1409.98	1955.97
neg_1635	Glycyl-tryptophan	44.5	35.1	0.621808	C13H15N3O3	282.086	0.78315	--	--	--	--	--	--	HMDB0028852	--	Organic compounds	Organic acids and derivatives	Carboxylic acids and derivatives	Amino acids, peptides, and analogues	2094.88	1887.82	2800.36	1996.77	2055.03	1002.33	930.355	1372.49	1386.57	1281.75	3189.53	2460.41	2580.99	1638.3	1422.23	897.131	2385.25	991.407	1318.5	961.401
neg_1639	Nopaline	52	75.2	4.33149	C11H20N4O6	349.162	0.78315	C01682	Arginine and proline metabolism(ko00330);;Metabolic pathways(ko01100);;ABC transporters(ko02010)	--	--	--	--	--	--	--	--	--	--	1787.76	1823.74	1857.19	2657.44	1502.68	812.994	1668.84	1742.16	1140.47	787.14	3253.81	3029.24	3231.61	1547.39	3884.51	1275.3	2639.22	970.959	1555.8	882.302
neg_1643	Tyrosyl-Glutamine	45.4	39.7	-5.91229	C14H19N3O5	344.1	0.78315	--	--	--	--	--	--	HMDB0029103	--	Organic compounds	Organic acids and derivatives	Carboxylic acids and derivatives	Amino acids, peptides, and analogues	3249.18	1055.37	1577.03	1894.86	2392.53	1311.15	1344.7	1316.2	1992.79	1138.29	3606.3	2932.33	3849.82	1101.98	1004.3	699.118	2170.35	879.416	859.13	665.016
neg_1645	Isoandrocymbine	45.3	55.1	-12.2562	C21H25NO5	370.161	0.776017	C16708	Isoquinoline alkaloid biosynthesis(ko00950);;Biosynthesis of secondary metabolites(ko01110)	--	--	--	--	--	--	--	--	--	--	250.499	318.021	613.905	359.231	427.424	204.396	341.662	426.289	309.749	135.852	388.39	823.114	647.66	567.761	3067.67	242.804	237.835	103.007	347.837	160.914
neg_1646	DIMBOA glucoside	43.9	54.7	29.102	C15H19NO10	372.104	0.78315	--	--	--	--	--	--	HMDB0301843	--	Organic compounds	Organic oxygen compounds	Organooxygen compounds	Carbohydrates and carbohydrate conjugates	993.647	729.9	1114.95	611.982	807.465	351.609	378.88	606.477	592.595	379.497	2984.96	1505.52	1868.62	868.656	401.6	293.619	656.051	272.599	353.76	265.092
neg_1650	Linustatin	48	85.9	-2.53627	C16H27NO11	817.231	0.776017	C08333	--	--	--	--	--	HMDB0303673	--	Organic compounds	Organic oxygen compounds	Organooxygen compounds	Carbohydrates and carbohydrate conjugates	1647.59	1034.97	1370.71	1031.7	1219.54	738.488	807.493	986.058	1818.57	1430.87	1475.7	1506.01	1438.4	1002.16	1327.35	723.033	1310.61	871.178	799.703	901.617
neg_1652	Glandicoline A	48.2	49.6	-3.66817	C22H21N5O3	424.138	0.78315	C22166	Biosynthesis of secondary metabolites(ko01110)	--	--	--	--	--	--	--	--	--	--	487.008	1821.06	2800.48	1886.94	1960.01	447.007	490.585	902.092	239.503	233.794	630.213	2290.21	1762.1	1204.07	946.968	452.405	405.432	279.545	576.944	240.643
neg_1667	6''-O-Malonylglycitin	45.4	49.4	15.0186	C25H24O13	553.104	0.776017	--	--	--	--	--	--	HMDB0039323	137705-39-6	Organic compounds	Phenylpropanoids and polyketides	Flavonoids	Flavonoid glycosides	91.5266	112.348	134.399	64.8261	186.837	42.5999	14.4041	34.4617	58.4674	129.376	80.7781	94.656	26.2267	210.809	18.4915	3.75901	95.7443	37.2929	10.0697	56.2646
neg_1674	Isoacteoside	50.1	84.8	16.4326	C29H36O15	645.19	0.78315	--	--	--	--	--	--	HMDB0041025	61303-13-7	Organic compounds	Phenylpropanoids and polyketides	Cinnamic acids and derivatives	Hydroxycinnamic acids and derivatives	267.766	346.241	548.477	292.444	459.397	567.172	658.203	977.74	296.041	335.329	301.888	609.259	636.591	265.973	724.151	799.188	415.719	402.2	1016	288.675
neg_1682	Evonine	45.1	65.1	22.9131	C36H43NO17	806.269	0.78315	--	--	--	--	--	--	--	--	--	--	--	--	1528.38	1844.46	2121.66	1789	2509.5	650.081	914.691	1227.71	1314.45	660.981	1945.32	5658.53	3350.79	1282.14	1164.54	658.657	1510.3	554.567	750.231	535.734
neg_1683	4''-O-Carbamoyl ansamitocinoside P-3	48	95.9	28.4868	C38H52ClN3O15	824.325	0.78315	C20140	Biosynthesis of secondary metabolites(ko01110)	--	--	--	--	--	--	--	--	--	--	943.094	892.108	1516.89	1097.34	992.767	555.489	544.396	717.913	800.377	464.971	1235.23	1619.67	1278.5	785.288	1888.42	394.022	775.051	376.853	423.854	345.151
neg_1689	3-Methylcrotonyl-CoA	41	29.6	5.23926	C26H42N7O17P3S	870.136	0.776017	C03069	Valine, leucine and isoleucine degradation(ko00280);;Metabolic pathways(ko01100);;Biosynthesis of secondary metabolites(ko01110)	--	--	--	--	HMDB0001493	6712-03-04	Organic compounds	Lipids and lipid-like molecules	Fatty Acyls	Fatty acyl thioesters	785.659	22.6442	28.0341	7.97837	62.2424	10.3124	1.23e-12	0.0386379	843.139	582.135	324.727	45.3387	61.9745	111.844	0.416411	34.4456	466.2	178.883	63.1056	419.288
neg_1690	Dihydromonotropein methyl ester	43.8	74.7	5.35557	C17H26O11	871.313	0.78315	--	--	--	--	--	--	--	--	--	--	--	--	629.168	328.306	499.535	430.169	350.279	315.597	416.173	474.034	498.051	351.873	779.364	681.081	674.092	359.749	547.649	385.145	559.212	348.124	421.022	296.773
neg_1696	Sec-O-glucosylhamaudol	47	73.2	1.61223	C21H26O10	921.305	0.78315	C17484	--	--	--	--	--	HMDB0258199	--	Organic compounds	Organoheterocyclic compounds	Benzopyrans	1-benzopyrans	2225.58	863.559	894.501	909.675	1064.35	533.341	699.135	787.424	1751.49	761.21	4352.17	3257.1	2246.97	1038.58	897.854	582.15	2513.74	884.176	765.395	514.604
neg_1703	Gymnoside III	45.2	64.7	2.16933	C42H58O23	965.308	0.78315	--	--	--	--	--	--	--	--	--	--	--	--	683.621	344.375	456.114	343.265	404.049	299.055	327.357	413.367	633.5	285.233	815.267	799.23	705.358	356.181	424.023	251.056	664.921	278.696	298.503	233.057
neg_1704	6,4'-Dimethoxyisoflavone-7-O-glucoside (Wistin)	44.8	76.8	-11.0254	C23H24O10	979.278	0.776017	--	--	--	--	--	--	--	--	--	--	--	--	1908.56	612.262	816.369	654.296	741.488	584.662	630.926	685.443	2135.04	1386.65	1141.79	857.718	846.897	642.63	583.687	611.798	1496.12	1015.82	641.979	891.587
neg_1707	1-Aminocyclopropane-1-carboxylate	40.6	27	19.0762	C4H7NO2	100.042	0.7903	C01234	Cysteine and methionine metabolism(ko00270);;Metabolic pathways(ko01100);;Biosynthesis of secondary metabolites(ko01110)	--	--	--	--	HMDB0036458	22059-21-8	Organic compounds	Organic acids and derivatives	Carboxylic acids and derivatives	Amino acids, peptides, and analogues	63.2387	54.3667	36.9086	45.5202	44.9546	12.9335	18.02	14.6587	59.5472	42.9557	121.649	87.9274	98.8607	50.4188	39.4273	17.1488	65.7507	18.2281	22.0769	33.212
neg_1708	Doxorubicin	43.9	68.6	2.44792	C27H29NO11	1085.34	0.7903	C01661	Biosynthesis of secondary metabolites(ko01110)	--	--	--	--	HMDB0015132	23214-92-8	Organic compounds	Organic acids and derivatives	Carboxylic acids and derivatives	Amino acids, peptides, and analogues	317.756	167.783	220.932	220.972	229.842	198.471	175.193	227.87	293.268	194.293	400.396	326.549	325.164	238.419	313.129	132.625	366.714	177.197	180.369	103.104
neg_1714	L-Norleucine	41.7	23	11.9066	C6H13NO2	130.089	0.7903	C01933	--	--	--	--	--	HMDB0001645	327-57-1	Organic compounds	Organic acids and derivatives	Carboxylic acids and derivatives	Amino acids, peptides, and analogues	2077.09	7762.36	6825.73	6969.42	6383.6	1695.54	2279.43	2460.99	1109.19	1038.92	2423.12	6764.85	6274.81	4476.59	7990.94	1624.63	2184.96	918.181	1724.38	1251.88
neg_1715	(R)-2,3-Dihydroxy-3-methylbutanoate	40.1	20.8	13.3515	C5H10O4	133.052	0.7903	C04272	Valine, leucine and isoleucine biosynthesis(ko00290);;Pantothenate and CoA biosynthesis(ko00770);;Metabolic pathways(ko01100);;Biosynthesis of secondary metabolites(ko01110);;2-Oxocarboxylic acid metabolism(ko01210);;Biosynthesis of amino acids(ko01230)	--	--	--	--	HMDB0012141	19451-56-0	Organic compounds	Lipids and lipid-like molecules	Fatty Acyls	Fatty acids and conjugates	136.22	91.0604	140.517	73.779	77.0855	53.3778	45.0728	25.2985	163.093	84.1486	204.747	119.705	204.092	207.882	640.906	16.7545	135.894	19.875	22.427	85.4898
neg_1719	Estragole	40.8	14.8	-0.11875	C10H12O	169.063	0.7903	C10452	Phenylpropanoid biosynthesis(ko00940);;Biosynthesis of secondary metabolites(ko01110)	--	--	--	--	HMDB0034121	140-67-0	Organic compounds	Benzenoids	Phenol ethers	Anisoles	95.3601	15.0778	67.3403	8.79223	38.4787	13.0614	22.9937	18.3468	80.9829	40.3754	100.418	56.9929	60.3638	33.2437	38.7246	5.25371	39.0425	1.82968	1.23e-12	4.03449
neg_1720	L-Pipecolate	43.9	45.3	18.45	C6H11NO2	174.08	0.7903	C00408	Lysine degradation(ko00310);;Tropane, piperidine and pyridine alkaloid biosynthesis(ko00960);;Metabolic pathways(ko01100);;Biosynthesis of secondary metabolites(ko01110)	--	--	--	--	HMDB0000716	3105-95-1	Organic compounds	Organic acids and derivatives	Carboxylic acids and derivatives	Amino acids, peptides, and analogues	61.6903	20.6072	31.2454	31.6445	36.6362	15.8186	8.95237	13.099	49.9629	25.427	79.3685	55.5094	54.0026	37.4617	21.0217	6.77375	54.2031	14.5408	8.6568	1.23e-12
neg_1724	3-Hydroxy-4-hydroxymethyl-2-methylpyridine-5-carboxylate	41.7	31.8	21.7159	C8H9NO4	182.05	0.7903	C04773	Vitamin B6 metabolism(ko00750)	--	--	--	--	--	--	--	--	--	--	93.3249	189.809	201.144	201.402	315.329	52.5692	81.8336	75.5081	91.8835	82.8998	587.591	260.456	398.324	196.01	386.633	92.454	435.017	78.5824	73.4208	102.292
neg_1725	N1-Methyl-2-pyridone-5-carboxamide	40.3	21.9	11.0671	C7H8N2O2	187.03	0.7903	C05842	Nicotinate and nicotinamide metabolism(ko00760);;Metabolic pathways(ko01100)	--	--	--	--	HMDB0004193	701-44-0	Organic compounds	Organoheterocyclic compounds	Pyridines and derivatives	Pyridinecarboxylic acids and derivatives	59.197	13.0819	22.9195	35.4556	15.9204	22.1108	30.9341	12.3701	25.4648	11.8463	178.779	53.1351	73.6531	39.8268	25.6678	21.7152	84.7997	11.4723	5.50546	29.0139
neg_1729	Allitol	41.3	18	-1.89971	C6H14O6	203.053	0.7903	--	--	--	--	--	--	--	--	--	--	--	--	228.756	37.7223	127.336	4.82815	69.4411	59.9069	55.8949	68.8951	216.541	129.901	233.248	138.033	113.104	102.771	26.3739	18.4211	108.82	18.2641	30.6437	68.4296
neg_1730	Cyclo(Hyp-Val)	46	59.1	12.215	C10H16N2O3	211.111	0.7903	--	--	--	--	--	--	--	--	--	--	--	--	10.4387	139.636	172.511	117.222	114.088	58.6237	107.294	123.51	42.393	17.0949	30.6525	107.424	160.195	101.429	366.539	78.4146	34.1057	10.1791	45.9058	11.3189
neg_1734	Mansonone S	45.7	48.7	-7.75948	C15H18O3	245.116	0.7903	--	--	--	--	--	--	--	--	--	--	--	--	1406.6	2100.34	2536.63	3429.37	1973.61	1127.1	2030.31	2305.4	999.214	1093.1	1545.27	2288.99	2755.83	1362.15	2906.06	1921.89	1405.3	1393.32	2230.62	1502.57
neg_1741	gamma-L-Glutamyl-L-phenylalanine	45.3	33.6	-4.09575	C14H18N2O5	329.09	0.7903	--	--	--	--	--	--	HMDB0000594	7432-24-8	Organic compounds	Organic acids and derivatives	Carboxylic acids and derivatives	Amino acids, peptides, and analogues	844.902	996.83	704.124	597.982	733.697	902.388	229.198	842.649	364.334	617.619	1205.08	1046.04	650.998	1701.43	196.572	249.632	892.313	298.994	995.814	412.45
neg_1742	Cyclo(L-Trp-L-Phe)	40.7	32.3	25.9613	C20H19N3O2	332.149	0.7903	C22142	Metabolic pathways(ko01100);;Biosynthesis of secondary metabolites(ko01110)	--	--	--	--	--	--	--	--	--	--	302.219	627.229	926.976	1099.73	451.417	573.328	1035.72	1072.88	223.088	528.915	438.329	461.917	659.262	410.737	1499.43	1182.83	326.597	788.544	1132.83	588.41
neg_1745	Triptolide	40.2	64.5	21.7902	C20H24O6	359.158	0.7903	C09204	--	--	--	--	--	HMDB0259270	--	Organic compounds	Organoheterocyclic compounds	Oxepanes	--	1488.45	2190.51	2328.16	2550.92	2065.62	1308.92	1792.95	2134.91	1007.82	1096.8	2232.65	2674.13	3122.05	1867.66	3678.67	1957.21	1459.43	1423.43	1909.63	1017.43
neg_1748	6-Hydroxytryprostatin B	51.6	85.9	17.7216	C21H25N3O3	388.171	0.7903	C20513	Metabolic pathways(ko01100);;Biosynthesis of secondary metabolites(ko01110)	--	--	--	--	--	--	--	--	--	--	333.025	601.991	851.662	801.117	813.48	550.799	583.154	833.355	267.986	355.913	345.782	983.598	572.885	443.577	809.574	607.399	241.741	385.555	470.885	298.247
neg_1764	Propanoate	41.7	31.5	21.8532	C3H6O2	73.0311	0.7903	C00163	Propanoate metabolism(ko00640);;Nicotinate and nicotinamide metabolism(ko00760);;Metabolic pathways(ko01100)	--	--	--	--	HMDB0000237	1979-09-04	Organic compounds	Organic acids and derivatives	Carboxylic acids and derivatives	Carboxylic acids	124.941	39.5036	117.254	33.2408	74.2042	27.6227	22.0218	34.9735	91.9899	35.1473	398.332	136.057	184.034	192.354	446.75	10.5055	294.746	17.1779	25.6709	33.5287
neg_1765	Clorobiocin	45.8	74.3	10.0025	C35H37ClN2O11	741.214	0.7903	C12032	Biosynthesis of secondary metabolites(ko01110)	--	--	--	--	--	--	--	--	--	--	1153.67	443.225	429.861	353.412	403.164	423.397	479.587	528.737	1414.95	1065.03	1065.53	936.325	697.613	484.711	508.616	450.62	851.036	473.566	621.076	516.972
neg_1767	Homotrypanothione disulfide	46.6	96.2	7.5284	C28H49N9O10S2	756.285	0.7903	C16568	Glutathione metabolism(ko00480)	--	--	--	--	--	--	--	--	--	--	3030.84	1854.85	2600.33	1789.36	2353.09	1251.11	1695.84	1992.31	2541.37	1369.62	4145.54	3854.05	3833.12	1594.62	3482.99	1385.69	3023.79	1243.78	1570.55	1130.23
neg_1779	8-D-Olivosyl-landomycin	41.6	61.9	12.491	C25H24O9	995.31	0.7903	C18778	Biosynthesis of secondary metabolites(ko01110)	--	--	--	--	--	--	--	--	--	--	647.632	270.568	469.784	326.358	380.46	249.231	289.937	380.028	648.468	274.522	874.392	653.597	624.6	314.562	474.477	259.692	693.651	252.356	288.668	202.532
neg_1780	1,6-anhydro-β-D-glucose	44	32.8	10.6638	C6H10O5	161.047	0.79745	--	--	--	--	--	--	HMDB0000640	498-07-7	Organic compounds	Organoheterocyclic compounds	Oxepanes	--	619.752	753.54	1066.61	955.215	845.051	296.211	393.813	346.244	517.25	313.372	795.36	912.882	1029.6	846.847	775.373	255.576	931.088	253.375	223.66	332.821
neg_1784	Cyclo(Tyr-Leu)	44.8	39	-6.82223	C15H20N2O3	297.12	0.79745	--	--	--	--	--	--	--	--	--	--	--	--	2476.54	2161.45	8814.99	3030.45	2925.31	1479.09	3508.44	1943.04	1822.84	1658.26	1288.72	2347.97	3066.53	2504.77	11322.7	1579.64	1259.92	657.98	649.762	3842.16
neg_1786	Strigol	42.9	49.3	27.0709	C19H22O6	367.126	0.8046	C09190	Carotenoid biosynthesis(ko00906);;Biosynthesis of secondary metabolites(ko01110)	--	--	--	--	HMDB0036677	11017-56-4	Organic compounds	Lipids and lipid-like molecules	Prenol lipids	Terpene lactones	711.099	358.761	583.785	469.194	459.471	412.904	714.226	433.898	1725.95	1965.37	563.952	583.599	480.628	380.491	416.943	417.39	640.199	1194.37	2485.17	665.169
neg_1791	Strictosidine aglycone	50.4	80.4	-19.7981	C21H24N2O4	413.165	0.79745	C03309	Indole alkaloid biosynthesis(ko00901);;Metabolic pathways(ko01100);;Biosynthesis of secondary metabolites(ko01110)	--	--	--	--	--	--	--	--	--	--	1712.48	546.1	1905.78	816.631	801.664	507.273	1153.19	676.761	521.015	431.527	328.071	507.351	951.372	568.624	2600.23	491.162	456.761	291.717	400.267	488.072
neg_1793	Solatriose	40.4	49.2	4.95084	C18H32O15	509.151	0.79745	--	--	--	--	--	--	--	--	--	--	--	--	2415.73	1074.08	1288.71	1058.53	1090.91	794.789	1010.34	923.641	1609.59	1076.85	2322.33	1873.74	1685.47	947.498	1132.57	737.743	2029.91	846.214	801.284	831.352
neg_1794	6'-Oxogentamicin X2	49.1	80	-11.9118	C19H36N4O10	515.207	0.79745	C21267	Neomycin, kanamycin and gentamicin biosynthesis(ko00524);;Biosynthesis of secondary metabolites(ko01110)	--	--	--	--	--	--	--	--	--	--	28.7774	143.41	103.504	296.969	41.2364	223.18	258.559	193.515	266.936	36.2941	36.4055	182.005	47.1965	54.2823	214.175	228.04	5.07889	29.899	78.3586	19.7599
neg_1796	Sarcosine	41.4	31	20.2947	C3H7NO2	88.0422	0.79745	C00213	Glycine, serine and threonine metabolism(ko00260);;Arginine and proline metabolism(ko00330);;Metabolic pathways(ko01100)	--	--	--	--	HMDB0000271	107-97-1	Organic compounds	Organic acids and derivatives	Carboxylic acids and derivatives	Amino acids, peptides, and analogues	13.5341	14.002	16.0306	19.7998	24.6689	5.56998	7.94632	6.44405	13.4225	13.9583	17.8904	23.0315	27.2147	18.0166	27.1426	7.63407	13.0293	5.40946	10.9273	8.58009
neg_1798	LysoPE 15:1	40.6	59.4	-49.147	C20H40NO7P	472.202	0.811767	--	--	--	--	--	--	--	--	--	--	--	--	441.754	3537.49	4432.37	4730.52	2477.91	2679.98	3960.52	3378.21	247.871	1194.26	483.172	4205.26	1065.36	1636.93	2928.97	2355.75	155.664	813.787	1755.85	239.327
neg_1799	(S)-1-Pyrroline-5-carboxylate	51.7	87.9	-24.4997	C5H7NO2	134.02	0.8189	C03912	Alanine, aspartate and glutamate metabolism(ko00250);;Arginine and proline metabolism(ko00330);;Carbapenem biosynthesis(ko00332);;Metabolic pathways(ko01100);;Biosynthesis of secondary metabolites(ko01110);;Biosynthesis of amino acids(ko01230)	--	--	--	--	HMDB0001301	64199-88-8	Organic compounds	Organic acids and derivatives	Carboxylic acids and derivatives	Amino acids, peptides, and analogues	1.23e-12	7.48346	1.23e-12	1.23e-12	1.23e-12	5.00757	3.80929	10.5739	1.23e-12	15.3794	1.23e-12	3.43097	1.23e-12	1.23e-12	2.22854	21.3995	3.08107	11.9372	33.4537	24.857
neg_1800	(S)-Coclaurine	45.2	61.9	-22.327	C17H19NO3	320.1	0.8189	C06161	Isoquinoline alkaloid biosynthesis(ko00950);;Metabolic pathways(ko01100);;Biosynthesis of secondary metabolites(ko01110)	--	--	--	--	--	--	--	--	--	--	272.841	858.422	701.63	933.334	566.976	723.058	912.758	1781.27	1314.18	390.384	660.163	1190.27	494.969	917.609	864.643	651.422	635.777	586.809	574.918	860.419
neg_1801	Deacetylcephalosporin C	45.4	72.2	-41.6331	C14H19N3O7S	418.077	0.8189	C03112	Penicillin and cephalosporin biosynthesis(ko00311);;Metabolic pathways(ko01100);;Biosynthesis of secondary metabolites(ko01110)	--	--	--	--	--	--	--	--	--	--	0.130576	17.7853	7.5221	42.4069	14.2702	44.6604	33.3175	62.8683	1.23e-12	5.68654	21.4432	11.3253	2.31012	13.9069	1.6242	58.1203	28.6421	32.9628	1.38579	1.23e-12
neg_1803	Engeletin	48.3	89.1	-27.5412	C21H22O11	471.078	0.8332	--	--	--	--	--	--	--	--	--	--	--	--	19.0105	17.5343	26.3694	18.0772	24.1074	49.1223	37.4525	30.3877	14.3446	32.1721	39.1169	46.0555	8.234	24.0943	0.177949	47.0232	1.53606	31.2242	17.0859	4.47861
neg_1804	Betanin (Betanidin-5-O-glucoside)	46.2	86.4	-44.3945	C24H26N2O13	571.094	0.82605	--	--	--	--	--	--	--	--	--	--	--	--	46.2949	149.925	162.802	126.021	114	277.645	243.85	122.607	45.4374	152.618	23.4728	195.161	24.099	135.427	32.4716	172.251	6.3117	129.923	95.3702	13.3925
neg_1811	cis-2-Hydroxycinnamate	43	38.5	13.7197	C9H8O3	163.042	0.88325	C05838	Biosynthesis of various plant secondary metabolites(ko00999);;Biosynthesis of secondary metabolites(ko01110)	--	--	--	--	HMDB0041592	495-79-4	Organic compounds	Phenylpropanoids and polyketides	Cinnamic acids and derivatives	Hydroxycinnamic acids and derivatives	146.818	402.905	421.115	480.447	390.117	158.787	208.378	216.518	100.837	87.8373	130.021	379.787	272.286	218.58	393.984	142.883	101.661	75.9523	119.876	99.1211
neg_1815	Monocrotaline	45.7	83.6	37.6865	C16H23NO6	360.134	0.88325	C10350	--	--	--	--	--	HMDB0034363	315-22-0	Organic compounds	Organoheterocyclic compounds	Pyrrolizines	--	262.625	2055.69	1528.1	2296.6	1440.32	656.001	1097.86	1054.64	105.623	285.479	164.889	1229.85	865.606	812.073	1295.67	781.894	221.486	437.053	999.491	347.222
neg_1819	19-Chloroproansamitocin	48.3	84.1	-16.1753	C25H32ClNO6	522.182	0.88325	C20134	Biosynthesis of secondary metabolites(ko01110)	--	--	--	--	--	--	--	--	--	--	850.218	6649.39	10120.5	10189.5	6303.23	3490.9	5318.51	5368.77	619.263	772.462	1152.69	8024.58	2391.42	2076.49	4566.58	2555.56	634.451	821.006	1545.74	358.712
neg_1821	N-Acetyl-N6,N6,O-tridemethylpuromycin-5'-phosphate	47.9	60	-17.6712	C21H26N7O9P	596.141	0.88325	C07028	Metabolic pathways(ko01100);;Biosynthesis of secondary metabolites(ko01110)	--	--	--	--	--	--	--	--	--	--	174.682	467.09	638.117	552.621	524.148	118.149	217.095	231.001	186.142	71.0875	120.697	596.017	194.238	158.305	539.735	94.0849	105.078	89.615	101.53	35.1927
neg_1824	Theaflavin	47.7	79.3	10.7927	C29H24O12	563.126	0.8904	--	--	--	--	--	--	HMDB0005788	4670-05-07	Organic compounds	Phenylpropanoids and polyketides	Flavonoids	Flavans	1.23e-12	309.77	645.12	440.619	566.528	155.025	124.43	118.615	1.23e-12	61.3596	1.23e-12	319.045	1.23e-12	76.9848	529.473	13.6826	50.6152	1.23e-12	26.19	25.784
neg_1825	Adenine	42.2	27.5	13.6653	C5H5N5	134.049	0.9047	C00147	Purine metabolism(ko00230);;Zeatin biosynthesis(ko00908);;Metabolic pathways(ko01100);;Biosynthesis of secondary metabolites(ko01110);;Nucleotide metabolism(ko01232)	--	--	--	--	HMDB0000034	73-24-5	Organic compounds	Organoheterocyclic compounds	Imidazopyrimidines	Purines and purine derivatives	346.71	291.724	327.451	265.489	195.74	261.669	193.607	313.152	257.64	316.939	255.737	358.14	233.65	297.388	77.0086	257.702	205.586	301.335	362.626	212.262
neg_1827	Sarmentosin	43.3	42.3	-6.79013	C11H17NO7	274.091	0.9047	C08340	--	--	--	--	--	HMDB0030697	71933-54-5	Organic compounds	Lipids and lipid-like molecules	Fatty Acyls	Fatty acyl glycosides	166.565	100.891	204.647	64.7866	55.1383	142.009	256.954	150.294	162.545	124.739	19.745	177.421	97.8384	173.796	284.457	24.8823	29.6588	12.6497	59.0384	102.511
neg_1828	Deoxyguanosine	50.5	67.4	9.01365	C10H13N5O4	312.097	0.9047	C00330	Purine metabolism(ko00230);;Metabolic pathways(ko01100);;Nucleotide metabolism(ko01232);;ABC transporters(ko02010)	--	--	--	--	HMDB0000085	961-07-9	Organic compounds	Nucleosides, nucleotides, and analogues	Purine nucleosides	Purine 2'-deoxyribonucleosides	956.765	737.91	745.023	727.243	543.452	717.636	626.801	853.635	702.457	899.412	734.28	913.625	611.825	799.467	243.659	780.276	648.831	911.935	978.26	570.807
neg_1831	D-Glucono-1,5-lactone	44.2	48.2	-24.4414	C6H10O6	223.042	0.919	C00198	Pentose phosphate pathway(ko00030);;Metabolic pathways(ko01100);;Biosynthesis of secondary metabolites(ko01110);;Carbon metabolism(ko01200)	--	--	--	--	HMDB0000150	90-80-2	Organic compounds	Organic oxygen compounds	Organooxygen compounds	Carbohydrates and carbohydrate conjugates	75.2227	37.7854	28.7539	36.4387	25.2028	30.8891	30.0191	26.9234	41.1693	53.781	80.7692	75.0815	36.8465	44.67	48.6765	33.6693	65.6135	42.465	36.8258	27.8738
neg_1834	TRIBOA-glucoside	46.9	75.7	28.4788	C14H17NO10	380.07	0.919	C18062	Benzoxazinoid biosynthesis(ko00402);;Biosynthesis of various plant secondary metabolites(ko00999);;Metabolic pathways(ko01100);;Biosynthesis of secondary metabolites(ko01110)	--	--	--	--	--	--	--	--	--	--	17.9758	75.774	70.4823	69.1456	67.2445	89.1286	46.959	53.5127	21.8126	46.8678	46.8562	118.503	64.8366	78.2681	16.8257	66.3523	36.1701	91.5502	96.2282	48.1856
neg_1835	N-Acetyl-L-Tryptophan	42.9	32.9	8.39433	C13H14N2O3	267.077	0.933283	--	--	--	--	--	--	HMDB0013713	1218-34-4	Organic compounds	Organic acids and derivatives	Carboxylic acids and derivatives	Amino acids, peptides, and analogues	331.184	363.961	447.472	501.337	419.255	207.934	310.338	257.922	351.019	276.167	230.756	404.488	324.703	357.719	306.629	116.775	225.578	174.418	174.76	198.635
neg_1841	Aspartyl-Arginine	45.3	49.8	-14.2311	C10H19N5O5	288.127	0.94045	--	--	--	--	--	--	HMDB0028747	--	Organic compounds	Organic acids and derivatives	Carboxylic acids and derivatives	Amino acids, peptides, and analogues	1.33228	19.9401	25.0849	47.1095	4.07108	35.4004	69.0182	56.7261	0.484422	8.98095	3.49827	9.55968	3.11222	2.67368	72.9056	76.1168	1.23e-12	35.6245	61.76	31.1013
neg_1852	CMP-5-N-acetyl-7-N-(D-alanyl)-legionaminic acid	51.1	71.7	13.4341	C23H37N6O15P	713.213	0.95475	C22251	Metabolic pathways(ko01100);;Biosynthesis of nucleotide sugars(ko01250)	--	--	--	--	--	--	--	--	--	--	890.65	223.922	493.751	227.801	256.469	298.664	496.276	390.8	1308.99	415.053	2402.59	1663.71	520.042	791.019	348.479	128.204	1598.3	199.941	262.107	178.321
neg_1853	Succinic acid	41.8	25.3	13.0812	C4H6O4	117.021	0.961883	C00042	Citrate cycle (TCA cycle)(ko00020);;Oxidative phosphorylation(ko00190);;Alanine, aspartate and glutamate metabolism(ko00250);;Lysine degradation(ko00310);;Tyrosine metabolism(ko00350);;Phenylalanine metabolism(ko00360);;Pyruvate metabolism(ko00620);;Glyoxylate and dicarboxylate metabolism(ko00630);;Propanoate metabolism(ko00640);;Butanoate metabolism(ko00650);;Nicotinate and nicotinamide metaboli…	LMFA01170043	Fatty Acyls [FA]	Fatty Acids and Conjugates [FA01]	Dicarboxylic acids [FA0117]	HMDB0000254	110-15-6	Organic compounds	Organic acids and derivatives	Carboxylic acids and derivatives	Dicarboxylic acids and derivatives	2344.07	870.59	2461.02	830.459	1475.76	1174.42	1250.77	1220.28	1891.36	1384.9	8263.36	4053.09	2397.31	3440.04	10471.9	715.5	6515.5	813.135	1042.08	1189.85
neg_1858	Icariside I	45.4	55.3	18.7089	C27H30O11	551.163	0.961883	--	--	LMPK12112004	Polyketides [PK]	Flavonoids [PK12]	Flavones and Flavonols [PK1211]	HMDB0253343	--	Organic compounds	Phenylpropanoids and polyketides	Flavonoids	Flavonoid glycosides	234.851	308.712	596.357	366.868	146.644	216.687	297.159	239.901	244.94	138.782	517.367	530.09	82.9159	218.435	250.362	50.2611	426.277	44.9108	93.2251	40.4116
neg_1860	Carboxyatractyloside tripotassium salt	46.8	58.4	-2.43873	C31H46O18S2	769.203	0.961883	--	--	--	--	--	--	--	--	--	--	--	--	1.23e-12	28.3186	1.23e-12	12.0274	1.23e-12	93.884	12.2792	46.5842	40.8447	8.99889	1.23e-12	14.3798	1.23e-12	7.57399	1.23e-12	25.3176	1.23e-12	107.233	50.5391	31.3782
neg_1863	Succinic anhydride	48.5	65.1	17.659	C4H4O3	99.0105	0.969033	C19524	--	--	--	--	--	HMDB0032523	108-30-5	Organic compounds	Organic acids and derivatives	Carboxylic acids and derivatives	Dicarboxylic acids and derivatives	64.9739	18.4601	68.981	24.3612	28.2456	22.8349	31.0234	33.5559	44.3667	34.7288	234.199	111.393	67.4094	101.373	306.976	15.1894	200.954	10.6676	22.2596	21.3353
neg_1864	Prolyl-Threonine	49.1	73.9	24.3674	C9H16N2O4	237.091	0.976183	--	--	--	--	--	--	HMDB0029027	--	Organic compounds	Organic acids and derivatives	Carboxylic acids and derivatives	Amino acids, peptides, and analogues	5.40433	71.4381	71.0055	147.627	35.3348	98.2754	212.754	149.278	24.9205	64.9085	1.23e-12	14.8486	30.9849	25.6011	96.7734	199.234	22.6002	111.333	178.885	97.1109
neg_1865	Aspartyl-Leucine	45.4	43.1	11.2398	C10H18N2O5	245.117	0.976183	--	--	--	--	--	--	HMDB0028757	--	Organic compounds	Organic acids and derivatives	Carboxylic acids and derivatives	Amino acids, peptides, and analogues	434.219	1090.96	1060.94	1879.82	516.508	1169.18	2326.64	1732.85	264.946	791.289	311.91	718.106	644.272	541.51	872.335	2539.91	359.025	1665.69	2338.65	1422.89
neg_1873	5-Methyl-2'-deoxycytidine	40.1	42.8	35.2658	C10H15N3O4	262.089	0.997633	C03592	--	--	--	--	--	HMDB0002224	838-07-3	Organic compounds	Nucleosides, nucleotides, and analogues	Pyrimidine nucleosides	Pyrimidine 2'-deoxyribonucleosides	1.23e-12	19.5471	79.3317	67.6435	2.50572	25.7442	92.4574	69.9234	1.23e-12	31.8996	1.23e-12	19.5152	1.23e-12	38.8714	94.3725	66.7833	1.23e-12	36.3229	81.9299	20.5947
neg_1877	Psilocybin	43.5	24	-3.3328	C12H17N2O4P	329.09	1.00478	C07576	Indole alkaloid biosynthesis(ko00901);;Metabolic pathways(ko01100);;Biosynthesis of secondary metabolites(ko01110)	--	--	--	--	--	--	--	--	--	--	714.153	971.513	679.299	554.642	567.247	1393.49	409.279	1097.81	323.451	819.642	876.958	915.38	359.034	1712.27	189.232	325.879	639.592	316.773	1400.77	415.042
neg_1889	20-Hydroxyleukotriene E4	47.7	57.4	4.69658	C23H37NO6S	500.234	1.08985	C03577	Arachidonic acid metabolism(ko00590)	--	--	--	--	--	--	--	--	--	--	1.23e-12	477.276	2019.58	787.974	337.141	62.0807	334.944	198.74	14.529	20.1156	23.454	2022.92	68.4011	1645.96	3001.74	180.509	1.23e-12	31.625	189.425	20.6376
neg_1890	2-Methyl-3-oxopropanoate	43.5	39.7	16.7794	C4H6O3	101.026	1.10415	C00349	Valine, leucine and isoleucine degradation(ko00280)	--	--	--	--	HMDB0001172	6236-08-04	Organic compounds	Organic oxygen compounds	Organooxygen compounds	Carbonyl compounds	9.14806	106.464	65.114	101.906	72.2518	57.7564	54.2953	49.9713	3.02963	3.56109	13.1856	69.5987	61.8616	55.6804	82.3451	30.806	9.68054	8.15824	40.3731	1.52341
neg_1892	Acetyl-DL-Leucine	48	68.4	11.8886	C8H15NO3	172.1	1.10415	--	--	--	--	--	--	HMDB0011756	1188-21-2	Organic compounds	Organic acids and derivatives	Carboxylic acids and derivatives	Amino acids, peptides, and analogues	9.40471	169.58	120.391	205.437	81.9431	56.4743	92.7318	66.755	2.27176	1.23e-12	8.53158	130.492	87.2308	72.5008	190.531	66.1381	1.23e-12	30.5819	61.2553	9.00393
neg_1895	Myristicin	40.2	25.7	8.53572	C11H12O3	213.055	1.1113	C10480	--	--	--	--	--	HMDB0035873	607-91-0	Organic compounds	Organoheterocyclic compounds	Benzodioxoles	--	88.7317	28.8566	62.5351	37.2757	57.9491	12.3866	37.4495	25.8009	88.016	79.0085	87.3206	112.802	29.3834	85.1169	62.0089	19.879	25.7177	69.1277	24.3039	9.7883
neg_1897	Deacetoxycephalosporin C	45	67	41.06	C14H19N3O6S	402.112	1.11845	C06565	Penicillin and cephalosporin biosynthesis(ko00311);;Metabolic pathways(ko01100);;Biosynthesis of secondary metabolites(ko01110)	--	--	--	--	--	--	--	--	--	--	1.23e-12	86.2208	87.437	128.422	68.1088	14.1185	18.7133	18.1063	1.23e-12	0.0792782	10.0684	113.329	46.8751	68.8349	119.657	14.1008	4.87842	6.18606	24.0913	7.17727
neg_1903	Tranexamic Acid	43.4	32.3	13.7364	C8H15NO2	202.111	1.1256	C12535	--	--	--	--	--	HMDB0014447	1197-18-8	Organic compounds	Organic acids and derivatives	Carboxylic acids and derivatives	Amino acids, peptides, and analogues	846.968	4771.8	3171.08	4255.96	2869.46	1382.17	1992.23	1782.69	722.376	506.15	1201.39	3224.91	2664.08	2166.05	4976.53	1135.29	705.465	538.019	1211.56	505.101
neg_1907	5,2'-Dihydroxy-7-methoxyflavanone	43	26.7	1.53017	C16H14O5	285.077	1.1256	--	--	LMPK12140126	Polyketides [PK]	Flavonoids [PK12]	Flavanones [PK1214]	--	--	--	--	--	--	4.14286	154.526	255.86	138.393	122.256	62.3728	60.9462	84.4247	3.31674	15.9052	2.99831	191.724	27.8067	63.0769	20.3509	96.5362	6.71917	53.4196	72.4051	76.099
neg_1909	Sophoraflavanone B	45.4	44.4	7.35084	C20H20O5	361.108	1.1256	C18023	--	LMPK12140279	Polyketides [PK]	Flavonoids [PK12]	Flavanones [PK1214]	--	--	--	--	--	--	2027.53	6872.8	8697.43	6684.7	5772.02	1770.04	3358.96	2834.36	1295.89	1467.48	2609.78	7606.35	4742.92	5377.9	6378.04	2527.66	2647.52	1575.99	2673.89	2227.51
neg_1910	Echinopsine	42.1	27	5.1095	C10H9NO	377.152	1.13275	C10663	--	--	--	--	--	--	--	--	--	--	--	2.60548	108.204	149.175	116.086	110.128	0.584487	93.2185	58.1349	6.17669	3.35909	15.1441	79.9404	91.0206	54.0657	144.958	41.2649	13.5133	32.5224	73.1462	42.2626
neg_1918	4-Methylaminobutyrate	40.2	38.4	37.8686	C5H11NO2	138.058	1.14703	C15987	Nicotinate and nicotinamide metabolism(ko00760);;Metabolic pathways(ko01100)	--	--	--	--	--	--	--	--	--	--	34.2428	30.4117	4.80324	36.5348	49.3966	10.7391	28.7233	13.8143	37.6197	62.7791	107.09	40.2033	63.1221	48.3536	62.5796	52.4076	161.05	65.4828	52.2253	69.4323
neg_1919	5-Methylthiopentanaldoxime	42.7	54	45.6212	C6H13NOS	182.048	1.14703	C17245	Glucosinolate biosynthesis(ko00966);;2-Oxocarboxylic acid metabolism(ko01210)	--	--	--	--	--	--	--	--	--	--	252.417	220.545	68.654	261.496	382.196	85.5611	191.685	112.482	257.851	432.011	935.373	219.167	465.76	333.27	451.769	390.1	1255.25	463.343	355.577	447.697
neg_1921	7-Deoxyloganetic alcohol	43.6	34.4	13.7165	C10H16O3	219.082	1.14703	C22014	Monoterpenoid biosynthesis(ko00902);;Metabolic pathways(ko01100);;Biosynthesis of secondary metabolites(ko01110)	--	--	--	--	--	--	--	--	--	--	176.09	118.903	125.972	178.409	104.739	116.089	180.451	188.515	41.7983	77.624	74.4018	164.177	70.3933	106.112	178.735	163.958	59.1405	111.923	134.048	96.8686
neg_1927	Lysyl-Methionine	49.5	60.5	-5.33053	C11H23N3O3S	322.143	1.16133	--	--	--	--	--	--	HMDB0028957	97729-52-7	Organic compounds	Organic acids and derivatives	Carboxylic acids and derivatives	Amino acids, peptides, and analogues	22.0249	78.073	132.037	2035.16	236.703	225.164	3976.61	5697.42	4126.91	239.689	73.818	54.3658	109.723	60.1781	43888.2	1433.38	348.625	228.765	8883.61	1406.4
neg_1928	Graveoline	45.3	44.9	-6.40395	C17H13NO3	324.086	1.16848	C10689	--	--	--	--	--	HMDB0033480	485-61-0	Organic compounds	Organoheterocyclic compounds	Quinolines and derivatives	Quinolones and derivatives	6.30136	100.142	71.5335	76.6119	34.3852	38.0135	46.8945	58.6405	0.0972242	41.4277	12.644	189.24	1.23e-12	222.212	51.9092	62.4097	21.6301	30.9092	54.0618	52.8366
neg_1929	Olivetol	41.7	20.4	-0.217631	C11H16O2	201.09	1.17563	--	--	--	--	--	--	--	--	--	--	--	--	9.88078	19.6928	10.425	14.1522	2.72123	30.9691	38.5725	28.1829	3.14762	26.7392	3.56916	27.7161	4.92836	13.88	1.23e-12	35.8216	1.38099	16.6227	23.0475	23.8242
neg_1932	Homogentisic acid	40.7	17.5	11.8192	C8H8O4	167.037	1.18993	C00544	Ubiquinone and other terpenoid-quinone biosynthesis(ko00130);;Tyrosine metabolism(ko00350);;Metabolic pathways(ko01100);;Biosynthesis of cofactors(ko01240)	--	--	--	--	HMDB0000130	451-13-8	Organic compounds	Benzenoids	Benzene and substituted derivatives	Phenylacetic acids	496.941	1078.15	184.794	80.3507	49.289	1202.5	1677.39	2871.44	184.901	363.009	285.445	1075.36	151.965	857.815	34.7282	1491.34	230.887	1240.96	1508.39	501.188
neg_1939	6'-Oxolividamine	47.2	64.5	-23.6244	C12H23N3O6	326.126	1.19708	C21256	Neomycin, kanamycin and gentamicin biosynthesis(ko00524);;Biosynthesis of secondary metabolites(ko01110)	--	--	--	--	--	--	--	--	--	--	2165.71	10203	5887.78	9475.57	7926.1	4816.11	5377.67	5387.8	1435.52	1423.41	1979.39	6116.23	6225.27	3790.36	10973.5	2770.28	2129.2	1202.11	3118.74	506.312
neg_1941	5,10-Methylenetetrahydromethanopterin	49.4	62.2	-8.68248	C31H45N6O16P	833.254	1.20423	C04377	Metabolic pathways(ko01100);;Carbon metabolism(ko01200)	--	--	--	--	HMDB0060401	--	Organic compounds	Nucleosides, nucleotides, and analogues	Pyrimidine nucleosides	--	2108	895.952	1355.12	1110.61	614.065	1130.65	1590.82	1852.47	3881.16	1659.04	3051.4	4174.03	1086.62	1030.24	581.009	1371.85	3160.18	2083.99	1673.96	1260.31
neg_1943	Scopolamine	49	56.6	-2.89297	C17H21NO4	302.139	1.21138	C01851	Tropane, piperidine and pyridine alkaloid biosynthesis(ko00960);;Metabolic pathways(ko01100);;Biosynthesis of secondary metabolites(ko01110)	--	--	--	--	HMDB0003573	51-34-3	Organic compounds	Organic acids and derivatives	Hydroxy acids and derivatives	Beta hydroxy acids and derivatives	381.411	868.71	931.501	1794.14	348.32	1493.07	2835.62	2402.13	333.352	1015.41	199.365	384.591	327.236	412.069	3049.44	3045.98	374.216	1894.56	2812.99	1363.81
neg_1946	N6-(L-1,3-Dicarboxypropyl)-L-lysine	45.4	65.8	49.5799	C11H20N2O6	297.12	1.23282	C00449	Lysine biosynthesis(ko00300);;Lysine degradation(ko00310);;Metabolic pathways(ko01100);;Biosynthesis of secondary metabolites(ko01110);;Biosynthesis of amino acids(ko01230)	--	--	--	--	HMDB0000279	997-68-2	Organic compounds	Organic acids and derivatives	Carboxylic acids and derivatives	Amino acids, peptides, and analogues	6480.55	6584.93	25998.6	9486.25	7061.25	6130.07	15270.2	7043.64	5454.46	5361.73	3161.23	7205.94	7155.58	7453.19	40263.1	5779.47	2921.4	2307.24	1926.33	14630.8
neg_1947	Cannabidiolic acid	47.4	52.7	12.8946	C22H30O4	393.188	1.23282	C10784	Biosynthesis of various plant secondary metabolites(ko00999);;Metabolic pathways(ko01100);;Biosynthesis of secondary metabolites(ko01110)	LMPK13120003	Polyketides [PK]	Aromatic polyketides [PK13]	Other aromatic polyketides [PK1312]	HMDB0249587	--	Organic compounds	Benzenoids	Benzene and substituted derivatives	Benzoic acids and derivatives	1.23e-12	566.351	203.49	1204.08	222.561	440.698	1042.17	976.293	5.5411	31.0323	90.8247	154.27	92.6055	132.682	1219.9	876.122	0.0841005	402.414	757.38	95.5166
neg_1953	5-Acetamidopentanoate	41.9	31.5	14.1273	C7H13NO3	204.09	1.24713	C03087	Lysine degradation(ko00310);;Metabolic pathways(ko01100)	--	--	--	--	HMDB0012175	--	Organic compounds	Lipids and lipid-like molecules	Fatty Acyls	Fatty acids and conjugates	130.346	135.601	147.72	162.755	218.769	87.3645	110.044	76.1399	182.605	230.973	357.692	324.985	202.03	185.99	149.285	154.985	458.865	223.11	193.568	141.415
neg_1958	LysoPE 18:4	48.5	53.9	5.44055	C23H40NO7P	494.231	1.25427	--	--	--	--	--	--	--	--	--	--	--	--	15.6194	511.293	93.1958	617.77	8.08107	474.216	1319.19	1209.94	14.8255	108.335	5.39056	105.99	10.8728	110.228	1507.94	762.348	5.07494	192.5	805.816	9.54962
neg_1962	Leu-Arg	41.4	34.1	-27.998	C12H25N5O3	332.183	1.26143	--	--	--	--	--	--	HMDB0028923	--	Organic compounds	Organic acids and derivatives	Carboxylic acids and derivatives	Amino acids, peptides, and analogues	111.936	1729.65	1016.26	3537.48	557.128	2666.74	7730.83	5868	558.884	2756.18	46.8518	532.549	585.915	496.111	5771.38	7293.86	666.264	2304.97	4300.9	1062.28
neg_1963	9-Hydroperoxy-10E,12,15Z-octadecatrienoic acid	43.6	56.4	-12.1792	C18H30O4	345.18	1.26143	--	--	LMFA02000108	Fatty Acyls [FA]	Octadecanoids [FA02]	Other Octadecanoids [FA0200]	--	--	--	--	--	--	206.114	887.137	1006.62	1681.06	394.289	1452.15	2848.7	2558.5	730.208	754.602	66.9196	360.9	328.736	400.259	3262.39	2521.58	406.342	1403.29	2645.04	1026.91
neg_1967	Matairesinol	44.4	63.6	21.7623	C20H22O6	357.142	1.26857	C10682	Biosynthesis of various plant secondary metabolites(ko00999);;Metabolic pathways(ko01100);;Biosynthesis of secondary metabolites(ko01110)	--	--	--	--	HMDB0035698	580-72-3	Organic compounds	Lignans, neolignans and related compounds	Furanoid lignans	Tetrahydrofuran lignans	0.260793	1.23e-12	1.23e-12	1.23e-12	1.23e-12	35.7998	1.23e-12	4.3333	58.2485	77.0542	1.3146	1.23e-12	1.23e-12	0.114888	1.23e-12	0.0199204	1.23e-12	42.4745	34.3155	198.931
neg_1968	Swertiamarin	47.5	58.9	-7.27438	C16H22O10	395.093	1.26857	C09800	--	--	--	--	--	HMDB0258644	--	Organic compounds	Organic oxygen compounds	Organooxygen compounds	Carbohydrates and carbohydrate conjugates	42.7802	390.092	421.841	542.421	373.307	216.34	221.276	190.426	34.6945	86.8128	90.2781	252.351	241.389	178.959	273.522	223.829	166.742	93.7823	118.591	104.182
neg_1971	9-Demethylmunduserone	47.7	59.2	-14.3585	C18H16O6	715.194	1.26857	C16189	Isoflavonoid biosynthesis(ko00943);;Biosynthesis of secondary metabolites(ko01110)	--	--	--	--	--	--	--	--	--	--	564.711	347.125	235.247	229.048	157.881	107.413	100.029	119.293	518.031	237.983	716.129	649.19	234.714	417.433	17.9151	105.774	462.5	242.072	149.51	159.32
neg_1972	Depressine	49.4	87.2	-30.2493	C30H40O18	723.17	1.26857	--	--	--	--	--	--	--	--	--	--	--	--	2014.13	514.796	540.058	538.194	476.942	835.486	822.862	711.481	2265.51	1060.21	2713.27	2026.3	852.659	909.936	181.633	733.509	1762.04	1247.73	1034.94	947.944
neg_1975	γ-Glutamyltyrosine	42.8	42.5	26.2427	C14H18N2O6	309.117	1.28287	--	--	--	--	--	--	HMDB0011741	7432-23-7	Organic compounds	Organic acids and derivatives	Carboxylic acids and derivatives	Amino acids, peptides, and analogues	2086.31	2160.86	2671.87	2994.76	1618.56	2145.54	3475.81	3143.71	1890.28	2521.6	1892.64	4203.11	1868.08	2163.02	2139.49	2505.38	2099.71	2284.98	2782.15	2373.75
neg_1976	2-Propylmalate	43.2	27.2	-2.65763	C7H12O5	411.15	1.27573	C05994	Pyruvate metabolism(ko00620)	--	--	--	--	--	--	--	--	--	--	235.016	250.975	338.788	354.529	137.723	234.644	346.52	312.103	112.252	243.895	42.1514	335.061	61.5563	212.532	178.47	371.426	107.781	264.007	344.913	114.55
neg_1979	UDP-3-O-(3-hydroxytetradecanoyl)-D-glucosamine	40.9	33.7	22.7348	C29H51N3O18P2	790.275	1.27573	C06022	Metabolic pathways(ko01100)	--	--	--	--	--	--	--	--	--	--	451.207	1035.12	607.271	1393.83	861.255	1077.23	1504	1267.16	480.368	730.753	968.506	1892.79	755.86	492.976	168.235	1049.35	1102.18	865.329	740.788	93.5029
neg_1984	trans-Cinnamate	40.7	21.3	15.04	C9H8O2	147.047	1.29718	C00423	Ubiquinone and other terpenoid-quinone biosynthesis(ko00130);;Phenylalanine metabolism(ko00360);;Phenylpropanoid biosynthesis(ko00940);;Biosynthesis of various alkaloids(ko00996);;Biosynthesis of various plant secondary metabolites(ko00999);;Metabolic pathways(ko01100);;Biosynthesis of secondary metabolites(ko01110)	--	--	--	--	HMDB0000930	140-10-3	Organic compounds	Phenylpropanoids and polyketides	Cinnamic acids and derivatives	Cinnamic acids	941.031	2810.16	2766.73	3592.8	2477.63	1576.84	1898.21	1781.08	551.067	900.084	599.643	2096.14	1703.08	1632.54	2651.83	1445.46	1148.76	706.44	1176.76	749.431
neg_1997	Cimicifugamide A	43.5	46.5	-14.0605	C24H29NO10	526.142	1.30432	--	--	--	--	--	--	--	--	--	--	--	--	203.694	83.9264	57.3584	15.0424	58.3037	45.7255	51.1657	33.6328	135.527	95.8942	316.328	246.413	148.203	55.0236	53.1188	15.8571	293.742	63.7702	31.0598	25.5676
neg_1999	3D-3,5/4-Trihydroxycyclohexane-1,2-dione	44.1	42.1	13.4027	C6H8O5	159.032	1.31148	C04287	Inositol phosphate metabolism(ko00562);;Metabolic pathways(ko01100)	--	--	--	--	--	--	--	--	--	--	1.23e-12	1.23e-12	1.23e-12	0.244048	1.23e-12	44.9767	59.3653	89.8791	1.23e-12	3.05562	1.23e-12	1.23e-12	1.23e-12	1.23e-12	5.00492	43.7591	1.23e-12	13.3157	94.2732	1.01973
neg_2002	Biochanin A-beta-D-glucoside	43.8	46.9	17.762	C22H22O10	445.122	1.31148	C05376	Isoflavonoid biosynthesis(ko00943)	--	--	--	--	--	--	--	--	--	--	22.2739	348.285	373.165	329.079	514.002	135.201	204.476	227.851	7.90667	77.2547	5.0366	221.38	279.804	142.739	286.645	149.932	118.853	48.905	111.585	23.2353
neg_2013	3-Dimethylallyl-4-hydroxymandelic acid	43.9	30.9	3.64889	C13H16O4	257.08	1.35437	C12457	Biosynthesis of secondary metabolites(ko01110)	--	--	--	--	HMDB0000822	1198-84-1	Organic compounds	Benzenoids	Phenols	1-hydroxy-2-unsubstituted benzenoids	297.557	6.249	66.7722	45.431	64.5704	8.45065	2.25462	2.92025	62.0107	27.4194	448.767	157.427	161.946	69.6316	3.31646	1.23e-12	265.334	82.7798	12.7888	2.87755
neg_2016	Gibberellin A4	42.1	45.6	31.8278	C19H24O5	353.148	1.34722	C11864	Diterpenoid biosynthesis(ko00904);;Metabolic pathways(ko01100);;Biosynthesis of secondary metabolites(ko01110);;Plant hormone signal transduction(ko04075)	LMPR0104170021	Prenol Lipids [PR]	Isoprenoids [PR01]	C20 isoprenoids (diterpenes) [PR0104]	HMDB0303447	--	Organic compounds	Lipids and lipid-like molecules	Prenol lipids	Diterpenoids	1.23e-12	6.62699	8.0334	59.0492	1.23e-12	123.317	287.425	247.402	10.328	9.86642	1.23e-12	7.98349	1.23e-12	5.01283	223.894	188.414	1.23e-12	7.51835	201.058	1.23e-12
neg_2017	Oridonin	47.1	50.6	-7.8687	C20H28O6	363.178	1.34722	--	--	--	--	--	--	HMDB0242516	--	Organic compounds	Lipids and lipid-like molecules	Prenol lipids	Diterpenoids	1.72532	562.634	187.06	1314.71	126.275	537	1284.77	1183.75	102.988	56.1197	21.6728	49.9885	36.3948	87.4907	1995.24	1132.2	94.9745	527.78	1015.54	138.569
neg_2026	6-hydroxy-2-[2-(4-methoxyphenyl)ethyl]chromone	40.1	27.8	25.1196	C18H16O4	295.105	1.3751	--	--	--	--	--	--	--	--	--	--	--	--	9689.72	6856.75	8430.76	9555.14	5585.26	6768.42	8338.24	7310.68	6992.06	6215.27	7454.63	12646.5	6723.91	6469.29	3957.31	7298.83	7622.34	8026.41	7532.6	4603.89
neg_2027	Phenyl-beta-D-glucopyranoside	41.4	27.5	10.8751	C12H16O6	301.096	1.38223	--	--	--	--	--	--	--	--	--	--	--	--	1182.35	286.764	184.456	131.033	137.095	278.236	206.698	252.557	502.604	724.975	1749.81	364.351	630.813	241.343	7.31931	212.311	1161.48	458.642	377.59	578.492
neg_2028	Nebramine	51.5	64.2	1.83265	C12H26N4O5	327.166	1.38223	C21259	Neomycin, kanamycin and gentamicin biosynthesis(ko00524);;Biosynthesis of secondary metabolites(ko01110)	--	--	--	--	--	--	--	--	--	--	50.1871	341.791	236.164	273.861	198.753	311.032	997.697	601.565	323.932	58.3407	29.5834	263.557	186.842	168.835	2046.62	449.923	205.898	147.439	855.834	128.245
neg_2030	Ophiogenin 3-O-α-L-rhamnopyranosyl-(1→2)-β-D-glucopyranoside	48.8	61.6	12.2654	C12H22O10	347.1	1.38223	--	--	--	--	--	--	--	--	--	--	--	--	11101	2286.36	1497.65	1187.84	1018.91	2316.6	2233.8	2355.65	4952.32	6585.21	16823.4	3296.99	5307.92	1921.29	366.283	2142.76	11047.6	3725.32	3419.2	4620.14
neg_2041	2-Amino-5-oxohexanoate	45.5	45.1	12.4781	C6H11NO3	144.068	1.43945	C05825	Lysine degradation(ko00310);;D-Amino acid metabolism(ko00470);;Metabolic pathways(ko01100)	--	--	--	--	--	--	--	--	--	--	9.69164	5.5137	87.037	57.9626	2.79025	242.925	270.383	10.9838	8.83018	85.7069	0.356135	359	6.16734	33.8482	47.1069	196.365	12.8855	18.2112	291.432	44.0344
neg_2047	Morphine	40.7	25.7	-18.3519	C17H19NO3	320.101	1.44658	C01516	Isoquinoline alkaloid biosynthesis(ko00950);;Metabolic pathways(ko01100);;Biosynthesis of secondary metabolites(ko01110)	--	--	--	--	HMDB0014440	57-27-2	Organic compounds	Alkaloids and derivatives	Morphinans	--	43.1708	930.583	645.595	1055.21	354.562	1214.78	1363.99	2641.32	319.343	341.837	104.909	1168.34	85.4548	918.334	621.117	980.616	331.203	763.718	592.108	1279.19
neg_2050	Genipin	40.2	21.9	15.5151	C11H14O5	261.057	1.48233	C09780	--	--	--	--	--	HMDB0035830	6902-77-8	Organic compounds	Lipids and lipid-like molecules	Prenol lipids	Monoterpenoids	29.4014	1.54314	8.73795	1.23e-12	1.23e-12	54.0556	17.7118	47.0064	23.4986	31.0147	1.23e-12	0.0328075	1.23e-12	37.4006	0.0571102	2.91097	9.15914	15.7106	31.4134	4.24687
neg_2053	Hellicoside	49.7	81	31.8788	C29H36O17	701.213	1.48948	C10466	--	--	--	--	--	--	--	--	--	--	--	3447.01	1237.26	1861.59	1059.58	1009.26	1909.93	2343.86	2658.88	3549.12	1624.96	1994.77	3471.7	955.353	815.841	494.936	1215.09	1638.08	1566.4	1855.22	574.431
neg_2057	Isoquinoline-1-carboxylic acid	50.5	0	-8.44619	C10H7NO2	345.085	1.49663	--	--	--	--	--	--	--	--	--	--	--	--	406.034	103.472	72.7866	28.7026	133.019	278.292	28.4359	62.0326	221.199	273.376	610.906	226.794	176.841	404.665	3.27305	20.9903	387.432	63.426	203.87	41.1507
neg_2060	Wilfordinine B	44.3	60.8	22.5805	C38H47NO19	820.285	1.49663	--	--	--	--	--	--	--	--	--	--	--	--	21.2356	317.361	197.658	236.36	69.8805	467.55	708.282	635.476	72.8215	55.1465	1.23e-12	771.818	13.2578	1.23e-12	24.5837	195.413	1.23e-12	92.356	325.443	1.23e-12
neg_2061	Leucyl-Tryptophan	46.4	65.9	-32.5233	C17H23N3O3	338.138	1.51093	--	--	--	--	--	--	HMDB0028940	--	Organic compounds	Organic acids and derivatives	Carboxylic acids and derivatives	Amino acids, peptides, and analogues	1.23e-12	1.23e-12	7.34465	18.9642	1.23e-12	41.5716	69.5787	44.1762	0.196715	15.5533	1.23e-12	1.23e-12	1.23e-12	4.4299	72.784	58.7418	1.23e-12	30.5764	51.302	17.8297
neg_2062	Allysine	46.1	48.9	3.33494	C6H11NO3	349.163	1.51093	C04076	Lysine biosynthesis(ko00300);;Lysine degradation(ko00310);;Tropane, piperidine and pyridine alkaloid biosynthesis(ko00960);;Metabolic pathways(ko01100);;Biosynthesis of secondary metabolites(ko01110);;Biosynthesis of amino acids(ko01230)	--	--	--	--	HMDB0001263	6665-12-09	Organic compounds	Organic acids and derivatives	Carboxylic acids and derivatives	Amino acids, peptides, and analogues	137.335	1002.42	469.127	1796.03	285.826	1184.21	2377.27	2144.16	181.585	255.764	64.9613	315.947	215.896	296.338	1739.69	1972.73	176.455	1079.42	2029.04	443.148
neg_2069	Aloesin	51.3	69.9	4.77631	C19H22O9	833.255	1.54668	C08994	--	--	--	--	--	--	--	--	--	--	--	825.025	253.176	276.164	269.31	175.559	326.017	439.49	470.371	1236.94	611.962	968.689	1007.52	457.843	284.802	34.1056	367.659	859.709	658.299	512.099	384.626
neg_2071	3'-Amino-3'-deoxy-AMP	42.7	43	9.9262	C10H15N6O6P	737.163	1.56812	C07026	Metabolic pathways(ko01100);;Biosynthesis of secondary metabolites(ko01110)	--	--	--	--	--	--	--	--	--	--	256.843	360.792	79.0528	107.409	100.098	564	103.106	257.821	24.2209	126.58	204.249	599.353	1.23e-12	1307.16	25.842	1.28503	804.473	85.3833	97.5949	23.5754
neg_2076	Dobutamine	42.2	26.2	-5.49915	C18H23NO3	346.164	1.58242	C06967	--	--	--	--	--	HMDB0014979	34368-04-2	Organic compounds	Benzenoids	Phenols	Benzenediols	95.7462	392.347	414.951	678.773	179.327	665.745	1161.7	935.719	182.618	389.783	63.0599	193.794	173.508	196.029	603.87	1252.57	187.382	787.517	1128.33	434.82
neg_2079	IKarisoside A	45.2	38	-4.28596	C26H28O10	499.159	1.58242	--	--	LMPK12111710	Polyketides [PK]	Flavonoids [PK12]	Flavones and Flavonols [PK1211]	--	--	--	--	--	--	266.379	229.683	353.222	195.223	389.333	158.392	276.58	209.08	190.472	186.239	201.567	442.273	252.056	241.683	195.047	192.624	157.563	196.344	187.42	260.441
neg_208	Nitrous oxide	43.9	43	8.85981	N2O	86.9956	0.519317	C00887	Nitrogen metabolism(ko00910);;Metabolic pathways(ko01100)	--	--	--	--	HMDB0035807	10024-97-2	Inorganic compounds	Homogeneous non-metal compounds	Other non-metal organides	Other non-metal nitrides	88.954	82.4303	69.676	57.2875	83.1753	57.9837	65.2588	56.6237	82.5323	108.67	34.1058	20.5122	48.6453	52.6107	49.4095	88.1978	57.2276	87.4112	76.8586	125.225
neg_2081	4-(Aminomethyl)-5-(hydroxymethyl)-2-methylpyridin-3-ol	43.3	35.7	12.6319	C8H12N2O2	213.09	1.59672	--	--	--	--	--	--	HMDB0001431	85-87-0	Organic compounds	Organoheterocyclic compounds	Pyridines and derivatives	Pyridoxamines	84.6542	10.3229	34.1204	20.4215	18.3493	30.0414	32.7442	24.6874	72.5849	56.2407	41.6882	39.651	18.0195	41.3694	3.7812	56.8236	30.6621	34.5861	63.86	40.2057
neg_2084	Eleutheroside E	44.1	53.4	-23.5763	C34H46O18	787.249	1.60387	C20786	--	--	--	--	--	HMDB0036410	573-44-4	Organic compounds	Lignans, neolignans and related compounds	Lignan glycosides	--	439.922	184.496	192.803	154.698	80.8234	284.01	364.762	404.971	719.119	382.312	545.77	752.922	256.811	205.659	34.8057	305.237	506.295	422.392	495.961	332.375
neg_2087	D-Glucosaminate-6-phosphate	43.7	48.5	-23.3601	C6H14NO9P	310.004	1.61817	C20589	Pentose phosphate pathway(ko00030)	--	--	--	--	--	--	--	--	--	--	3408.24	3383.74	4175.41	2775.87	4416.78	1692.42	1862.84	2163.06	2320.39	2365.71	2390.42	4141.03	4769.13	2913.84	3244.47	1847.85	3743.42	1898.41	2158.11	2695.54
neg_2090	Valienone	43.3	45.2	2.52081	C7H10O5	173.046	1.62532	C17696	Metabolic pathways(ko01100);;Biosynthesis of secondary metabolites(ko01110)	--	--	--	--	--	--	--	--	--	--	19.2927	53.8638	51.8595	64.151	25.5172	42.5089	37.7282	33.1977	18.9318	38.1271	14.6407	84.5037	26.8027	92.8515	63.9077	55.4144	45.022	40.9243	55.9241	64.7636
neg_2091	(5R)-6-Hydroxy-5-isopropenyl-2-methylhexanoate	45.5	32.8	2.93675	C10H18O3	221.096	1.63245	C11406	Limonene and pinene degradation(ko00903)	--	--	--	--	--	--	--	--	--	--	1.38003	172.149	147.547	453.204	82.4927	305.824	507.877	434.358	17.2551	147.57	1.23e-12	31.9385	14.6907	57.1653	161.297	740.781	63.5866	461.023	467.854	190.938
neg_2100	Asn-Lys-OH	40.1	4.04	-1.94917	C15H20N4O7	367.125	1.63245	--	--	--	--	--	--	--	--	--	--	--	--	1276.02	695.269	927.87	907.914	490.674	1384.46	1586.24	1135.23	3348.96	4700.65	652.833	1171.69	368.718	748.868	458.699	1572.72	1217.73	4290.56	6877.18	1458.63
neg_2102	Neohesperidin Dihydrochalcone (Nhdc)	47.6	63.1	16.021	C28H36O15	611.208	1.63245	--	--	--	--	--	--	--	--	--	--	--	--	59.2696	251.594	338.823	327.39	160.744	132.142	202.495	246.678	39.7512	30.4969	114.602	318.561	205.737	90.7586	494.96	212.652	69.9904	102.362	178.971	25.64
neg_2106	Zeatin	43.8	24.4	2.30632	C10H13N5O	218.105	1.63962	C00371	Zeatin biosynthesis(ko00908);;Metabolic pathways(ko01100);;Biosynthesis of secondary metabolites(ko01110);;Plant hormone signal transduction(ko04075)	--	--	--	--	HMDB0012204	1637-39-4	Organic compounds	Organoheterocyclic compounds	Imidazopyrimidines	Purines and purine derivatives	4322.03	7415.81	6945.88	7410.79	7591.86	4995.67	4806.26	4468.11	2608.45	6466.77	5730.16	8309.04	5606.63	8229.96	3642.56	4170.77	8455.93	3820.28	4258.52	2515.76
neg_2107	Arteannuin A	43.5	35.7	-3.87299	C13H18O2	227.105	1.63962	--	--	--	--	--	--	--	--	--	--	--	--	1.23e-12	49.6771	23.8058	55.9642	1.23e-12	60.6946	215.272	112.541	1.23e-12	6.00296	1.23e-12	33.2403	1.23e-12	1.47112	15.5694	222.582	1.23e-12	113.698	184.642	49.4607
neg_2113	6-C-Glucosyl-2-Hydroxynaringenin	42.3	45	-9.96287	C21H21O11-	470.079	1.63962	--	--	--	--	--	--	--	--	--	--	--	--	183.512	466.552	537.163	414.303	465.506	152.749	189.749	168.959	53.3511	121.255	123.146	508.157	337.48	313.681	357.407	106.103	199.908	73.7468	153.038	85.2586
neg_2116	cyclo-Dopa 5-O-glucoside	42.6	61.6	45.5921	C15H19NO9	773.258	1.63962	C17751	Betalain biosynthesis(ko00965);;Metabolic pathways(ko01100);;Biosynthesis of secondary metabolites(ko01110)	--	--	--	--	HMDB0304310	--	Organic compounds	Organic oxygen compounds	Organooxygen compounds	Carbohydrates and carbohydrate conjugates	1.23e-12	212.144	139.31	279.001	115.83	40.9734	56.513	95.5264	1.23e-12	1.23e-12	1.23e-12	204.789	89.2616	1.23e-12	491.672	46.9905	1.23e-12	6.47172	46.603	1.23e-12
neg_2118	Succinate semialdehyde	40.1	24.1	18.8916	C4H6O3	101.026	1.65392	C00232	Alanine, aspartate and glutamate metabolism(ko00250);;Tyrosine metabolism(ko00350);;Butanoate metabolism(ko00650);;Vitamin B6 metabolism(ko00750);;Nicotinate and nicotinamide metabolism(ko00760);;Metabolic pathways(ko01100);;Carbon metabolism(ko01200)	--	--	--	--	HMDB0001259	692-29-5	Organic compounds	Lipids and lipid-like molecules	Fatty Acyls	Fatty acids and conjugates	6.92493	92.4591	57.7835	81.9732	72.8086	47.1902	46.6006	51.212	1.60703	2.11593	1.30304	67.1372	50.805	45.6213	96.9372	27.8466	6.00101	18.4441	32.1208	3.49386
neg_2119	Styrene	41.6	30.9	14.8686	C8H8	103.057	1.64675	C07083	Metabolic pathways(ko01100)	--	--	--	--	HMDB0034240	100-42-5	Organic compounds	Benzenoids	Benzene and substituted derivatives	Styrenes	39.9801	143.955	149.093	167.404	115.336	82.0979	101.401	102.457	25.0405	47.0632	13.54	136.249	87.8287	90.7781	168.888	76.674	47.4019	39.1597	69.7693	48.2114
neg_2120	trans-Cinnamic acid	44.6	37.1	11.3757	C9H8O2	147.047	1.64675	C00423	Ubiquinone and other terpenoid-quinone biosynthesis(ko00130);;Phenylalanine metabolism(ko00360);;Phenylpropanoid biosynthesis(ko00940);;Biosynthesis of various alkaloids(ko00996);;Biosynthesis of various plant secondary metabolites(ko00999);;Metabolic pathways(ko01100);;Biosynthesis of secondary metabolites(ko01110)	--	--	--	--	HMDB0000930	140-10-3	Organic compounds	Phenylpropanoids and polyketides	Cinnamic acids and derivatives	Cinnamic acids	1909.6	6214.52	6389.95	7069.43	4915.98	3295.79	4562.96	4246.86	1237.11	1872.65	1079.97	5914.75	3625.48	3676.71	7138.5	3154.88	2344.99	1596.66	3180.45	1990.72
neg_2125	L-Phosphinothricin	43	48.2	-24.6735	C5H12NO4P	202.021	1.65392	C04650	Phosphonate and phosphinate metabolism(ko00440);;Biosynthesis of secondary metabolites(ko01110)	--	--	--	--	--	--	--	--	--	--	29.9407	62.3248	23.3941	3.13529	30.6856	26.7908	8.91962	11.4691	92.5117	49.4136	2.92067	69.1599	4.93176	58.4889	8.21018	2.41122	25.3975	25.7739	2.89718	40.9125
neg_2126	2-Hydroxy-6-oxo-(2'-aminophenyl)-hexa-2,4-dienoate	42	21	1.0776	C12H11NO4	232.062	1.64675	C08062	Metabolic pathways(ko01100)	--	--	--	--	--	--	--	--	--	--	100.456	146.159	163.516	129.738	142.482	88.5796	97.4446	101.014	50.2757	77.2617	51.3912	157.927	141.603	115.94	145.055	80.0329	102.303	65.6255	83.3709	90.0688
neg_2128	N-lactoyl-phenylalanine	43.1	26.3	8.34739	C12H15NO4	236.095	1.65392	--	--	--	--	--	--	HMDB0062175	183241-73-8	Organic compounds	Organic acids and derivatives	Carboxylic acids and derivatives	Amino acids, peptides, and analogues	1563.69	8489.09	5245.48	7152.03	6073.57	3704.16	4276.71	4296.85	1075.05	996.97	1146.04	6027.24	4992.96	3504.11	9798.44	1965.1	1308.91	894.952	2558.42	498.702
neg_2133	3'-Hydroxy-N-methyl-(S)-coclaurine	45	35.7	4.63534	C18H21NO4	360.147	1.65392	C05202	Isoquinoline alkaloid biosynthesis(ko00950);;Metabolic pathways(ko01100);;Biosynthesis of secondary metabolites(ko01110)	--	--	--	--	HMDB0006921	--	Organic compounds	Organoheterocyclic compounds	Isoquinolines and derivatives	Benzylisoquinolines	61.6028	269.078	217.024	534.773	83.6112	397.55	708.674	495.093	76.1758	186.897	12.1514	99.5732	72.8864	115.983	307.549	829.569	69.3436	617.878	809.804	302.094
neg_2136	Isopentenyladenosine	47.6	50.2	1.3137	C15H21N5O4	380.158	1.64675	--	--	--	--	--	--	HMDB0304396	--	Organic compounds	Nucleosides, nucleotides, and analogues	Purine nucleosides	--	709.49	700.038	775.63	888.956	674.492	507.431	902.962	746.863	517.473	627.583	508.385	1628.44	456.602	591.131	800.154	671.279	604.305	588.785	812.943	614.152
neg_2137	Piceid	42.5	25.3	-1.61023	C20H22O8	389.124	1.65392	C10275	--	LMPK13090012	Polyketides [PK]	Aromatic polyketides [PK13]	Diphenyl ethers, biphenyls, dibenzyls and stilbenes [PK1309]	HMDB0030564	27208-80-6	Organic compounds	Phenylpropanoids and polyketides	Stilbenes	Stilbene glycosides	69.4689	210.883	172.672	134.39	173.643	31.6017	15.2417	24.9044	19.0818	3.47433	32.5814	186.308	208.253	37.3102	154.73	12.7863	18.0521	7.74378	24.1717	3.11467
neg_2138	S-(5'-Adenosyl)-L-methionine	44.1	54.5	0.385976	C15H22N6O5S	397.13	1.64675	--	--	--	--	--	--	HMDB0001185	485-80-3	Organic compounds	Nucleosides, nucleotides, and analogues	5'-deoxyribonucleosides	5'-deoxy-5'-thionucleosides	170.001	457.099	577.414	586.864	491.77	336.492	465.89	442.103	66.7033	152.303	42.7531	460.206	266.778	302.457	644.119	446.53	129.427	261.394	440.143	167.231
neg_2139	Theaflagallin	44.7	47.7	-17.285	C20H16O9	421.047	1.65392	--	--	--	--	--	--	HMDB0033287	102208-15-1	Organic compounds	Organoheterocyclic compounds	Benzopyrans	1-benzopyrans	230.208	436.014	533.133	348.194	528.971	109.536	147.783	200.497	150.055	134.421	107.704	488.375	522.915	268.495	477.083	56.5159	229.959	60.9305	135.052	236.325
neg_2145	Validamycin A	44.3	46	-2.60758	C20H35NO13	532.179	1.64675	C12112	Metabolic pathways(ko01100);;Biosynthesis of secondary metabolites(ko01110)	--	--	--	--	HMDB0036592	37248-47-8	Organic compounds	Organic oxygen compounds	Organooxygen compounds	Carbohydrates and carbohydrate conjugates	189.644	439.588	526.249	430.292	360.94	433.205	548.299	468.388	56.0973	92.6299	42.166	555.328	193.126	284.604	476.362	493.334	64.5328	238.372	438.656	131.46
neg_2146	gamma-L-Glutamyl-L-cysteine	40.9	30.8	-0.399817	C8H14N2O5S	545.123	1.65392	C00669	Glutathione metabolism(ko00480);;Metabolic pathways(ko01100);;Biosynthesis of cofactors(ko01240)	--	--	--	--	HMDB0001049	636-58-8	Organic compounds	Organic acids and derivatives	Carboxylic acids and derivatives	Amino acids, peptides, and analogues	671.605	3597.23	2816.41	2801.44	3103.5	1271.86	1619.87	1684.03	414.821	345.189	368.178	3236.44	2392.43	1623.03	3612.11	734.507	569.175	382.906	1054.57	215.556
neg_2148	AIDS031406	45.1	58.8	-27.5013	C27H35NO12	564.193	1.64675	--	--	--	--	--	--	--	--	--	--	--	--	122.99	1011.74	941.71	1103.5	992.327	504.099	927.203	863.245	93.3572	179.61	29.7318	644.937	498.446	349.468	1306.09	664.198	196.639	209.642	656.021	219.732
neg_2158	N-Acetyl-D-phenylalanine	51.8	78.9	10.5472	C11H13NO3	206.084	1.66105	C05620	D-Amino acid metabolism(ko00470);;Metabolic pathways(ko01100)	--	--	--	--	--	--	--	--	--	--	67.4708	294.328	179.939	202.476	180.324	125.366	147.72	155.666	48.9414	47.3249	33.9769	204.186	144.969	113.194	248.542	79.5296	60.7489	53.5013	117.137	17.1963
neg_2159	2-Acetamido-4-(D-alanylamino)-2,4,6-trideoxy-D-mannopyranose	44.6	38.4	9.31784	C11H21N3O5	274.143	1.66105	C22249	Metabolic pathways(ko01100);;Biosynthesis of nucleotide sugars(ko01250)	--	--	--	--	--	--	--	--	--	--	1.23e-12	73.0705	113.203	136.476	43.7591	168.831	336.241	268.422	30.6578	79.277	0.171852	20.6798	13.494	31.7246	210.742	302.803	27.7353	176.115	299.306	135.58
neg_2162	Turanose	40.3	41.1	1.52553	C12H22O11	363.091	1.66105	C19636	--	--	--	--	--	HMDB0011740	547-25-1	Organic compounds	Lipids and lipid-like molecules	Fatty Acyls	Fatty acyl glycosides	1053.02	379.207	1100.88	317.598	464.179	173.877	113.369	73.1413	287.869	178.776	643.337	461.758	573.182	403.425	159.456	51.3159	426.053	60.0642	41.5461	22.2809
neg_2163	3''-Oxogentamicin A2	43.8	58.6	28.8916	C17H31N3O11	488.178	1.66105	C21265	Neomycin, kanamycin and gentamicin biosynthesis(ko00524);;Biosynthesis of secondary metabolites(ko01110)	--	--	--	--	--	--	--	--	--	--	1302.93	8442.61	18322.1	9246.94	7995.52	4055.66	5191.95	5056.85	1441.72	1042.12	1142.68	8169.55	3794.98	4176.29	15632.6	2887.13	1045.15	1668.25	2954.81	1222.22
neg_2164	Nebramycin 5'	50.4	65.1	7.23384	C19H38N6O10	545.238	1.66105	C18001	Neomycin, kanamycin and gentamicin biosynthesis(ko00524);;Biosynthesis of secondary metabolites(ko01110)	--	--	--	--	--	--	--	--	--	--	66.5473	1766.59	986.124	963.363	831.773	996.478	1697.65	1385.26	2.2552	105.137	31.6891	1483.18	444.121	921.523	1241.22	1104.45	5.17206	467.599	1067.24	112.749
neg_2166	Aklavinone	47.7	56.7	-5.67182	C22H20O8	869.225	1.66105	C12424	Metabolic pathways(ko01100);;Biosynthesis of secondary metabolites(ko01110)	--	--	--	--	--	--	--	--	--	--	1.23e-12	852.411	1433.21	731.967	768.446	171.512	57.2447	142.112	1.23e-12	1.23e-12	1.23e-12	701.696	127.352	153.148	1431.84	20.4091	1.23e-12	1.23e-12	2.89125	1.23e-12
neg_2175	Senkyunolide K	40.3	44.4	35.1705	C12H16O3	415.227	1.67535	--	--	--	--	--	--	--	--	--	--	--	--	1.23e-12	23.9584	8.0409	53.5781	1.23e-12	56.5853	106.153	110.793	1.23e-12	19.0357	1.23e-12	1.23e-12	1.23e-12	3.0905	105.651	108.847	1.23e-12	86.3705	152.775	45.1528
neg_2180	Alprenolol	49.3	56.4	3.30593	C15H23NO2	270.148	1.68965	--	--	--	--	--	--	HMDB0015004	13655-52-2	Organic compounds	Benzenoids	Phenol ethers	--	9.2351	106.086	80.0929	191.571	27.9303	286.512	411.054	311.569	25.0387	135.863	1.23e-12	81.8225	75.1137	42.1656	166.486	413.207	20.1076	280.283	375.935	203.87
neg_2181	Schinifoline	45.5	44.7	-15.3126	C17H23NO	302.172	1.68965	--	--	--	--	--	--	HMDB0040380	149998-56-1	Organic compounds	Organoheterocyclic compounds	Quinolines and derivatives	Quinolones and derivatives	5.34551	413.878	614.359	934.056	224.808	778.134	1793.71	1546.01	178.362	345.443	1.37325	186.357	105.728	211.425	2675.74	1652.8	127.02	918.859	1790.9	732.775
neg_2186	N5-Citryl-D-ornithine	42.3	41.6	-31.0005	C11H18N2O8	671.208	1.70323	C22101	Metabolic pathways(ko01100);;Biosynthesis of secondary metabolites(ko01110)	--	--	--	--	--	--	--	--	--	--	159.302	64.2636	44.1968	44.4273	33.0305	79.3754	84.7095	73.8849	166.567	92.7718	186.39	144.893	62.8531	35.9488	23.0458	75.3306	196.52	112.265	89.8197	60.8459
neg_2188	Nortrachelogenin-4-O-glucoside	45.5	63.6	14.7435	C26H32O12	1131.41	1.7104	--	--	--	--	--	--	--	--	--	--	--	--	1.23e-12	819.602	112.888	64.5479	11.8658	419.637	91.0504	118.82	1.23e-12	7.12437	1.23e-12	1.23e-12	17.4643	282.937	248.29	27.835	1.23e-12	1.23e-12	13.9904	1.23e-12
neg_2194	Spegatrine	50	60.2	-3.19344	C20H25N2O2+	346.165	1.71753	--	--	--	--	--	--	--	--	--	--	--	--	136.385	256.895	260.938	462.536	104.395	511.424	948.588	694.364	170.96	263.888	16.6173	158.611	182.057	149.551	722.422	1046.04	132.226	683.546	931.726	445.048
neg_2198	Asp-Phe methyl ester	40.2	11.7	7.42666	C14H18N2O5	293.116	1.739	--	--	--	--	--	--	--	--	--	--	--	--	192.372	505.001	389.193	1138.86	165.388	1067.92	1475.54	1472.53	388.308	544.92	200.407	386.192	295.087	427.535	1144.57	2290.89	325.8	1377.84	2307.47	1097.62
neg_2200	Compactin	45	51.2	10.1945	C23H34O5	425.214	1.739	C13963	--	--	--	--	--	--	--	--	--	--	--	0.14108	0.0921536	1.23e-12	1.38383	1.23e-12	61.3433	245.31	185.924	21.395	9.51613	0.0102754	1.96044	1.23e-12	0.119725	1130.74	171.142	45.2151	15.7544	588.897	2.09509
neg_2202	Cycloheximide	49.3	65.1	-6.64483	C15H23NO4	302.136	1.7533	C06685	--	--	--	--	--	HMDB0250657	--	Organic compounds	Organoheterocyclic compounds	Piperidines	Piperidinones	1.23e-12	143.618	166.248	328.508	41.4604	328.437	722.563	550.816	132.922	174.019	6.28603	77.7593	71.8604	80.1144	962.778	943.973	130.649	661.603	852.327	368.329
neg_2213	Aspartyl-Tyrosine	45.7	40.7	8.79245	C13H16N2O6	637.205	1.77475	--	--	--	--	--	--	HMDB0028765	--	Organic compounds	Organic acids and derivatives	Carboxylic acids and derivatives	Amino acids, peptides, and analogues	315.569	59.4107	16.8509	68.1932	6.46631	141.909	159.178	123.852	133.512	81.7673	385.689	74.7651	96.0175	128.729	53.4517	141.141	309.861	143.424	137.924	72.2157
neg_2215	Traumatin	42.3	32.9	18.1956	C12H20O3	247.115	1.7819	C16309	alpha-Linolenic acid metabolism(ko00592);;Biosynthesis of secondary metabolites(ko01110)	LMFA01060093	Fatty Acyls [FA]	Fatty Acids and Conjugates [FA01]	Oxo fatty acids [FA0106]	HMDB0037326	65410-38-0	Organic compounds	Lipids and lipid-like molecules	Fatty Acyls	Fatty acids and conjugates	45.0732	306.232	244.681	708.05	128.195	335.616	731.46	612.914	100.178	302.344	1.23e-12	77.5163	46.6391	53.7337	269.618	957.67	86.6583	788.821	675.279	468.34
neg_2216	Arenarioside	41.7	36.7	-19.305	C34H44O19	755.226	1.7819	--	--	--	--	--	--	--	--	--	--	--	--	534.387	131.505	196.205	188.439	31.9234	231.57	187.643	264.715	463.746	284.488	465.65	719.323	254.367	225.001	121.037	200.406	267.498	219.287	356.737	14.1352
neg_2220	Arginyl-Isoleucine	46.7	63	-31.6621	C12H25N5O3	332.184	1.78905	--	--	--	--	--	--	HMDB0028712	62632-70-6	Organic compounds	Organic acids and derivatives	Carboxylic acids and derivatives	Amino acids, peptides, and analogues	12.0163	2122.14	1419.44	3759.53	696.407	4346.93	11118.1	8075.72	1371.08	4473.85	17.2232	731.596	809.574	866.976	8994.13	10998.2	1146.91	3511.76	6884.47	1884.96
neg_2221	2-Heptyl-4(1H)-quinolone	43.8	31.7	-7.04087	C16H21NO	288.159	1.78905	C20643	Biosynthesis of secondary metabolites(ko01110)	--	--	--	--	--	--	--	--	--	--	2.89059	965.146	1304.86	1685.64	474.925	1476.49	3596.35	2694.53	537.645	1080.58	1.23e-12	399.587	331.118	522.564	4473.77	3394.29	499.242	1637.48	3164.34	1362.2
neg_2225	Griffonilide	41.6	26	11.7831	C8H8O4	167.037	1.7962	--	--	--	--	--	--	--	--	--	--	--	--	110.813	8.63353	3.73879	8.29988	16.33	40.2539	83.3498	41.4629	428.202	215.146	75.31	23.402	25.0112	49.2673	12.3553	46.8409	141.699	87.9592	50.0676	62.5919
neg_2234	Secoisolariciresinol-9'-O-glucoside	45.8	56.8	-8.2898	C26H36O11	559.191	1.80335	--	--	--	--	--	--	--	--	--	--	--	--	504.925	1802.15	1827.86	1596.98	917.88	813.724	999.022	1045.38	408.738	389.052	732.264	2631.98	754.222	1949.12	1351.38	1147.78	298.76	970.572	999.684	517.092
neg_2238	Curcumin monoglucoside	42.4	31.7	9.63441	C27H30O11	551.159	1.81048	C17749	Stilbenoid, diarylheptanoid and gingerol biosynthesis(ko00945);;Biosynthesis of secondary metabolites(ko01110)	--	--	--	--	HMDB0304303	--	Organic compounds	Phenylpropanoids and polyketides	Flavonoids	Flavonoid glycosides	408.267	1786.67	2013.05	1040.09	661.837	106.144	110.351	171.995	291.246	248.013	317.836	2460.25	650.427	1333.2	660.62	164.068	101.851	361.83	143.703	218.06
neg_2253	Pantothenic Acid	46	40.5	8.31425	C9H17NO5	218.105	1.83195	C00864	beta-Alanine metabolism(ko00410);;Pantothenate and CoA biosynthesis(ko00770);;Metabolic pathways(ko01100);;Biosynthesis of secondary metabolites(ko01110);;Biosynthesis of cofactors(ko01240)	--	--	--	--	HMDB0000210	79-83-4	Organic compounds	Organic oxygen compounds	Organooxygen compounds	Alcohols and polyols	11226	11255.1	11136.4	9094.53	10904.6	5882.79	6792.9	6430.12	8177.53	12572.1	13708.1	18343	10339.4	16386.5	8714.28	6443.8	15720.2	8142.74	8424.23	10419.9
neg_2262	L-Alanine	54	92.8	19.1102	C3H7NO2	88.0421	1.83195	C00041	Alanine, aspartate and glutamate metabolism(ko00250);;Cysteine and methionine metabolism(ko00270);;Taurine and hypotaurine metabolism(ko00430);;Selenocompound metabolism(ko00450);;D-Amino acid metabolism(ko00470);;Carbon fixation in photosynthetic organisms(ko00710);;Aminoacyl-tRNA biosynthesis(ko00970);;Metabolic pathways(ko01100);;Biosynthesis of secondary metabolites(ko01110);;Carbon metabolis…	--	--	--	--	HMDB0000161	56-41-7	Organic compounds	Organic acids and derivatives	Carboxylic acids and derivatives	Amino acids, peptides, and analogues	126.774	139.787	131.487	97.3887	120.413	70.4812	76.3684	78.3548	95.962	135.251	142.767	200.148	128.622	185.194	86.3479	76.2326	167.451	87.2752	93.886	127.161
neg_2263	5-Oxopentanoate	43.6	40.4	17.5877	C5H8O3	115.042	1.83908	C03273	Lysine degradation(ko00310);;Metabolic pathways(ko01100)	--	--	--	--	HMDB0012233	5746-02-01	Organic compounds	Lipids and lipid-like molecules	Fatty Acyls	Fatty acids and conjugates	1.23e-12	7.95014	1.23e-12	1.23e-12	1.23e-12	78.3291	14.8173	36.7516	1.23e-12	7.94503	1.23e-12	0.0271674	1.23e-12	45.2396	1.23e-12	1.23e-12	1.23e-12	1.23e-12	33.5102	1.23e-12
neg_2265	Adenosine	45.3	51.7	-2.99224	C10H13N5O4	533.153	1.83908	C00212	Purine metabolism(ko00230);;Metabolic pathways(ko01100);;Nucleotide metabolism(ko01232);;ABC transporters(ko02010)	--	--	--	--	HMDB0000050	58-61-7	Organic compounds	Nucleosides, nucleotides, and analogues	Purine nucleosides	--	460.236	456.974	444.572	228.853	345.668	632.024	190.566	346.487	259.68	252.44	159.504	270.21	310.446	401.839	236.892	198.444	176.81	189.828	307.107	113.267
neg_2271	Etodolac	47.4	57.3	2.20287	C17H21NO3	308.127	1.85338	C06991	--	--	--	--	--	HMDB0014887	41340-25-4	Organic compounds	Organoheterocyclic compounds	Indoles and derivatives	Indolyl carboxylic acids and derivatives	1.23e-12	8.57446	7.89398	18.4153	1.23e-12	17.1163	32.3006	21.392	2.09642	2.58575	1.23e-12	1.23e-12	1.23e-12	1.23e-12	18.8815	40.4382	1.23e-12	24.7807	26.9587	20.7837
neg_2275	Byzantionoside A	44.7	66.3	-11.698	C19H30O7	391.169	1.85338	--	--	--	--	--	--	--	--	--	--	--	--	44.6819	28.0938	24.7382	63.3452	29.7499	88.1595	171.328	143.709	88.2584	42.8896	28.652	36.7452	19.8861	34.3088	155.544	177.953	52.7567	140.905	180.921	106.121
neg_2280	Methanofuran	51	86.7	-19.9105	C34H44N4O15	769.24	1.84623	C00862	Metabolic pathways(ko01100);;Biosynthesis of cofactors(ko01240)	--	--	--	--	--	--	--	--	--	--	842.276	314.715	536.446	384.089	182.357	576.953	907.816	304.917	1166.61	690.046	549.663	499.761	85.0423	1030.66	104.494	399.777	913.04	712.567	368.975	401.672
neg_2286	Leucyl-Glutamine	47.5	53.9	7.26059	C11H21N3O4	258.148	1.86768	--	--	--	--	--	--	HMDB0028927	--	Organic compounds	Organic acids and derivatives	Carboxylic acids and derivatives	Amino acids, peptides, and analogues	511.211	1854.06	2551.71	4883.28	1394.26	2434.44	8047.14	5086.18	2386.27	1524.87	389.298	1034.19	1227.4	1836.06	12306.1	7892.41	2958.03	3223.61	8567.08	2394.11
neg_2289	(-)-Glyceollin I	43.2	55.8	15.6712	C20H18O5	721.24	1.87483	C01701	Isoflavonoid biosynthesis(ko00943);;Biosynthesis of secondary metabolites(ko01110)	LMPK12070123	Polyketides [PK]	Flavonoids [PK12]	Pterocarpans [PK1207]	HMDB0033901	57103-57-8	Organic compounds	Organosulfur compounds	Thiols	Alkylthiols	1330.57	2751.32	2834.21	2383.66	1082	1426.03	1428.36	1542.92	1944.97	915.18	2490.08	6198.3	1629.16	2554.34	3864.51	1455.57	872.363	1270.59	1577.03	137.202
neg_2290	Nodakenin	41.7	43.8	-25.7981	C20H24O9	861.261	1.87483	C09279	--	--	--	--	--	--	--	--	--	--	--	5.07839	1.23e-12	1.23e-12	1.06564	1.23e-12	76.9306	17.8975	17.2122	21.9443	11.8884	1.23e-12	1.21288	1.23e-12	1.23e-12	1.23e-12	9.09877	46.08	4.17622	3.49081	1.23e-12
neg_2291	Virginiamycin S1	46.8	69.1	1.14008	C43H49N7O10	868.353	1.87483	C11269	--	--	--	--	--	HMDB0030520	11006-76-1	Organic compounds	Organic acids and derivatives	Peptidomimetics	Depsipeptides	76.8192	44.4829	83.7629	51.4123	6.0079	1394.46	2276.6	1213.24	764.148	643.839	1.23e-12	44.2491	1.23e-12	30.9614	43.4734	1062.48	333.952	1159.29	909.272	31.6482
neg_2292	5-(N-Methyl-4,5-dihydro-1H-pyrrol-2-yl)pyridin-2-ol	50.4	66.5	12.947	C10H12N2O	221.095	1.88198	C21075	Nicotinate and nicotinamide metabolism(ko00760);;Metabolic pathways(ko01100)	--	--	--	--	--	--	--	--	--	--	35.6122	354.893	320.441	718.899	168.514	458.621	822.71	750.711	132.907	343.598	7.61598	104.23	90.3257	147.926	325.537	1325.24	165.266	1012.05	1137.51	845.252
neg_2293	Chanoclavine-I	43	51.3	-42.8735	C16H20N2O	277.121	1.88198	C09131	Indole alkaloid biosynthesis(ko00901);;Metabolic pathways(ko01100);;Biosynthesis of secondary metabolites(ko01110)	--	--	--	--	--	--	--	--	--	--	487.012	635.771	1522.94	1205.5	369.221	622.686	1666.57	1075.05	753.992	334.393	177.356	298.444	577.442	355.173	2980.52	1091.34	858.921	522.958	983.108	545.707
neg_2294	Brevianamide F	45.1	44.2	-11.1645	C16H17N3O2	304.104	1.88198	C20563	Metabolic pathways(ko01100);;Biosynthesis of secondary metabolites(ko01110)	--	--	--	--	--	--	--	--	--	--	1.23e-12	74.9492	75.1536	116.383	16.7506	122.522	236.244	216.266	13.0902	77.2529	1.23e-12	30.816	1.86272	32.7307	205.679	245.918	15.7374	155.63	260.577	158.409
neg_2295	6-Lactoyl-5,6,7,8-tetrahydropterin	40.1	34.7	9.32354	C9H13N5O3	523.206	1.88198	C04244	Folate biosynthesis(ko00790);;Metabolic pathways(ko01100)	--	--	--	--	HMDB0002065	33405-80-0	Organic compounds	Organoheterocyclic compounds	Pteridines and derivatives	Pterins and derivatives	8.97677	21.586	18.2897	14.979	5.87095	148.356	165.872	171.577	6.46514	14.4715	7.98482	8.68927	4.39805	37.6049	35.1791	67.3603	3.62103	26.3073	143.627	13.2901
neg_2298	(13S,14R)-1,8-Dihydroxy-13-O-acetyl-N-methylcanadine	44.9	44.8	1.83369	C23H26NO8+	887.326	1.88198	C21589	Isoquinoline alkaloid biosynthesis(ko00950);;Metabolic pathways(ko01100);;Biosynthesis of secondary metabolites(ko01110)	--	--	--	--	--	--	--	--	--	--	50.7945	3.50833	15.0316	1.23e-12	1.23e-12	593.311	879.155	431.713	486.233	182.875	118.79	180.055	2.81627	13.2342	1.23e-12	313.626	218.858	302.706	150.312	1.23e-12
neg_2299	N6-Isopentenyladenosine	46	53.1	-1.63948	C15H21N5O4	380.157	1.88913	--	--	--	--	--	--	HMDB0304396	--	Organic compounds	Nucleosides, nucleotides, and analogues	Purine nucleosides	--	2269.85	1210.96	1536.58	2134.63	1305.41	1440.69	2714.53	1866.07	1986.79	2371.21	2429.31	3216.62	1484.2	1341.4	1774.14	2506.28	2681.32	2814.84	2532.78	1824.37
neg_2300	1,4-b-D-Xylopentaose	51.6	85.9	19.4344	C25H42O21	699.21	1.88913	--	--	--	--	--	--	--	--	--	--	--	--	137.645	54.3068	61.6538	79.0394	4.52669	509.031	422.54	371.86	1157.19	693.11	22.3941	101.402	37.5967	20.3567	128.237	234.19	407.531	387.041	243.721	47.255
neg_2306	5-Methoxytryptamine	46.2	57.2	13.0688	C11H14N2O	235.111	1.89628	C05659	Tryptophan metabolism(ko00380)	--	--	--	--	HMDB0004095	608-07-1	Organic compounds	Organoheterocyclic compounds	Indoles and derivatives	Tryptamines and derivatives	5.7395	86.6431	70.3307	184.154	42.0342	168.868	339.94	284.017	72.6365	156.991	1.23e-12	33.0735	44.2887	30.9563	308.178	299.74	62.6717	197.728	320.692	235.34
neg_2310	Premithramycin A2'	50.6	84.1	-18.8334	C33H38O15	709.126	1.89628	C12385	Metabolic pathways(ko01100);;Biosynthesis of secondary metabolites(ko01110)	--	--	--	--	--	--	--	--	--	--	7.68634	18.5305	11.9036	9.17215	4.16797	1017.41	675.84	618.352	3196.79	1766.09	5.99065	33.5526	3.0305	13.8266	25.8503	233.579	1079.37	835.797	367.809	102.647
neg_2313	Sarpagine	44.8	37.5	8.44382	C19H22N2O2	331.145	1.91058	C09239	Indole alkaloid biosynthesis(ko00901);;Biosynthesis of secondary metabolites(ko01110)	--	--	--	--	--	--	--	--	--	--	55.2252	509.245	436.093	1097.06	174.989	1310.04	2780.26	1876.48	1034.19	638.865	39.8147	177.818	216.398	360.384	1859.22	2645.56	957.828	940.73	2415.07	725.823
neg_2329	Licoflavone B	45.8	49.9	-7.02187	C25H26O4	425.15	1.93202	--	--	LMPK12110029	Polyketides [PK]	Flavonoids [PK12]	Flavones and Flavonols [PK1211]	--	--	--	--	--	--	239.47	81.7322	79.9686	96.6188	57.9761	163.131	216.171	139.555	145.37	128.65	48.899	143.823	57.3114	114.796	139.495	180.781	163.692	187.869	159.386	90.1693
neg_2331	Quetiapine	45.2	53.8	-6.39684	C21H25N3O2S	811.327	1.93202	C07397	--	--	--	--	--	HMDB0005021	111974-69-7	Organic compounds	Organoheterocyclic compounds	Benzothiazepines	Dibenzothiazepines	128.946	156.096	235.054	158.544	31.4708	1676.15	1904.38	1536.61	1099.81	895.828	38.5575	236.731	11.5206	48.4972	329.899	897.185	112.014	1055.98	1153.19	418.425
neg_2332	Phenylacetyl-L-glutamine	43.6	31.5	-4.28551	C13H16N2O4	299.079	1.93918	--	--	--	--	--	--	HMDB0006344	28047-15-6	Organic compounds	Organic acids and derivatives	Carboxylic acids and derivatives	Amino acids, peptides, and analogues	195.889	273.344	125.768	223.968	129.796	391.002	29.6924	136.407	88.0165	92.9759	69.2584	88.948	99.9316	152.535	60.7003	53.1246	92.7847	75.728	139.009	72.6669
neg_2335	N-Demethylansamitocin P-3	46.6	82.3	-6.41919	C31H41ClN2O9	641.221	1.93918	C20138	Biosynthesis of secondary metabolites(ko01110)	--	--	--	--	--	--	--	--	--	--	235.563	103.646	364.905	127.931	60.8213	96.9218	139.928	147.66	15.5296	15.7655	77.8375	59.3423	82.4429	28.0198	83.7156	123.438	13.3007	71.0321	124.223	48.537
neg_2337	Vibriobactin	40.1	33.1	1.32393	C35H39N5O11	740.235	1.93918	C06769	Biosynthesis of secondary metabolites(ko01110)	--	--	--	--	--	--	--	--	--	--	564.876	197.79	415.74	250.804	164.689	650.316	883.721	596.278	1019.34	560.919	148.054	510.466	62.9162	313.858	204.063	492.122	432.71	671.761	416.691	108.782
neg_2341	Threoninyl-Isoleucine	46.8	48.7	9.79868	C10H20N2O4	231.137	1.94633	--	--	--	--	--	--	HMDB0029064	129050-49-3	Organic compounds	Organic acids and derivatives	Carboxylic acids and derivatives	Amino acids, peptides, and analogues	264.754	1041.25	1195.09	1840.62	694.579	934.512	2053.64	1298.62	392.107	608.171	159.236	515.36	394.166	465.55	1330.22	2172.33	565.557	1205.61	1818.24	608.61
neg_2343	N-Succinyl-LL-2,6-diaminoheptanedioate	48.8	50.5	2.31491	C11H18N2O7	311.087	1.95347	C04421	Lysine biosynthesis(ko00300);;Metabolic pathways(ko01100);;Biosynthesis of amino acids(ko01230)	--	--	--	--	HMDB0012267	26605-36-7	Organic compounds	Organic acids and derivatives	Carboxylic acids and derivatives	Amino acids, peptides, and analogues	524.269	405.82	602.585	531.592	538.984	481.847	705.223	402.119	720.264	420.571	457.241	537.817	231.893	471.171	317.156	383.587	436.309	396.156	368.076	607.562
neg_2344	Triamcinolone Diacetate	50.7	69.7	-7.17069	C25H31FO8	499.172	1.95347	C08184	--	--	--	--	--	HMDB0014758	124-94-7	Organic compounds	Lipids and lipid-like molecules	Steroids and steroid derivatives	Hydroxysteroids	275.405	189.225	262.104	249.834	93.2644	213.657	363.606	200.177	205.513	278.561	191.133	287.126	37.1221	215.572	293.978	235.34	174.918	173.874	217.121	150.803
neg_2348	Oxytetracycline	52.4	80.8	0.901068	C22H24N2O9	979.311	1.94633	C06624	Metabolic pathways(ko01100);;Biosynthesis of secondary metabolites(ko01110)	LMPK07000005	Polyketides [PK]	Linear tetracyclines [PK07]	--	HMDB0014733	79-57-2	Organic compounds	Phenylpropanoids and polyketides	Tetracyclines	--	1.23e-12	3.31535	4.55595	15.9771	3.62599	561.984	439.244	445.608	909.987	853.068	1.23e-12	3.18992	1.23e-12	9.11565	1.23e-12	91.9267	237.289	283.463	230.807	1.23e-12
neg_2350	2-Hydroxyphenylacetic acid	40.9	21.1	11.8322	C8H8O3	151.042	1.96063	C05852	Phenylalanine metabolism(ko00360);;Metabolic pathways(ko01100)	--	--	--	--	HMDB0000669	614-75-5	Organic compounds	Benzenoids	Benzene and substituted derivatives	Phenylacetic acids	11.9875	50.1118	39.819	2.14719	27.7747	14.3244	1.17369	8.28326	1.23e-12	8.69816	119.937	96.2152	4.61724	187.92	13.7763	1.23e-12	101.445	8.29637	17.7162	3.57093
neg_2351	Gentisic acid	41.6	24.3	11.782	C7H6O4	153.021	1.96063	C00628	Tyrosine metabolism(ko00350);;Metabolic pathways(ko01100)	--	--	--	--	HMDB0000152	490-79-9	Organic compounds	Benzenoids	Benzene and substituted derivatives	Benzoic acids and derivatives	856.945	273.677	347.029	206.28	441.659	225.928	322.293	224.383	825.797	543.916	444.695	367.541	761.172	367.899	282.817	308.37	816.643	522.407	219.961	500.959
neg_2357	Dihydropinosylvin methyl ether	45.5	40.9	-5.14151	C15H16O2	227.107	1.97495	--	--	--	--	--	--	--	--	--	--	--	--	100.21	400.203	318.727	686.535	244.33	482.043	753.429	563.235	68.1504	271.837	87.8656	351.813	147.702	223.701	210.583	1364.05	224.583	1091.08	1157.79	720.543
neg_2363	Gibberellin A24	41.2	67.9	29.2405	C20H26O5	345.181	1.96777	C11861	Diterpenoid biosynthesis(ko00904);;Metabolic pathways(ko01100);;Biosynthesis of secondary metabolites(ko01110)	LMPR0104170018	Prenol Lipids [PR]	Isoprenoids [PR01]	C20 isoprenoids (diterpenes) [PR0104]	HMDB0303459	--	Organic compounds	Lipids and lipid-like molecules	Prenol lipids	Diterpenoids	241.563	1180.54	1600.82	2285.63	631.336	1917.34	3938.26	3007.28	1079.06	1500.38	339.755	733.068	417.162	958.532	6707.92	4038.78	924.135	2744.94	4495.38	2565.53
neg_2372	N6-Acetyl-LL-2,6-diaminoheptanedioate	48.8	51	1.05544	C9H16N2O5	267.076	1.9821	C04390	Lysine biosynthesis(ko00300);;Metabolic pathways(ko01100);;Biosynthesis of secondary metabolites(ko01110);;Biosynthesis of amino acids(ko01230)	--	--	--	--	--	--	--	--	--	--	2.23218	21.1235	15.58	2.90456	0.0635439	69.5617	2.42361	26.9558	1.23e-12	1.19292	7.20709	24.9257	1.23e-12	32.0833	0.0217731	26.1216	9.27883	13.2657	58.6749	40.1174
neg_2378	Gamma-Glu-Leu	45.6	41	10.1706	C11H20N2O5	259.133	1.98925	--	--	--	--	--	--	HMDB0011171	2566-39-4	Organic compounds	Organic acids and derivatives	Carboxylic acids and derivatives	Amino acids, peptides, and analogues	383.075	1543.59	1340.74	2538.12	766.28	1672.95	3159.16	2215.88	508.015	1157.39	258.465	919.778	675.845	835.267	1636.49	4173	727.47	3077.84	4239.89	1786.28
neg_2379	γ-Glu-Phe	45	40.4	-5.18404	C14H18N2O5	329.089	1.98925	--	--	--	--	--	--	HMDB0000594	7432-24-8	Organic compounds	Organic acids and derivatives	Carboxylic acids and derivatives	Amino acids, peptides, and analogues	196.545	135.147	40.6144	83.5766	41.7467	932.091	274.743	705.361	50.8543	420.247	303.992	143.63	42.304	240.987	2.88119	155.796	376.87	171.06	1370.97	227.699
neg_2381	Phellamurin	46.3	60.2	-15.2662	C26H30O11	563.163	1.98925	C09808	--	--	--	--	--	HMDB0031876	117861-55-9	Organic compounds	Lipids and lipid-like molecules	Fatty Acyls	Fatty acyl glycosides	536.014	2686.98	704.031	2196.76	2531.13	650.459	655.727	571.95	896.866	519.254	263.61	586.879	343.879	708.756	456.788	806.609	883.125	521.259	858.851	547.545
neg_2383	Leukotriene B4	50.7	84.1	19.1342	C20H32O4	381.235	10.0014	C02165	Arachidonic acid metabolism(ko00590);;Metabolic pathways(ko01100)	LMFA03020001	Fatty Acyls [FA]	Eicosanoids [FA03]	Leukotrienes [FA0302]	HMDB0001085	71160-24-2	Organic compounds	Lipids and lipid-like molecules	Fatty Acyls	Eicosanoids	6855.51	3380.93	4325.03	3700.03	6030.12	4050.69	2760.44	3391.53	6553.07	4908.88	5696.62	4412.97	5623.13	4177.57	4645.18	2800.56	8500.71	3766.64	3092.63	4680.2
neg_2387	Coumalic acid	40.2	10.9	2.10417	C6H4O4	139.004	10.0228	--	--	--	--	--	--	--	--	--	--	--	--	79.1391	50.0296	60.1985	45.7468	68.1939	38.6005	37.2459	39.8754	80.1262	63.7762	81.6878	61.2127	80.1386	54.2295	64.9215	46.5237	85.3759	46.7872	43.4066	62.9475
neg_2388	Oleyl alcohol	45	35.4	6.58426	C18H36O	313.277	10.0228	--	--	LMFA05000684	Fatty Acyls [FA]	Fatty alcohols [FA05]	--	HMDB0029632	143-28-2	Organic compounds	Lipids and lipid-like molecules	Fatty Acyls	Fatty alcohols	766.522	342.981	618.261	410.12	629.139	409.572	404.409	447.364	1379.1	949.774	2175.76	923.967	1063.51	674.006	410.452	391.297	2304.73	672.571	291.485	231.99
neg_2396	7,8-Dihydro-.alpha.-ionone	47.3	44.4	3.83609	C13H22O	433.334	10.0586	--	--	--	--	--	--	--	--	--	--	--	--	282.209	144.407	173.472	127.522	217.671	100.635	99.956	112.075	207.754	168.767	269.246	158.419	216.579	152.452	181.788	124.615	287.673	138.731	118.296	158.329
neg_2418	Cinobufotalin	45.3	45.5	12.1954	C26H34O7	457.229	10.0864	C16932	--	LMST01130034	Sterol Lipids [ST]	Sterols [ST01]	Bufanolides and derivatives [ST0113]	HMDB0250267	--	Organic compounds	Lipids and lipid-like molecules	Steroids and steroid derivatives	Steroid lactones	218.997	195.499	217.641	264.205	246.154	172.709	166.358	146.005	243.439	247.439	317.632	129.049	231.82	152.465	131.958	254.516	676.864	150.654	93.9953	122.115
neg_2438	13Z-Docosenamide	45.3	44.1	5.92677	C22H43NO	382.335	10.1079	--	--	LMFA08010028	Fatty Acyls [FA]	Fatty amides [FA08]	Primary amides [FA0801]	--	--	--	--	--	--	23.8668	63.4767	195.771	57.6945	137.27	48.0953	31.5458	48.1606	37.1774	50.1594	129.429	192.268	224.586	174.173	320.279	132.673	283.61	69.8593	154.445	31.6812
neg_2442	Itaconate	40.5	27	23.1459	C5H6O4	151.004	10.1222	C00490	C5-Branched dibasic acid metabolism(ko00660);;Metabolic pathways(ko01100)	--	--	--	--	HMDB0002092	97-65-4	Organic compounds	Lipids and lipid-like molecules	Fatty Acyls	Fatty acids and conjugates	186.65	109.396	141.246	104.567	155.81	83.2664	89.4024	87.027	155.023	131.846	182.875	131.327	183.661	111.981	122.174	91.6589	200.375	107.882	87.7161	132.301
neg_2466	(25R)-Spirost-4-ene-3,12-dione	47.9	75.2	-24.4634	C27H38O4	425.259	10.1651	--	--	--	--	--	--	--	--	--	--	--	--	1688	809.263	1031.89	829.226	1521.28	1004.16	583.446	776.596	1976.95	933.086	1222.21	1049.42	1156.92	974.05	1250.59	663.238	1978.14	754.274	617.385	1162.36
neg_2506	14-Demethyllanosterol	48	63.3	-2.12259	C29H48O	411.362	10.2866	C05108	Steroid biosynthesis(ko00100);;Metabolic pathways(ko01100);;Biosynthesis of secondary metabolites(ko01110)	LMST01010176	Sterol Lipids [ST]	Sterols [ST01]	Cholesterol and derivatives [ST0101]	HMDB0304021	--	Organic compounds	Lipids and lipid-like molecules	Steroids and steroid derivatives	Cholestane steroids	256.206	130.922	154.692	113.176	175.878	112.874	103.564	141.779	209.142	160.433	207.994	145.693	246.933	113.91	132.465	102.847	215.803	140.733	90.9449	139.944
neg_2508	24-Methylenelophenol	49.6	77.4	21.5783	C29H48O	447.349	10.3009	C11522	Steroid biosynthesis(ko00100);;Metabolic pathways(ko01100);;Biosynthesis of secondary metabolites(ko01110)	--	--	--	--	HMDB0006846	1176-52-9	Organic compounds	Lipids and lipid-like molecules	Steroids and steroid derivatives	Ergostane steroids	1587.69	1394.34	983.231	641.794	614.289	253.493	291.778	615.197	747.561	334.598	976.909	419.507	1039.78	1371.39	900.733	103.718	572.565	435.603	71.3829	164.012
neg_2524	.delta.-Tocopherol	48.6	59.1	8.54043	C27H46O2	423.328	10.3438	--	--	--	--	--	--	--	--	--	--	--	--	445.195	272.666	311.956	203.978	372.345	154.347	157.199	216.676	370.648	279.262	368.357	276.822	395.973	241.066	301.96	183.32	411.245	199.586	222.721	344.819
neg_2530	13,14-dihydro-15-keto-PGF2alpha	46.4	64.1	26.8235	C20H34O5	753.498	10.3367	--	--	LMFA03010027	Fatty Acyls [FA]	Eicosanoids [FA03]	Prostaglandins [FA0301]	HMDB0004685	27376-76-7	Organic compounds	Lipids and lipid-like molecules	Fatty Acyls	Eicosanoids	15.177	5.00419	11.9478	11.474	29.3041	7.58958	15.964	4.15831	3.79718	12.2063	13.4678	5.309	3.99749	9.16132	15.7893	7.72017	26.8064	10.6424	3.03479	7.7911
neg_2607	1,2-Dihydrovomilenine	40.6	17	6.61296	C21H24N2O3	703.355	10.479	C11808	Indole alkaloid biosynthesis(ko00901);;Biosynthesis of secondary metabolites(ko01110)	--	--	--	--	--	--	--	--	--	--	0.0551531	4.76195	0.125869	10.8671	0.0596067	59.8743	1.1065	4.05869	0.576061	0.0741033	0.12777	0.122118	0.353108	0.693092	0.187686	8.31639	0.00111825	0.114324	2.93341	0.121962
neg_2609	Verapamil	45.6	54.9	-17.0476	C27H38N2O4	967.565	10.479	C07188	--	--	--	--	--	HMDB0001850	52-53-9	Organic compounds	Benzenoids	Benzene and substituted derivatives	Phenylbutylamines	86.2487	42.9458	49.4586	31.4409	77.9996	35.9601	43.5754	30.5764	52.2571	59.8787	31.8764	55.7177	59.8303	49.7787	60.0472	40.8965	117.112	40.6575	30.1376	21.6902
neg_2613	4-Methylthio-2-oxobutanoic acid	41.2	18.9	3.99496	C5H8O3S	168.995	10.4933	C01180	Cysteine and methionine metabolism(ko00270);;D-Amino acid metabolism(ko00470);;Glucosinolate biosynthesis(ko00966);;Metabolic pathways(ko01100);;Biosynthesis of secondary metabolites(ko01110);;2-Oxocarboxylic acid metabolism(ko01210)	LMFA01060170	Fatty Acyls [FA]	Fatty Acids and Conjugates [FA01]	Oxo fatty acids [FA0106]	HMDB0001553	583-92-6	Organic compounds	Lipids and lipid-like molecules	Fatty Acyls	Fatty acids and conjugates	1604.88	986.737	1217.27	933.152	1354.22	688.465	707.308	795.972	1409.3	1099.67	1564.71	1137.01	1508.09	1019.13	1152	775.278	1696.69	898.959	827.33	1220.73
neg_2615	12-Hydroxyabietic Acid	42.8	43.9	27.1081	C20H30O3	635.449	10.4933	--	--	--	--	--	--	--	--	--	--	--	--	302.929	451.289	815.683	653.33	886.226	190.234	176.779	190.075	252.318	215.954	1485.5	399.471	900.879	623.163	356.268	480.434	1002.49	332.57	191.089	195.327
neg_2619	Isoleucyl-Lysine	45.6	47.9	-7.57489	C12H25N3O3	577.389	10.5004	--	--	--	--	--	--	HMDB0028912	--	Organic compounds	Organic acids and derivatives	Carboxylic acids and derivatives	Amino acids, peptides, and analogues	1.23e-12	21.9804	63.0129	7.5419	249.383	10.2424	45.5508	9.20953	98.7917	58.734	146.642	32.4252	11.1301	19.7612	86.6621	112.327	233.72	40.6805	10.1992	17.2161
neg_2623	Capsorubin	43.8	48.7	10.3817	C40H56O4	599.417	10.5076	C08585	Carotenoid biosynthesis(ko00906);;Biosynthesis of secondary metabolites(ko01110)	LMPR01070048	Prenol Lipids [PR]	Isoprenoids [PR01]	C40 isoprenoids (tetraterpenes) [PR0107]	HMDB0036924	470-38-2	Organic compounds	Lipids and lipid-like molecules	Prenol lipids	Triterpenoids	1.23e-12	8.32473	4.9604	0.093973	0.127675	74.3308	0.00955152	5.93031	22.6625	39.6704	16.4679	3.62605	1.23e-12	39.9324	1.23e-12	0.0332093	81.2386	5.9602	1.23e-12	1.23e-12
neg_2626	4,4'-Diapolycopenedial	50.9	87.6	29.9892	C30H36O2	473.283	10.5219	C19798	Carotenoid biosynthesis(ko00906);;Biosynthesis of secondary metabolites(ko01110)	LMPR0106010053	Prenol Lipids [PR]	Isoprenoids [PR01]	C30 isoprenoids (triterpenes) [PR0106]	--	--	--	--	--	--	293447	173426	216494	164122	236453	126903	128471	144455	249459	208445	285476	201454	276985	188839	204984	138197	319290	156015	147788	221405
neg_2631	Andrograpanin	43.8	55.9	40.2933	C20H30O3	681.463	10.529	--	--	--	--	--	--	--	--	--	--	--	--	380.181	423.66	391.754	338.09	333.498	148.159	89.5831	207.776	319.292	190.437	276.849	248.169	224.922	341.284	240.774	157.09	266.264	161.559	164.07	215.069
neg_2632	Neoruscogenin	45.9	47	-4.96958	C27H40O4	915.595	10.529	--	--	--	--	--	--	--	--	--	--	--	--	530.771	665.175	678.64	839.339	641.167	231.764	287.372	378.576	690.115	217.927	440.66	713.228	680.794	247.4	168.418	426.644	706.625	657.893	320.774	848.42
neg_2638	Rhodovibrin	47.9	59.7	7.79283	C41H60O2	605.439	10.5433	C15878	Carotenoid biosynthesis(ko00906);;Metabolic pathways(ko01100);;Biosynthesis of secondary metabolites(ko01110)	LMPR01070136	Prenol Lipids [PR]	Isoprenoids [PR01]	C40 isoprenoids (tetraterpenes) [PR0107]	--	--	--	--	--	--	544.746	1078.58	759.552	1074.31	807.724	373.748	386.844	435.638	286.859	462.054	814.936	578.08	715.586	786.806	937.135	725.779	682.101	721.784	350.15	199.797
neg_2651	Diethyl decanedioate	45.1	54.8	-11.1084	C14H26O4	575.374	10.5791	--	--	--	--	--	--	HMDB0040429	110-40-7	Organic compounds	Lipids and lipid-like molecules	Fatty Acyls	Fatty acid esters	124.954	180.094	357.23	167.388	991.595	188.335	209.294	172.782	448.336	308.517	726.875	237.936	259.486	214.513	562.709	446.317	837.759	212.552	151.634	148.306
neg_2656	Alisol A 24-acetate	45.1	57.8	1.42121	C32H52O6	531.37	10.5934	--	--	--	--	--	--	HMDB0260413	--	Organic compounds	Lipids and lipid-like molecules	Prenol lipids	Triterpenoids	1.23e-12	4.2017	1.62132	1.23e-12	3.04737	2.15413	0.826457	1.23e-12	13.9731	4.88498	1.23e-12	1.23e-12	1.23e-12	1.23e-12	1.23e-12	1.23e-12	1.56392	1.23e-12	1.23e-12	1.92851
neg_2659	(15S)-15-Hydroxy-5,8,11-cis-13-trans-eicosatetraenoate	46.6	62.9	16.4736	C20H32O3	365.239	10.6005	C04742	Arachidonic acid metabolism(ko00590);;Metabolic pathways(ko01100)	--	--	--	--	HMDB0003876	54845-95-3	Organic compounds	Lipids and lipid-like molecules	Fatty Acyls	Eicosanoids	588.395	281.224	388.865	279.387	494.457	368.327	216.805	289.584	481.222	320.773	460.894	357.359	416.327	345.756	441.151	229.312	646.155	266.443	245.97	399.206
neg_2670	3,4-Dihydroanhydrorhodovibrin	45.1	48.2	8.73701	C41H60O	589.444	10.6577	C15886	Carotenoid biosynthesis(ko00906);;Metabolic pathways(ko01100);;Biosynthesis of secondary metabolites(ko01110)	--	--	--	--	--	--	--	--	--	--	743.647	3776.87	1682.22	4538.81	1682.7	1032.22	710.879	1076.07	658.409	1904.65	960.444	639.899	730.778	1453.15	611.993	1937.65	1230.74	1587.36	254.643	435.855
neg_2696	ent-2alpha,3alpha-Dihydroxyisokaurene	46.6	59.3	-9.76222	C20H32O2	653.473	10.7785	C21831	Diterpenoid biosynthesis(ko00904);;Biosynthesis of secondary metabolites(ko01110)	--	--	--	--	--	--	--	--	--	--	968.406	492.462	766.125	546.103	745.951	454.447	491.506	431.995	726.251	312.914	1320.27	563.646	915.072	585.452	648.832	633.052	1169.48	656.931	506.377	432.393
neg_2703	beta-Alanyl-L-arginine	48.7	78.2	34.2102	C9H19N5O3	535.313	10.8	C05340	beta-Alanine metabolism(ko00410);;Metabolic pathways(ko01100)	--	--	--	--	HMDB0060441	--	Organic compounds	Organic acids and derivatives	Peptidomimetics	Hybrid peptides	635.858	449.583	679.951	217.484	897.535	1.23e-12	1.23e-12	1.23e-12	4.88387	1.23e-12	1318.65	197.869	933.36	553.817	1114.45	1.23e-12	5.76184	1.23e-12	4.45431	1.61763
neg_2705	2,3-Bis-O-(geranylgeranyl)-sn-glycero-1-phospho-L-serine	40.5	46.5	0.891128	C46H78NO8P	838.517	10.8	--	--	--	--	--	--	--	--	--	--	--	--	1633.63	1289.54	1663.55	906.381	2532.13	384.17	494.252	390.201	707.74	918.435	2016.93	983.551	1828.54	1348.55	1708.59	632.037	1229.68	378.803	669.815	1030.85
neg_2708	3,6-Dioxo-16-hydroxylanosta-7,24-diene-21-oic acid γ-lactone (Sendanolactone)	40.1	29.8	-22.284	C30H42O4	977.594	10.8214	--	--	--	--	--	--	--	--	--	--	--	--	112.38	102.427	36.63	122.788	115.274	115.003	96.804	79.7056	51.7613	2.07163	96.3813	45.5708	112.204	35.265	12.5487	109.395	82.7732	91.6178	64.2297	7.55942
neg_2710	Lovastatin acid	48.5	69	15.6397	C24H38O6	443.248	10.8429	C21130	Metabolic pathways(ko01100);;Biosynthesis of secondary metabolites(ko01110)	--	--	--	--	HMDB0254177	--	Organic compounds	Organic acids and derivatives	Hydroxy acids and derivatives	Medium-chain hydroxy acids and derivatives	1222.28	774.854	917.591	943.378	927.827	1095.08	981.933	1032.15	1307.28	1542.34	1014.1	752.441	1151.18	862.194	1147.61	1144.4	2825.12	1234.71	832.841	1111.03
neg_273	Acetyl phosphate	49.6	58.1	7.3591	C2H5O5P	174.958	0.526483	C00227	Taurine and hypotaurine metabolism(ko00430);;Pyruvate metabolism(ko00620);;Metabolic pathways(ko01100);;Carbon metabolism(ko01200)	--	--	--	--	HMDB0001494	590-54-5	Organic compounds	Organic acids and derivatives	Organic phosphoric acids and derivatives	Phosphate esters	658.163	284.761	474.157	240.509	810.014	219.648	212.818	426.794	582.339	361.209	706.499	520.348	958.97	248.207	1155.88	164.919	614.417	169.374	361.402	381.441
neg_2730	LysoPC 15:1	40.3	20.4	12.056	C23H46NO7P	1003.61	10.9072	--	--	--	--	--	--	--	--	--	--	--	--	25.3847	15.1066	26.3184	57.8427	10.7663	30.6283	51.5981	27.2716	1.43591	1.23e-12	21.268	1.23e-12	16.8519	1.81801	1.23e-12	51.3138	1.23e-12	19.2855	2.78689	1.23e-12
neg_2734	9-OxoOTrE	43.5	30	6.64014	C18H28O3	291.199	10.943	--	--	--	--	--	--	--	--	--	--	--	--	70.2681	856.809	261.325	1373.58	311.035	152.039	58.2533	112.843	64.9787	544.918	76.0468	63.2469	108.684	105.591	57.3789	407.852	80.2907	412.401	45.9347	78.3937
neg_2736	3,4-Dihydrospheroidene	40.5	28.7	12.3073	C41H62O	591.462	10.943	C15895	Carotenoid biosynthesis(ko00906);;Metabolic pathways(ko01100);;Biosynthesis of secondary metabolites(ko01110)	--	--	--	--	--	--	--	--	--	--	1269.4	15684.7	5966.86	22559.5	7580.1	1813.15	1086.4	1670.99	1130.42	7711.42	3550.62	1566.8	3110.68	3873.87	2007.89	7508.74	2508.58	5926.09	596.685	913.225
neg_2742	Polyphyllin VI	46.8	69.1	-20.3111	C39H62O13	759.379	10.9358	--	--	--	--	--	--	--	--	--	--	--	--	6.10573	258.806	45.1852	390.091	62.9541	20.8026	1.23e-12	24.011	21.1797	129.044	1.88997	21.2673	26.6789	24.2426	9.62191	145.817	4.79439	124.176	12.2834	8.76126
neg_2751	TAXUSIN	46.7	57.8	8.21968	C28H40O8	1067.57	10.9716	C20152	--	--	--	--	--	--	--	--	--	--	--	1.85888	9.46408	6.68887	17.0457	4.22891	44.4935	22.0802	23.0588	4.88485	8.03201	18.9285	7.97023	1.23e-12	10.6043	3.058	21.175	5.0929	2.63905	4.11424	3.63991
neg_2761	Cycloeucalenone	48.5	48.9	2.29663	C30H48O	469.37	11.0073	C22121	Steroid biosynthesis(ko00100);;Metabolic pathways(ko01100);;Biosynthesis of secondary metabolites(ko01110)	--	--	--	--	HMDB0030507	1255-12-5	Organic compounds	Lipids and lipid-like molecules	Steroids and steroid derivatives	Cycloartanols and derivatives	322.188	91.6011	128.583	66.3671	263.258	143.01	131.737	86.4405	441.722	245.826	739.629	241.234	175.072	396.551	83.7853	97.2618	521.342	94.5262	53.8958	38.2801
neg_2768	(-)-Perillyl alcohol	42.4	39.2	17.0611	C10H16O	349.244	11.0502	C02452	Monoterpenoid biosynthesis(ko00902);;Limonene and pinene degradation(ko00903);;Biosynthesis of secondary metabolites(ko01110)	LMPR0102090008	Prenol Lipids [PR]	Isoprenoids [PR01]	C10 isoprenoids (monoterpenes) [PR0102]	HMDB0003634	536-59-4	Organic compounds	Lipids and lipid-like molecules	Prenol lipids	Monoterpenoids	156.188	92.6538	80.9686	87.3285	138.414	72.4309	62.1036	48.0572	153.141	70.3148	152.865	103.716	122.674	103.065	95.5668	75.7177	177.847	76.8113	70.7348	74.904
neg_2774	2-Hydroxy-2,4-pentadienoate	42.4	15.3	1.32509	C5H6O3	149.001	11.0788	C00596	Phenylalanine metabolism(ko00360);;Metabolic pathways(ko01100)	--	--	--	--	--	--	--	--	--	--	84.5123	45.6852	57.5178	37.8639	65.0731	33.2185	35.3464	38.8072	58.2995	46.12	73.1655	54.7628	68.4318	46.5823	53.2696	39.7658	84.4807	44.7051	33.563	53.7496
neg_2777	(2'S)-Deoxymyxol 2'-(2,4-di-O-methyl-alpha-L-fucoside)	48.9	75.6	-21.6673	C48H70O6	777.471	11.0924	C15935	Carotenoid biosynthesis(ko00906)	LMPR01070543	Prenol Lipids [PR]	Isoprenoids [PR01]	C40 isoprenoids (tetraterpenes) [PR0107]	--	--	--	--	--	--	9462.71	2542.37	3448.85	6519.18	9035.4	2774.1	4422.07	1916.81	4387.98	8784.24	6103.45	4363.85	5928.17	11555.7	8891.44	3651.1	8573.52	3843.8	2158.01	8955.45
neg_2782	Dodecanoic acid (Lauric acid)	41.5	14.5	4.83752	C12H24O2	399.35	11.121	--	--	--	--	--	--	--	--	--	--	--	--	289.303	60.0743	70.0558	38.4944	64.3471	51.1243	30.6853	7.63207	610.77	181.009	403.54	134.264	76.4167	65.5645	1.23e-12	20.2359	376.395	47.649	4.67351	10.5337
neg_2794	Vitamin D3	45.7	56.4	1.84601	C27H44O	429.338	11.1782	C05443	Steroid biosynthesis(ko00100);;Metabolic pathways(ko01100);;Biosynthesis of secondary metabolites(ko01110)	LMST03020001	Sterol Lipids [ST]	Secosteroids [ST03]	Vitamin D3 and derivatives [ST0302]	HMDB0000876	67-97-0	Organic compounds	Lipids and lipid-like molecules	Steroids and steroid derivatives	Vitamin D and derivatives	30.9934	20.6681	11.3038	3.60466	16.5265	2.56044	1.23e-12	9.29153	1.23e-12	1.23e-12	1.27151	1.23e-12	1.23e-12	9.32351	12.3454	1.23e-12	1.23e-12	1.23e-12	1.23e-12	1.23e-12
neg_280	N4-acetyl-2'-O-methylcytidine	46	50.3	5.10979	C12H17N3O6	344.111	0.533617	--	--	--	--	--	--	--	--	--	--	--	--	57.3333	10.6985	23.2283	19.9145	12.9332	4.44587	7.01781	9.56825	11.2818	7.26929	20.9005	13.8447	55.5536	10.2673	8.5853	9.45024	12.9615	25.0878	13.4343	16.4879
neg_2805	Stearic acid	42	34.2	-5.04101	C18H36O2	627.554	11.2211	C01530	Fatty acid biosynthesis(ko00061);;Biosynthesis of unsaturated fatty acids(ko01040);;Metabolic pathways(ko01100)	LMFA01010018	Fatty Acyls [FA]	Fatty Acids and Conjugates [FA01]	Straight chain fatty acids [FA0101]	HMDB0000827	1957-11-04	Organic compounds	Lipids and lipid-like molecules	Fatty Acyls	Fatty acids and conjugates	112.63	10.9567	56.0628	25.4157	18.6686	21.2159	33.0936	37.0255	45.8032	21.5642	52.1694	36.1044	74.0602	24.6289	41.5541	23.7073	63.3883	15.1277	28.6302	53.1756
neg_285	4-Amino-anhydrotetracycline	42	43.8	-11.4221	C20H18N2O7	443.105	0.533617	C06654	Metabolic pathways(ko01100);;Biosynthesis of secondary metabolites(ko01110)	--	--	--	--	--	--	--	--	--	--	86.7116	74.4128	45.9641	47.1952	56.553	80.9936	57.8863	74.9605	58.5507	55.4891	32.3678	22.6069	58.441	53.0791	57.706	69.4036	60.796	63.8664	99.0275	61.6847
neg_291	8-Methylsulfinyl-3-oxooctyl glucosinolate	42.4	60.9	-1.7023	C16H29NO11S3	528.064	0.533617	--	--	--	--	--	--	--	--	--	--	--	--	46.2446	67.7534	72.8286	61.1529	53.8993	77.3736	70.3756	75.6132	28.4873	55.8451	15.667	6.57809	48.382	45.0959	66.4909	93.1707	35.5637	90.76	101.808	104.919
neg_3084	Fumarate	40.3	7.68	0.753973	C4H4O4	136.986	11.3212	C00122	Citrate cycle (TCA cycle)(ko00020);;Oxidative phosphorylation(ko00190);;Arginine biosynthesis(ko00220);;Alanine, aspartate and glutamate metabolism(ko00250);;Tyrosine metabolism(ko00350);;Phenylalanine metabolism(ko00360);;Pyruvate metabolism(ko00620);;Butanoate metabolism(ko00650);;Nicotinate and nicotinamide metabolism(ko00760);;Metabolic pathways(ko01100);;Biosynthesis of secondary metabolites…	--	--	--	--	HMDB0000131	56-81-5	Organic compounds	Organic oxygen compounds	Organooxygen compounds	Carbohydrates and carbohydrate conjugates	508.39	320.365	373.761	265.717	451.614	284.655	302.048	353.406	649.009	449.299	476.499	392.1	449.049	318.035	334.938	314.568	733.382	416.245	374.472	558.01
neg_3096	2-Phosphoglycolate	43.7	30.1	7.3403	C2H5O6P	154.976	11.3713	C00988	Glyoxylate and dicarboxylate metabolism(ko00630);;Metabolic pathways(ko01100);;Biosynthesis of secondary metabolites(ko01110);;Carbon metabolism(ko01200)	--	--	--	--	HMDB0000816	13147-57-4	Organic compounds	Organic acids and derivatives	Organic phosphoric acids and derivatives	Phosphate esters	688.458	394.466	489.918	369.883	603.437	343.518	357.982	413.054	702.2	515.548	668.352	479.757	627.343	419.71	473.262	388.823	914.097	442.522	412.524	583.757
neg_3097	Oxaloacetate	46.5	40.8	2.6442	C4H4O5	152.981	11.3856	C00036	Glycolysis / Gluconeogenesis(ko00010);;Citrate cycle (TCA cycle)(ko00020);;Alanine, aspartate and glutamate metabolism(ko00250);;D-Amino acid metabolism(ko00470);;Pyruvate metabolism(ko00620);;Glyoxylate and dicarboxylate metabolism(ko00630);;Carbon fixation in photosynthetic organisms(ko00710);;Biosynthesis of various plant secondary metabolites(ko00999);;Metabolic pathways(ko01100);;Biosynthesi…	--	--	--	--	HMDB0000223	328-42-7	Organic compounds	Organic acids and derivatives	Keto acids and derivatives	Short-chain keto acids and derivatives	551.91	318.417	390.854	277.661	469.747	257.89	284.212	315.032	533.105	394.37	516.692	388.125	478.436	332.227	376.31	285.874	710.681	334.99	309.979	443.15
neg_3103	Oxalate	40.8	39.5	-40.1154	C2H2O4	178.98	11.4349	C00209	Purine metabolism(ko00230);;Glyoxylate and dicarboxylate metabolism(ko00630);;Metabolic pathways(ko01100)	--	--	--	--	HMDB0002329	144-62-7	Organic compounds	Organic acids and derivatives	Carboxylic acids and derivatives	Dicarboxylic acids and derivatives	4284.16	2438.21	3131.63	2164.19	3560.63	2029.46	2093.86	2430.58	4240.73	3091.17	3894.37	3017.03	3879.54	2522.22	2760.79	2179.85	5209.82	2746.35	2475.01	3644.52
neg_3128	Pseudolaric Acid C	45.1	41.3	-3.50631	C21H26O7	425.136	2.00355	--	--	--	--	--	--	--	--	--	--	--	--	230.08	85.579	221.844	81.7618	74.6129	103.687	136.98	107.875	108.582	106.938	63.0455	106.832	74.7932	83.2765	104.759	119.379	138.242	116.495	134.04	70.0646
neg_3130	6-Benzoylheteratisine	45	39.9	12.0936	C29H37NO6	530.237	1.9964	--	--	--	--	--	--	--	--	--	--	--	--	117.896	411.601	206.632	431.477	116.59	1768.04	2830.82	2123.94	425.186	2098.97	22.3181	154.42	144.708	204.048	1223.75	1985.88	414.327	794.085	1650.72	682.877
neg_3134	Bruceine E	45.6	63.4	-32.899	C20H28O9	411.152	2.0107	--	--	--	--	--	--	--	--	--	--	--	--	70.541	109.616	105.234	133.384	22.488	262.569	324.999	321.618	162.916	532.103	27.0777	178.164	71.5626	140.661	162.329	469.306	217.976	534.548	712.233	852.145
neg_3135	S-Allyl-L-cysteine	43.3	28.7	0.107931	C6H11NO2S	206.049	2.02498	C16759	--	--	--	--	--	--	--	--	--	--	--	14.4115	23.2559	18.8766	17.9082	16.6545	23.5851	16.9196	15.9154	12.047	33.1424	123.317	56.1221	51.7485	44.1576	39.3242	32.1662	97.738	46.3896	33.2422	51.4279
neg_3136	Levetiracetam	47.3	58.8	16.8589	C8H14N2O2	215.107	2.02498	C07841	--	--	--	--	--	HMDB0015333	102767-28-2	Organic compounds	Organic acids and derivatives	Carboxylic acids and derivatives	Amino acids, peptides, and analogues	1.23e-12	145.27	174.1	135.094	157.27	48.7531	66.6705	65.2903	10.4273	13.5172	19.6052	186.892	131.549	110.961	274.005	62.2153	22.6643	13.0753	29.8984	22.7311
neg_3148	Primary fluorescent chlorophyll catabolite	48.1	71.1	2.65854	C35H40N4O7	673.29	2.01785	C18098	Porphyrin metabolism(ko00860);;Biosynthesis of secondary metabolites(ko01110)	--	--	--	--	--	--	--	--	--	--	49.734	31.4248	67.4824	99.8187	7.45457	401.833	477.069	431.106	486.423	286.447	20.9844	77.0493	25.2554	91.1095	255.329	551.461	132.235	414.227	515.494	215.14
neg_3150	Precorrin 8X	43.9	55.8	2.40103	C45H60N4O14	901.387	2.01785	C06408	Porphyrin metabolism(ko00860);;Metabolic pathways(ko01100);;Biosynthesis of cofactors(ko01240)	--	--	--	--	--	--	--	--	--	--	23.8539	18.124	60.4643	34.7773	20.8072	80.6254	114.411	105.249	38.8249	8.75461	1.23e-12	13.4013	1.23e-12	5.23829	105.138	82.0373	1.23e-12	38.6998	66.8771	1.23e-12
neg_3152	Ile-Asn	47.7	52.9	9.97139	C10H19N3O4	244.133	2.03858	--	--	--	--	--	--	HMDB0028902	--	Organic compounds	Organic acids and derivatives	Carboxylic acids and derivatives	Amino acids, peptides, and analogues	77.172	197.55	275.28	329.182	116.577	208.455	345.165	250.254	123.619	206.239	66.6912	134.608	110.045	196.394	464.095	407.633	165.358	291.699	445.447	362.062
neg_3157	2-Dehydropantoate	44	41.8	14.1189	C6H10O4	145.053	2.05288	C00966	Pantothenate and CoA biosynthesis(ko00770);;Metabolic pathways(ko01100);;Biosynthesis of secondary metabolites(ko01110);;Biosynthesis of cofactors(ko01240)	--	--	--	--	HMDB0304068	--	Organic compounds	Organic acids and derivatives	Keto acids and derivatives	Short-chain keto acids and derivatives	44.8326	17.454	20.7852	32.7283	17.8558	5.42292	12.5856	5.57812	22.6123	13.331	18.2639	39.9522	6.12081	21.9168	20.0634	31.7784	80.2031	25.38	22.0518	49.4352
neg_3163	Heteroclitin D	45	40.8	-4.28317	C27H30O8	527.19	2.04575	--	--	--	--	--	--	--	--	--	--	--	--	827.658	2566.89	5321.24	2827.35	2488.4	1451.01	1919.74	1795.24	474.41	446.624	1099.25	3335.72	1489.44	2051.29	3480.86	1473.15	500.663	889.007	1334.19	469.099
neg_3165	Urdamycin A	52.6	86.2	-8.3487	C43H56O17	879.325	2.04575	C12413	Biosynthesis of secondary metabolites(ko01110)	--	--	--	--	--	--	--	--	--	--	112.388	737.437	681.636	698.139	97.819	524.054	738.335	679.959	315.711	169.939	159.889	1628.54	113.317	1005.19	535.501	597.916	27.2303	276.874	678.147	19.9579
neg_3168	Oxytocin	48.8	95.4	-38.726	C43H66N12O12S2	1041.37	2.07433	C00746	--	--	--	--	--	HMDB0002865	50-56-6	Organic compounds	Organic acids and derivatives	Carboxylic acids and derivatives	Amino acids, peptides, and analogues	266.877	614.999	755.943	518.394	76.5703	357.788	710.115	648.948	187.462	91.46	370.73	1485.06	119.866	470.982	568.742	284.913	136.275	214.911	375.123	1.23e-12
neg_317	Picrasidine I	47.3	55	-6.57187	C14H12N2O2	285.1	0.540767	--	--	--	--	--	--	--	--	--	--	--	--	204.455	171.491	143.237	147.967	175.829	146.21	128.842	177.084	156.957	104.808	214.229	183.685	283.71	129.865	224.165	96.1643	266.591	91.1487	177.359	94.259
neg_3177	4'-Oxonebramine	48	55	12.2304	C12H24N4O5	325.153	2.06718	C21258	Neomycin, kanamycin and gentamicin biosynthesis(ko00524);;Biosynthesis of secondary metabolites(ko01110)	--	--	--	--	--	--	--	--	--	--	41.003	206.507	62.5182	47.6468	46.7626	15.8686	75.6495	115.497	363.581	57.8143	13.5971	69.7902	16.4834	192.724	58.1801	121.209	469.542	204.078	104.415	1146.96
neg_3178	N-Acetylbialaphos	46.1	47	-0.59233	C13H24N3O7P	386.11	2.06718	C17951	Phosphonate and phosphinate metabolism(ko00440);;Biosynthesis of secondary metabolites(ko01110)	--	--	--	--	--	--	--	--	--	--	357.201	49.5228	155.356	67.7534	23.4605	34.0842	1.23e-12	32.6749	449.897	363.354	188.662	151.368	106.264	170.54	1.23e-12	34.1159	151.715	95.416	79.0412	45.9629
neg_3180	Nimodipine	45.5	60.2	2.85179	C21H26N2O7	439.15	2.06718	C07267	--	--	--	--	--	HMDB0014537	66085-59-4	Organic compounds	Organoheterocyclic compounds	Pyridines and derivatives	Hydropyridines	55.567	191.017	160.999	264.023	78.6239	274.84	419.826	263.369	31.8493	77.267	223.056	404.94	31.2694	304.797	411.214	512.075	303.995	466.879	590.814	271.693
neg_3181	Pseudobufarenogin	46.1	64.5	-10.9149	C24H32O6	451.185	2.07433	--	--	LMST01130069	Sterol Lipids [ST]	Sterols [ST01]	Bufanolides and derivatives [ST0113]	--	--	--	--	--	--	357.319	238.707	303.836	420.62	210.734	645.337	1024.08	794.026	212.312	414.492	294.441	270.43	119.106	184.286	605.302	838.159	229.81	622.464	719.881	518.878
neg_3184	Hesperetin-7-O-neohesperidoside(Neohesperidin)	45	56.7	31.574	C28H34O15	655.207	2.07433	--	--	--	--	--	--	--	--	--	--	--	--	811.603	889.017	1171.44	1130.76	520.225	117971	93875.3	84858.8	302735	156307	956.155	1110	363.069	3745.82	1241.78	30035.1	73162.9	84556	56498.8	16240.5
neg_319	Proxyphylline	46	51.4	-4.13944	C10H14N4O3	259.08	0.540767	--	--	--	--	--	--	HMDB0256878	--	Organic compounds	Organoheterocyclic compounds	Imidazopyrimidines	Purines and purine derivatives	1900.58	1477.75	899.285	1542.61	1172.84	1613.23	1765.24	1427.51	1617.04	2183.07	793.038	769.622	1033.28	884.384	971.502	2366.33	1682.46	1981.89	2312.66	2497.73
neg_3194	Danmelittoside	48	62.7	-3.25583	C15H22O10	769.238	2.06718	--	--	--	--	--	--	--	--	--	--	--	--	1128.92	411.943	745.592	477.93	353.44	457.679	901.736	319.589	1510.86	819.217	764.045	717.797	274.443	1424.51	162.569	419.566	1072.35	762.932	373.142	677.741
neg_32	5-Chloro-2-hydroxy-p-benzoquinone	45.7	77.1	-34.0139	C6H3ClO3	360.942	0.512183	C21105	Metabolic pathways(ko01100)	--	--	--	--	--	--	--	--	--	--	226.381	160.587	154.045	116.067	170.808	109.954	118.925	118.183	222.714	224.193	70.8347	33.0049	92.5929	155.85	100.579	169.112	134.922	233.573	159.836	260.298
neg_3203	Rebaudioside A	51	78.6	8.04544	C44H70O23	1001.41	2.0815	--	--	LMPR01040126	Prenol Lipids [PR]	Isoprenoids [PR01]	C20 isoprenoids (diterpenes) [PR0104]	HMDB0034950	58543-16-1	Organic compounds	Lipids and lipid-like molecules	Prenol lipids	Terpene glycosides	21.9165	7.63652	22.6969	14.1757	1.23e-12	366.8	697.178	453.482	135.745	88.4419	1.23e-12	14.1541	1.23e-12	14.558	19.7885	285.266	1.23e-12	252.747	231.592	1.23e-12
neg_3210	Rhizocticin C	52.5	74.7	-5.78711	C17H33N6O7P	485.187	2.0815	C17960	Phosphonate and phosphinate metabolism(ko00440)	--	--	--	--	--	--	--	--	--	--	2922.04	1003.29	2476.08	1369.53	1847.15	1502.75	2153.52	1841.4	2567.01	1373.59	1370.66	1641.84	1485.74	907.436	1171.24	1295.09	1418.32	1309.82	1458.82	826.028
neg_3216	Wilfornine A	43.9	52.2	-6.55729	C45H51NO20	970.293	2.0815	--	--	--	--	--	--	--	--	--	--	--	--	209.945	85.5881	154.925	80.7868	14.7302	4765.52	2458.99	2308.73	6179.61	4105.19	143.627	105.655	37.4032	36.8626	56.3183	991.846	2823.63	1823.52	1079.1	54.013
neg_3220	Lactucin	45.8	69.9	48.5663	C15H16O5	275.106	2.08863	C09489	--	--	--	--	--	HMDB0035814	1891-29-8	Organic compounds	Organoheterocyclic compounds	Lactones	Gamma butyrolactones	680.511	1536.98	1193.28	1257.36	1165.37	613.27	655.357	676.424	294.394	339.216	830.762	1544.47	1163.67	1077.9	1295.15	354.991	700.352	378.773	495.518	204.169
neg_3225	3A-Deolivosylpremithramycin B	46.2	66.9	-35.6165	C47H62O21	961.337	2.08863	C18710	Metabolic pathways(ko01100);;Biosynthesis of secondary metabolites(ko01110)	--	--	--	--	--	--	--	--	--	--	147.398	40.4996	38.1106	32.078	5.15544	1225.5	519.65	532.467	3005.48	3159.8	178.073	164.213	35.4788	50.5181	70.2798	482.851	1949.03	1258.02	422.57	117.107
neg_3226	Bacopaside I	45.8	74.6	-32.6155	C46H74O20S	999.392	2.08863	--	--	--	--	--	--	HMDB0248841	--	Organic compounds	Lipids and lipid-like molecules	Prenol lipids	Triterpenoids	38.1174	26.6427	143.665	50.3647	9.64655	373.62	740.474	464.764	233.397	86.8572	5.74051	75.3571	1.23e-12	6.90889	80.6894	257.366	28.3283	173.925	240.864	1.23e-12
neg_3229	2'-Dehydrokanamycin A	46.5	81.7	-40.9143	C18H34N4O11	503.142	2.09578	C20509	Neomycin, kanamycin and gentamicin biosynthesis(ko00524);;Biosynthesis of secondary metabolites(ko01110)	--	--	--	--	--	--	--	--	--	--	5274.86	4426.47	4199.7	4024.48	4410.69	4469.66	3951.98	3883.76	5599.87	3491.92	1916.14	3758.68	4624.19	2819.57	3608.21	3663.73	3693.37	3745.06	4039.56	3533.64
neg_323	L-Histidinal	40.7	22.3	10.1757	C6H9N3O	277.145	0.540767	C01929	Histidine metabolism(ko00340);;Metabolic pathways(ko01100);;Biosynthesis of secondary metabolites(ko01110)	--	--	--	--	HMDB0012234	23784-15-8	Organic compounds	Organic nitrogen compounds	Organonitrogen compounds	Amines	26.7463	20.6107	30.4074	21.578	14.5618	14.9417	11.3676	16.5868	22.3295	16.5292	75.3949	24.2877	30.1358	13.0311	16.3413	13.1697	56.9049	21.0393	16.5083	14.253
neg_3230	C1'-C9-Glycosylated UWM6	41.5	52.8	-45.7049	C25H28O9	517.15	2.10293	C18681	Biosynthesis of secondary metabolites(ko01110)	--	--	--	--	--	--	--	--	--	--	455.748	180.144	210.766	110.95	177.614	316.408	7.31866	70.0401	277.201	157.718	76.6915	300.399	226.133	187.737	1.36344	61.7531	115.454	135.362	89.6506	218.228
neg_3234	beta-Alanyl-L-lysine	42.7	40.6	-15.6344	C9H19N3O3	252.109	2.11008	C05341	beta-Alanine metabolism(ko00410);;Metabolic pathways(ko01100)	--	--	--	--	HMDB0060442	--	Organic compounds	Organic acids and derivatives	Peptidomimetics	Hybrid peptides	49.1165	67.2338	95.0912	118.749	33.7254	86.596	155.029	123.905	14.088	49.4608	1.23e-12	59.2751	26.1527	55.3803	75.3724	170.184	13.1555	135.397	150.928	137.962
neg_3236	Biotin sulfoxide	43	31.1	9.05786	C10H16N2O4S	305.084	2.11008	C20386	Biotin metabolism(ko00780);;Metabolic pathways(ko01100)	--	--	--	--	HMDB0249229	--	Organic compounds	Organoheterocyclic compounds	Biotin and derivatives	--	683.496	653.092	643.905	1290.64	299.69	1582.58	2108.79	1691.08	437.29	1779.15	617.621	980.49	399.774	884.944	569.637	2752.46	593.517	1812.76	2192.17	1195.78
neg_3248	Feruloylhistamine	43.2	40.1	11.7002	C15H17N3O3	332.129	2.11723	--	--	--	--	--	--	--	--	--	--	--	--	668.618	839.25	790.696	1355.32	428.536	1239.45	1620.34	1232.78	392.249	566.099	150.419	368.407	429.976	498.074	752.92	2191.51	392.634	2082.31	2237.59	1123.2
neg_3253	CMP-pseudaminic acid	46.8	60.1	-15.3166	C22H34N5O15P	638.162	2.12438	C20083	Amino sugar and nucleotide sugar metabolism(ko00520);;Metabolic pathways(ko01100);;Biosynthesis of nucleotide sugars(ko01250)	--	--	--	--	--	--	--	--	--	--	78.464	70.0023	47.0564	84.2364	40.6183	236.527	60.8654	64.508	92.7298	42.9372	74.0836	87.8713	77.039	82.6045	71.4234	99.9099	101.705	109.245	416.409	159.127
neg_3257	2-(2'-Methylthio)ethylmalic acid	40	16.9	3.19587	C7H12O5S	207.034	2.13153	C17210	Glucosinolate biosynthesis(ko00966);;Biosynthesis of secondary metabolites(ko01110);;2-Oxocarboxylic acid metabolism(ko01210)	--	--	--	--	--	--	--	--	--	--	60.2559	42.5468	42.1725	43.5991	26.6225	43.6006	48.4482	38.8205	61.3233	79.6707	96.5992	45.6279	40.9764	58.4088	23.8193	88.049	92.9215	131.75	81.2224	136.139
neg_326	N-Acetyl-D-glucosamine-1-phosphate	40.5	26.7	-12.7413	C8H16NO9P	336.022	0.540767	--	--	--	--	--	--	--	--	--	--	--	--	104.831	144.988	136.521	86.0471	188.654	110.979	95.4789	73.1636	73.2338	150.623	25.1959	18.7404	33.798	114.575	68.9066	138.72	62.2798	78.0612	92.6463	159.178
neg_3260	S-Adenosyl-L-methionine	47	69.1	16.2145	C15H22N6O5S	433.113	2.13153	C00019	Monobactam biosynthesis(ko00261);;Cysteine and methionine metabolism(ko00270);;Arginine and proline metabolism(ko00330);;Zeatin biosynthesis(ko00908);;Biosynthesis of various plant secondary metabolites(ko00999);;Metabolic pathways(ko01100);;Biosynthesis of secondary metabolites(ko01110);;Biosynthesis of amino acids(ko01230);;Biosynthesis of cofactors(ko01240);;Sulfur relay system(ko04122)	--	--	--	--	HMDB0001185	485-80-3	Organic compounds	Nucleosides, nucleotides, and analogues	5'-deoxyribonucleosides	5'-deoxy-5'-thionucleosides	61.8188	37.8554	53.5393	29.9544	75.1065	13.2186	11.0909	11.9179	46.6458	15.6695	99.8061	124.977	51.2722	119.332	35.2432	4.29864	144.279	18.1996	4.63161	17.1145
neg_3276	3-Butyn-1-al	44	48.1	27.4991	C4H4O	113.026	2.15298	C06145	Butanoate metabolism(ko00650)	--	--	--	--	HMDB0006853	52844-23-2	Organic compounds	Organic oxygen compounds	Organooxygen compounds	Carbonyl compounds	48.8476	150.301	139.993	94.5771	111.585	198.891	11.0046	44.2251	6.0349	9.60246	33.4004	101.081	16.5066	134.871	62.5591	60.4428	57.6751	50.1384	195.073	77.2124
neg_3277	(R)-4-Dehydropantoate	44.7	48.1	9.1493	C6H10O4	145.052	2.15298	C01053	Pantothenate and CoA biosynthesis(ko00770)	LMFA01050458	Fatty Acyls [FA]	Fatty Acids and Conjugates [FA01]	Hydroxy fatty acids [FA0105]	--	--	--	--	--	--	9.66682	7.84756	1.50328	7.97772	1.23e-12	73.2061	26.2322	29.7345	12.1059	22.4822	13.5937	10.694	1.23e-12	17.4748	0.55165	30.2732	24.9705	18.0581	59.7872	39.7277
neg_3278	myo-Inositol	44.9	39.3	7.1199	C6H12O6	179.057	2.15298	C00137	Galactose metabolism(ko00052);;Ascorbate and aldarate metabolism(ko00053);;Inositol phosphate metabolism(ko00562);;Metabolic pathways(ko01100);;Biosynthesis of secondary metabolites(ko01110);;Biosynthesis of nucleotide sugars(ko01250);;ABC transporters(ko02010);;Phosphatidylinositol signaling system(ko04070)	--	--	--	--	HMDB0000211	87-89-8	Organic compounds	Organic oxygen compounds	Organooxygen compounds	Alcohols and polyols	2751.51	8848.67	8211.16	6324.39	6449.46	11888.8	1047.95	2589.64	1035.58	1020.39	2208.27	6182.48	1455.45	7989.08	3418.42	3712.78	3115.45	2652.34	10409.5	4547.16
neg_3279	(-)-Sedamine	44.8	37.9	4.38427	C14H21NO	240.138	2.14583	C10171	Tropane, piperidine and pyridine alkaloid biosynthesis(ko00960)	--	--	--	--	--	--	--	--	--	--	1.23e-12	1.23e-12	10.2523	56.5147	1.23e-12	35.8196	357.647	229.034	5.04046	33.6214	1.23e-12	5.19554	1.23e-12	1.23e-12	102.762	454.531	30.9623	151.788	311.553	187.486
neg_3280	6-Methoxyflavanone	40.9	14.1	-4.17974	C16H14O3	253.086	2.15298	--	--	--	--	--	--	--	--	--	--	--	--	204.946	122.796	96.1297	134.14	215.482	56.0523	71.1154	57.7095	168.333	204.68	181.946	144.694	143.35	152.896	57.3622	56.7878	168.132	139.86	77.6455	83.7393
neg_3282	Dhurrin	46.9	42.8	3.6007	C14H17NO7	346.071	2.15298	C05143	Cyanoamino acid metabolism(ko00460);;Metabolic pathways(ko01100);;Biosynthesis of secondary metabolites(ko01110)	--	--	--	--	HMDB0060471	499-20-7	Organic compounds	Organic oxygen compounds	Organooxygen compounds	Carbohydrates and carbohydrate conjugates	3341.4	9225.4	8048.66	6508.65	8229.77	11426.2	849.206	2412.48	1140.57	1121.95	2351.56	6392.28	1347.65	8340.07	4008.16	3618.65	3841.37	3125.13	11051.9	6727.29
neg_3284	2-Hydroxy-1,4-benzoxazine-3(2H)-one glucoside (HBOA glucoside)	43	26.2	-3.63185	C14H17NO8	348.069	2.15298	--	--	--	--	--	--	--	--	--	--	--	--	509.25	1606.37	1431.28	1113.02	1512.19	1766.39	77.1482	347.717	99.8384	117.618	314.568	1093.9	180.238	1376.24	680.141	569.053	587.264	458.886	1713.71	1248.94
neg_3286	alpha-Mangostin	42.3	29.4	3.86038	C24H26O6	445.144	2.14583	--	--	--	--	--	--	HMDB0035796	6147-11-01	Organic compounds	Organoheterocyclic compounds	Benzopyrans	1-benzopyrans	464.89	674.124	561.252	540.327	388.752	927.572	847.347	803.071	889.994	402.549	180.165	479.064	89.5362	449.156	439.609	743.84	257.487	541.705	1242.14	604.612
neg_3293	Pelargonidin 3-(6-p-coumaroyl)glucoside	43.2	44.8	-23.6475	C30H27O12+	614.106	2.15298	C16368	Anthocyanin biosynthesis(ko00942)	--	--	--	--	--	--	--	--	--	--	450.51	724.359	832.101	499.638	918.328	402.682	46.69	220.381	151.052	103.132	293.851	654.341	266.108	625.159	342.904	276.854	452.875	320.261	460.736	530.183
neg_3297	Guanosine 5'-monophosphate	40.3	20.6	-5.76284	C10H14N5O8P	725.105	2.14583	C00144	Purine metabolism(ko00230);;Metabolic pathways(ko01100);;Nucleotide metabolism(ko01232)	--	--	--	--	HMDB0001397	85-32-5	Organic compounds	Nucleosides, nucleotides, and analogues	Purine nucleotides	Purine ribonucleotides	347.295	717.575	364.061	170.811	738.07	344.583	11.0518	68.0585	108.197	32.8303	183.318	272.577	191.288	468.668	212.635	86.0461	164.347	67.6631	533.931	180.468
neg_3300	2,3-Dihydroxypropanal	44.7	45.9	18.2868	C3H6O3	89.0261	2.15298	C02154	--	--	--	--	--	HMDB0001051	56-82-6	Organic compounds	Organic oxygen compounds	Organooxygen compounds	Carbohydrates and carbohydrate conjugates	24.5366	96.2077	71.8014	64.4287	61.5874	117.208	3.23863	23.5971	1.23e-12	1.75969	16.2687	64.6225	4.07217	90.3418	29.7739	38.948	24.3567	26.8372	126.3	42.2893
neg_3302	Quercetin-3-O-gentiotetroside	48.4	72.6	-21.0189	C39H50O27	985.203	2.14583	--	--	--	--	--	--	--	--	--	--	--	--	11.0973	740.588	170.936	5.84186	93.8536	2018.67	1.23e-12	1.02416	23.5236	2.00618	28.7135	306.845	14.8404	837.394	1.23e-12	22.604	6.4829	3.53068	2442.79	255.048
neg_3303	Indole-3-carboxylic acid	43.3	42.2	14.9287	C9H7NO2	160.043	2.16013	C19837	--	--	--	--	--	HMDB0003320	771-50-6	Organic compounds	Organoheterocyclic compounds	Indoles and derivatives	Indolecarboxylic acids and derivatives	49.181	23.7193	24.0913	21.0386	29.95	24.9192	4.99243	5.3666	5.32383	19.599	90.692	55.148	41.7624	38.1537	35.7329	26.9213	76.5798	58.4727	42.1262	36.035
neg_3306	Rotenone	42.6	48.8	-27.0439	C23H22O6	429.1	2.16013	C07593	Isoflavonoid biosynthesis(ko00943);;Biosynthesis of secondary metabolites(ko01110)	LMPK12060007	Polyketides [PK]	Flavonoids [PK12]	Rotenoid flavonoids [PK1206]	HMDB0034436	83-79-4	Organic compounds	Phenylpropanoids and polyketides	Isoflavonoids	Rotenoids	1134.7	30.7627	33.4545	24.3188	866.859	4.39454	20.5412	15.7362	250.752	15.8818	325.027	114.148	221.001	4.86113	13.9781	3.88767	122.04	22.426	0.521849	12.6512
neg_3308	Polyporusterone B	47.8	57.1	-10.2371	C28H44O6	497.284	2.16013	--	--	--	--	--	--	HMDB0038496	141360-89-6	Organic compounds	Lipids and lipid-like molecules	Steroids and steroid derivatives	Bile acids, alcohols and derivatives	1.23e-12	1.23e-12	1.23e-12	1.23e-12	1.23e-12	30.419	144.261	12.7642	1.23e-12	9.06916	1.23e-12	1.23e-12	1.23e-12	1.23e-12	1.60076	199.265	1.23e-12	221.316	78.0147	669.937
neg_3311	Apigenin 7-O-[beta-D-apiosyl-(1->2)-beta-D-glucoside]	47.3	67.4	-20.8984	C26H28O14	609.134	2.16013	C04858	Flavone and flavonol biosynthesis(ko00944)	--	--	--	--	HMDB0030843	26544-34-3	Organic compounds	Benzenoids	Naphthalenes	Phenylnaphthalenes	445.144	276.716	289.795	207.16	192.807	158.748	79.2933	81.353	345.567	467.705	320.847	450.269	202.117	342.415	24.9946	29.041	361.432	173.977	85.4682	329.751
neg_3313	27-O-Demethyl-25-O-desacetylrifamycin SV	48.3	83.4	-47.6047	C34H43NO11	662.228	2.16013	C14725	Biosynthesis of secondary metabolites(ko01110)	--	--	--	--	--	--	--	--	--	--	5872.45	15040.9	7035.52	8446.97	4824.49	11189.9	2434.68	3861.02	2099.29	2768.58	7791.58	14704.8	2203.17	15339.5	3553.89	5228.76	8734.64	7378.49	11093.2	6706.83
neg_3316	Delphinidin-3-O-rutinoside-7-O-glucoside	45.3	47.7	-4.26653	C33H41O21+	772.203	2.16013	--	--	--	--	--	--	--	--	--	--	--	--	760.165	1755.17	1969.11	1983.31	1451.2	2054.19	1597.25	1662.07	1225.4	1279.71	417.756	1886.66	199.3	1206.63	1497.24	1487.15	929.338	1454.65	2022.76	909.522
neg_3319	Indole	40.4	28.4	16.1208	C8H7N	116.052	2.17443	C00463	Tryptophan metabolism(ko00380);;Phenylalanine, tyrosine and tryptophan biosynthesis(ko00400);;Benzoxazinoid biosynthesis(ko00402);;Biosynthesis of various plant secondary metabolites(ko00999);;Metabolic pathways(ko01100);;Biosynthesis of secondary metabolites(ko01110)	--	--	--	--	HMDB0000738	120-72-9	Organic compounds	Organoheterocyclic compounds	Indoles and derivatives	Indoles	516.485	414.439	660.699	585.09	582.195	212.427	412.419	404.914	328.305	425.396	406.675	597.85	598.753	410	537.36	294.084	488.096	330.652	277.782	440.858
neg_3322	3-hydroxy-3-methyl-Glutaric acid	42.7	32.3	10.359	C6H10O5	161.047	2.17443	--	--	--	--	--	--	HMDB0000355	503-49-1	Organic compounds	Lipids and lipid-like molecules	Fatty Acyls	Fatty acids and conjugates	813.153	853.825	780.309	608.92	1031.66	933.97	297.483	444.713	681.351	410.936	763.882	700.576	1186.87	777.13	797.796	322.662	703.442	321.82	663.2	390.607
neg_3330	N-Acetylneuraminate	47.6	60.3	1.01482	C11H19NO9	344.076	2.17443	C00270	Amino sugar and nucleotide sugar metabolism(ko00520);;Metabolic pathways(ko01100);;Biosynthesis of nucleotide sugars(ko01250)	--	--	--	--	HMDB0000230	19342-33-7	Organic compounds	Organic oxygen compounds	Organooxygen compounds	Carbohydrates and carbohydrate conjugates	1244.92	1013.86	1497.86	526.173	1101.66	334.116	206.517	291.298	941.723	736.959	1650.14	1101.71	1515.77	1039.72	895.244	175.361	849.845	255.461	330.534	580.34
neg_3333	4'-O-Desmethylpapaveroxine	41.3	42.4	-19.5158	C21H23NO7	422.114	2.17443	C21599	Isoquinoline alkaloid biosynthesis(ko00950);;Biosynthesis of secondary metabolites(ko01110)	--	--	--	--	--	--	--	--	--	--	232.159	112.279	167.941	100.247	179.897	95.5489	73.8995	69.4131	188.699	147.044	178.262	169.61	160.49	113.595	77.0849	71.2716	208.642	102.756	118.76	195.348
neg_3335	Neopterin	45.7	41.7	5.03585	C9H11N5O4	505.157	2.16727	C05926	Folate biosynthesis(ko00790)	--	--	--	--	HMDB0000845	2009-64-5	Organic compounds	Organoheterocyclic compounds	Pteridines and derivatives	Pterins and derivatives	208.945	99.475	161.163	167.122	131.151	761.982	185.243	204.658	129.218	177.254	135.133	147.316	103.153	205.328	165.694	165.267	124.245	156.097	542.513	205.059
neg_3348	Icosenoyl-CoA	42.2	54.2	-16.3308	C41H72N7O17P3S	1080.35	2.18157	C16530	Biosynthesis of unsaturated fatty acids(ko01040);;Fatty acid metabolism(ko01212)	LMFA07050093	Fatty Acyls [FA]	Fatty esters [FA07]	Fatty acyl CoAs [FA0705]	--	--	--	--	--	--	4647.88	2104.09	3487.63	1755.33	1827.83	1337.65	3240.27	1724.6	1021.88	267.694	924.07	2531.98	2458.26	1005.95	1281.33	685.442	263.906	526.33	1006.79	2.86375
neg_3349	gamma-Amino-gamma-cyanobutanoate	45.1	39.3	12.039	C5H8N2O2	163.043	2.18157	C05715	Cyanoamino acid metabolism(ko00460);;Metabolic pathways(ko01100)	--	--	--	--	--	--	--	--	--	--	655.089	212.105	375.575	200.632	336.224	1641.4	159.978	317.07	361.356	567.328	733.064	255.834	310.5	533.079	172.758	135.714	631.014	166.213	816.921	104.871
neg_3350	Glycylphenylalanine	42.2	27.4	9.78584	C11H14N2O3	221.095	2.18157	--	--	--	--	--	--	HMDB0028848	--	Organic compounds	Organic acids and derivatives	Carboxylic acids and derivatives	Amino acids, peptides, and analogues	187.334	480.758	574.223	1084.67	316.97	648.531	1042.93	817.95	240.284	638.31	174.714	309.588	264.665	401.231	550.817	1674.79	417.463	1265.5	1221.92	1183.37
neg_3351	Dopaquinone	46.1	60	-28.0994	C9H9NO4	240.046	2.18157	C00822	Tyrosine metabolism(ko00350);;Metabolic pathways(ko01100)	--	--	--	--	HMDB0001229	4430-97-1	Organic compounds	Organic acids and derivatives	Carboxylic acids and derivatives	Amino acids, peptides, and analogues	1421.4	996.044	1013.37	591.133	1286.77	575.033	401.075	582.02	1647.02	913.811	1371.7	829.506	1755.61	793.975	1221.7	386.072	1436.05	697.536	699.1	850.262
neg_3358	FR 900098	46.6	55.4	-1.00545	C5H12NO5P	242.043	2.18873	C17942	Phosphonate and phosphinate metabolism(ko00440)	--	--	--	--	--	--	--	--	--	--	526.931	364.071	337.022	198.538	460.764	193.963	163.363	237.351	566.997	355.5	463.747	295.18	630.571	285.756	384.653	191.638	529.482	298.57	277.086	403.329
neg_3359	1D-1-Guanidino-1-deoxy-3-dehydro-scyllo-inositol	50.1	61.5	-8.43122	C7H13N3O5	254.053	2.18873	C04673	Biosynthesis of secondary metabolites(ko01110)	--	--	--	--	--	--	--	--	--	--	51.8051	77.0392	43.7201	51.9639	163.576	12.8669	27.0641	1.23e-12	52.3607	32.6247	52.4988	90.3467	42.538	61.0268	23.5186	15.8564	29.2083	58.0815	4.59439	20.7898
neg_3361	p-Coumaroylcadaverine	41.7	11.9	1.80857	C14H20N2O2	293.151	2.18873	--	--	--	--	--	--	--	--	--	--	--	--	35.1762	282.641	255.443	1249.27	158.577	406.864	908.36	636.285	174.832	304.879	16.0374	62.5862	85.501	71.3297	456.096	1479.81	243.921	951.529	828.929	395.504
neg_3362	Protodeoxyviolaceinic acid	42.6	41.9	-20.5455	C21H15N3O2	362.084	2.18873	C21131	Metabolic pathways(ko01100);;Biosynthesis of secondary metabolites(ko01110)	--	--	--	--	--	--	--	--	--	--	27866.6	23446.3	21391.8	15047.7	32769.9	12422.2	8916.92	12749.4	22433.4	11531.9	28391	18194.3	43583.7	17678.1	28129.4	7274.07	20747.4	7406.42	12084.5	6926.02
neg_3373	N(alpha)-Acetyl-L-2,4-diaminobutyrate	42.9	46.1	-29.5787	C6H12N2O3	181.055	2.20302	C19929	Glycine, serine and threonine metabolism(ko00260);;Metabolic pathways(ko01100)	--	--	--	--	--	--	--	--	--	--	271.82	221.585	889.223	318.822	811.919	138.832	16.5539	17.783	70.6401	25.989	398.827	371.972	235.787	422.795	412.728	29.6449	61.8671	38.464	145.205	100.386
neg_3374	1-Methylhistidine	42.8	42	-20.607	C7H11N3O2	190.056	2.19588	C01152	Histidine metabolism(ko00340);;Metabolic pathways(ko01100)	--	--	--	--	HMDB0000001	332-80-9	Organic compounds	Organic acids and derivatives	Carboxylic acids and derivatives	Amino acids, peptides, and analogues	135.674	512.385	241.198	326.607	311.273	242.789	200.665	151.736	228.69	294.164	137.566	332.071	58.4107	268.416	71.2209	163.398	191.109	187.863	138.84	284.962
neg_3378	Cetoniacytone A	47	72.7	38.2315	C9H11NO5	234.047	2.19588	C17699	Biosynthesis of secondary metabolites(ko01110)	--	--	--	--	--	--	--	--	--	--	78.945	213.404	93.1213	108.63	120.685	81.846	56.0241	46.9004	94.3633	108.96	69.6137	142.142	28.9749	111.711	29.4256	53.3687	66.7325	63.0871	50.8683	115.886
neg_3381	Thiamine acetic acid	50.6	65.5	-0.241022	C12H15N4O2S+	300.066	2.19588	C02892	Thiamine metabolism(ko00730);;Metabolic pathways(ko01100)	--	--	--	--	--	--	--	--	--	--	1905.65	1520.6	1284.32	913.324	2177.24	857.787	627.476	1154.07	2116.04	955.576	1669.71	1257.83	2966.97	1219.9	2007.83	605.348	1318.81	697.214	967.871	883.123
neg_3386	12-Hydroxydihydrochelirubine	47.2	48.9	-0.945945	C21H17NO6	378.098	2.20302	C05193	Isoquinoline alkaloid biosynthesis(ko00950);;Metabolic pathways(ko01100);;Biosynthesis of secondary metabolites(ko01110)	--	--	--	--	--	--	--	--	--	--	126.855	432.527	329.592	372.907	394.665	716.161	41.6436	123.097	83.5989	69.4053	168.055	227.659	99.451	335.512	155.14	214.495	201.676	116.287	507.254	167.585
neg_3392	Astin I	44.2	76.3	-12.9686	C25H34ClN5O7	586.177	2.20302	--	--	--	--	--	--	HMDB0041419	161162-22-7	Organic compounds	Organic acids and derivatives	Peptidomimetics	Hybrid peptides	860.26	841.466	568.357	644.347	576.762	503.714	646.627	615.24	513.258	728.333	471.57	724.351	533.673	495.61	519.216	731.049	482.594	708.054	595.625	660.245
neg_3408	FAPy-adenine	47	53.5	8.49553	C5H7N5O	351.131	2.22448	--	--	--	--	--	--	HMDB0004816	5122-36-1	Organic compounds	Organoheterocyclic compounds	Diazines	Pyrimidines and pyrimidine derivatives	302663	191379	130221	127757	89755.9	68955.3	26894.6	78919.5	219825	221549	416758	273902	251162	224691	89507.9	78631.3	318333	138417	96327	178772
neg_3415	5a,11a-Dehydrotetracycline	48.7	62.1	6.16648	C22H22N2O8	441.133	2.21732	C03206	Metabolic pathways(ko01100);;Biosynthesis of secondary metabolites(ko01110)	--	--	--	--	--	--	--	--	--	--	883.81	629.892	343.359	541.713	314.465	475.091	339.998	367.821	427.137	581.124	983.79	780.915	411.405	742.802	282.692	441.002	864.951	473.802	643.141	544.489
neg_3416	Cephalosporin C	45.2	67.6	-33.6525	C16H21N3O8S	460.089	2.21732	C00916	Penicillin and cephalosporin biosynthesis(ko00311);;Metabolic pathways(ko01100);;Biosynthesis of secondary metabolites(ko01110)	--	--	--	--	HMDB0060450	--	Organic compounds	Organic acids and derivatives	Carboxylic acids and derivatives	Amino acids, peptides, and analogues	70.4566	143.7	44.593	86.9576	252.307	4.967	2.52843	8.4538	43.3952	5.53825	92.1542	154.63	87.5188	94.02	48.3411	1.23e-12	26.2693	0.450151	4.14869	12.765
neg_3417	Phosphonoformyl-CMP	42	24.1	-0.251099	C10H15N3O12P2	476.011	2.22448	C17945	Phosphonate and phosphinate metabolism(ko00440);;Biosynthesis of secondary metabolites(ko01110)	--	--	--	--	--	--	--	--	--	--	177.607	84.545	28.0393	17.3639	12.7835	2.76979	1.23e-12	5.53264	78.3172	49.6078	174.355	108.628	132.155	80.6354	1.23e-12	1.96392	130.951	30.0241	5.17802	84.9499
neg_3420	Bosentan	45.8	54.6	-4.09168	C27H29N5O6S	572.156	2.22448	--	--	--	--	--	--	HMDB0014699	147536-97-8	Organic compounds	Organoheterocyclic compounds	Diazines	Pyrimidines and pyrimidine derivatives	268.776	133.195	104.337	59.6579	71.1214	63.2991	23.5987	22.1188	143.94	111.945	269.727	191.209	151.847	140.17	17.9831	36.572	223.857	80.179	72.9488	142.383
neg_3426	Lobelanine	42.5	21	-0.233649	C22H25NO2	729.391	2.22448	C10157	Tropane, piperidine and pyridine alkaloid biosynthesis(ko00960);;Biosynthesis of secondary metabolites(ko01110)	--	--	--	--	--	--	--	--	--	--	5.96459	1026.6	589.265	704.259	371.542	4496.76	3876.49	4717.63	399.045	1913.17	0.124572	386.678	710.721	872.423	2302.01	5265.25	368.01	1117.45	2084.59	529.742
neg_3435	Calystegin A3	43.2	40.5	11.3499	C7H13NO3	158.084	2.23162	C10850	Tropane, piperidine and pyridine alkaloid biosynthesis(ko00960)	--	--	--	--	HMDB0038593	131580-36-4	Organic compounds	Alkaloids and derivatives	Tropane alkaloids	--	910.3	475.15	630.5	565.041	481.141	795.801	1006.43	691.659	586.157	652.48	661.891	836.249	377.387	439.573	246.509	1545.27	864.467	871.286	1273.55	783.893
neg_3436	Stilbostemin B	41.9	48.2	-12.8958	C15H16O2	249.1	2.23162	--	--	--	--	--	--	--	--	--	--	--	--	4310.51	3215.57	2577.99	2569.46	1617.39	1506.83	1418.91	1825.69	2947.73	3226.42	5153.54	4157.93	3683.41	3314.4	1769.96	2142.38	4154.24	2440.02	2449.32	3323.84
neg_3437	Phe-Ala	42.9	27.3	9.69655	C12H16N2O3	235.111	2.23162	--	--	--	--	--	--	HMDB0028988	3918-87-4	Organic compounds	Organic acids and derivatives	Carboxylic acids and derivatives	Amino acids, peptides, and analogues	67.0746	255.611	273.205	551.185	227.956	436.147	890.494	974.971	166.067	340.158	19.2914	174.255	101.953	147.54	814.254	993.723	201.483	690.813	653.517	871.124
neg_3442	Phenylalanyl-Asparagine	50.5	58.8	-1.15765	C13H17N3O4	617.257	2.23162	--	--	--	--	--	--	HMDB0028990	39537-20-7	Organic compounds	Organic acids and derivatives	Carboxylic acids and derivatives	Amino acids, peptides, and analogues	74.9021	199.202	235.129	302.773	80.8231	255.998	325.07	340.872	119.911	201.63	69.0627	138.91	54.677	161.349	279.395	421.407	124.988	322.584	357.846	277.125
neg_3447	Avermectin A1b	43	37.8	-2.45503	C48H72O14	871.483	2.23162	C11968	Metabolic pathways(ko01100);;Biosynthesis of secondary metabolites(ko01110)	LMPK04000021	Polyketides [PK]	Macrolides and lactone polyketides [PK04]	--	--	--	--	--	--	--	1.23e-12	7.69749	33.153	113.245	14.3687	29.9116	80.8455	61.2655	1.23e-12	1.23e-12	1.23e-12	5.33578	1.23e-12	1.23e-12	21.1563	362.916	1.23e-12	41.6991	156.794	7.41732
neg_3452	Columbamine	45	40.4	-2.39454	C20H20NO4+	675.27	2.23877	C01795	Isoquinoline alkaloid biosynthesis(ko00950);;Biosynthesis of secondary metabolites(ko01110)	--	--	--	--	--	--	--	--	--	--	39522.1	14231.7	14268.1	13296.4	10932.3	8144.38	10264.4	9428.15	23544.6	22566.9	44431.4	41333.8	26012.2	23342.9	10159.4	12169.2	36307.9	23073.4	15327.3	14787.6
neg_3455	5,10-Methenyltetrahydromethanopterin	44.4	56.2	12.0422	C31H44N6O16P+	808.239	2.23877	C04330	Metabolic pathways(ko01100);;Carbon metabolism(ko01200)	--	--	--	--	--	--	--	--	--	--	704.05	252.612	224.097	211.419	121.304	7387.83	7174.65	7336.4	10076.4	7703.68	1026.18	353.197	109.076	348.87	90.7295	3226.07	6073.65	5082.29	8090.71	2442.51
neg_3456	lariciresinol-4'-O-glucoside	40	40	-16.9702	C26H34O11	1043.4	2.25307	--	--	--	--	--	--	--	--	--	--	--	--	1247.73	313.517	1194.22	513.668	267.709	324.463	1988.74	745.885	241.702	16.0484	98.6547	795.144	258.065	130.232	188.922	577.857	7.83607	301.358	422.489	1.23e-12
neg_3459	Thioisonicotinamide	42.2	20.2	7.04263	C6H6N2S	183.005	2.24593	--	--	--	--	--	--	--	--	--	--	--	--	4166.46	2598.68	3437.06	2317.95	3736.87	1298.43	1388.21	1856.61	3391.67	2727.06	3494.5	2674.84	4385.92	2563.32	3218.55	1549.24	3994.64	1802.9	1734.03	3274.28
neg_346	Acetoxyisovalerylalkannin	45.9	39.9	-3.45416	C23H26O8	475.159	0.540767	--	--	--	--	--	--	--	--	--	--	--	--	62.5158	85.7249	33.876	126.829	37.0376	113.836	120.693	92.6206	39.7448	101.35	16.643	29.8556	30.6292	27.8517	55.7278	169.54	63.0529	110.516	170.042	125.123
neg_3469	(2-Aminobenzoyl)acetate	47.3	44.5	-5.63507	C9H9NO3	200.032	2.24593	C21453	Biosynthesis of secondary metabolites(ko01110)	--	--	--	--	--	--	--	--	--	--	58783	34667.7	47241.9	31981.5	50818.7	17648.1	18639.6	24723.7	45663.1	37356.9	51320.4	36445.5	60994.1	34650.4	43320.7	20479.1	58277.9	24411.9	22433.5	42364.5
neg_3471	4-tert-Octylphenol	40.4	8.28	1.55539	C14H22O	227.142	2.25307	C14205	--	--	--	--	--	--	--	--	--	--	--	994.085	1499.55	1368.08	5065.66	1366.39	2532.71	9951.01	5039.72	3542.04	1694.23	454.428	641.438	1832.64	1027.3	14919.7	9058.94	3683.6	3434.84	5865.22	3749.97
neg_348	Schisanwilsonin D	42.3	47	-15.9036	C27H34O9	537.182	0.540767	--	--	--	--	--	--	--	--	--	--	--	--	30.0938	68.0451	74.6665	124.011	55.6124	51.2645	61.4884	61.241	16.6242	23.7308	48.0016	63.0143	77.1269	33.4265	94.1122	36.313	38.9553	20.0316	43.3457	4.97283
neg_3482	Methylergonovine	45.6	63.5	33.7638	C20H25N3O2	360.181	2.24593	--	--	--	--	--	--	HMDB0014497	113-42-8	Organic compounds	Alkaloids and derivatives	Ergoline and derivatives	Lysergic acids and derivatives	0.131983	312.109	480.753	566.352	184.618	363.676	877.3	676.002	47.6985	222.42	0.630195	81.3864	68.9031	129.779	676.453	1059.8	94.7069	820.143	955.838	799.139
neg_3483	Capsazepine	48	57.7	-1.07618	C19H21ClN2O2S	397.075	2.24593	--	--	--	--	--	--	HMDB0249598	--	Organic compounds	Organoheterocyclic compounds	Benzazepines	--	629.569	259.913	449.236	268.515	661.801	175.577	140.323	298.694	459.829	443.255	592.739	332.478	715.332	345.643	497.395	154.081	636.947	213.255	210.559	443.158
neg_3484	Orcinol gentiobioside	52.2	76.3	9.36699	C19H28O12	493.155	2.24593	--	--	--	--	--	--	--	--	--	--	--	--	2240.24	1652.59	1374.54	1973.98	1142.41	27431.8	24143.2	19800.5	23650.3	30510.6	3343.72	1697.55	1889.07	2698.76	2875.17	18458.1	21697.4	26761.3	26897.4	17390.4
neg_3501	Iminoglycine	47.6	62.9	22.7944	C2H3NO2	72.0108	2.24593	C15809	Thiamine metabolism(ko00730);;Metabolic pathways(ko01100);;Biosynthesis of cofactors(ko01240)	--	--	--	--	--	--	--	--	--	--	129.548	86.1322	123.819	79.2003	105.258	37.7522	42.1894	58.4129	99.7372	88.1491	108.03	82.9597	132.823	89.3114	104.144	47.1678	113.206	49.7791	60.0617	123.639
neg_3506	Loroglossin	40.3	41.6	24.4492	C34H46O17	771.289	2.24593	--	--	--	--	--	--	--	--	--	--	--	--	542.705	238.299	359.837	530.005	403.964	2950.35	5836.33	3327.79	4270.51	4841.41	286.437	280.898	310.721	213.767	537.747	3646.14	4059.98	6330.74	5278.6	2565.54
neg_3519	Alangiside	48	68.4	-23.12	C25H31NO10	540.153	2.26023	C09330	Isoquinoline alkaloid biosynthesis(ko00950)	--	--	--	--	--	--	--	--	--	--	314.445	386.769	679.514	475.471	389.456	447.289	478.464	473.25	154.067	177.33	217.985	598.324	201.8	315.558	194.292	298.595	164.593	298.152	189.246	99.6649
neg_3523	2-Furoate	45.5	49.1	15.4066	C5H4O3	111.01	2.26737	C01546	Metabolic pathways(ko01100)	--	--	--	--	HMDB0000617	88-14-2	Organic compounds	Organoheterocyclic compounds	Furans	Furoic acid and derivatives	186.968	104.097	104.321	94.6819	127.797	105.628	123.128	88.9604	145.751	180.995	85.1377	79.3234	81.5368	115.68	68.8302	122.952	128.453	131.261	108.931	194.626
neg_3526	4-Hydroxycyclohexylcarboxylic acid	40.7	31.7	20.769	C7H12O3	189.08	2.26737	--	--	--	--	--	--	HMDB0001988	17419-81-7	Organic compounds	Organic oxygen compounds	Organooxygen compounds	Alcohols and polyols	1.23e-12	1.23e-12	1.23e-12	1.23e-12	1.23e-12	15.591	36.2704	1.23e-12	3.41579	11.3699	1.23e-12	1.23e-12	1.23e-12	6.51321	1.23e-12	1.05137	2.85267	1.23e-12	1.23e-12	3.27504
neg_3528	4-(L-gamma-Glutamylamino)butanoate	43.6	24.8	-1.22635	C9H16N2O5	253.08	2.27452	C15767	Arginine and proline metabolism(ko00330);;Metabolic pathways(ko01100)	--	--	--	--	HMDB0012161	5105-96-4	Organic compounds	Organic acids and derivatives	Carboxylic acids and derivatives	Amino acids, peptides, and analogues	788.636	432.197	463.075	438.008	664.928	128.867	171.791	192.217	779.407	588.748	385.067	491.161	514.965	460.792	213.312	83.5051	303.037	258.125	110.549	251.801
neg_3531	Triethyl citrate	40.3	19.9	-17.6737	C12H20O7	275.109	2.27452	--	--	--	--	--	--	HMDB0034263	77-93-0	Organic compounds	Organic acids and derivatives	Carboxylic acids and derivatives	Tricarboxylic acids and derivatives	73.9873	195.905	241.328	316.808	107.27	253.385	360.324	329.688	86.5401	238.001	81.7843	129.111	83.3086	137.703	182.822	408.564	133.068	373.704	361.988	281.835
neg_3533	2,3-Dihydrothienamycin	43.2	22.9	5.15606	C11H18N2O4S	319.098	2.26737	C20820	Carbapenem biosynthesis(ko00332);;Biosynthesis of secondary metabolites(ko01110)	--	--	--	--	--	--	--	--	--	--	1300.2	2200.77	2767.02	3395.26	1215.28	4181.66	5073.66	4978.45	1477.1	4328.1	1403.45	1957.8	930.889	2011.04	1744.91	5315.62	1853.65	4746.49	4210.42	4905.01
neg_3547	alpha,alpha'-Trehalose 6-phosphate	41.5	59.6	-42.8743	C12H23O14P	421.057	2.26737	C00689	Starch and sucrose metabolism(ko00500);;Metabolic pathways(ko01100);;Biosynthesis of secondary metabolites(ko01110)	--	--	--	--	HMDB0001124	4484-88-2	Organic compounds	Organic oxygen compounds	Organooxygen compounds	Carbohydrates and carbohydrate conjugates	861.574	353.769	525.41	303.375	646.373	91.0206	87.1888	178.856	637.295	557.218	723.953	513.896	761.588	391.707	340.355	109.143	774.697	257.944	177.018	805.118
neg_3560	3-Oxohexanoyl-CoA	40.4	48.3	-26.6001	C27H44N7O18P3S	924.142	2.27452	C05269	Fatty acid elongation(ko00062);;Fatty acid degradation(ko00071);;Metabolic pathways(ko01100);;Fatty acid metabolism(ko01212)	LMFA07050242	Fatty Acyls [FA]	Fatty esters [FA07]	Fatty acyl CoAs [FA0705]	HMDB0003943	19774-86-8	Organic compounds	Lipids and lipid-like molecules	Fatty Acyls	Fatty acyl thioesters	1.23e-12	1.23e-12	1.23e-12	1.23e-12	1.23e-12	430.562	1.23e-12	1.23e-12	1.23e-12	1.23e-12	1.23e-12	27.4637	1.23e-12	151.239	1.23e-12	1.23e-12	1.23e-12	1.23e-12	104.14	1.23e-12
neg_3564	Picein (4-Acetylphenyl-glucoside)	41.4	16.7	2.55012	C14H18O7	343.104	2.28168	--	--	--	--	--	--	--	--	--	--	--	--	365.694	313.977	363.674	403.424	383.258	260.441	121.988	179.386	658.047	2391.04	2033.35	500.497	1009.93	880.858	441.929	192.905	235.014	279.164	304.495	892.067
neg_3571	Picras-3-en-16-one, 11,20-epoxy-2-(β-D-glucopyranosyloxy)-1,11,12,14,15-pentahydroxy-, (1β,2α,11β,12α,15β)-	45.8	52.9	3.18992	C26H36O14	593.187	2.28168	--	--	--	--	--	--	--	--	--	--	--	--	935.925	549.949	1269.95	1050.09	953.885	421.85	866.363	615.001	379.761	291.259	649.886	584.39	684.649	486.367	801.53	579.145	484.386	755.296	442.061	656.223
neg_3573	GMP	41.7	22.7	1.46244	C10H14N5O8P	725.11	2.28168	C00144	Purine metabolism(ko00230);;Metabolic pathways(ko01100);;Nucleotide metabolism(ko01232)	--	--	--	--	HMDB0001397	85-32-5	Organic compounds	Nucleosides, nucleotides, and analogues	Purine nucleotides	Purine ribonucleotides	4.50884	8.29539	0.933661	6.79146	6.79962	141.165	1.23e-12	1.23e-12	3.99203	0.0891839	2.41735	7.39672	11.96	59.0159	11.048	1.23e-12	1.23e-12	1.23e-12	55.0895	0.393809
neg_3577	Galanthamine	45.8	39.7	4.57926	C17H21NO3	308.128	2.28882	C08526	Isoquinoline alkaloid biosynthesis(ko00950);;Biosynthesis of secondary metabolites(ko01110)	--	--	--	--	HMDB0014812	357-70-0	Organic compounds	Alkaloids and derivatives	Amaryllidaceae alkaloids	Galanthamine-type amaryllidaceae alkaloids	17.4341	60.561	154.446	120.432	42.4804	91.1699	159.717	140.487	38.4758	111.497	28.4784	77.659	37.2176	74.6368	165.393	175.267	52.259	145.002	177.116	196.425
neg_3581	Ingenol-5,20-acetonide-3-O-angelate	45.8	50.7	3.34033	C28H38O6	515.267	2.28882	--	--	--	--	--	--	--	--	--	--	--	--	72.4185	91.8994	100.277	205.953	4.73603	295.328	416.417	434.77	53.8412	127.106	103.844	152.062	28.1188	231.554	384.918	456.946	101.35	368.836	420.749	370.061
neg_3587	Cyclo(D-Val-L-Pro)	42.8	33	8.96093	C10H16N2O2	241.121	2.30312	--	--	--	--	--	--	--	--	--	--	--	--	143.88	125.266	221.251	129.997	132.267	64.6295	82.2501	78.7121	115.343	61.233	93.2102	202.372	76.6075	162.628	113.247	58.3467	67.4144	38.591	44.5961	42.884
neg_3589	N-Acetyl-a-neuraminic acid	46.8	53	-13.8457	C11H19NO9	330.076	2.30312	--	--	--	--	--	--	HMDB0000773	21646-00-4	Organic compounds	Organic oxygen compounds	Organooxygen compounds	Carbohydrates and carbohydrate conjugates	5366.33	2782.63	3682.21	1414.32	3674.52	1411.62	853.988	1385.18	6131.3	4171.42	9293.45	1893.98	6109.01	2873.23	3052.14	1469.24	6659	5076.95	1887.1	5038.41
neg_3593	(13S,14R)-1,13-Dihydroxy-N-methylcanadine	41.7	36	4.55445	C21H24NO6+	431.16	2.29598	C21587	Isoquinoline alkaloid biosynthesis(ko00950);;Metabolic pathways(ko01100);;Biosynthesis of secondary metabolites(ko01110)	--	--	--	--	--	--	--	--	--	--	143.771	150.075	171.49	175.651	178.04	132.867	209.002	161.557	159.5	166.871	193.318	180.545	207.038	148.217	198.833	236.068	258.097	220.682	228.972	284.241
neg_3597	Licorice glycoside C2	40.3	47.4	44.3268	C36H38O16	761.218	2.29598	--	--	LMPK12140031	Polyketides [PK]	Flavonoids [PK12]	Flavanones [PK1214]	--	--	--	--	--	--	519.351	185.636	326.407	172.707	249.077	285.32	132.202	77.7465	505.158	484.275	36.8232	257.133	110.003	535.608	48.6846	36.9307	52.446	104.062	60.6101	67.5515
neg_3601	Epimedin B	45	63	34.5815	C38H48O19	853.305	2.30312	--	--	LMPK12112011	Polyketides [PK]	Flavonoids [PK12]	Flavones and Flavonols [PK1211]	HMDB0251854	--	Organic compounds	Phenylpropanoids and polyketides	Flavonoids	Flavonoid glycosides	643.613	159.071	137.314	173.665	40.2896	396.225	393.634	283.969	325.71	499.142	356.792	87.1348	63.6204	165.981	94.2955	261.597	590.421	142.984	230.211	33.5504
neg_3605	Lividamine	42.7	46.2	20.2146	C12H25N3O6	328.155	2.31027	C21255	Neomycin, kanamycin and gentamicin biosynthesis(ko00524);;Biosynthesis of secondary metabolites(ko01110)	--	--	--	--	--	--	--	--	--	--	33.3038	53.218	87.7036	154.768	47.1918	122.431	283.673	242.268	83.8765	66.4851	36.2386	23.5319	67.2601	42.5916	360.142	330.828	106.792	153.808	349.192	142.018
neg_3608	Prostaglandin I2	49.7	70	4.8177	C20H32O5	387.196	2.31027	C01312	Arachidonic acid metabolism(ko00590);;Metabolic pathways(ko01100)	LMFA03010087	Fatty Acyls [FA]	Eicosanoids [FA03]	Prostaglandins [FA0301]	HMDB0001335	35121-78-9	Organic compounds	Lipids and lipid-like molecules	Fatty Acyls	Eicosanoids	65.9101	208.944	195.489	404.468	58.0623	565.542	960.332	943.808	119.729	435.393	51.5355	103.922	47.0478	93.1875	680.503	1481.47	92.8345	979.903	1233.87	904.401
neg_3621	3-Methylbutyl 6-O-(alpha-L-arabinopyranosyl)-beta-D-glucopyranoside	40.4	67.2	-24.2394	C16H30O10	763.342	2.33887	--	--	--	--	--	--	--	--	--	--	--	--	211.93	112.991	148.655	266.078	120.366	364.391	445.903	409.514	196.571	141.857	41.7336	92.3907	57.3255	42.0881	314.081	349.853	8.69899	200.745	299.361	125.856
neg_3623	Tropate	41.9	23.1	2.92304	C9H10O3	165.056	2.34602	C01456	Tropane, piperidine and pyridine alkaloid biosynthesis(ko00960);;Biosynthesis of secondary metabolites(ko01110)	--	--	--	--	HMDB0062590	552-63-6	Organic compounds	Organic acids and derivatives	Hydroxy acids and derivatives	Beta hydroxy acids and derivatives	26.2649	2.61963	12.1541	0.415703	5.1309	5.37346	1.23e-12	0.123461	4.87067	74.6147	36.5764	22.0291	48.7096	37.3394	0.0791745	0.0222203	0.103363	0.00179794	2.24166	0.173227
neg_3628	Androsin	47.3	42.1	2.48519	C15H20O8	327.109	2.34602	--	--	--	--	--	--	--	--	--	--	--	--	2605.18	534.269	1384.82	407.676	687.6	238.912	194.304	231.476	560.306	2946.45	3304.75	1510.59	3296.63	2310.36	340.121	208.462	537.642	286.26	288.503	443.4
neg_3631	12-Hydroxymyricanone	40.2	51.3	26.1028	C21H24O6	393.142	2.35317	--	--	--	--	--	--	HMDB0041416	--	Organic compounds	Phenylpropanoids and polyketides	Diarylheptanoids	Cyclic diarylheptanoids	2621.08	3715.44	3992.42	4993.86	1906.16	5056.38	5191.12	5552.86	2597.37	4089.15	2847.73	4079.03	1628.26	2509.81	2582.27	6612.3	4464.11	6342.83	9740.89	3470.64
neg_3632	Licochalcone D	45.5	41.4	-6.0762	C21H22O5	399.143	2.34602	--	--	LMPK12120425	Polyketides [PK]	Flavonoids [PK12]	Chalcones and dihydrochalcones [PK1212]	--	--	--	--	--	--	328.752	141.659	119.369	109.885	74.3022	99.8481	167.687	112.264	44.2143	28.7313	52.7186	143.447	102.662	53.423	127.674	184.453	24.0137	121.339	131.266	108.522
neg_3634	3alpha-dihydrocadambine	47.6	71.6	9.80186	C27H34N2O10	545.219	2.35317	--	--	--	--	--	--	--	--	--	--	--	--	920.565	1244.29	1321.77	1832.91	1047.42	2502.11	3276.89	2946.55	1257.71	1605.31	1048.76	1717.76	799.643	983.355	2151.06	3151.08	1135.89	2828.35	3182.93	2556.1
neg_3635	Apigenin-7-O-neohesperidoside (Rhoifolin)	43.4	57.2	36.7671	C27H30O14	577.178	2.35317	--	--	--	--	--	--	--	--	--	--	--	--	20116.5	6175.33	10458.9	6586.31	18244.2	5130.81	7054.71	7144.17	20650.7	8185.97	2138.95	5234.57	8812.8	4893	4299.95	3287.46	2991.12	4098.94	3607.27	3388.06
neg_3642	cis-1,2-Dihydrobenzene-1,2-diol	40	33.1	29.0062	C6H8O2	133.03	2.36032	C04091	Metabolic pathways(ko01100)	--	--	--	--	--	--	--	--	--	--	79.0847	77.8529	46.6892	57.799	74.1047	44.9886	39.7281	39.4623	113.737	81.7239	16.3237	43.8682	35.949	23.5768	15.4528	41.1602	43.0494	43.5122	49.4113	48.3866
neg_3644	ferulic acid	44.7	38.6	10.2049	C10H10O4	193.053	2.36032	C01494	Phenylpropanoid biosynthesis(ko00940);;Metabolic pathways(ko01100);;Biosynthesis of secondary metabolites(ko01110)	--	--	--	--	HMDB0000954	537-98-4	Organic compounds	Phenylpropanoids and polyketides	Cinnamic acids and derivatives	Hydroxycinnamic acids and derivatives	883.218	1016.62	402.314	697.268	913.929	444.622	320.928	356.971	1389.25	660.014	337.558	504.615	494.93	312.705	244.497	156.436	413.198	212.338	247.549	155.173
neg_3645	Albendazole	45.6	32.3	-0.833315	C12H15N3O2S	300.058	2.36032	C01779	--	--	--	--	--	HMDB0014659	54965-21-8	Organic compounds	Organoheterocyclic compounds	Benzimidazoles	2-benzimidazolylcarbamic acid esters	804.286	246.264	167.878	243.615	656.144	357.992	388.62	406.305	1146.76	1340.9	827.795	700.458	677.093	568.161	355.792	317.185	1054.21	808.77	409.669	837.192
neg_3649	5'-O-methylthymidine	45.9	48.2	-3.43354	C11H16N2O5	557.208	2.36032	--	--	--	--	--	--	HMDB0246885	--	Organic compounds	Nucleosides, nucleotides, and analogues	Pyrimidine nucleosides	Pyrimidine 2'-deoxyribonucleosides	4565.71	1336.61	2496.03	1376.32	616.133	1036.27	1587.18	931.911	969.034	1107.44	413.392	845.78	603.484	819.288	622.444	978.393	1058.6	762.023	930.373	792.973
neg_3651	Maytansine	46.8	81.2	-30.6999	C34H46ClN3O10	726.235	2.36032	C10606	--	LMPK04000017	Polyketides [PK]	Macrolides and lactone polyketides [PK04]	--	HMDB0254356	--	Organic compounds	Phenylpropanoids and polyketides	Macrolactams	--	1468.84	1042.8	981.25	719.753	765.077	862.609	904.572	707.119	2939.31	1314.21	1067.41	664.027	792.08	571.235	580.973	937.358	1674.26	1406.36	875.17	1441.07
neg_3656	Astragaloside III	49.9	64.7	-11.3166	C41H68O14	819.421	2.36032	C08924	--	--	--	--	--	HMDB0248674	--	Organic compounds	Lipids and lipid-like molecules	Steroids and steroid derivatives	Steroidal glycosides	933.23	2519.61	839.511	1934.48	436.5	6432.98	12087.6	9866.3	1590.7	2791.77	341.434	715.515	1363.94	1214.58	14793.7	7039.72	985.59	1925.79	5124.06	880.036
neg_3661	N-Acetyl-DL-methionine	41	17.9	9.34545	C7H13NO3S	190.056	2.3739	--	--	--	--	--	--	--	--	--	--	--	--	717.277	544.678	714.64	979.321	443.459	1348.81	1460.74	1104.26	483.922	1054.33	369.696	605.002	619.511	525.037	666.798	1470.46	704.68	1204.11	1418.23	1039.31
neg_3663	Lysyl-Asparagine	45.9	46.1	10.9914	C10H20N4O4	281.126	2.3739	--	--	--	--	--	--	HMDB0028946	19908-06-6	Organic compounds	Organic acids and derivatives	Carboxylic acids and derivatives	Amino acids, peptides, and analogues	137.178	489.722	434.374	560.079	298.009	309.907	102.598	305.336	546.278	616.037	246.784	454.494	311.774	584.28	134.473	18.4223	167.407	70.6804	54.1172	279.233
neg_3666	L-Methionine Sulfoximine	40.7	8.76	0.196141	C5H12N2O3S	419.128	2.3739	C03510	--	--	--	--	--	HMDB0029430	1982-67-8	Organic compounds	Organic acids and derivatives	Carboxylic acids and derivatives	Amino acids, peptides, and analogues	119.999	41.7911	71.725	73.8526	29.4194	225.475	197.468	278.178	62.2928	267.62	31.2136	58.3769	40.6373	114.246	96.0178	176.432	52.8968	163.315	341	266.935
neg_3667	O-Demethyl-N-demethyl-staurosporine	44	43.7	-15.7201	C26H22N4O3	473.132	2.3739	C21128	Metabolic pathways(ko01100);;Biosynthesis of secondary metabolites(ko01110)	--	--	--	--	--	--	--	--	--	--	478.634	257.992	231.864	162.919	273.207	138.726	44.0436	44.5315	397.912	437.209	1043.21	472.713	436.684	449.556	234.622	52.8977	756.019	124.308	136.623	226.502
neg_3669	Liquiritin apioside	46.9	52.7	-6.5451	C26H30O13	595.172	2.3739	--	--	--	--	--	--	HMDB0037491	74639-14-8	Organic compounds	Phenylpropanoids and polyketides	Flavonoids	Flavonoid glycosides	219.655	556.779	578.705	522.084	288.423	300.561	371.177	396.276	345.462	412.516	187.427	541.031	348.798	401.946	450.388	285.786	190.001	594.087	411.923	558.647
neg_3678	Pentazocine	46	45.9	-12.8056	C19H27NO	330.204	2.38105	C07421	--	--	--	--	--	HMDB0014790	359-83-1	Organic compounds	Alkaloids and derivatives	6,7-benzomorphans	2,6-dimethyl-3-benzazocines	1.23e-12	24.5297	11.2097	84.447	1.23e-12	180.333	414.562	460.653	51.16	56.3401	1.23e-12	3.31769	1.23e-12	1.23e-12	317.918	385.413	7.32868	193.446	343.439	170.546
neg_3684	L-Isoleucine	41.5	28.8	13.6586	C6H13NO2	130.089	2.3882	C00407	Valine, leucine and isoleucine degradation(ko00280);;Valine, leucine and isoleucine biosynthesis(ko00290);;Cyanoamino acid metabolism(ko00460);;Tropane, piperidine and pyridine alkaloid biosynthesis(ko00960);;Glucosinolate biosynthesis(ko00966);;Aminoacyl-tRNA biosynthesis(ko00970);;Metabolic pathways(ko01100);;Biosynthesis of secondary metabolites(ko01110);;2-Oxocarboxylic acid metabolism(ko0121…	--	--	--	--	HMDB0000172	73-32-5	Organic compounds	Organic acids and derivatives	Carboxylic acids and derivatives	Amino acids, peptides, and analogues	3.85618	23.3649	24.1345	47.9106	11.7645	12.1454	14.7778	12.2528	1.93871	11.0934	1.23e-12	13.8593	11.5126	15.8206	40.8961	17.48	4.62074	10.6386	14.8353	8.42549
neg_3685	Creatine	40.1	19.4	-13.2044	C4H9N3O2	261.128	2.3882	C00300	Glycine, serine and threonine metabolism(ko00260);;Arginine and proline metabolism(ko00330);;Metabolic pathways(ko01100)	--	--	--	--	HMDB0000064	57-00-1	Organic compounds	Organic acids and derivatives	Carboxylic acids and derivatives	Amino acids, peptides, and analogues	109.076	568.445	379.181	911.741	252.517	1416.77	2253.31	2287.29	561.307	1443.45	65.6014	263.706	257.196	251.92	2054.87	1742.07	518.394	848.191	1606.96	1113.83
neg_3694	L-2-Aminoadipate 6-semialdehyde	48.2	55.9	-6.91427	C6H11NO3	180.042	2.4025	C04076	Lysine biosynthesis(ko00300);;Lysine degradation(ko00310);;Tropane, piperidine and pyridine alkaloid biosynthesis(ko00960);;Metabolic pathways(ko01100);;Biosynthesis of secondary metabolites(ko01110);;Biosynthesis of amino acids(ko01230)	--	--	--	--	HMDB0001263	6665-12-09	Organic compounds	Organic acids and derivatives	Carboxylic acids and derivatives	Amino acids, peptides, and analogues	25.5532	16.1748	25.5559	5.50795	25.7312	16.8445	8.82826	6.27671	21.9895	6.2606	11.4545	10.8178	6.1289	4.04582	6.88378	1.23e-12	1.23e-12	1.23e-12	5.78369	1.23e-12
neg_3696	2'-Deoxycytidine	47.9	71.6	-11.853	C9H13N3O4	248.063	2.4025	C00881	Pyrimidine metabolism(ko00240);;Metabolic pathways(ko01100);;Nucleotide metabolism(ko01232);;ABC transporters(ko02010)	--	--	--	--	HMDB0000014	951-77-9	Organic compounds	Nucleosides, nucleotides, and analogues	Pyrimidine nucleosides	Pyrimidine 2'-deoxyribonucleosides	29.3529	36.8941	44.5488	40.4274	26.1894	40.8205	35.0051	16.9257	42.4385	28.213	650.34	112.185	11.0955	207.533	99.0247	16.4367	88.8215	28.049	19.1524	27.6413
neg_3698	L-Homocysteine	40.9	19.3	4.11012	C4H9NO2S	329.086	2.39535	C00155	Cysteine and methionine metabolism(ko00270);;Sulfur metabolism(ko00920);;Metabolic pathways(ko01100);;Biosynthesis of secondary metabolites(ko01110);;Biosynthesis of amino acids(ko01230)	--	--	--	--	HMDB0000742	6027-13-0	Organic compounds	Organic acids and derivatives	Carboxylic acids and derivatives	Amino acids, peptides, and analogues	97.5835	209.328	166.105	189.661	83.3194	114.984	103.921	111.985	27.2182	87.192	137.564	190.88	179.05	278.23	108.971	148.202	91.2086	153.719	179.862	714.072
neg_3701	8-Ethyl-12-methylbacteriochlorophyllide d	46	50.1	7.4628	C33H34MgN4O4	619.242	2.39535	C21431	Porphyrin metabolism(ko00860)	--	--	--	--	--	--	--	--	--	--	18207.8	5776.53	11948.5	10579.9	13173.3	8278.33	13274.8	7583.08	20180.8	8738.7	8180.5	9662.08	12145.2	7623.47	11767.8	7063.47	5970.15	6336.44	7020.44	5160.49
neg_3705	6-(Hydroxymethyl)-7,8-dihydropterin	43.2	45.4	32.9919	C7H9N5O2	230.051	2.40965	C01300	Folate biosynthesis(ko00790);;Metabolic pathways(ko01100);;Biosynthesis of cofactors(ko01240)	--	--	--	--	--	--	--	--	--	--	8.4429	3.72297	25.6964	9.97091	11.7961	37.7585	28.6171	33.3549	31.4216	13.6298	770.751	84.8458	3.78118	170.776	96.2684	9.14271	76.0306	19.6392	4.08509	21.1603
neg_3706	Dehydrohistidyltryptophyldiketopiperazine	48.9	63.9	-12.5242	C17H15N5O2	342.093	2.40965	C22164	Biosynthesis of secondary metabolites(ko01110)	--	--	--	--	--	--	--	--	--	--	1855.03	990.59	1416.23	646.589	2091.54	489.462	497.031	508.509	1752.07	962.731	1001.64	988.981	1296.04	767.225	514.204	262.84	851.857	517.199	381.158	492.141
neg_3709	4-(beta-D-Glucosyloxy)benzoate	41.4	31.7	11.1775	C13H16O8	599.168	2.40965	C03993	Ubiquinone and other terpenoid-quinone biosynthesis(ko00130)	--	--	--	--	--	--	--	--	--	--	362.203	304.942	156.763	84.0006	34.4132	463.898	36.1837	34.9012	59.5106	25.6049	257.761	521.567	121.064	1123.92	23.5554	29.2373	59.35	35.8924	167.998	36.2205
neg_3712	L-Anticapsin	47.4	53.6	10.1235	C9H13NO4	198.079	2.41678	C20941	Metabolic pathways(ko01100);;Biosynthesis of secondary metabolites(ko01110)	--	--	--	--	--	--	--	--	--	--	40.2776	69.8641	122.585	11.8012	117.276	17.6307	13.6723	5.94431	22.1391	1.23e-12	897.808	625.503	40.1287	631.659	94.4239	2.53417	17.9495	1.23e-12	1.23e-12	1.23e-12
neg_3714	Bakuchiol	47.4	49.2	5.62099	C18H24O	277.159	2.42395	--	--	--	--	--	--	HMDB0248849	--	Organic compounds	Lipids and lipid-like molecules	Prenol lipids	Monoterpenoids	41.3914	233.474	19.2775	119.25	1.23e-12	31.6823	38.9522	2.949	1.23e-12	4.39924	1.23e-12	62.3845	69.5588	14.7241	6.69722	1.66498	1.23e-12	4.91187	14.2585	3.13462
neg_3717	N-Benzoyl-(2R,3S)-3-phenylisoserine	42.1	30.5	13.6192	C16H15NO4	306.079	2.42395	--	--	--	--	--	--	--	--	--	--	--	--	288.37	468.03	138.361	55.2303	41.236	1448.15	162.765	304.941	80.4232	236.05	442.721	828.833	83.0184	2600.18	132.712	73.2494	220.059	81.8369	812.945	256.937
neg_3719	Nadolol	45.2	41.2	8.51684	C17H27NO4	330.171	2.41678	--	--	--	--	--	--	HMDB0015334	42200-33-9	Organic compounds	Benzenoids	Tetralins	--	1.23e-12	8.75543	7.80284	55.9224	0.419202	100.623	203.745	203.455	8.90924	29.2524	1.23e-12	2.67194	1.23e-12	1.23e-12	87.2984	224.727	1.23e-12	146.371	244.312	145.369
neg_3722	Thromboxane B2	41.8	43.3	-29.332	C20H34O6	415.223	2.41678	C05963	Arachidonic acid metabolism(ko00590);;Metabolic pathways(ko01100)	LMFA03030002	Fatty Acyls [FA]	Eicosanoids [FA03]	Thromboxanes [FA0303]	HMDB0003252	54397-85-2	Organic compounds	Lipids and lipid-like molecules	Fatty Acyls	Eicosanoids	81.5245	788.417	762.838	1448.31	225.684	2544.35	3847.89	3835.09	165.968	1112.79	42.5681	197.21	135.706	294.194	3356.99	4977.25	101.623	3108.4	3946.39	2530.2
neg_3727	Zedoarondiol	49	50.2	1.84706	C15H24O3	273.148	2.43108	--	--	--	--	--	--	HMDB0036448	98644-24-7	Organic compounds	Lipids and lipid-like molecules	Prenol lipids	Sesquiterpenoids	1.23e-12	36.0718	31.9318	172.525	7.72149	149.826	337.148	276.52	0.651579	80.5402	1.23e-12	23.3034	1.23e-12	9.2667	28.9233	1306.43	13.4767	769.888	1028.91	532.553
neg_3732	Hydroxy-α-sanshool	48.8	50.9	1.64135	C16H25NO2	284.164	2.43825	--	--	LMFA08020326	Fatty Acyls [FA]	Fatty amides [FA08]	N-acyl amines [FA0802]	HMDB0029567	83883-10-7	Organic compounds	Lipids and lipid-like molecules	Fatty Acyls	Fatty amides	72.7773	270.215	300.088	559.686	130.223	577.404	884.799	787.088	179.082	228.486	68.2296	270.018	197.985	189.362	529.665	1210.82	250.056	725.06	980.624	553.256
neg_3737	Canthoside A	47.3	46.6	4.05735	C19H26O12	491.141	2.45253	--	--	--	--	--	--	--	--	--	--	--	--	2904.52	2373.23	2187.92	2183.99	2666.05	1846.63	986.623	1333.25	2814.45	2399.71	5863.45	3973.07	4300.87	3897.98	2110.37	1425.07	3528.66	2437.3	2274.58	6156.58
neg_3738	Gomisin H	48.8	52.3	1.72146	C23H30O7	453.169	2.45253	C17820	--	--	--	--	--	--	--	--	--	--	--	144.878	126.703	89.1242	245.766	88.985	608.751	568.201	530.99	226.775	368.963	325.479	353.237	115.045	355.584	577.981	708.352	371.532	594.732	769.484	473.306
neg_3739	Narcotine hemiacetal	44.5	55.6	-1.26019	C22H25NO7	460.161	2.45253	C20297	Isoquinoline alkaloid biosynthesis(ko00950);;Metabolic pathways(ko01100);;Biosynthesis of secondary metabolites(ko01110)	--	--	--	--	--	--	--	--	--	--	125.765	98.9803	114.391	101.658	63.5887	56.7904	44.5178	45.9424	101.838	99.3023	124.695	125.623	92.8096	109.184	45.8785	51.5721	81.004	58.8023	67.9022	73.7094
neg_3743	Syringaresinol-4'-O-glucoside	42.5	43.4	-22.349	C28H36O13	601.177	2.44538	--	--	--	--	--	--	--	--	--	--	--	--	96.5468	3.42061	1.23e-12	0.00547337	36.7985	567.433	84.4515	1243.35	891.959	1187.75	22.2017	23.2107	173.273	71.4299	0.00506259	12.1559	106.557	7.98117	328.227	252.719
neg_3746	Taccalonolide A	49.1	65	-1.65318	C36H46O14	737.257	2.45253	C08635	--	LMST01160016	Sterol Lipids [ST]	Sterols [ST01]	Withanolides and derivatives [ST0116]	--	--	--	--	--	--	1341.71	804.045	872.264	899.698	617.878	1096.1	1626.77	1135.03	1176.11	928.497	349.494	665.145	630.571	461.272	520.904	1063.06	651.027	730.36	963.953	421.915
neg_3748	Soyasaponin IV	40.5	54	-33.2972	C41H66O13	801.394	2.45253	--	--	--	--	--	--	HMDB0039518	108906-97-4	Organic compounds	Lipids and lipid-like molecules	Prenol lipids	Terpene glycosides	649.952	555.704	530.744	709.415	274.571	1994.66	3096.2	2671.55	612.999	711.08	303.002	275.861	183.826	171.073	1857.15	2464	185.861	1307.82	2163.24	660.541
neg_3755	Betaxolol	48	47.4	-1.03609	C18H29NO3	328.189	2.45968	C06849	--	--	--	--	--	HMDB0014341	63659-18-7	Organic compounds	Benzenoids	Phenols	Tyrosols and derivatives	2.86957	189.969	261.592	419.954	95.8395	591.998	1288.39	1052.07	398.97	227.89	0.040136	49.5867	70.933	86.1142	1224.96	1269.35	255.738	630.242	1258.5	444.61
neg_3760	Myricetin-3-O-arabinoside	40.6	14	7.18956	C20H18O12	495.081	2.45968	--	--	--	--	--	--	--	--	--	--	--	--	1971.67	390.408	504.031	364.067	400.015	143.542	444.435	145.436	1324.92	688.501	481.816	285.31	1407.56	243.527	41.954	133.828	1173.06	173.493	144.363	447.321
neg_3761	Holyrine A	46	58	-15.4012	C26H24N4O3	475.147	2.45968	C21127	Metabolic pathways(ko01100);;Biosynthesis of secondary metabolites(ko01110)	--	--	--	--	--	--	--	--	--	--	558.279	524.05	348.715	431.021	436.56	241.618	335.325	322.199	641.796	563.326	214.967	340.411	250.374	243.713	133.95	279.628	330.079	553.193	366.908	417.373
neg_3765	2-Aminoethylphosphonate	42.6	42	11.0932	C2H8NO3P	124.018	2.474	C03557	Phosphonate and phosphinate metabolism(ko00440);;Metabolic pathways(ko01100);;ABC transporters(ko02010)	--	--	--	--	HMDB0011747	2041-14-7	Organic compounds	Organic acids and derivatives	Organic phosphonic acids and derivatives	Organic phosphonic acids	33.907	16.0267	6.44115	30.2737	2.3003	142.654	127.124	98.6279	160.095	377.335	6.67464	15.8452	22.7026	10.2585	5.55696	68.7659	316.697	565.029	263.786	267.796
neg_3766	3-METHOXYCATECHOL	46	39.5	-4.40433	C7H8O3	139.039	2.474	--	--	--	--	--	--	--	--	--	--	--	--	51.2378	30.3834	27.1083	12.2962	3.75485	239.926	94.8509	101.819	103.052	250.327	65.6131	29.815	1.35729	97.9968	6.21849	67.2586	246.932	367.039	255.453	172.699
neg_3769	gamma-Glutamyltyramine	45.6	36.3	-5.93888	C13H18N2O4	301.094	2.474	C20926	Metabolic pathways(ko01100);;Biosynthesis of cofactors(ko01240)	--	--	--	--	--	--	--	--	--	--	0.506859	23.7218	22.0644	42.9316	56.2907	1403.54	1001.51	867.526	1273.61	3584.53	95.6967	82.5043	20.7192	88.8267	7.67792	720.68	3465.44	5568.85	2593.62	2935.02
neg_377	L-Lysine monohydrochloride	51.5	49.1	10.5539	C6H14N2O2	145.1	0.547933	--	--	--	--	--	--	HMDB0301757	10098-89-2	Organic compounds	Organic acids and derivatives	Carboxylic acids and derivatives	Amino acids, peptides, and analogues	1076.37	911.502	572.593	1157.03	636.966	1078.94	1129.88	1080.31	852.091	901.186	1036.5	1273.41	1340.47	554.091	682.983	988.894	1476.43	943.177	1377.91	841.59
neg_3777	beta-D-Gentiobiosyl crocetin	48.7	66.7	3.23097	C32H44O14	697.273	2.46683	C19869	Biosynthesis of various plant secondary metabolites(ko00999);;Metabolic pathways(ko01100);;Biosynthesis of secondary metabolites(ko01110)	--	--	--	--	--	--	--	--	--	--	308.757	78.0273	147.195	166.674	65.8621	597.971	842.198	610.301	445.688	845.34	23.7553	104.35	38.9293	60.2262	437.381	602.537	247.986	696.291	663.615	361.476
neg_378	N-Alpha-acetyllysine	46.3	54.9	8.80931	C8H16N2O3	187.11	0.547933	--	--	--	--	--	--	HMDB0000446	1946-82-3	Organic compounds	Organic acids and derivatives	Carboxylic acids and derivatives	Amino acids, peptides, and analogues	45.1658	17.4899	24.585	23.5698	17.7344	16.152	15.4837	21.2277	11.0027	10.2378	31.4881	27.3945	49.5002	15.5354	17.1844	7.17554	25.0456	7.29103	19.6642	2.74553
neg_3782	L-1-Pyrroline-3-hydroxy-5-carboxylate	44.7	43.7	13.3926	C5H7NO3	128.037	2.48113	C04281	Arginine and proline metabolism(ko00330);;Metabolic pathways(ko01100)	--	--	--	--	HMDB0001369	22573-88-2	Organic compounds	Organic acids and derivatives	Carboxylic acids and derivatives	Amino acids, peptides, and analogues	59.1135	45.0867	55.5067	34.5158	39.5469	49.8622	36.3274	40.4794	38.3923	41.462	51.038	60.9275	27.5329	56.5891	27.5254	26.0989	44.9846	26.7395	33.3798	30.5803
neg_3783	4-Hydroxybenzoic acid	53.5	78.6	11.8658	C7H6O3	137.026	2.48113	C00156	Ubiquinone and other terpenoid-quinone biosynthesis(ko00130);;Folate biosynthesis(ko00790);;Metabolic pathways(ko01100);;Biosynthesis of secondary metabolites(ko01110);;Biosynthesis of cofactors(ko01240)	--	--	--	--	HMDB0000500	99-96-7	Organic compounds	Benzenoids	Benzene and substituted derivatives	Benzoic acids and derivatives	7017.99	3220.8	2264.88	949.033	622.026	20606.1	3111.61	6401.59	2099.48	4340.52	8273.1	3883.55	458.824	14370.1	264.172	2667.85	4442.83	3153.52	14230.4	1821.85
neg_380	Pyridoxamine	45.1	30.3	-1.50779	C8H12N2O2	213.088	0.547933	C00534	Vitamin B6 metabolism(ko00750);;Metabolic pathways(ko01100)	--	--	--	--	HMDB0001431	85-87-0	Organic compounds	Organoheterocyclic compounds	Pyridines and derivatives	Pyridoxamines	292.415	217.326	148.836	281.284	184.58	189.567	199.753	188.251	259.617	255.526	293.605	215.278	413.111	138.996	262.098	275.578	591.08	211.528	249.123	370.959
neg_3802	Macrozamin	46.9	53.1	12.4322	C13H24N2O11	429.141	2.48828	C08504	--	--	--	--	--	--	--	--	--	--	--	1198.98	720.269	428.668	394.464	339.314	39.6119	4.86662	0.860672	277.493	56.1523	93.0268	239.058	551.022	278.329	31.6569	73.4379	1.23e-12	3.04142	31.2382	30.6018
neg_3812	Nicotianamine	42.1	48.6	-10.3058	C12H21N3O6	348.138	2.50258	C05324	Cysteine and methionine metabolism(ko00270);;Biosynthesis of various plant secondary metabolites(ko00999);;Metabolic pathways(ko01100);;Biosynthesis of secondary metabolites(ko01110)	--	--	--	--	HMDB0255025	--	Organic compounds	Organic acids and derivatives	Carboxylic acids and derivatives	Amino acids, peptides, and analogues	33.4893	38.2956	32.9764	66.6512	7.14702	107.047	132.109	131.267	38.3519	64.4794	28.2964	33.1807	43.4523	62.7476	129.102	161.933	66.1699	178.478	229.583	159.77
neg_3813	Myricanone	45.3	54.3	26.8005	C21H24O5	355.165	2.49543	--	--	--	--	--	--	HMDB0030798	32492-74-3	Organic compounds	Phenylpropanoids and polyketides	Flavonoids	Flavones	4252.6	4201.11	8636.39	5990.12	3123.87	6702.93	4561.6	5516.07	8360.3	11504.2	2820.91	4579.59	6690.41	3810.63	5341.81	5199.39	4512.88	4890.91	7721.7	11990.4
neg_3816	Soyasaponin Bb	51.9	77.2	3.41237	C48H78O18	963.497	2.49543	--	--	--	--	--	--	HMDB0034649	51330-27-9	Organic compounds	Lipids and lipid-like molecules	Prenol lipids	Terpene glycosides	90.9967	377.125	727.574	304.076	52.174	134.447	188.644	150.615	1.23e-12	386.278	1.23e-12	430.112	161.961	254.234	447.034	113.166	1.23e-12	42.07	74.9256	2.05054
neg_3821	Ethyl(1-hydroxy-4-oxocyclohexa-2,5-dien-1-yl)acetate	46	45.1	6.89636	C10H12O4	195.068	2.51688	--	--	--	--	--	--	--	--	--	--	--	--	83.4678	69.8848	45.1962	129.96	18.4058	21.9328	13.171	2.64608	57.3672	68.995	306.719	110.477	178.79	169.534	91.3939	1.50437	94.1401	5.95272	10.7199	0.0872596
neg_3822	4,8-Dihydroxyquinoline	44.6	38.1	13.5806	C9H7NO2	206.048	2.52403	C05637	Tryptophan metabolism(ko00380)	--	--	--	--	HMDB0060289	--	Organic compounds	Organoheterocyclic compounds	Quinolines and derivatives	Quinolones and derivatives	20.7254	38.8383	31.3741	39.4162	51.5766	30.2083	13.7142	15.0545	75.996	155.849	457.827	171.208	113.365	93.8031	131.196	83.8411	165.478	174.943	265.213	182.697
neg_3824	4-(3-Methylbut-2-enyl)-L-tryptophan	48.2	57.8	-10.6677	C16H20N2O2	293.124	2.52403	C04290	Indole alkaloid biosynthesis(ko00901);;Metabolic pathways(ko01100);;Biosynthesis of secondary metabolites(ko01110)	--	--	--	--	--	--	--	--	--	--	3253.91	1682.93	3879.23	1972.23	2604.15	2352.46	3769.65	1708.19	2403.5	2016	4309.9	4047.56	2838.47	2928.86	1547.75	2389.43	3904.15	2111.68	2529.3	2306.11
neg_3825	1-epi-Valienol 7-phosphate	40.8	24.1	14.0535	C7H13O8P	301.037	2.52403	C21205	Metabolic pathways(ko01100);;Biosynthesis of secondary metabolites(ko01110)	--	--	--	--	--	--	--	--	--	--	6.45223	13.8344	21.28	51.0809	38.8404	1.23e-12	97.8016	79.7443	292.641	41.7872	6.47446	51.2859	52.9606	57.6562	7.56461	115.996	361.038	146.71	113.156	498.943
neg_3832	7-Methylthioheptyl-desulfoglucosinolate	47.7	54.6	-8.07543	C15H29NO6S2	418.11	2.52403	C21650	Glucosinolate biosynthesis(ko00966)	--	--	--	--	--	--	--	--	--	--	901.591	493.109	472.541	839.029	743.215	698.416	686.413	606.821	1861	734.201	933.42	665.7	721.116	440.815	646.253	504.484	487.476	663.005	701.71	762.006
neg_3836	Harringtonine	46.7	59.4	-3.90314	C28H37NO9	566.214	2.52403	C10597	--	--	--	--	--	HMDB0253054	--	Organic compounds	Alkaloids and derivatives	Cephalotaxus alkaloids	--	660.895	256.943	347.144	427.043	196.593	1094.67	848.548	669.773	250.737	307.827	105.061	220.774	148.982	200.052	535.674	613.364	149.739	395.521	555.55	229.619
neg_3846	N-Acetyl-L-phenylalanine	43	38.6	10.6444	C11H13NO3	252.09	2.53118	C03519	Phenylalanine metabolism(ko00360);;Metabolic pathways(ko01100)	--	--	--	--	HMDB0000512	2018-61-3	Organic compounds	Organic acids and derivatives	Carboxylic acids and derivatives	Amino acids, peptides, and analogues	98.4439	41.2987	134.982	43.049	82.6572	104.713	84.125	81.1706	152.53	432.611	71.0548	70.109	17.0804	88.9014	10.328	173.872	470.343	361.713	160.557	616.525
neg_385	Histidinyl-Threonine	46	44.5	6.46587	C10H16N4O4	255.112	0.547933	--	--	--	--	--	--	HMDB0028895	142879-28-5	Organic compounds	Organic acids and derivatives	Carboxylic acids and derivatives	Amino acids, peptides, and analogues	205.276	101.236	114.449	147.586	60.9229	114.369	117.904	152.263	50.8626	65.5131	81.7075	85.8745	270.443	60.2239	102.675	106.46	105.037	118.235	126.189	73.4769
neg_3854	Dihydrokaempferol-3-O-glucoside	41.4	30.5	6.66996	C21H22O11	495.163	2.53118	--	--	--	--	--	--	--	--	--	--	--	--	263.809	312.145	127.312	329.908	110.975	205.814	199.587	185.733	308.811	246.51	339.259	246.732	309.095	434.635	278.161	213.927	273.557	314.289	236.28	285.135
neg_3857	dTDP-4-dimethylamino-4,6-dideoxy-5-C-methyl-D-allose	43.7	30	1.49419	C19H33N3O14P2	624.114	2.53118	C11447	Polyketide sugar unit biosynthesis(ko00523);;Biosynthesis of secondary metabolites(ko01110)	--	--	--	--	--	--	--	--	--	--	0.579679	2.19759	1.86319	0.460425	2.33898	71.5886	11.7572	74.2877	192.289	329.011	2.27703	6.50454	0.0159214	1.23e-12	1.23e-12	35.3512	161.479	251.361	102.598	371.27
neg_3860	N-Acetyl-L-leucine	40.9	24.2	12.2268	C8H15NO3	172.1	2.53833	C02710	--	--	--	--	--	HMDB0011756	1188-21-2	Organic compounds	Organic acids and derivatives	Carboxylic acids and derivatives	Amino acids, peptides, and analogues	121.002	48.3761	172.227	80.4206	97.8444	64.3957	52.5434	109.077	121.562	42.6379	261.52	95.6819	177.469	160.32	110.811	95.7312	202.903	109.714	70.1488	167.25
neg_3861	3,4-methylenedioxy cinnamyl alcohol	43	45.9	8.90809	C10H10O3	223.063	2.53833	--	--	--	--	--	--	--	--	--	--	--	--	5.81137	66.9384	60.3205	25.9536	26.492	198.687	63.7743	66.8833	10.8054	116.895	36.1532	86.9317	16.613	102.56	7.05055	5.88426	3.51124	7.41248	177.711	19.3744
neg_3868	Garcinone D	45.3	47.6	-3.87682	C24H28O7	463.151	2.53833	--	--	--	--	--	--	HMDB0033332	107390-08-9	Organic compounds	Organoheterocyclic compounds	Benzopyrans	1-benzopyrans	610.657	416.437	299.857	517.695	173.269	1245.64	1269.28	1317.65	1182.44	1667.56	319.215	342.333	578.849	593.162	989.742	1190.77	1288.85	1530.21	1597.84	1245.91
neg_3870	Dihydrostreptomycin 6-phosphate	49.9	79	2.17542	C21H42N7O15P	684.224	2.53833	C01221	Metabolic pathways(ko01100);;Biosynthesis of secondary metabolites(ko01110)	--	--	--	--	--	--	--	--	--	--	439.109	225.455	405.207	350.777	350.54	134.377	183.064	143.485	521.924	133.848	206.32	252.449	207.903	128.975	104.271	133.106	74.3639	230.214	226.992	99.3475
neg_3872	5-Methylthio-D-ribose	50.2	68.9	-5.379	C6H12O4S	179.037	2.55263	C03089	Cysteine and methionine metabolism(ko00270);;Metabolic pathways(ko01100)	--	--	--	--	HMDB0001087	624740-12-1	Organic compounds	Organic oxygen compounds	Organooxygen compounds	Carbohydrates and carbohydrate conjugates	11.0298	41.9091	13.8524	16.4253	17.4538	32.0762	20.9075	21.0797	143.571	72.0661	1.85598	36.3495	5.0799	34.4544	4.6593	26.3411	16.2716	42.946	29.2601	39.1021
neg_3874	N-Acetylserotonin	53.5	75.3	-5.86421	C12H14N2O2	253.074	2.55263	C00978	Tryptophan metabolism(ko00380);;Metabolic pathways(ko01100);;Biosynthesis of secondary metabolites(ko01110)	--	--	--	--	HMDB0001238	1210-83-9	Organic compounds	Organoheterocyclic compounds	Indoles and derivatives	Hydroxyindoles	4674.57	7052.6	3811.73	2203.23	12266.4	2765.44	5952.29	3232.87	69742.5	33502	2412.34	7040.81	7170.46	6498.71	3585.12	3599.64	11300.3	9580.86	2819.43	8110.72
neg_3877	2-Heptyl-3-hydroxy-quinolone	43.1	25.9	-5.46974	C16H21NO2	258.149	2.5455	C11848	Biosynthesis of secondary metabolites(ko01110)	--	--	--	--	--	--	--	--	--	--	1.23e-12	1.23e-12	4.4922	1.23e-12	1.23e-12	29.9535	61.448	38.0563	1.23e-12	7.48812	1.23e-12	11.1223	1.23e-12	7.43827	5.94411	130.655	1.23e-12	33.7442	58.8094	8.99993
neg_3887	Eupalinolide A	47.9	64.1	-12.0604	C24H30O9	483.158	2.5455	--	--	--	--	--	--	--	--	--	--	--	--	44.2207	138.692	88.1069	66.418	35.866	311.501	131.828	302.647	268.991	475.452	127.484	767.935	56.38	470.268	94.824	198.466	396.154	401.678	248.257	455.814
neg_3899	RU-0211	45.8	52.4	4.22395	C20H32F2O5	425.193	2.55978	C13707	--	--	--	--	--	HMDB0015180	136790-76-6	Organic compounds	Lipids and lipid-like molecules	Fatty Acyls	Eicosanoids	752.925	1956.48	1205.98	2731.44	805.297	1910.96	2857.43	2528.73	547.699	1166.66	587.064	1059.55	935.002	973.785	2567.41	2865.6	619.351	1891.77	2528.37	1080.49
neg_3911	Asperulosidic acid	48.8	54.3	1.82016	C18H24O12	453.102	2.57408	--	--	--	--	--	--	HMDB0248668	--	Organic compounds	Lipids and lipid-like molecules	Prenol lipids	Terpene glycosides	433.817	187.014	276.611	166.151	194.036	132.539	35.2926	71.0819	428.199	392.575	68.0227	189.932	395.144	205.791	199.435	2.9522	167.353	76.7983	55.9021	83.9026
neg_3912	(1R)-1,4,5,10-Tetrahydrophenazine-1-carboxylate	44.9	45.5	16.136	C13H12N2O2	455.18	2.57408	C21413	Biosynthesis of secondary metabolites(ko01110)	--	--	--	--	--	--	--	--	--	--	1068.03	426.535	1710.9	565.11	711.677	376.971	548.831	435.185	636.819	179.391	359.56	721.078	614.828	398.118	681.589	380.633	192.113	189.177	411.86	67.5402
neg_3913	Dihydrofolate	47.6	50.6	-7.41848	C19H21N7O6	478.121	2.57408	C00415	One carbon pool by folate(ko00670);;Folate biosynthesis(ko00790);;Metabolic pathways(ko01100);;Biosynthesis of cofactors(ko01240)	--	--	--	--	HMDB0001056	4033-27-6	Organic compounds	Organic acids and derivatives	Carboxylic acids and derivatives	Amino acids, peptides, and analogues	543.787	167.877	257.925	161.664	208.082	32.7805	8.70846	53.0149	214.217	151.37	9.84836	150.78	462.45	155.699	264.276	6.88222	36.9584	25.1576	9.06621	3.83945
neg_3927	Ala-His	40.1	57.7	30.0089	C9H14N4O3	497.225	2.58125	--	--	--	--	--	--	HMDB0028689	3253-17-6	Organic compounds	Organic acids and derivatives	Carboxylic acids and derivatives	Amino acids, peptides, and analogues	260.3	213.229	247.013	256.889	139.89	278.764	422.374	360.883	245.795	196.288	271.193	288.142	217.574	255.508	647.163	367.536	241.876	257.529	362.446	276.702
neg_393	(4aS,10bR)-Noroxomaritidine	42.1	27.9	-12.5777	C16H17NO3	316.116	0.547933	C21405	Isoquinoline alkaloid biosynthesis(ko00950)	--	--	--	--	--	--	--	--	--	--	934.512	2742.3	1800.38	1925.68	2242.04	1401.11	1192.63	1971.22	420.339	391.646	1445.47	3182.74	2203.09	1573.14	1918.47	544.817	868.903	372.882	840.816	235.477
neg_3932	beta2-Tomatine	46.9	62	-21.1705	C44H73NO16	916.473	2.58125	--	--	--	--	--	--	--	--	--	--	--	--	52.8526	454.851	60.8456	248.124	32.9874	1944.31	3637.78	2625.22	231.73	632.524	5.05937	60.2151	70.3197	193.753	4084.01	1726.08	240.194	292.683	1823.27	104.497
neg_3933	N-Phenylacetylglycine	40.4	24.1	9.98161	C10H11NO3	238.074	2.58838	--	--	--	--	--	--	HMDB0000821	500-98-1	Organic compounds	Organic acids and derivatives	Carboxylic acids and derivatives	Amino acids, peptides, and analogues	44.2071	19.6008	7.01345	37.4926	1.23e-12	68.5525	54.0111	32.4696	33.6393	27.876	1.23e-12	1.65908	1.23e-12	2.1896	1.23e-12	11.5267	1.23e-12	31.1964	18.2781	5.42097
neg_3935	1,2-Dehydroreticuline	46.6	62.7	-32.7497	C19H22NO4+	327.137	2.58838	C06167	Isoquinoline alkaloid biosynthesis(ko00950);;Metabolic pathways(ko01100);;Biosynthesis of secondary metabolites(ko01110)	--	--	--	--	--	--	--	--	--	--	1.23e-12	144.171	94.6306	556.226	106.933	507.303	799.09	859.581	254.501	248.711	2.31973	45.1349	91.5703	93.5105	1715.22	871.281	314.603	623.386	792.796	513.58
neg_3937	hydnocarpin	43.6	43	6.66189	C25H20O9	485.088	2.58838	--	--	--	--	--	--	--	--	--	--	--	--	0.0144001	1.23e-12	1.23e-12	1.23e-12	1.23e-12	594.66	1.23e-12	1.23e-12	188.247	358.254	76.4994	14.6535	1.23e-12	10.8089	1.23e-12	1.23e-12	784.425	202.994	16.5044	15.6213
neg_3938	(R)-4-Phosphopantoate	40.3	7.32	0.0530251	C6H13O7P	515.094	2.58838	C18911	Pantothenate and CoA biosynthesis(ko00770);;Metabolic pathways(ko01100);;Biosynthesis of cofactors(ko01240)	--	--	--	--	--	--	--	--	--	--	201.364	174.169	82.7142	49.903	69.8411	816.624	23.1373	371.13	731.887	816.024	348.582	213.201	235.496	81.1894	98.5663	251.126	777.16	586.809	363.744	230.512
neg_3942	4-Methyl-2-oxopentanoate	42.6	30.7	13.451	C6H10O3	129.057	2.60268	C00233	Valine, leucine and isoleucine degradation(ko00280);;Valine, leucine and isoleucine biosynthesis(ko00290);;Glucosinolate biosynthesis(ko00966);;Metabolic pathways(ko01100);;Biosynthesis of secondary metabolites(ko01110);;2-Oxocarboxylic acid metabolism(ko01210);;Biosynthesis of amino acids(ko01230)	--	--	--	--	HMDB0000695	816-66-0	Organic compounds	Organic acids and derivatives	Keto acids and derivatives	Short-chain keto acids and derivatives	98.4633	122.796	231.873	84.8861	366.112	269.014	117.826	166.978	157.955	360.437	14.0973	131.196	152.211	270.867	73.2957	196.022	126.901	158.094	280.103	204.885
neg_3943	Hydroxyphenyllactic acid	40.8	19.5	9.77945	C9H10O4	181.052	2.59553	--	--	--	--	--	--	HMDB0000755	306-23-0	Organic compounds	Phenylpropanoids and polyketides	Phenylpropanoic acids	--	1.23e-12	0.170482	0.000407519	2.31826	1.23e-12	0.0644288	0.0170099	1.23e-12	1.90747	183	360.149	106.818	44.2994	64.7621	29.5015	18.896	133.235	51.2288	4.81987	308.138
neg_3944	(1S,4R)-1-Hydroxy-2-oxolimonene	46.8	42.2	0.707777	C10H16O2	203.085	2.60268	C11937	Limonene and pinene degradation(ko00903);;Biosynthesis of secondary metabolites(ko01110)	LMPR0102090042	Prenol Lipids [PR]	Isoprenoids [PR01]	C10 isoprenoids (monoterpenes) [PR0102]	--	--	--	--	--	--	2.11448	16.5318	14.966	31.6597	11.1122	14.0306	20.6375	17.2577	1.23e-12	13.7132	2.29583	21.3281	10.5978	10.5822	17.8868	27.7073	9.1459	28.5911	27.3839	13.2601
neg_3947	Avermitilol	43.3	24.1	2.24067	C15H26O	243.174	2.59553	C20181	Sesquiterpenoid and triterpenoid biosynthesis(ko00909)	--	--	--	--	--	--	--	--	--	--	42.2609	414.402	462.651	1267.6	319.28	460.096	1012.87	730.781	186.651	372.737	53.6841	157.64	133.803	245.388	467.438	1886.95	322.953	1319.56	1478.85	730.291
neg_3948	.alpha.-Estradiol	46.7	49.3	-13.4673	C18H24O2	293.149	2.59553	--	--	--	--	--	--	--	--	--	--	--	--	1806.08	3375.97	10585.1	4903.63	3689.35	2159.99	8311.59	4332.85	3601	1092.6	2364.32	4785.69	2140.1	3547.69	12147.8	5558.8	4724.16	2320.67	7002.66	2220.48
neg_3952	Oripavine	46.4	45	9.9875	C18H19NO3	318.114	2.60268	C06175	Isoquinoline alkaloid biosynthesis(ko00950);;Metabolic pathways(ko01100);;Biosynthesis of secondary metabolites(ko01110)	--	--	--	--	HMDB0030251	467-04-9	Organic compounds	Alkaloids and derivatives	Morphinans	--	36.3081	172.768	150.77	334.473	98.8891	207.979	303.082	228.425	51.8746	170.398	47.6971	122.457	99.6575	105.667	183.453	528.749	134.938	484.19	512.44	298.259
neg_3953	4'-Hydroxy-5,6,7-trimethoxyflavone	40.3	27.9	7.71343	C18H16O6	349.072	2.59553	C14986	--	--	--	--	--	--	--	--	--	--	--	0.000747295	0.541681	7.53576	0.00418531	3.61125	52.946	77.2663	44.5804	15.1942	19.8017	61.1533	43.5427	25.4034	13.3822	27.6881	83.4835	33.6042	37.0117	77.3181	5.5465
neg_3957	kalanchoside C	45.3	73	6.4924	C30H42O9	545.279	2.60268	--	--	--	--	--	--	--	--	--	--	--	--	125.119	214.383	334.538	242.363	167.07	636.061	776.368	813.707	172.644	349.329	47.6553	256.672	129.764	138.421	541.005	688.478	76.3364	512.942	764.715	560.261
neg_3971	Geranyl ferulate	48.5	61.9	8.74975	C20H26O4	365.155	2.60983	--	--	--	--	--	--	--	--	--	--	--	--	246.36	323.303	286.167	620.745	180.012	824.826	710.165	707.15	276.155	427.565	285.583	246.59	173.687	243.479	871.594	854.113	316.543	1106	2062.05	424.683
neg_3973	7-O-methylaloeresin A	44.2	39.5	1.59627	C29H30O11	589.149	2.60983	--	--	--	--	--	--	--	--	--	--	--	--	280.277	141.327	221.093	127.627	320.409	7.58538	25.6513	36.7438	364.608	359.749	119.643	159.832	173.7	174.602	69.0573	19.1647	172.98	266.015	57.0714	288.166
neg_3975	Cixiophiopogon A	48	85.2	-35.4926	C44H70O18	921.394	2.60983	--	--	--	--	--	--	--	--	--	--	--	--	377.691	102.286	280.269	170.445	99.3593	342.327	668.857	390.933	287.649	162.89	150.235	522.29	148.31	237.041	154.548	284.533	35.2235	178.362	166.365	40.9077
neg_3978	Scytalone	48.1	52	9.81273	C10H10O4	193.053	2.61698	C00779	--	--	--	--	--	--	--	--	--	--	--	95.6078	698.278	403.532	250.265	270.475	420.731	241.642	300.017	315.387	241.499	43.03	298.424	59.0261	163.875	101.73	186.864	87.5432	246.564	284.102	385.273
neg_3979	2-Benzoxazolinone	41	15.9	2.32155	C7H5NO2	315.063	2.62413	--	--	--	--	--	--	HMDB0032931	59-49-4	Organic compounds	Organoheterocyclic compounds	Benzoxazoles	Benzoxazolones	113.242	57.2647	91.8756	50.9977	28.961	44.5545	24.9705	14.2414	221.345	152.83	183.465	175.849	78.9124	151.966	14.8297	29.5564	169.477	170.892	49.9405	178.796
neg_398	3-O-caffeoylshikimic acid	40	22.4	-11.8777	C16H16O8	671.191	0.547933	--	--	--	--	--	--	HMDB0030654	6082-44-6	Organic compounds	Phenylpropanoids and polyketides	Cinnamic acids and derivatives	Hydroxycinnamic acids and derivatives	140.713	189.219	210.25	180.741	168.343	103.172	120.206	156.814	65.4284	75.1157	84.9641	208.207	118.874	98.6996	135.155	72.9889	57.939	74.8764	111.979	71.4653
neg_3982	3-O-Caffeoylquinic acid methyl ester	43.8	23.2	2.362	C17H20O9	367.104	2.61698	--	--	--	--	--	--	--	--	--	--	--	--	1626.91	25789	15740.2	6413.08	10051.1	13869	7091.9	10203	8647.69	7076.21	1328.44	10928.5	1627.33	4600.89	1597.11	6566.39	1941.59	7930.52	9504.27	12006
neg_3997	L-Prolyl-L-Leucine	46.1	43.5	9.06237	C11H20N2O3	227.142	2.63843	--	--	--	--	--	--	--	--	--	--	--	--	1.23e-12	1.23e-12	4.66342	2.4377	1.23e-12	22.8049	5.34282	14.9484	1.23e-12	46.4242	1576.43	506.781	936.383	1282.15	205.125	730.512	1572.44	371.691	471.423	3279.06
neg_3998	Pogostone	46.5	33.3	0.347785	C12H16O4	259.074	2.63843	--	--	--	--	--	--	HMDB0030703	23800-56-8	Organic compounds	Organic oxygen compounds	Organooxygen compounds	Carbonyl compounds	52.0927	127.545	45.3836	137.369	55.1888	69.0915	91.9074	71.4668	33.1012	170.118	422.963	142.828	160.28	58.6634	69.6457	120.604	115.507	201.893	118.398	101.796
neg_3999	(S)-N-Methylcoclaurine	42.6	24.7	0.123911	C18H21NO3	298.145	2.63843	C05176	Isoquinoline alkaloid biosynthesis(ko00950);;Metabolic pathways(ko01100);;Biosynthesis of secondary metabolites(ko01110)	--	--	--	--	HMDB0060319	--	Organic compounds	Organoheterocyclic compounds	Isoquinolines and derivatives	Benzylisoquinolines	0.13095	22.3322	15.395	47.5117	7.22896	45.0093	85.3375	48.6653	29.6485	10.5282	1.23e-12	1.23e-12	6.94022	9.93972	78.955	80.991	27.3478	28.3546	58.5257	21.9359
neg_4000	Val Leu Gln Glu	40.2	18.2	1.0819	C21H37N5O8	486.257	2.63843	--	--	--	--	--	--	--	--	--	--	--	--	93.4685	248.236	341.135	441.064	144.074	692.261	938.267	883.206	205.288	429.314	55.7064	134.363	124.888	185.514	773.568	1111.46	93.9283	781.027	1004.53	630.613
neg_4002	L-Prolyl-L-Phenylalanine	44.5	40.7	12.6422	C14H18N2O3	261.128	2.64558	--	--	--	--	--	--	HMDB0011179	13589-02-1	Organic compounds	Organic acids and derivatives	Carboxylic acids and derivatives	Amino acids, peptides, and analogues	287.677	500.192	385.93	914.746	288.587	906.684	1496.05	1135.28	404.672	492.49	173.272	197.021	390.849	273.053	1724.57	1475.82	541.049	969.01	1275.23	900.251
neg_4004	Leucyl-phenylalanine	46.5	40	-2.15323	C15H22N2O3	313.132	2.65273	--	--	--	--	--	--	HMDB0013243	3063-05-06	Organic compounds	Organic acids and derivatives	Carboxylic acids and derivatives	Amino acids, peptides, and analogues	9.93273	32.4533	15.2903	61.0106	30.0219	4.50345	16.1014	32.8915	8.25464	30.1523	37.2625	153.192	25.8303	54.8198	56.4636	84.5589	23.9734	109.597	59.7363	95.106
neg_4007	Estradiol valerate	45.6	46.7	3.79833	C23H32O3	401.235	2.64558	C12859	--	LMST02010039	Sterol Lipids [ST]	Steroids [ST02]	C18 steroids (estrogens) and derivatives [ST0201]	HMDB0251966	--	Organic compounds	Lipids and lipid-like molecules	Steroids and steroid derivatives	Steroid esters	28.2931	137.082	146.47	264.653	56.2621	342.558	867.213	729.339	444.516	210.232	13.1505	38.7672	34.8466	99.5004	1559.68	1106.75	208.198	403.099	1238.55	337.447
neg_4011	Guanidinoproclavaminic acid	41.1	49.8	26.3773	C9H16N4O4	533.245	2.64558	C06657	Metabolic pathways(ko01100);;Biosynthesis of secondary metabolites(ko01110)	--	--	--	--	--	--	--	--	--	--	264.3	172.454	229.506	245.073	182.263	486.161	488.108	505.847	304.165	358.546	224.605	286.037	228.086	194.171	363.029	839.891	499.022	786.907	817.246	565.672
neg_4014	Citrusin B	41.7	29.3	0.889452	C27H36O13	603.185	2.64558	--	--	--	--	--	--	HMDB0039231	105279-10-5	Organic compounds	Lignans, neolignans and related compounds	Lignan glycosides	--	248.817	218.106	147.429	185.964	229.507	36.7921	52.0631	44.7194	221.068	225.065	46.8339	207.769	118.051	209.073	59.5858	37.3848	126.764	82.9876	57.2774	105.087
neg_4016	N-Acetylneuraminic acid	45.8	48.3	2.40396	C11H19NO9	663.212	2.65273	C00270	Amino sugar and nucleotide sugar metabolism(ko00520);;Metabolic pathways(ko01100);;Biosynthesis of nucleotide sugars(ko01250)	--	--	--	--	HMDB0000230	19342-33-7	Organic compounds	Organic oxygen compounds	Organooxygen compounds	Carbohydrates and carbohydrate conjugates	874.839	750.754	639.406	841.992	444.259	660.412	663.554	686.51	882.766	859.087	283.899	1433.17	390.58	704.167	755.452	665.16	340.225	847.598	569.395	621.783
neg_4024	2-Methyleneglutarate	44	40.5	14.9111	C6H8O4	165.019	2.65988	C02930	Nicotinate and nicotinamide metabolism(ko00760)	--	--	--	--	HMDB0000422	617-62-9	Organic compounds	Lipids and lipid-like molecules	Fatty Acyls	Fatty acids and conjugates	285.387	224.349	236.586	234.184	207.156	110.753	112.856	101.135	143.403	157.516	170.545	197.867	166.538	131.671	213.575	134.679	170.422	159.67	144.12	228.931
neg_4026	Tridecanoylglycine	47.9	50.4	1.25659	C15H29NO3	306.184	2.65988	--	--	--	--	--	--	HMDB0013317	--	Organic compounds	Organic acids and derivatives	Carboxylic acids and derivatives	Amino acids, peptides, and analogues	16.5725	24.7693	23.1557	51.9569	2.52094	20.443	70.4616	61.2608	10.3194	2.21736	1.23e-12	1.23e-12	50.7559	1.23e-12	80.8548	32.7029	2.7569	36.2145	37.9469	31.5074
neg_4027	AM-580	41.5	24.6	-7.22749	C22H25NO3	350.174	2.65988	--	--	--	--	--	--	HMDB0248270	--	Organic compounds	Benzenoids	Benzene and substituted derivatives	Anilides	132.171	224.094	317.597	414.069	221.61	614.789	1173.43	1024.91	523.039	383.226	205.748	154.754	203.064	263.421	1507.66	1062.15	522.864	491.878	978.559	581.854
neg_4029	3''-Amino-3''-deoxygentamicin A2	46.5	61.3	9.21619	C17H34N4O10	489.201	2.65988	C21266	Neomycin, kanamycin and gentamicin biosynthesis(ko00524);;Biosynthesis of secondary metabolites(ko01110)	--	--	--	--	--	--	--	--	--	--	215.962	269.517	270.005	374.712	219.825	491.997	666.213	654.143	235.526	330.806	125.473	197.88	215.989	185.921	879.709	709.673	240.873	601.089	772.117	596.887
neg_4030	6-O-p-Methoxycinnamoylcatalpol	44.3	37.5	12.8483	C25H30O12	557.15	2.65988	--	--	--	--	--	--	--	--	--	--	--	--	417.595	225.694	160.738	191.121	326.769	1456.36	88.6174	357.632	836.145	510.18	199.653	357.258	579.018	294.686	177.629	570.052	1140.16	420.256	204.344	1251.4
neg_4035	2-Propylmalic Acid	41.4	24.7	9.17071	C7H12O5	397.115	2.67418	C05994	Pyruvate metabolism(ko00620)	--	--	--	--	--	--	--	--	--	--	19.9746	109.792	59.3003	41.4951	49.0165	270.838	66.4974	191.177	92.6899	123.802	18.0652	62.2675	3.01664	127.245	26.8419	141.891	54.2961	125.433	140.237	257.72
neg_4043	Gly Leu Phe	40.1	7.16	4.74466	C17H25N3O4	334.179	2.66702	--	--	--	--	--	--	--	--	--	--	--	--	4.14314	99.3918	69.0123	408.885	32.4638	219.733	687.809	667.893	737.875	78.5769	0.0374234	8.83681	57.9445	64.7923	3920.94	803.879	395.337	220.573	593.849	157.354
neg_4044	16-Methoxytabersonine	41.5	25.5	-0.769568	C22H26N2O3	387.169	2.66702	C11675	Indole alkaloid biosynthesis(ko00901);;Metabolic pathways(ko01100);;Biosynthesis of secondary metabolites(ko01110)	--	--	--	--	--	--	--	--	--	--	115.695	223.424	113.969	270.645	55.8516	249.761	379.367	305.14	134.574	300.753	146.221	181.682	132.03	159.258	289.751	486.346	191.916	316.869	461.376	334.198
neg_4048	Terpentedienyl diphosphate	41.3	46.9	-45.3679	C20H36O7P2	449.166	2.67418	C19815	Metabolic pathways(ko01100);;Biosynthesis of secondary metabolites(ko01110)	LMPR0104040003	Prenol Lipids [PR]	Isoprenoids [PR01]	C20 isoprenoids (diterpenes) [PR0104]	--	--	--	--	--	--	558.108	546.906	657.402	607.139	784.852	517.076	342.02	294.746	596.579	510.93	664.815	920.207	789.605	850.053	575.474	367.644	483.061	703.764	388.935	457.398
neg_4064	Cyclopentolate	45.1	45.7	1.79669	C17H25NO3	312.159	2.68133	C06932	--	--	--	--	--	HMDB0015114	512-15-2	Organic compounds	Benzenoids	Benzene and substituted derivatives	--	1.23e-12	14.1416	9.7221	24.3229	0.711912	19.8603	48.2587	35.7265	6.71665	1.23e-12	1.23e-12	1.23e-12	1.23e-12	1.23e-12	41.9434	39.3978	5.73427	12.1148	27.4091	3.33517
neg_4071	3-Hydroxy-5,9,17-trioxo-4,5:9,10-disecoandrosta-1(10),2-dien-4-oate	47.7	47.9	-1.99661	C19H24O6	695.306	2.68133	C04844	Metabolic pathways(ko01100)	LMST02020063	Sterol Lipids [ST]	Steroids [ST02]	C19 steroids (androgens) and derivatives [ST0202]	--	--	--	--	--	--	3.42016	2.83642	10.821	119.623	75.9213	171.152	3435.79	3056.03	1.23e-12	110.641	32.3935	32.2092	3.17775	70.1582	1618.66	25.0397	1.23e-12	1733.21	1814.35	1.23e-12
neg_4073	Bis(glutathionyl)spermine	40.5	27.8	4.96999	C30H56N10O10S2	779.359	2.68133	C16563	Glutathione metabolism(ko00480)	--	--	--	--	--	--	--	--	--	--	32.133	31.5366	41.4354	50.7497	20.166	193.404	342.904	301.327	18.9917	31.9537	16.3194	31.5901	28.141	29.7321	212.231	223.715	3.00923	78.137	159.464	120.635
neg_4078	Pimelate	43.9	40.2	12.4549	C7H12O4	159.068	2.68848	C02656	Biotin metabolism(ko00780);;Metabolic pathways(ko01100);;Biosynthesis of cofactors(ko01240)	--	--	--	--	HMDB0000857	111-16-0	Organic compounds	Lipids and lipid-like molecules	Fatty Acyls	Fatty acids and conjugates	120.165	41.2339	38.4136	39.9957	38.9128	23.5977	24.8417	20.6927	31.7192	29.3328	218.872	69.5989	118.375	107.762	57.9761	55.4017	103.342	76.7936	48.8884	213.241
neg_4080	Histidinyl-Glutamine	45	43.2	10.2479	C11H17N5O4	304.106	2.68848	--	--	--	--	--	--	HMDB0028883	224638-13-5	Organic compounds	Organic acids and derivatives	Carboxylic acids and derivatives	Amino acids, peptides, and analogues	24.3276	16.0655	11.8014	27.0795	1.23e-12	86.3422	68.453	28.7222	16.1979	66.8075	9.22393	24.7767	1.77439	34.8709	1.23e-12	32.4688	14.056	23.6486	40.9706	20.162
neg_4085	daigremontianin	47	65	-6.80601	C26H30O9	521.155	2.68848	--	--	--	--	--	--	--	--	--	--	--	--	222.12	243.301	112.728	111.994	68.4771	19.3106	26.9843	19.4209	161.639	109.188	196.399	222.52	314.068	79.8421	51.7185	28.3639	126.846	94.5111	118.592	52.1258
neg_4086	1,7-Bis-(4-hydroxyphenyl)-2,4,6-heptatrienone	42.6	21.9	-1.68695	C19H16O3	583.212	2.68848	--	--	--	--	--	--	--	--	--	--	--	--	87.3649	15.588	38.8969	32.7046	45.0908	9.08216	7.33756	5.1233	50.2095	50.8872	39.0961	53.6848	50.4976	30.6904	8.79415	12.1773	58.8067	35.0744	16.553	46.1287
neg_4100	CCT018159	41.3	20.6	-11.1815	C20H20N2O4	351.131	2.69563	--	--	--	--	--	--	--	--	--	--	--	--	1120	1195.87	997.095	950.104	791.994	899.054	548.785	616.404	541.353	766.841	972.774	1868.45	1038.73	1658.65	439.236	843.649	887.332	443.833	628.018	1563.82
neg_4102	Coenzyme B	45.5	45.3	7.00383	C11H22NO7PS	388.086	2.69563	C04628	Metabolic pathways(ko01100);;Carbon metabolism(ko01200);;Biosynthesis of cofactors(ko01240)	--	--	--	--	HMDB0304798	--	Organic compounds	Organic acids and derivatives	Carboxylic acids and derivatives	Amino acids, peptides, and analogues	9.09985	62.752	36.2282	57.8369	98.451	31.3492	14.8597	5.34363	217.667	43.2896	665.377	43.451	118.754	61.1301	56.5855	1.25675	189.52	449.849	0.620041	180.19
neg_4106	3-Hydroxyethylchlorophyllide a	42.6	31.7	-6.32192	C35H36MgN4O6	667.214	2.69563	C18154	Porphyrin metabolism(ko00860);;Biosynthesis of secondary metabolites(ko01110)	--	--	--	--	--	--	--	--	--	--	1000.72	738.291	1000.01	1179.37	689.869	687.083	825.472	759.326	1093.8	677.152	500.715	685.728	414.917	570.235	775.849	660.773	407.572	777.824	738.65	855.739
neg_4107	Licorice glycoside B	45.2	56.7	10.8125	C35H36O15	731.182	2.69563	--	--	--	--	--	--	HMDB0031988	--	Organic compounds	Phenylpropanoids and polyketides	Flavonoids	Flavonoid glycosides	190.519	36.3977	76.0925	40.5179	72.1387	485.84	27.7019	133.899	478.499	233.73	21.7249	87.8885	55.4637	37.9191	14.4292	158.269	756.323	208.29	86.2841	563.251
neg_4117	N2-Succinyl-L-arginine	40.8	37.1	-11.3259	C10H18N4O5	593.247	2.70922	C03296	Arginine and proline metabolism(ko00330);;Metabolic pathways(ko01100)	--	--	--	--	--	--	--	--	--	--	2249.63	745.881	1008.66	1189.37	1063.51	1352	1790.43	1544.15	1147.35	1246.95	1254.31	1167.78	1331.96	729.894	1299.55	1394.44	1082.76	1258.73	1154.7	1191.12
neg_4118	D-Urobilinogen	46.3	51.3	-2.0049	C33H42N4O6	611.284	2.70922	C05791	Porphyrin metabolism(ko00860);;Metabolic pathways(ko01100);;Biosynthesis of secondary metabolites(ko01110)	--	--	--	--	HMDB0004158	17208-65-0	Organic compounds	Organoheterocyclic compounds	Tetrapyrroles and derivatives	Bilirubins	22.123	25.0523	44.3679	18.7657	15.711	163.487	242.104	223.35	4.61538	14.0759	12.9419	29.4223	10.1	21.4126	175.317	257.666	6.25635	162.755	252.272	1.3599
neg_4129	Caffeic acid	57.4	93.1	9.87142	C9H8O4	179.037	2.7235	C01197	Phenylpropanoid biosynthesis(ko00940);;Metabolic pathways(ko01100);;Biosynthesis of secondary metabolites(ko01110)	--	--	--	--	HMDB0001964	501-16-6	Organic compounds	Phenylpropanoids and polyketides	Cinnamic acids and derivatives	Hydroxycinnamic acids and derivatives	18453.8	22720	16152	9360.63	50842.5	7558.77	19985.3	8005.99	121571	68734.5	30836.5	22614.9	32680.1	20117.6	18980.8	18030.7	54676.2	36834.5	14509.5	38858.9
neg_4130	p-Cymene	41.3	38.4	-22.7022	C10H14	179.105	2.7235	C06575	Metabolic pathways(ko01100)	LMPR0102090014	Prenol Lipids [PR]	Isoprenoids [PR01]	C10 isoprenoids (monoterpenes) [PR0102]	HMDB0005805	99-87-6	Organic compounds	Lipids and lipid-like molecules	Prenol lipids	Monoterpenoids	1.23e-12	33.0672	1.23e-12	1.23e-12	892.339	1.23e-12	64.2857	1.23e-12	16756.6	4934.71	1.23e-12	1.23e-12	1.23e-12	1.23e-12	1.23e-12	26.6995	286.258	980.117	1.23e-12	224.855
neg_4135	Crenulatin	48.2	55.6	7.23442	C11H20O6	293.126	2.71635	--	--	--	--	--	--	--	--	--	--	--	--	4450.58	2070.21	5512.25	2177.95	2453.7	1226.39	1545.27	1120.87	2731.14	3552.87	15004.6	8363.73	4127.32	3940.74	1695.71	2135.77	6156.29	4213.03	2102.75	2030.88
neg_4142	Deoxyloganin	44.3	57.8	-15.3792	C17H26O9	373.145	2.71635	C06071	Monoterpenoid biosynthesis(ko00902);;Metabolic pathways(ko01100);;Biosynthesis of secondary metabolites(ko01110)	LMPR0102070005	Prenol Lipids [PR]	Isoprenoids [PR01]	C10 isoprenoids (monoterpenes) [PR0102]	HMDB0251007	--	Organic compounds	Lipids and lipid-like molecules	Prenol lipids	Terpene glycosides	31.7435	54.5243	7.5887	137.224	6.30143	110.315	242.828	199.371	187.204	81.5911	29.5296	16.6054	60.4314	57.9877	341.244	213.236	89.415	138.24	196.434	201.327
neg_4146	1-Guanidino-1-deoxy-scyllo-inositol	42.3	22.8	2.47698	C7H15N3O5	441.196	2.7235	C04280	Biosynthesis of secondary metabolites(ko01110)	--	--	--	--	--	--	--	--	--	--	152.377	95.218	143.583	122.861	104.861	161.65	103.398	115.864	61.2472	123.073	148.097	154.724	153.875	134.182	84.7552	90.2059	152.902	145.192	149.714	179.823
neg_4150	UTP	40.9	24.6	-5.99589	C9H15N2O15P3	482.958	2.7235	C00075	Pyrimidine metabolism(ko00240);;Metabolic pathways(ko01100);;Nucleotide metabolism(ko01232);;Biosynthesis of cofactors(ko01240)	--	--	--	--	HMDB0000285	63-39-8	Organic compounds	Nucleosides, nucleotides, and analogues	Pyrimidine nucleotides	Pyrimidine ribonucleotides	1.23e-12	12.0267	1.23e-12	1.23e-12	49.066	1.23e-12	10.3131	1.23e-12	268.29	114.788	9.39387	1.23e-12	1.23e-12	7.93138	1.23e-12	9.8591	52.1953	37.4244	5.13095	44.7146
neg_4161	Octyl gallate	41.8	31.4	-3.03383	C15H22O5	623.306	2.7235	--	--	--	--	--	--	HMDB0033375	1034-01-1	Organic compounds	Benzenoids	Benzene and substituted derivatives	Benzoic acids and derivatives	191.79	310.411	416.597	588.364	439.556	1032.42	1368.06	1813.54	604.068	431.747	263.109	281.409	179.374	281.333	812.769	1160.62	238.384	739.371	984.881	839.366
neg_4168	4-Imidazolone-5-propanoate	44.7	61.6	-48.0831	C6H8N2O3	177.021	2.73065	C03680	Histidine metabolism(ko00340);;Metabolic pathways(ko01100)	--	--	--	--	HMDB0001014	17340-16-8	Organic compounds	Organoheterocyclic compounds	Azoles	Imidazoles	2335.36	595.287	862.252	438.954	486.302	262.425	290.253	383.818	184.856	192.697	239.039	323.996	943.086	277.319	609.637	214.716	303.916	581.25	121.059	952.034
neg_4169	3-Amino-2,3-dideoxy-scyllo-inosose	46	46.4	7.83134	C6H11NO4	182.045	2.73065	C17581	Neomycin, kanamycin and gentamicin biosynthesis(ko00524);;Biosynthesis of secondary metabolites(ko01110)	--	--	--	--	--	--	--	--	--	--	1.23e-12	5.40267	1.23e-12	1.23e-12	12.1838	1.23e-12	6.79468	0.831437	45.5386	31.3486	2.88564	5.09283	1.61296	4.08464	1.23e-12	2.27921	11.5467	12.075	0.616506	14.9953
neg_4170	Pilocarpine	42.6	44.4	24.505	C11H16N2O2	229.101	2.73065	C07474	Biosynthesis of secondary metabolites(ko01110)	--	--	--	--	HMDB0015217	54-71-7	Organic compounds	Alkaloids and derivatives	--	--	42.2381	180.192	154.147	306.982	110.912	15.2106	6.39827	11.517	1.23e-12	21.7474	70.6385	261.021	66.21	149.1	171.708	9.44696	1.23e-12	1.66109	2.67619	8.12573
neg_4175	Val-Trp	40.1	29.3	5.69894	C16H21N3O3	348.158	2.73065	--	--	--	--	--	--	HMDB0029138	24587-37-9	Organic compounds	Organic acids and derivatives	Carboxylic acids and derivatives	Amino acids, peptides, and analogues	17.1509	200.424	186.907	472.561	74.8173	1205.31	2746.26	2064.14	815.816	494.94	9.84712	61.955	69.3226	101.978	1715.93	3218.37	587.705	824.862	1905.97	527.333
neg_4179	6-Hydroxy-4-methylcoumarin	45.9	50	8.50256	C10H8O3	175.042	2.74497	--	--	--	--	--	--	--	--	--	--	--	--	1.23e-12	1.23e-12	1.23e-12	1.23e-12	1.23e-12	31.14	18.6412	19.4005	6.01693	1.23e-12	1.23e-12	1.23e-12	1.23e-12	1.23e-12	1.23e-12	31.6778	99.4884	30.4573	80.5341	54.7673
neg_4182	Cyclo(Tyr-Phe)	45	46.4	-15.3644	C18H18N2O3	355.105	2.74497	--	--	--	--	--	--	--	--	--	--	--	--	1613.69	1294.77	2707.15	1129.31	1272.61	1633.05	1032.47	1273.07	659.299	434.641	503.441	897.236	1054.38	1420.05	1205.15	1314.39	4816.76	1428.77	4460.06	2753.45
neg_4183	5-Amino-6-(1-D-ribitylamino)uracil	47.1	50.4	11.2722	C9H16N4O6	311.079	2.7378	C04732	Riboflavin metabolism(ko00740);;Metabolic pathways(ko01100);;Biosynthesis of secondary metabolites(ko01110);;Biosynthesis of cofactors(ko01240)	--	--	--	--	HMDB0011106	17014-74-3	Organic compounds	Organic oxygen compounds	Organooxygen compounds	Carbohydrates and carbohydrate conjugates	163.722	97.3431	102.184	36.1259	204.387	13.9204	45.9915	15.2242	548.735	352.002	126.795	93.9359	64.8989	51.7495	13.1191	8.55537	115.414	83.1929	1.3757	158.474
neg_4185	Thebaine	46	45.7	9.72584	C19H21NO3	332.13	2.74497	C06173	Isoquinoline alkaloid biosynthesis(ko00950);;Metabolic pathways(ko01100);;Biosynthesis of secondary metabolites(ko01110)	--	--	--	--	--	--	--	--	--	--	1061.23	499.646	633.188	458.841	676.838	526.834	711.236	703.364	974.892	575.741	624.274	876.814	362.577	525.621	581.345	475.961	579.031	715.064	433.809	411.312
neg_4186	Picrocrocin	48.2	70.4	30.2966	C16H26O7	365.147	2.74497	C17055	Biosynthesis of various plant secondary metabolites(ko00999)	--	--	--	--	HMDB0005796	138-55-6	Organic compounds	Organic oxygen compounds	Organooxygen compounds	Carbohydrates and carbohydrate conjugates	2613.17	1015.52	517.069	780.098	449.86	505.364	316.398	440.134	877.847	871.918	1779.92	1265.78	1246.2	802.155	415.74	674.814	1547.31	1558.03	1083.07	1151.44
neg_4189	(3E)-3-[(1R,5R,6S)-5-Hydroxy-7-oxabicyclo[4.1.0]heptan-2-ylidene]-2-oxopropanoate	43.7	22.3	-0.101665	C9H10O5	441.104	2.74497	C21086	Metabolic pathways(ko01100);;Biosynthesis of secondary metabolites(ko01110)	--	--	--	--	--	--	--	--	--	--	71.7766	16.6385	19.9493	25.9549	48.3443	13.6465	12.0056	10.5362	343.033	194.985	88.6955	41.3392	43.8575	47.3227	15.5294	21.4425	208.417	81.5152	24.9452	49.8704
neg_419	Yersiniabactin	44.1	59.1	10.3666	C21H27N3O4S3	516.152	0.547933	C12038	Biosynthesis of secondary metabolites(ko01110)	--	--	--	--	HMDB0259950	--	Organic compounds	Organic acids and derivatives	Carboxylic acids and derivatives	Amino acids, peptides, and analogues	80.3068	185.112	157.551	157.99	210.682	116.278	134.235	158.466	73.0227	80.5655	81.354	130.753	155.693	89.2428	111.904	126.607	96.6567	68.353	152.086	77.73
neg_4191	Methotrexate	48.8	53.1	3.26454	C20H22N8O5	475.147	2.7378	C01937	--	--	--	--	--	HMDB0014703	1959-05-02	Organic compounds	Organic acids and derivatives	Carboxylic acids and derivatives	Amino acids, peptides, and analogues	80.9367	44.3413	29.6213	72.389	54.1637	20.0109	34.9163	17.4773	59.8177	97.6266	37.9418	37.2601	40.9333	59.5376	49.4335	25.6669	51.5748	48.1478	22.7536	50.9392
neg_4192	8-Methoxykynurenate	41.7	21.8	-0.705297	C11H9NO4	497.12	2.74497	C05830	Tryptophan metabolism(ko00380)	--	--	--	--	HMDB0060426	--	Organic compounds	Organoheterocyclic compounds	Quinolines and derivatives	Quinoline carboxylic acids	256.504	604.1	810.242	757.859	823.997	394.94	346.578	266.103	311.226	123.838	472.436	852.418	441.478	518.799	595.525	157.636	150.919	148.089	161.766	215.738
neg_4208	Glycyroside	41.8	38	4.57914	C27H30O13	1123.34	2.7521	--	--	LMPK12050024	Polyketides [PK]	Flavonoids [PK12]	Isoflavonoids [PK1205]	--	--	--	--	--	--	1146.95	201.758	622.018	214.452	302.754	136.988	174.24	446.982	989.93	330.218	1.23e-12	92.6874	64.2396	10.4102	11.8806	32.1118	21.0403	70.0218	15.8855	7.01167
neg_4210	Cis-Zeatin-7-N-glucoside	47.9	60.1	-5.38528	C16H23N5O6	402.137	2.7521	--	--	--	--	--	--	HMDB0012201	823188-69-8	Organic compounds	Organic oxygen compounds	Organooxygen compounds	Carbohydrates and carbohydrate conjugates	252.509	157.241	293.5	312.082	110.576	293.5	288.743	270.563	504.855	507.285	569.104	251.049	242.563	290.151	199.085	402.474	708.684	415.278	398.268	404.778
neg_423	Gentamicin X2	47.4	53.1	-1.3985	C19H38N4O10	503.233	0.547933	C17702	Neomycin, kanamycin and gentamicin biosynthesis(ko00524);;Biosynthesis of secondary metabolites(ko01110)	--	--	--	--	--	--	--	--	--	--	2.63283	36.9752	1.23e-12	97.9162	7.19992	20.5333	28.0752	19.436	2.83478	9.70301	10.2716	30.0367	21.4063	4.92077	26.639	20.7014	9.71728	2.39784	29.5827	6.69939
neg_4231	Docosanoyl-CoA	41.8	33.6	-7.99463	C43H78N7O17P3S	1110.4	2.77355	C16528	Biosynthesis of unsaturated fatty acids(ko01040);;Fatty acid metabolism(ko01212)	LMFA07050289	Fatty Acyls [FA]	Fatty esters [FA07]	Fatty acyl CoAs [FA0705]	HMDB0012930	--	Organic compounds	Lipids and lipid-like molecules	Fatty Acyls	Fatty acyl thioesters	1035.53	358.388	504.429	433.189	499.619	290.768	486.098	429.226	840.512	760.791	21.8755	299.057	555.866	113.696	18.5382	208.18	85.7259	442.119	154.405	44.0488
neg_4235	3-HYDROXYCOUMARIN	53.9	84.3	11.0896	C9H6O3	161.026	2.7664	--	--	--	--	--	--	HMDB0002149	939-19-5	Organic compounds	Phenylpropanoids and polyketides	Coumarins and derivatives	Hydroxycoumarins	620.304	1038.6	594.384	357.547	1563.1	278.395	830.661	387.649	8474.6	4061.21	295.945	914.01	939.102	659.652	545.192	533.092	1371.93	1277.31	369.66	1069.75
neg_4246	Methyldopa	41.5	17.4	-5.87762	C10H13NO4	256.081	2.77355	C07194	--	--	--	--	--	HMDB0011754	555-30-6	Organic compounds	Phenylpropanoids and polyketides	Phenylpropanoic acids	--	50.4948	87.068	31.9438	10.1328	145.507	17.9392	72.4305	22.3992	1253.37	397.775	14.0318	90.5646	66.7285	42.795	44.0971	42.6709	106.103	116.761	17.2613	77.4011
neg_4248	Isosakuranetin	49.9	60.7	4.50359	C16H14O5	321.055	2.7664	C05334	Flavonoid biosynthesis(ko00941);;Biosynthesis of secondary metabolites(ko01110)	LMPK12140355	Polyketides [PK]	Flavonoids [PK12]	Flavanones [PK1214]	HMDB0253690	--	Organic compounds	Phenylpropanoids and polyketides	Flavonoids	O-methylated flavonoids	28.1292	43.69	22.8397	11.8143	91.1069	7.97328	20.4107	5.83639	241.17	136.153	4.66037	40.9281	46.5658	25.7159	19.7514	10.5495	58.6491	39.8354	8.64258	34.9616
neg_4250	Carlactone	47.9	63.8	-19.3541	C19H26O3	337.152	2.7664	C20693	Carotenoid biosynthesis(ko00906);;Biosynthesis of secondary metabolites(ko01110)	--	--	--	--	--	--	--	--	--	--	2150.93	1509.85	1569.45	1950.45	2618.96	659.462	2048.36	804.776	2186.19	2447.36	2863.33	6997.1	3402.33	2821.08	3807.28	3098.65	4785.23	6958.78	2937.91	2058.64
neg_4251	Dapdiamide C	45.2	65.6	-33.9522	C13H22N4O5	349.118	2.7664	C20964	Metabolic pathways(ko01100);;Biosynthesis of secondary metabolites(ko01110)	--	--	--	--	--	--	--	--	--	--	258.08	70.1118	122.403	104.681	76.5639	221.13	337.123	229.941	199.987	139.757	193.872	119.975	176.245	172.752	196.147	362.82	217.427	168.825	272.516	208.387
neg_4259	(4-{4-[2-(gamma-L-Glutamylamino)ethyl]phenoxymethyl}furan-2-yl)methanamine	49.3	69.5	-2.12181	C19H25N3O5	410.148	2.77355	C21070	Metabolic pathways(ko01100);;Biosynthesis of cofactors(ko01240)	--	--	--	--	--	--	--	--	--	--	0.761319	71.4689	12.7053	17.4782	4.36111	260.028	127.326	208.255	1.85085	56.1952	1.23e-12	9.45858	1.23e-12	231.925	17.4092	47.0531	8.00461	32.0792	204.711	28.413
neg_426	4-(Cytidine 5'-diphospho)-2-C-methyl-D-erythritol	40.8	35.2	12.6486	C14H25N3O14P2	520.08	0.547933	C11435	Terpenoid backbone biosynthesis(ko00900);;Metabolic pathways(ko01100);;Biosynthesis of secondary metabolites(ko01110)	--	--	--	--	HMDB0304166	--	Organic compounds	Nucleosides, nucleotides, and analogues	Pyrimidine nucleotides	Pyrimidine ribonucleotides	30.9524	45.0256	49.2193	46.7137	60.2712	27.0969	29.1429	22.6611	14.3646	40.2009	21.7207	36.0301	58.3542	25.8399	66.8813	45.1771	20.7908	21.9157	31.2065	30.391
neg_4261	6-Amino-6-deoxyfutalosine	46	53.9	-15.3757	C19H19N5O6	458.125	2.7664	C20773	Ubiquinone and other terpenoid-quinone biosynthesis(ko00130);;Metabolic pathways(ko01100);;Biosynthesis of secondary metabolites(ko01110);;Biosynthesis of cofactors(ko01240)	--	--	--	--	--	--	--	--	--	--	181.191	83.3088	86.0215	98.689	93.4141	172.619	30.2614	15.8065	422.979	1859.34	185.029	134.186	108.119	731.014	17.7664	19.9374	3877.97	1882.49	211.869	288.224
neg_4263	Idescarpin	46.8	58.1	5.72753	C20H24O11	485.133	2.7664	--	--	--	--	--	--	--	--	--	--	--	--	72.5488	34.9479	43.063	25.4403	59.7434	25.6583	18.8978	1.23e-12	74.1819	101.279	146.669	167.996	36.9925	58.3239	6.442	53.9579	145.377	169.162	85.627	127.113
neg_4266	Ampelopsin A	41.4	31.7	3.60861	C28H22O7	515.136	2.7664	--	--	--	--	--	--	--	--	--	--	--	--	82.8066	116.01	52.2808	54.7351	172.624	148.669	75.2767	84.3018	1154.43	599.252	30.1263	59.1868	83.928	63.9991	3.45316	85.2862	363.229	161.511	130.692	270.45
neg_4267	Neoandrographolide	47	53.6	8.36083	C26H40O8	515.246	2.77355	--	--	--	--	--	--	HMDB0255516	--	Organic compounds	Lipids and lipid-like molecules	Prenol lipids	Terpene glycosides	725.196	809.636	736.896	1259.76	942.102	1631.47	1785.2	1499.72	343.393	1491.64	485.328	1211.76	615.668	1019.24	1475.17	2041.18	377.523	1608.32	1649.04	1685.43
neg_4268	Lipoyl-AMP	42.8	45.5	-4.33695	C18H26N5O8PS2	556.068	2.7664	C16238	Lipoic acid metabolism(ko00785);;Metabolic pathways(ko01100)	--	--	--	--	HMDB0059635	--	Organic compounds	Nucleosides, nucleotides, and analogues	Purine nucleotides	Purine ribonucleotides	7.8475	29.3419	1.23e-12	1.23e-12	343.084	0.123957	7.22207	1.23e-12	2531.14	790.617	13.5994	42.0845	182.525	13.5418	1.70946	0.930387	142.112	54.3308	0.0102339	5.68083
neg_4280	Deacetylbowdensine	40.1	38.8	45.5227	C17H21NO5	318.149	2.78072	--	--	--	--	--	--	--	--	--	--	--	--	69.5408	170.977	192.638	378.013	103.667	557.991	839.945	723.35	97.6344	261.827	16.7895	154.383	157.239	111.033	422.136	937.201	151.329	537.963	731.11	440.652
neg_4281	12-Keto-leukotriene B4	49.8	72	-7.55335	C20H30O4	369.181	2.78072	C05949	Arachidonic acid metabolism(ko00590)	--	--	--	--	HMDB0004234	136696-10-1	Organic compounds	Lipids and lipid-like molecules	Fatty Acyls	Eicosanoids	19.214	17.2012	15.6692	128.148	2.49345	115.034	464.923	269.349	110.499	8.69604	1.23e-12	2.63405	0.421786	18.2385	834.495	405.393	165.997	158.857	607.86	181.617
neg_4283	Majoroside	44.3	64.8	-26.0658	C17H24O10	409.101	2.78072	--	--	--	--	--	--	--	--	--	--	--	--	1.23e-12	0.00109948	1.23e-12	0.731605	1.23e-12	89.3235	46.3059	81.6081	1.23e-12	0.2128	1.23e-12	1.34777	0.171774	1.23e-12	1.23e-12	23.7291	1.23e-12	61.8864	35.3842	32.6962
neg_4284	Naringenin-7-O-Neohesperidoside(Naringin)	41.3	34.7	1.35116	C27H32O14	625.178	2.78072	--	--	--	--	--	--	--	--	--	--	--	--	469.57	508.502	514.649	532.103	618.421	104.596	417.539	154.366	1342.07	812.582	408.264	717.575	502.932	513.96	213.406	497.291	581.475	833.01	377.445	569.502
neg_4303	Shanzhiside	40.9	40.8	3.76652	C16H24O11	413.108	2.80215	C17066	--	--	--	--	--	HMDB0258270	--	Organic compounds	Lipids and lipid-like molecules	Prenol lipids	Terpene glycosides	91.1787	65.1912	27.4991	3.55959	43.6576	90.6557	5.6173	16.0888	26.3558	67.6998	101.347	65.0481	14.2753	166.593	1.23e-12	18.4791	242.248	31.9701	97.3893	12.4437
neg_4314	Ankorine	43.7	41.4	-2.67897	C19H29NO4	356.183	2.80932	C09337	Isoquinoline alkaloid biosynthesis(ko00950)	--	--	--	--	--	--	--	--	--	--	26.6613	26.6072	49.5035	75.4887	11.651	45.7888	54.0542	54.2559	35.19	44.4184	5.98547	9.32143	2.88263	16.9159	52.6276	53.074	19.1642	25.199	28.083	28.8603
neg_432	CMP-3-deoxy-D-manno-octulosonate	45	48.8	-2.37774	C17H26N3O15P	564.084	0.547933	C04121	Metabolic pathways(ko01100);;Biosynthesis of nucleotide sugars(ko01250)	--	--	--	--	HMDB0304292	--	Organic compounds	Nucleosides, nucleotides, and analogues	Pyrimidine nucleotides	Pyrimidine nucleotide sugars	16.568	28.7393	29.7096	6.91902	31.6908	14.4359	12.5027	13.9561	8.34377	13.241	7.55033	14.0596	4.56716	14.4985	23.0718	8.72221	1.23e-12	12.3347	13.5786	5.81605
neg_4323	Pseudolaric acid A-O-beta-D-glucopyranoside	46.1	69.7	19.474	C28H38O11	585.222	2.80932	--	--	--	--	--	--	--	--	--	--	--	--	1183.05	535.07	734.545	560.625	446.702	744.882	1064.26	735.699	352.472	387.68	395.211	764.652	465.077	623.222	921.356	869.455	389.8	658.179	610	395.757
neg_4327	(S)-3-Methyl-2-oxopentanoic acid	42.2	26.1	12.9129	C6H10O3	129.057	2.82362	C00671	Valine, leucine and isoleucine degradation(ko00280);;Valine, leucine and isoleucine biosynthesis(ko00290);;Glucosinolate biosynthesis(ko00966);;Metabolic pathways(ko01100);;Biosynthesis of secondary metabolites(ko01110);;2-Oxocarboxylic acid metabolism(ko01210);;Biosynthesis of amino acids(ko01230)	--	--	--	--	HMDB0000491	24809-08-3	Organic compounds	Organic acids and derivatives	Keto acids and derivatives	Short-chain keto acids and derivatives	177.425	433.599	719.363	280.819	676.854	1272.02	348.249	731.87	155.257	294.064	56.6035	311.816	328.903	1414.73	254.705	292.52	186.51	251.552	967.798	186.059
neg_4328	Terreic acid	40.8	21.6	8.58216	C7H6O4	153.021	2.81647	--	--	--	--	--	--	HMDB0258836	--	Organic compounds	Organic oxygen compounds	Organooxygen compounds	Carbonyl compounds	88.1987	67.792	79.7774	80.6977	80.3546	30.3519	27.8457	38.5191	106.791	74.1277	88.3803	69.9356	93.4433	59.6775	83.7656	41.9442	108.203	108.643	50.38	125.078
neg_4330	Tetrahydropalmatine	45.4	33.3	-0.148852	C21H25NO4	376.153	2.82362	C02890	Isoquinoline alkaloid biosynthesis(ko00950);;Biosynthesis of secondary metabolites(ko01110)	--	--	--	--	--	--	--	--	--	--	260.047	375.657	383.651	762.567	235.135	1417.3	1487.12	1081.87	324.759	969.822	158.148	197.962	261.335	259.046	774.408	1555.07	350.23	1208.54	1543.76	582.139
neg_4331	7-Deoxyloganic acid	40.7	36.4	-28.0611	C16H24O9	395.101	2.81647	--	--	--	--	--	--	HMDB0037028	92842-56-3	Organic compounds	Lipids and lipid-like molecules	Prenol lipids	Terpene glycosides	9.95466	13.4957	8.16238	30.0143	5.17565	294.392	79.8918	238.479	23.2615	77.1036	9.28665	56.8258	7.53877	2.28582	26.1629	286.744	279.183	256.838	323.726	302.18
neg_4335	6'-O-Feruloyl-D-sucrose	43.5	27.8	-0.816906	C22H30O14	517.156	2.82362	--	--	--	--	--	--	--	--	--	--	--	--	2711.3	2036.94	2015.11	2062.19	2414.01	1793.94	1934.96	2148.97	3153.92	1789.4	2034.17	1936.83	2886.6	1401.44	1624.14	1561.13	1945.94	2083.24	1711.84	1481.65
neg_4345	Gibberellin A8-catabolite	45.9	71.4	-35.6107	C19H22O7	361.116	2.83792	C11870	Diterpenoid biosynthesis(ko00904)	LMPR0104170027	Prenol Lipids [PR]	Isoprenoids [PR01]	C20 isoprenoids (diterpenes) [PR0104]	HMDB0304364	--	Organic compounds	Lipids and lipid-like molecules	Prenol lipids	Diterpenoids	37.4378	3.46459	0.207444	10.8857	1.23e-12	80.1188	55.2529	33.0702	98.1954	145.245	7.91013	30.115	7.05046	2.60202	2.13049	62.5922	203.44	278.759	157.359	87.4084
neg_4346	16-Methoxy-2,3-dihydro-3-hydroxytabersonine	45.4	35.4	-4.48105	C22H28N2O4	383.196	2.83792	C04578	Indole alkaloid biosynthesis(ko00901);;Metabolic pathways(ko01100);;Biosynthesis of secondary metabolites(ko01110)	--	--	--	--	--	--	--	--	--	--	1.23e-12	44.3414	31.9334	72.5749	18.2622	130.97	153.237	156.346	10.7667	56.3128	1.23e-12	11.8053	2.78693	3.38299	133.506	140.488	19.7612	36.2675	90.8301	28.1168
neg_4347	Chrysoeriol-6-C-glucoside	42.1	26.7	-9.239	C22H22O11	497.081	2.83792	--	--	--	--	--	--	--	--	--	--	--	--	17.1574	13.6671	78.8771	8.70338	35.2175	291.958	1.23e-12	91.6086	366.382	695.193	50.0611	0.189428	1.99203	18.6029	15.6035	1.23e-12	382.514	74.6318	38.7189	66.5039
neg_4358	5-Hydroxyferulate	43.7	31	7.94506	C10H10O5	209.047	2.84507	C05619	Phenylpropanoid biosynthesis(ko00940);;Metabolic pathways(ko01100);;Biosynthesis of secondary metabolites(ko01110)	--	--	--	--	HMDB0035484	110642-42-7	Organic compounds	Phenylpropanoids and polyketides	Cinnamic acids and derivatives	Hydroxycinnamic acids and derivatives	64.4817	5.84515	0.13692	9.42182	3.85865	50.9648	41.7289	26.8898	352.854	60.8367	8.48178	13.5228	1.50786	7.08395	4.03143	17.2674	27.6901	35.6192	10.9919	40.1552
neg_4368	Syringalide A	47.7	57.3	-7.85466	C23H26O10	483.124	2.85222	--	--	--	--	--	--	--	--	--	--	--	--	64.9202	65.5101	45.576	90.5928	58.3106	38.3676	24.2567	28.4621	1.23e-12	149.332	205.158	147.523	105.083	101.855	147.222	35.7336	124.269	122.487	41.788	121.267
neg_438	Isoswertisin 2''-rhamnoside	42.2	36	-10.6741	C28H32O14	627.142	0.547933	C12629	Flavone and flavonol biosynthesis(ko00944)	--	--	--	--	HMDB0037417	64821-00-7	Organic compounds	Phenylpropanoids and polyketides	Flavonoids	Flavonoid glycosides	22.6433	96.582	74.2422	114.229	80.8886	43.9684	88.0784	42.0975	5.71342	24.4169	35.173	97.1242	67.5408	25.4179	62.7209	64.5572	63.9311	36.1839	67.8822	29.9315
neg_4381	1-O-Feruloyl-D-Glucose	42.2	19	5.15464	C16H20O9	355.105	2.85937	--	--	--	--	--	--	--	--	--	--	--	--	188.086	744.848	644.921	372.187	645.592	635.399	638.396	736.35	551.75	138.794	49.8963	355.581	549.555	282.92	496.74	277.313	556.066	174.755	653.301	178.158
neg_4382	Erythronolide B	46	74.5	-45.9391	C21H38O7	437.213	2.85937	C06635	Metabolic pathways(ko01100);;Biosynthesis of secondary metabolites(ko01110)	--	--	--	--	--	--	--	--	--	--	34.3594	31.178	11.7618	66.5544	1.60946	57.1411	144.964	114.46	2.64732	23.3105	45.8744	38.3083	32.1556	34.4433	111.088	334.063	39.4627	212.672	192.491	103.79
neg_4383	Paspaline	42.5	56.3	-12.2856	C28H39NO2	442.268	2.85937	C20530	Metabolic pathways(ko01100);;Biosynthesis of secondary metabolites(ko01110)	--	--	--	--	--	--	--	--	--	--	10.2581	98.6536	130.44	239.34	59.8953	385.684	606.647	693.904	85.9035	81.8974	18.9815	30.3792	14.9973	58.7982	1251.8	609.213	64.0225	332.724	447.932	357.348
neg_4385	8-Ethyl-12-methyl-3-vinylbacteriochlorophyllide d	44.1	49.6	-5.43096	C33H32MgN4O3	591.199	2.85937	C18157	Porphyrin metabolism(ko00860);;Biosynthesis of secondary metabolites(ko01110)	--	--	--	--	--	--	--	--	--	--	430.778	292.6	215.574	223.731	208.078	375.584	437.134	275.108	287.698	390.949	62.5985	212.816	174.291	139.573	40.6235	184.872	207.308	575.962	214.729	304.556
neg_4387	(4R)-7-Hydroxy-4-isopropenyl-7-methyl-2-oxo-oxepanone	45.5	57.2	-28.6928	C10H16O3	229.103	2.86652	C19079	Limonene and pinene degradation(ko00903);;Biosynthesis of secondary metabolites(ko01110)	--	--	--	--	--	--	--	--	--	--	19.2739	89.3319	78.8497	120.618	66.0327	28.6207	15.7495	19.3605	1.23e-12	29.1257	43.7947	147.493	45.3869	74.2247	90.9768	12.6054	6.13785	13.0375	15.7813	7.94075
neg_4388	2-Oxo-7-methylthioheptanoic acid	45.2	50.5	-10.2208	C8H14O3S	235.063	2.86652	C17220	Glucosinolate biosynthesis(ko00966);;Biosynthesis of secondary metabolites(ko01110);;2-Oxocarboxylic acid metabolism(ko01210)	--	--	--	--	--	--	--	--	--	--	5.77086	29.4499	22.1785	15.3304	25.8601	21.2743	27.0957	29.8071	7.22675	4.09257	2.05947	19.9224	29.6037	12.479	35.9824	8.80216	5.49956	3.91429	22.1967	8.89652
neg_4389	Senkyunolide H	51	66	3.8045	C12H16O4	245.08	2.87367	--	--	--	--	--	--	HMDB0258236	--	Organic compounds	Organoheterocyclic compounds	Isobenzofurans	--	73.1372	99.2653	151.772	109.195	167.754	51.8352	106.787	87.6244	71.4027	112.466	281.714	395.391	240.864	119.459	112.705	195.791	255.006	303.205	185.489	215.525
neg_4391	4(3H)-Quinazolinone	40.8	8.96	1.74432	C8H6N2O	337.095	2.86652	--	--	--	--	--	--	HMDB0246465	--	Organic compounds	Organoheterocyclic compounds	Diazanaphthalenes	Benzodiazines	71.8378	39.2491	192.769	7.06712	89.7632	66.1804	1.23e-12	0.00804807	146.262	21.6152	451.662	148.02	60.2454	461.111	11.2503	0.101477	9.99751	0.0924432	1.23e-12	0.267517
neg_4392	Nicotine-N-glucuronide	42.1	42.8	13.9445	C16H23N2O6-	384.159	2.87367	--	--	--	--	--	--	--	--	--	--	--	--	1.23e-12	18.0712	17.2073	39.6532	6.89977	51.0201	53.5396	59.3384	9.70952	8.34919	2.00492	14.7741	1.23e-12	11.6527	120.188	62.1291	22.4675	31.0684	47.1036	27.8365
neg_4393	Cannabigerolate	48.4	73.5	-10.4373	C22H32O4	395.196	2.86652	C20406	Biosynthesis of various plant secondary metabolites(ko00999);;Metabolic pathways(ko01100);;Biosynthesis of secondary metabolites(ko01110)	--	--	--	--	HMDB0304284	--	Organic compounds	Benzenoids	Benzene and substituted derivatives	Benzoic acids and derivatives	3.04211	1.23e-12	23.1549	35.0919	3.12661	2.67487	81.4622	49.3231	0.702921	3.50579	1.23e-12	18.2075	3.04666	12.9489	201.519	35.5327	0.140768	21.3693	44.7345	11.5496
neg_4394	Lactobionic acid	47.5	42.2	-0.331308	C12H22O12	403.109	2.86652	--	--	--	--	--	--	HMDB0253945	--	Organic compounds	Lipids and lipid-like molecules	Fatty Acyls	Fatty acyl glycosides	22.5925	83.3347	102.634	179.625	81.618	157.373	223.299	195.678	23.5932	149.158	16.8563	108.283	4.77418	60.0422	0.541247	186.652	22.526	355.941	254.333	278.379
neg_4415	Prohydrojasmon (racemate)	47.3	58.5	16.0722	C15H26O3	289.162	2.88082	--	--	--	--	--	--	--	--	--	--	--	--	148.876	118.252	67.3201	133.869	132.976	56.9848	130.454	43.6792	461.219	260.781	61.5518	64.7136	87.4803	81.5371	13.8888	117.929	65.1954	87.1254	45.6466	165.49
neg_4417	Seneciphylline	48.5	79.3	38.7225	C18H23NO5	332.163	2.88082	C10391	--	--	--	--	--	HMDB0258231	--	Organic compounds	Alkaloids and derivatives	--	--	560.839	1499.21	657.3	1788.9	2688.91	1234.62	4413.21	1960.74	8179.05	4850.36	817.044	1139	1162.97	939.913	2296.21	2629.29	1739.85	2367.42	2457.36	2919.75
neg_4420	Geissoschizine methyl ether	45.7	67.1	-9.6472	C22H26N2O3	387.165	2.88082	--	--	--	--	--	--	HMDB0252664	--	Organic compounds	Alkaloids and derivatives	Corynanthean-type alkaloids	--	2.38031	17.0591	38.3431	23.628	6.62676	54.4957	64.6167	65.8138	11.2449	14.0021	4.33692	31.567	6.28095	4.31735	31.7694	93.5061	8.45913	61.8505	78.1992	24.2787
neg_4429	D-Urobilin	47.7	76.4	10.1675	C33H40N4O6	609.275	2.88082	C05795	Porphyrin metabolism(ko00860);;Metabolic pathways(ko01100);;Biosynthesis of secondary metabolites(ko01110)	--	--	--	--	--	--	--	--	--	--	41.6743	35.0467	58.4597	60.7576	13.211	260.573	437.26	361.953	49.9003	137.956	26.4794	17.2018	28.6816	23.1331	223.632	344.218	17.0168	183.094	295.52	270.706
neg_4431	bryotoxin A	48.9	72.1	-16.7867	C32H42O12	653.227	2.88082	C08853	--	--	--	--	--	--	--	--	--	--	--	1622.64	1109.91	1424.95	1610.54	2247.25	1157.61	1304.77	1057.25	11918.4	1384.57	2417.36	1238.71	2130.58	1330.62	3772.06	1345.03	2912.4	1477.7	1155.06	952.107
neg_4435	Val Trp	40.9	12.9	5.5396	C16H21N3O3	302.153	2.88797	--	--	--	--	--	--	--	--	--	--	--	--	172.653	586.875	670.511	1078.33	304.907	908.147	1303.65	1081.91	214.847	443.409	115.42	267.013	265.13	292.813	732.918	1832.65	362.683	1353.23	1455.53	905.651
neg_4436	alpha-Ribazole	45	33.9	5.97836	C14H18N2O4	323.127	2.88797	C05775	Porphyrin metabolism(ko00860);;Metabolic pathways(ko01100);;Biosynthesis of cofactors(ko01240)	--	--	--	--	HMDB0011112	--	Organic compounds	Nucleosides, nucleotides, and analogues	Benzimidazole ribonucleosides and ribonucleotides	--	219.239	148.73	238.389	138.894	298.727	224.808	111.709	160.075	253.951	167.914	199.832	129.038	151.263	690.444	169.978	187.888	291.089	203.396	169.943	240.969
neg_4441	Tetrahydrobiopterin	45.2	57.3	1.26756	C9H15N5O3	527.234	2.88797	C00272	Folate biosynthesis(ko00790);;Metabolic pathways(ko01100);;Biosynthesis of cofactors(ko01240)	--	--	--	--	HMDB0000027	62989-33-7	Organic compounds	Organoheterocyclic compounds	Pteridines and derivatives	Pterins and derivatives	936.981	387.172	515.97	552.388	396.617	622.793	719.17	768.251	532.932	519.006	457.928	592.715	471.685	302.785	659.278	637.511	544.418	568.391	591.024	390.951
neg_4448	N4-Acetylcytidine	48.8	75.9	26.4298	C11H15N3O6	306.078	2.90225	C22293	--	--	--	--	--	HMDB0005923	3768-18-1	Organic compounds	Nucleosides, nucleotides, and analogues	Pyrimidine nucleosides	--	53.903	39.6179	30.6201	53.2538	28.7048	49.583	23.2587	4.4468	223.115	206.835	469.877	96.7308	145.898	180.127	56.9661	35.3215	744.27	73.4192	37.3355	28.8376
neg_4450	1-O-Cinnamoyl-β-D-glucose	41.8	34.2	-7.70316	C15H18O7	331.078	2.89512	--	--	--	--	--	--	--	--	--	--	--	--	4.31652	1.85133	4.52599	1.23e-12	0.0576422	140.814	1.23e-12	0.0505238	1.09293	4.10275	3.6922	10.901	8.15782	31.8559	1.75074	0.281669	27.6565	21.2312	163.015	6.42808
neg_4453	6.alpha.-Methylprednisolone	48.2	54.7	7.40134	C22H30O5	409.181	2.90225	--	--	--	--	--	--	--	--	--	--	--	--	308.16	312.246	242.287	393.239	144.445	329.67	668.008	513.48	425.323	402.365	218.947	213.491	416.534	475.517	497.465	753.01	535.281	659.163	501.235	660.353
neg_4455	Rosavin	45.2	60.5	-15.2553	C20H28O10	463.131	2.89512	--	--	--	--	--	--	HMDB0257308	--	Organic compounds	Lipids and lipid-like molecules	Fatty Acyls	Fatty acyl glycosides	2.86015	14.1849	9.17479	45.8392	1.23e-12	3.59041	12.3717	15.2065	30.7212	22.9947	6.60493	21.583	10.8818	11.5725	225.83	13.5017	28.7116	73.2381	58.1075	220.354
neg_4465	6'-O-Glucosylaucubin	48.4	57	-3.64991	C21H32O14	1061.35	2.90942	--	--	--	--	--	--	--	--	--	--	--	--	963.699	379.756	701.902	410.966	266.309	297.003	323.953	333.43	455.142	305.137	130.049	363.333	260.363	176.481	63.6846	200.287	37.0327	249.611	269.538	44.3246
neg_4467	5-O-Caffeoylshikimic acid	42.3	37.3	7.37883	C16H16O8	335.08	2.90942	C10434	Phenylpropanoid biosynthesis(ko00940);;Flavonoid biosynthesis(ko00941);;Stilbenoid, diarylheptanoid and gingerol biosynthesis(ko00945);;Metabolic pathways(ko01100);;Biosynthesis of secondary metabolites(ko01110)	--	--	--	--	HMDB0033999	73263-62-4	Organic compounds	Phenylpropanoids and polyketides	Cinnamic acids and derivatives	Hydroxycinnamic acids and derivatives	1.23e-12	24.0783	18.7873	25.3687	73.2166	1.23e-12	0.00222437	11.3696	334.384	141.732	32.434	102.595	82.9976	100.793	76.0469	25.5534	97.0016	48.5112	30.3574	81.2394
neg_4470	Usaramine N-oxide	48.6	60.6	-14.4601	C18H25NO7	366.151	2.90942	--	--	--	--	--	--	--	--	--	--	--	--	23.2521	91.7059	88.6432	195.307	49.7952	215.476	305.975	289.275	63.5442	75.7404	14.4106	61.7936	60.7144	84.5025	235.729	262.598	92.9029	159.466	246.325	118.986
neg_4471	O-Acetyl-L-carnitine	41.2	19.1	1.95724	C9H17NO4	405.225	2.90942	C02571	--	--	--	--	--	HMDB0000201	3040-38-8	Organic compounds	Lipids and lipid-like molecules	Fatty Acyls	Fatty acid esters	152.716	1102.92	517.521	2078.51	445.724	1079.69	1805.92	2012.83	248.294	250.375	99.1602	360.924	568.716	469.928	4886.23	1511.14	281.036	628.604	1344.55	332.034
neg_4481	Terrestrosin D	46.8	58.5	18.3338	C50H80O23	1047.52	2.91657	--	--	--	--	--	--	--	--	--	--	--	--	1.23e-12	1.19147	1.23e-12	1.23e-12	1.23e-12	360.725	1080.4	565.574	1.23e-12	1.23e-12	1.23e-12	1.23e-12	1.23e-12	1.23e-12	13.5934	1612.02	1.23e-12	1467.66	792.632	417.223
neg_4487	Meliarachin B	41.8	44.1	-2.47122	C30H36O11	607.194	2.91657	--	--	--	--	--	--	--	--	--	--	--	--	456.13	339.482	568.179	349.084	461.571	362.426	381.091	387.287	546.416	280.958	594.747	530.553	696.676	288.666	435.1	363.566	396.915	363.283	428.036	282.322
neg_4494	(5-L-Glutamyl)-L-amino acid	40.8	36.1	-33.1879	C8H14N2O5	239.058	2.93087	C03740	Glutathione metabolism(ko00480);;Metabolic pathways(ko01100)	--	--	--	--	--	--	--	--	--	--	5.99013	11.4341	4.78872	16.2542	7.11871	87.8635	5.70472	22.144	15.876	15.6026	26.4999	26.9677	5.59615	248.795	12.0663	7.55518	3.08397	14.1515	159.44	6.64089
neg_4496	5-Hydroxy-N-formylkynurenine	40.1	24.2	-22.3499	C11H12N2O5	273.044	2.93087	C05648	Tryptophan metabolism(ko00380);;Metabolic pathways(ko01100)	--	--	--	--	HMDB0004086	--	Organic compounds	Organic oxygen compounds	Organooxygen compounds	Carbonyl compounds	7.45524	6.88731	3.13701	6.96918	10.0147	338.378	4.25909	1.04696	12.2146	5.25862	7.96102	9.6962	13.9718	20.2377	7.48202	2.68616	7.66886	14.6483	235.547	30.1926
neg_4498	11243195	41.3	28	-15.553	C17H20O4	323.101	2.93087	--	--	--	--	--	--	--	--	--	--	--	--	259.385	201.233	673.698	134.193	199.73	184.401	89.8867	177.077	174.282	134.222	160.088	285.633	92.9201	5897.8	79.5151	108.431	170.641	115.264	177.059	202.05
neg_450	Specneuzhenide	47.6	67.7	8.46024	C31H42O17	721.217	0.547933	--	--	--	--	--	--	--	--	--	--	--	--	1.23e-12	105.605	29.1199	132.332	17.7293	33.8118	39.5224	58.633	1.23e-12	0.280229	14.186	59.1548	35.0058	33.09	79.7985	19.751	10.6155	4.13679	77.8339	1.23e-12
neg_4500	15-Demethoxy-epsilon-rhodomycin	45.9	52.8	-1.64488	C29H33NO11	592.179	2.93087	C18641	Biosynthesis of secondary metabolites(ko01110)	--	--	--	--	--	--	--	--	--	--	68.0047	74.7946	31.7312	78.1824	60.2635	303.498	64.9719	136.837	16.3571	64.8937	8.3386	41.4852	13.5982	45.2781	36.561	46.2156	42.5294	106.258	382.777	64.2117
neg_4502	magnoloside B	40.1	30.2	-12.6038	C35H46O20	785.241	2.93087	C17679	--	--	--	--	--	--	--	--	--	--	--	1196.8	442.15	638.065	468.171	840.801	534.928	500.756	284.867	1003.93	1265.04	543.357	616.866	531.777	624.756	126.266	276.334	437.832	1415.27	679.89	598.89
neg_4509	Swainsonine	43.8	32.4	10.6974	C8H15NO3	172.1	2.938	C10173	Tropane, piperidine and pyridine alkaloid biosynthesis(ko00960)	--	--	--	--	--	--	--	--	--	--	361.707	936.777	348.191	507.118	278.681	596.335	626.434	403.434	382.243	577.681	344.318	578.741	133.079	467.767	166.795	1078.45	539.378	725.838	1078.86	984.102
neg_4518	hellebrigenin-3-acetate	44.3	84.8	31.5683	C26H34O7	479.22	2.938	--	--	--	--	--	--	--	--	--	--	--	--	122.636	217.04	157.078	299.969	101.624	517.934	645.485	677.318	177.237	245.352	121.2	161.585	150.681	129.891	632.26	583.322	188.773	441.485	444.566	605.286
neg_4521	Dodecanoic acid ingenol ester	47.7	61.8	1.65598	C32H50O7	581.326	2.938	--	--	--	--	--	--	--	--	--	--	--	--	1.23e-12	1.23e-12	1.23e-12	0.353731	1.23e-12	119.67	450.632	238.72	0.0389773	1.23e-12	0.0517548	0.539694	1.23e-12	0.0302263	398.817	284.264	0.339084	455.832	320.484	633.098
neg_4525	Dehydrotomatine	40.1	56.3	48.6272	C50H81NO21	1076.58	2.95232	--	--	--	--	--	--	HMDB0032002	157604-98-3	Organic compounds	Lipids and lipid-like molecules	Steroids and steroid derivatives	Steroidal glycosides	61.5919	103.708	249.548	270.261	1.23e-12	1.23e-12	0.00352961	3.91364	1.23e-12	24.4276	1.23e-12	475.615	121.313	13.689	247.162	57.0319	1.23e-12	1.23e-12	1.23e-12	1.23e-12
neg_4527	2-Oxoindole-3-acetate	42.4	30	11.0467	C10H9NO3	190.053	2.94517	C22202	Tryptophan metabolism(ko00380)	--	--	--	--	--	--	--	--	--	--	0.416558	192.711	139.704	272.244	96.9357	78.6278	116.305	230.01	6.18065	32.6608	22.6922	309.891	28.6983	115.929	98.5181	122.426	50.8995	53.5753	72.4852	117.259
neg_4528	L-Kynurenine	40.4	32.9	-4.24879	C10H12N2O3	415.161	2.94517	C00328	Tryptophan metabolism(ko00380);;Metabolic pathways(ko01100);;Biosynthesis of cofactors(ko01240)	--	--	--	--	HMDB0000684	2922-83-0	Organic compounds	Organic oxygen compounds	Organooxygen compounds	Carbonyl compounds	1956.52	1020.92	845.012	1058.9	1020.33	794.005	1240.1	783.969	1453.27	1312.68	1055.81	1012.92	1192.64	935.875	1029.53	947.663	1153.21	1288.51	820.496	1095.03
neg_4534	Reduced riboflavin	46	49.9	3.79252	C17H22N4O6	399.13	2.94517	C01007	Riboflavin metabolism(ko00740);;Metabolic pathways(ko01100)	--	--	--	--	HMDB0001557	101652-10-2	Organic compounds	Organoheterocyclic compounds	Pteridines and derivatives	Alloxazines and isoalloxazines	9525.59	7431.04	7721.43	6491.58	3663.76	2520.62	2692.76	3008.29	2093.88	1920.42	2468.6	3439.66	4558.8	2482.6	6896.78	1949.67	2427.85	1918.67	1526.19	1731.32
neg_4541	Antibiotic G-418	49.8	80	-7.22949	C20H40N4O10	517.246	2.94517	C17703	Neomycin, kanamycin and gentamicin biosynthesis(ko00524);;Biosynthesis of secondary metabolites(ko01110)	--	--	--	--	--	--	--	--	--	--	1.23e-12	0.725476	0.0967132	10.6769	1.23e-12	241.504	500.687	426.741	32.5827	140.067	1.23e-12	1.23e-12	0.298984	3.67431	462.726	299.385	45.8266	193.595	229.439	334.241
neg_4554	Coumarin	42.4	36.4	14.0711	C9H6O2	145.032	2.97375	C05851	Biosynthesis of various plant secondary metabolites(ko00999);;Biosynthesis of secondary metabolites(ko01110)	--	--	--	--	HMDB0001218	91-64-5	Organic compounds	Phenylpropanoids and polyketides	Coumarins and derivatives	--	8.4404	22.8319	14.3046	9.67783	24.1391	7.6742	14.0343	9.37641	71.2115	53.9797	3.97062	14.0879	1.23e-12	14.2412	6.03631	5.60194	6.0909	16.4677	5.99292	4.52859
neg_4558	5-Methylcytosine	46.1	51.3	-15.5349	C5H7N3O	295.112	2.96662	C02376	Pyrimidine metabolism(ko00240);;Metabolic pathways(ko01100)	--	--	--	--	HMDB0002894	554-01-8	Organic compounds	Organoheterocyclic compounds	Diazines	Pyrimidines and pyrimidine derivatives	48.6833	153.928	138.2	147.529	129.651	186.138	258.587	302.2	128.208	101.433	50.3142	112.006	120.399	86.3712	189.677	177.372	93.0572	167.354	188.471	128.562
neg_4561	(+)-Peusedanol	45.3	52.8	22.6416	C14H16O5	309.104	2.97375	--	--	--	--	--	--	--	--	--	--	--	--	106.558	154.348	89.7211	158.374	121.101	94.3247	186.221	122.686	163.073	132.28	540.836	380.136	144.56	119.088	235.201	243.476	325.069	345.259	310.757	333.965
neg_4568	Syringopicroside	50.3	85.5	-20.9531	C24H30O11	515.143	2.96662	--	--	--	--	--	--	--	--	--	--	--	--	132.35	30.6878	62.006	11.4042	45.6377	4.69577	13.219	11.1413	81.2584	118.942	52.6677	98.5761	72.4457	46.918	1.23e-12	22.6062	91.6207	114.147	9.33538	124.081
neg_4576	(R)-(Indol-3-yl)lactate	49	56	9.67527	C11H11NO3	250.074	2.98092	C22006	Tryptophan metabolism(ko00380);;Metabolic pathways(ko01100)	--	--	--	--	--	--	--	--	--	--	747.829	277.058	327.244	563.151	399.571	636.885	353.44	427.924	708.583	631.275	3581.08	2534.82	1192.07	2883.12	1725.57	1194.87	5031	2528.42	1621.84	4040.51
neg_4578	3,4-Dihydroxy-9,10-secoandrosta-1,3,5(10)-triene-9,17-dione	48.7	64.2	-17.6452	C19H24O4	351.131	2.98092	C04793	Metabolic pathways(ko01100)	LMST02020062	Sterol Lipids [ST]	Steroids [ST02]	C19 steroids (androgens) and derivatives [ST0202]	--	--	--	--	--	--	604.951	378.866	235.636	535.051	217.236	2329.48	686.68	1464.99	1505.1	846.624	900.377	1097.58	653.829	878.883	262.416	2976.29	2454.23	841.476	1007.18	8406.65
neg_4580	Nafcillin	46.1	43.7	0.253284	C21H22N2O5S	435.1	2.98092	C07250	--	--	--	--	--	HMDB0014745	985-16-0	Organic compounds	Organic acids and derivatives	Carboxylic acids and derivatives	Amino acids, peptides, and analogues	902.861	696.164	781.443	557.405	419.914	1107.08	579.103	1018.24	569.27	1080.87	51.3239	248.382	408.601	180.363	274.998	686.693	1085.25	1807.38	2356.08	1570.75
neg_4584	Acadesine (Drug)	47.8	72.9	-15.9004	C9H14N4O5	575.198	2.98092	--	--	--	--	--	--	--	--	--	--	--	--	1454.39	504.216	915.332	585.067	887.191	470.992	1098.15	383.735	784.918	557.276	302.635	490.613	871.384	653.868	695.769	427.156	421.782	820.632	427.976	705.266
neg_4585	(1R,5aS,6R)-4a-Hydroxy-1,4,4a,5,5a,6,9,10a-octahydrophenazine-1,6-dicarboxylate	47.7	56	-1.06117	C14H16N2O5	583.204	2.98092	C21473	Metabolic pathways(ko01100);;Biosynthesis of secondary metabolites(ko01110)	--	--	--	--	--	--	--	--	--	--	176.434	96.8009	94.4719	156.132	171.332	182.987	92.6678	87.7868	168.535	143.34	102.23	117.992	148.083	82.3604	31.9518	393.142	219.082	722.59	159.632	378.309
neg_4586	100-1	47	69.4	-21.8995	C31H34O10	587.177	2.98092	C12405	Biosynthesis of secondary metabolites(ko01110)	--	--	--	--	--	--	--	--	--	--	1153.2	1068.45	1503.73	1357.37	1833.33	710.625	997.695	847.134	4159.64	977.313	966.587	1429.83	1296.85	1108.98	1604.95	979.62	812.074	937.563	1065.37	983.268
neg_4588	9-Dihydro-13-acetylbaccatin III	49.1	75.1	-16.9811	C33H42O12	675.255	2.98092	--	--	--	--	--	--	--	--	--	--	--	--	1045.63	589.998	884.761	593.395	745.543	477.499	4588.74	496.473	850.831	557.788	406.914	750.337	663.962	564.066	722.821	581.264	360.831	468.242	333.853	478.763
neg_4601	Aminoacetone	50.4	72.3	15.7719	C3H7NO	108.023	2.99522	C01888	Glycine, serine and threonine metabolism(ko00260);;Metabolic pathways(ko01100)	--	--	--	--	HMDB0002134	298-08-8	Organic compounds	Organic oxygen compounds	Organooxygen compounds	Carbonyl compounds	6.52876	43.4713	2.8442	1.55151	1.28433	432.909	81.4085	407.798	1.23e-12	13.5426	17.1715	11.3298	1.23e-12	87.5624	1.23e-12	21.8427	60.8695	16.8008	343.568	38.5068
neg_4604	4-Hydroxybenzaldehyde	56.6	92.9	13.5915	C7H6O2	121.031	3.00237	C00633	Metabolic pathways(ko01100)	--	--	--	--	HMDB0011718	123-08-0	Organic compounds	Organic oxygen compounds	Organooxygen compounds	Carbonyl compounds	3366.94	11210.4	2445.43	1224.55	771.578	66125.4	19573.9	64218.3	487.144	2247.36	7167.79	2962.68	319.351	22958.7	266.769	5125.85	17320.3	2839.15	57888.5	7833.86
neg_4611	L-Adrenaline	45.5	52.4	14.1924	C9H13NO3	228.09	3.00237	C00788	Tyrosine metabolism(ko00350);;Metabolic pathways(ko01100)	--	--	--	--	HMDB0000068	51-43-4	Organic compounds	Benzenoids	Phenols	Benzenediols	1.23e-12	48.0638	23.9894	40.6194	11.6784	29.2521	30.297	23.6499	6.84969	26.7962	13.6607	49.0812	1.12964	30.1672	10.4792	38.4933	23.1744	19.993	31.2734	29.5788
neg_4614	Dihydrophaseic acid	45.4	40.1	7.44573	C15H22O5	281.142	3.00237	C15971	Carotenoid biosynthesis(ko00906)	LMPR0103050005	Prenol Lipids [PR]	Isoprenoids [PR01]	C15 isoprenoids (sesquiterpenes) [PR0103]	HMDB0038660	41756-77-8	Organic compounds	Lipids and lipid-like molecules	Prenol lipids	Sesquiterpenoids	62.0587	25.5277	11.2742	26.4693	42.752	1.23e-12	4.30636	4.52337	101.811	53.0309	79.573	13.3989	69.9485	39.5711	41.6268	26.3878	71.1359	25.0199	1.23e-12	88.6536
neg_4615	Aloesaponarin I	46.6	53.8	-2.25387	C17H12O6	333.037	2.99522	--	--	--	--	--	--	--	--	--	--	--	--	8.03878	11.0856	9.15399	5.29624	12.721	60.2123	10.5347	63.7261	5.38957	5.93023	7.80961	12.1152	11.5308	17.0984	6.81019	6.04857	7.31197	3.46846	51.3757	1.56701
neg_4616	Senecionine N-oxide	44.4	68.4	39.1314	C18H25NO6	350.175	3.00237	C15612	Tropane, piperidine and pyridine alkaloid biosynthesis(ko00960);;Biosynthesis of secondary metabolites(ko01110)	--	--	--	--	HMDB0258230	--	Organic compounds	Alkaloids and derivatives	--	--	8.67403	108.757	102.391	236.1	60.2104	261.475	376.77	409.51	115.046	163.698	0.00347492	33.0824	44.185	45.2273	334.894	344.102	46.404	236.769	326.513	210.496
neg_4617	(3R)-3-Hydroxy-16-methoxy-1,2-didehydro-2,3-dihydrotabersonine	51	67.4	8.95082	C22H26N2O4	403.167	3.00237	C21678	Indole alkaloid biosynthesis(ko00901);;Metabolic pathways(ko01100);;Biosynthesis of secondary metabolites(ko01110)	--	--	--	--	--	--	--	--	--	--	775.325	322.728	269.188	456.003	197.413	506.03	576.38	511.563	435.564	505.342	671.048	430.707	624.462	541.39	653.382	591.888	776.597	527.418	687.719	671.601
neg_4623	Hesperetin-7-O-rutinoside (Hesperidin)	42	46.3	-1.96044	C28H34O15	609.181	2.99522	--	--	--	--	--	--	--	--	--	--	--	--	5542.92	5460.71	5845.46	4590.02	5740.47	2960.56	4331.42	3490.95	5343.37	5230.02	4405.32	5959.62	3610.82	6883.32	3159.38	3229.32	3890.01	3790.94	3286.82	3585.31
neg_4634	(R)-2,3-Dihydroxy-3-methylpentanoate	41.4	18.4	-3.49018	C6H12O4	355.16	3.0095	C06007	Valine, leucine and isoleucine biosynthesis(ko00290);;Metabolic pathways(ko01100);;Biosynthesis of secondary metabolites(ko01110);;2-Oxocarboxylic acid metabolism(ko01210);;Biosynthesis of amino acids(ko01230)	--	--	--	--	HMDB0012140	562-43-6	Organic compounds	Lipids and lipid-like molecules	Fatty Acyls	Fatty acids and conjugates	0.0898259	1.23e-12	8.97583	0.447689	1.23e-12	162.18	0.0133907	46.8978	1.23e-12	60.4209	1.23e-12	0.550111	1.24317	0.123406	0.137851	73.8938	0.255457	4.24457	135.114	123.003
neg_4635	Ptaquiloside	46.6	64.8	-31.4955	C20H30O8	397.174	3.0095	C19515	--	--	--	--	--	HMDB0242690	--	Organic compounds	Organic oxygen compounds	Organooxygen compounds	Carbohydrates and carbohydrate conjugates	673.936	454.369	732.925	904.545	277.434	2339.43	873.149	1716.19	506.949	2334.61	174.369	607.839	835.465	220.636	543.978	1695.18	626.697	888.395	2856.86	2762.4
neg_4637	Apiopaeonoside	49	52.4	-3.57844	C20H28O12	505.155	3.0095	--	--	--	--	--	--	--	--	--	--	--	--	494.126	439.208	713.546	790.115	636.739	319.489	339.733	358.569	501.388	490.61	968.314	1435.81	588.232	547.832	801.904	328.937	508.708	624.559	390.203	588.533
neg_4648	Threoninyl-Glutamate	45.4	40.9	-3.1998	C10H20N2O3S	293.117	3.01667	--	--	--	--	--	--	HMDB0029060	54532-73-9	Organic compounds	Organic acids and derivatives	Carboxylic acids and derivatives	Amino acids, peptides, and analogues	20.8473	36.7309	18.0893	33.7128	8.14171	63.714	37.6262	62.4863	24.724	30.564	2.24703	27.2	15.9751	34.0503	35.4322	29.9533	12.4037	29.9153	47.0602	18.3901
neg_4649	6,7-Dimethyl-9-(2-acetoxyethyl)isoalloxazine	40.4	17.3	-0.602332	C16H16N4O4	327.11	3.0238	--	--	--	--	--	--	--	--	--	--	--	--	106.329	10.9933	40.5618	47.911	36.0086	166.728	20.1562	99.3065	196.375	114.012	111.042	52.5728	55.1739	21.5335	0.883077	111.833	156.762	117.632	137.478	154.556
neg_4652	4,11,17-Trihydroxy-5,7,9,13,15,19-docosahexaenoic acid	41.2	42.3	-14.3531	C22H32O5	375.212	3.01667	--	--	--	--	--	--	--	--	--	--	--	--	1.23e-12	23.1823	16.2932	53.8314	1.23e-12	57.9182	69.5006	71.355	21.4363	35.1353	1.23e-12	3.7549	1.23e-12	22.8324	160.459	115.323	11.2595	110.854	65.4179	54.2292
neg_4653	Senkyunolide A	41.4	28.9	17.5084	C12H16O2	383.23	3.01667	--	--	--	--	--	--	HMDB0258235	--	Organic compounds	Organoheterocyclic compounds	Isobenzofurans	--	1.23e-12	15.6813	1.2633	24.9864	2.97589	58.8457	92.5253	76.4732	1.70427	4.43802	1.23e-12	2.33339	1.23e-12	1.65628	23.606	100.367	0.188877	44.3077	65.0339	30.6143
neg_4656	Nicotinamide-beta-riboside	41.7	47	-4.37675	C11H15N2O5+	509.187	3.0238	C03150	Nicotinate and nicotinamide metabolism(ko00760);;Metabolic pathways(ko01100)	--	--	--	--	HMDB0000855	1341-23-7	Organic compounds	Organic oxygen compounds	Organooxygen compounds	Carbohydrates and carbohydrate conjugates	1200.6	2083.45	1460.62	2437.98	4294.53	695.346	1422.9	818.724	1339.25	1555.39	3041.51	2054.78	1918.03	1577.09	1305.28	1196.75	1597.05	1209.2	799.262	1723.16
neg_4657	dTDP-4-oxo-2,3,6-trideoxy-D-glucose	40.7	25	14.8158	C16H24N2O13P2	513.076	3.01667	C18032	Polyketide sugar unit biosynthesis(ko00523);;Metabolic pathways(ko01100);;Biosynthesis of secondary metabolites(ko01110);;Biosynthesis of nucleotide sugars(ko01250)	--	--	--	--	--	--	--	--	--	--	3.74219	0.0394974	0.769216	0.214005	12.4035	583.32	1.23e-12	203.136	1009.11	2493.91	9.87395	2.99647	1.82583	0.514808	1.23e-12	6.69985	909.842	208.654	127.387	301.853
neg_4667	Xylitol	44	46.1	20.1099	C5H12O5	173.046	3.03097	C00379	Pentose and glucuronate interconversions(ko00040);;Metabolic pathways(ko01100);;ABC transporters(ko02010)	--	--	--	--	HMDB0242149	--	Organic compounds	Organic oxygen compounds	Organooxygen compounds	Carbohydrates and carbohydrate conjugates	2.11029	28.0758	14.1117	10.9552	21.7791	27.3849	11.7607	15.6229	90.5649	37.3309	0.12106	7.5934	1.23e-12	16.5456	5.38545	7.65364	2.937	9.35892	10.5722	26.5754
neg_4669	Gastrodin	43.2	39.3	10.0105	C13H18O7	331.106	3.03097	C16964	--	--	--	--	--	HMDB0252648	--	Organic compounds	Organic oxygen compounds	Organooxygen compounds	Carbohydrates and carbohydrate conjugates	0.152655	1.23e-12	0.534458	0.195999	0.428986	90.3467	4.99631	28.8017	15.7762	77.8964	0.635712	0.0361823	1.23e-12	0.294872	1.23e-12	62.6966	88.4273	47.5822	87.4363	136.527
neg_4672	L-Normetanephrine	40	35.2	30.911	C9H13NO3	411.189	3.03097	C05589	Tyrosine metabolism(ko00350);;Metabolic pathways(ko01100)	--	--	--	--	HMDB0000819	97-31-4	Organic compounds	Benzenoids	Phenols	Methoxyphenols	129.667	637.447	1115.57	805.091	419.825	314.927	191.3	115.858	485.337	242.552	102.276	810.413	406.926	824.649	547.629	61.5569	137.051	96.4035	52.9773	54.0482
neg_4686	Glabrene	43	53.6	-38.8296	C20H18O4	367.106	3.04455	--	--	LMPK12080060	Polyketides [PK]	Flavonoids [PK12]	Isoflavans [PK1208]	HMDB0029530	60008-03-9	Organic compounds	Phenylpropanoids and polyketides	Isoflavonoids	Pyranoisoflavonoids	1918.1	1918.89	1733.01	1871.9	2141.63	3798.59	2466.97	2858.34	5047.91	4847.92	1600	1906.62	1412.8	3467.89	1558.46	2897.11	2695.76	4329.16	5950.15	4689.41
[truncated: 2,863 more rows]
